# Supplementary material for: Emergence of N antigen SARS-CoV-2 genetic variants escaping detection of antigenic tests
Source: medRxiv preprint, doi:10.1101/2021.03.25.21253802, version 1 (2021-03-26)
Supplement: GISAID acknowledgments [file 253802_file03.pdf]

We gratefully acknowledge the following Authors from the Originating laboratories responsible for obtaining the specimens, as well as the Submitting laboratories where the genome data were generated and shared via GISAID, on which this research is based.

All Submitters of data may be contacted directly via [www.gisaid.org](http://www.gisaid.org)

Authors are sorted alphabetically.

| Accession ID                                                                                                                                                                                                                                                                                                                                                                                                                                                                                                                                                                                                                                                                                                                                                                               | Originating Laboratory                                                                                                                                                                                                                                                                                                                                                                                                                                                                          | Submitting Laboratory                                                                                                                                                                                                                                                                         | Authors                                                                                                                                                                                                                                                                                                                                                                                                                                                                                                                                                                                                                                                                                                                                                                                                                                                                                                                                                                                                                                                                                                                        |
|--------------------------------------------------------------------------------------------------------------------------------------------------------------------------------------------------------------------------------------------------------------------------------------------------------------------------------------------------------------------------------------------------------------------------------------------------------------------------------------------------------------------------------------------------------------------------------------------------------------------------------------------------------------------------------------------------------------------------------------------------------------------------------------------|-------------------------------------------------------------------------------------------------------------------------------------------------------------------------------------------------------------------------------------------------------------------------------------------------------------------------------------------------------------------------------------------------------------------------------------------------------------------------------------------------|-----------------------------------------------------------------------------------------------------------------------------------------------------------------------------------------------------------------------------------------------------------------------------------------------|--------------------------------------------------------------------------------------------------------------------------------------------------------------------------------------------------------------------------------------------------------------------------------------------------------------------------------------------------------------------------------------------------------------------------------------------------------------------------------------------------------------------------------------------------------------------------------------------------------------------------------------------------------------------------------------------------------------------------------------------------------------------------------------------------------------------------------------------------------------------------------------------------------------------------------------------------------------------------------------------------------------------------------------------------------------------------------------------------------------------------------|
| EPI_ISL_875674                                                                                                                                                                                                                                                                                                                                                                                                                                                                                                                                                                                                                                                                                                                                                                             | "1.AO Universitaria 'S. Giovanni di Dio e Ruggi D'Aragona, Scuola Medica Salernitana' Hospital / 2.UOC di Virologia e Microbiologia, Università della Campania 'L. Vanvitelli' / 3.AO Universitaria 'Federico II' Napoli Hospital / 4.AORN 'San Giuseppe Moscati' Avellino Hospital / 5.AO 'San Pio - presidio G. Rummo' Benevento Hospital / 6.AO 'Sant'Anna e San Sebastiano' Caserta Hospital / 7.PO 'Maria Santissima Addolorata' Eboli Hospital / 8.Biogem Istituto di Ricerche Genetiche" | "1. Genome Research Center for Health (CRGS) / 2. Laboratory of Molecular Medicine and Genomics(LMMGe) / 3. Center for Research in Pure and Applied Mathematics (CRMPA)"                                                                                                                      | "Giorgio Giurato (Corresponding Author); Alessandro Weisz (Corresponding Author); Alessia Cossu; Aniello Gentile; Annamaria Salvati; Antonello Saccomanno; Arnolfo Petruzzello; Assunta Sellitto; Carlo Ferravante; Domenico Memoli; Domenico Palumbo; Elena Alexandrova; Emilia Vaccaro; Francesca Marciano; Francesca Rizzo (Corresponding Author); Gianluigi Franci; Giovanni Nassa; Giovanni Pecoraro; Giuseppe Fenza; Giuseppe Portella; Gregorio Goffredi; Ilaria Terenzi; Jessica Lamberti; Maddalena Schioppa; Maria Grazia Foti; Maria Landi; Marianna Scrima"; Mariarosaria Ingino; Massimiliano Galdiero; Maurizio Fumi; Michele Caraglia; Michele Cennamo; Oriana Strianese; Pasquale Pagliano; Rita Greco; Roberta Tarallo; Sonia Amabile; Teresa Rocco; Valeria Mirici Cappa; Vincenzo Rocco; Viola Melone; Vittoria Letizia; Ylenia D'Agostino                                                                                                                                                                                                                                                                  |
| EPI_ISL_833052 to 833054                                                                                                                                                                                                                                                                                                                                                                                                                                                                                                                                                                                                                                                                                                                                                                   | "Presidio Ospedaliero "San Liberatore" Atri                                                                                                                                                                                                                                                                                                                                                                                                                                                     | Istituto Zooprofilattico Sperimentale dell'Abruzzo e Molise "G. Caporale"                                                                                                                                                                                                                     | Ancora M; Calistri P; Cammà C; Curini V; Delli Compagni E; Di Domenico M; Di Pasquale A; Lorusso A; Mangone I; Marcacci M; Puglia I; Rinaldi A; Savini G                                                                                                                                                                                                                                                                                                                                                                                                                                                                                                                                                                                                                                                                                                                                                                                                                                                                                                                                                                       |
| EPI_ISL_833055 to 833056                                                                                                                                                                                                                                                                                                                                                                                                                                                                                                                                                                                                                                                                                                                                                                   | "SIESP DIPARTIMENTO DI PREVENZIONE CHIETI                                                                                                                                                                                                                                                                                                                                                                                                                                                       | Istituto Zooprofilattico Sperimentale dell'Abruzzo e Molise "G. Caporale"                                                                                                                                                                                                                     | Ancora M; Calistri P; Cammà C; Curini V; Delli Compagni E; Di Domenico M; Di Pasquale A; Lorusso A; Mangone I; Marcacci M; Puglia I; Rinaldi A; Savini G                                                                                                                                                                                                                                                                                                                                                                                                                                                                                                                                                                                                                                                                                                                                                                                                                                                                                                                                                                       |
| EPI_ISL_451971 to 451977, EPI_ISL_451979 to 451982, EPI_ISL_451984 to 451987                                                                                                                                                                                                                                                                                                                                                                                                                                                                                                                                                                                                                                                                                                               | 1. ViroGenetics - BSL3 Laboratory of Virology, Maopolska Centre of Biotechnology, Jagiellonian University; 2. II Department of Internal Medicine, Faculty of Medicine, Jagiellonian University Medical College; 3. DIAGNOSTYKA Ltd.                                                                                                                                                                                                                                                             | 1. ViroGenetics - BSL3 Laboratory of Virology, Maopolska Centre of Biotechnology, Jagiellonian University; 2. II Department of Internal Medicine, Faculty of Medicine, Jagiellonian University Medical College.                                                                               | Jakub Swadba; Krzysztof Pyr; Marcin Surmiak; Marek Sanak; Marta Rogalska-Kupiec; Monika Gsecka-Czapla; Pawe P abaj; Wojciech Branicki                                                                                                                                                                                                                                                                                                                                                                                                                                                                                                                                                                                                                                                                                                                                                                                                                                                                                                                                                                                          |
| EPI_ISL_455440 to 455453, EPI_ISL_492066 to 492073                                                                                                                                                                                                                                                                                                                                                                                                                                                                                                                                                                                                                                                                                                                                         | 1. ViroGenetics - BSL3 Laboratory of Virology, Maopolska Centre of Biotechnology, Jagiellonian University; 2. II Department of Internal Medicine, Faculty of Medicine, Jagiellonian University Medical College; 3. Narodowy Instytut Zdrowia Publicznego - Pastwowy Zakad Higieny (NIZP-PZH)                                                                                                                                                                                                    | 1. ViroGenetics - BSL3 Laboratory of Virology, Maopolska Centre of Biotechnology, Jagiellonian University; 2. II Department of Internal Medicine, Faculty of Medicine, Jagiellonian University Medical College; 3. Narodowy Instytut Zdrowia Publicznego - Pastwowy Zakad Higieny (NIZP-PZH). | Agnieszka Koakowska-Kulesza; Aleksandra A. Zasada; Aleksandra Milewska; Ewelina Hallman-Szeliska; Katarzyna Owczarek; Katarzyna Pancer; Katarzyna Zacharczuk; Krzysztof Pyr; Magdalena Rzeckowska; Marek Sanak; Natalia Wolaniuk; Pawe P abaj; Tomasz Wokowicz; Wojciech Branicki                                                                                                                                                                                                                                                                                                                                                                                                                                                                                                                                                                                                                                                                                                                                                                                                                                              |
| EPI_ISL_876042 to 876043, EPI_ISL_876969 to 877034, EPI_ISL_877036, EPI_ISL_882674 to 882688, EPI_ISL_882690 to 882768, EPI_ISL_883500, EPI_ISL_887506 to 887507, EPI_ISL_888679 to 888682, EPI_ISL_894218, EPI_ISL_918128, EPI_ISL_918412 to 918422, EPI_ISL_918457 to 918460, EPI_ISL_918462 to 918482, EPI_ISL_925093 to 925136, EPI_ISL_925497 to 925501, EPI_ISL_934419 to 934423, EPI_ISL_935104 to 935127, EPI_ISL_935129 to 935154, EPI_ISL_954183 to 954212, EPI_ISL_954214 to 954217                                                                                                                                                                                                                                                                                             | 1.AO Universitaria 'S. Giovanni di Dio e Ruggi D'Aragona, Scuola Medica Salernitana' Hospital / 2.UOC di Virologia e Microbiologia, Università della Campania 'L. Vanvitelli' / 3.AO Universitaria 'Federico II' Napoli Hospital / 4.AORN 'San Giuseppe Moscati' Avellino Hospital / 5.AO 'San Pio - presidio G. Rummo' Benevento Hospital / 6.AO 'Sant'Anna e San Sebastiano' Caserta Hospital / 7.PO 'Maria Santissima Addolorata' Eboli Hospital / 8.Biogem Istituto di Ricerche Genetiche   | 1. Genome Research Center for Health (CRGS) / 2. Laboratory of Molecular Medicine and Genomics(LMMGe) / 3. Center for Research in Pure and Applied Mathematics (CRMPA)                                                                                                                        | Alessandro Weisz; Alessandro Weisz (Corresponding Author); Alessia Cossu; Andreina Baj; Aniello Gentile; Annamaria Salvati; Antonello Saccomanno; Arnolfo Petruzzello; Assunta Sellitto; Carlo Ferravante; Domenico Memoli; Domenico Palumbo; Edmondo Adorisio; Elena Alexandrova; Emilia Vaccaro; Fausto Sessa; Francesca Marciano; Francesca Rizzo; Francesca Rizzo (Corresponding Author); Francesco Curcio; Gianluigi Franci; Giorgio Dirani; Giorgio Giurato; Giorgio Giurato (Corresponding Author); Giovanni Nassa; Giovanni Pecoraro; Giuseppe Fenza; Giuseppe Portella; Gregorio Goffredi; Ilaria Terenzi; Jessica Lamberti; Maddalena Schioppa; Maria Grazia Foti; Maria Landi; Marianna Scrima; Mariarosaria Ingino; Massimiliano Galdiero; Maurizio Fumi; Michela Iacobellis; Michele Caraglia; Michele Cennamo; Morena D'Avenia; Oriana Strianese; Pasquale Pagliano; Rita Greco; Roberta Tarallo; Rosanna Piluscio; Silvia Zanolì; Simona Sempirini; Sonia Amabile; Stefania Marzintotto; Teresa Rocco; Valeria Mirici Cappa; Vincenzo Rocco; Viola Melone; Vittoria Letizia; Vittorio Sambrì; Ylenia D'Agostino |
| EPI_ISL_729338, EPI_ISL_729340, EPI_ISL_729342 to 729345, EPI_ISL_729347, EPI_ISL_729351 to 729352, EPI_ISL_729354, EPI_ISL_729358 to 729359, EPI_ISL_729361 to 729364, EPI_ISL_729367 to 729369, EPI_ISL_729371 to 729376, EPI_ISL_729379 to 729380, EPI_ISL_729383 to 729385, EPI_ISL_729389 to 729392, EPI_ISL_729394 to 729396, EPI_ISL_729399, EPI_ISL_729401, EPI_ISL_729403, EPI_ISL_729407, EPI_ISL_729411, EPI_ISL_729414, EPI_ISL_729416 to 729467, EPI_ISL_729469, EPI_ISL_729498, EPI_ISL_729500 to 729506, EPI_ISL_729508 to 729513, EPI_ISL_729515 to 729528, EPI_ISL_729535 to 729547, EPI_ISL_729549 to 729552, EPI_ISL_729562 to 729595, EPI_ISL_729608 to 729687, EPI_ISL_729689 to 729717, EPI_ISL_729719 to 729734, EPI_ISL_824742 to 824786, EPI_ISL_849794 to 849866 | see above                                                                                                                                                                                                                                                                                                                                                                                                                                                                                       | A. Krumbholz, Labor Dr. Krause und Kollegen MVZ GmbH, Kiel                                                                                                                                                                                                                                    | Barbara Mühlemann; Christian Drosten; Julia Schneider; Julia Tesch; Jörn Beheim-Schwarzbach; Talitha Veith; Terry Jones; Tobias Bleicker; Victor M Corman                                                                                                                                                                                                                                                                                                                                                                                                                                                                                                                                                                                                                                                                                                                                                                                                                                                                                                                                                                      |
| EPI_ISL_766695, EPI_ISL_766698 to 766699, EPI_ISL_766708 to 766709, EPI_ISL_766715 to 766723                                                                                                                                                                                                                                                                                                                                                                                                                                                                                                                                                                                                                                                                                               | A05 Biomedicum                                                                                                                                                                                                                                                                                                                                                                                                                                                                                  | The Public Health Agency of Sweden                                                                                                                                                                                                                                                            | Department of Microbiology; The Public Health Agency of Sweden                                                                                                                                                                                                                                                                                                                                                                                                                                                                                                                                                                                                                                                                                                                                                                                                                                                                                                                                                                                                                                                                 |
| EPI_ISL_775533 to 775541, EPI_ISL_775550 to 775571, EPI_ISL_775575 to 775582, EPI_ISL_788991 to 788998, EPI_ISL_789000 to 789011, EPI_ISL_789014 to 789016, EPI_ISL_789018 to 789028, EPI_ISL_831944, EPI_ISL_831947 to 831952, EPI_ISL_831959, EPI_ISL_831982 to 831985                                                                                                                                                                                                                                                                                                                                                                                                                                                                                                                   | see above                                                                                                                                                                                                                                                                                                                                                                                                                                                                                       | ABC                                                                                                                                                                                                                                                                                           | Department of Microbiology; The Public Health Agency of Sweden                                                                                                                                                                                                                                                                                                                                                                                                                                                                                                                                                                                                                                                                                                                                                                                                                                                                                                                                                                                                                                                                 |
| EPI_ISL_763362 to 763363, EPI_ISL_768752 to 768753, EPI_ISL_768755, EPI_ISL_768757, EPI_ISL_768759 to 768760, EPI_ISL_768762 to 768797, EPI_ISL_768833                                                                                                                                                                                                                                                                                                                                                                                                                                                                                                                                                                                                                                     | see above                                                                                                                                                                                                                                                                                                                                                                                                                                                                                       | AIID                                                                                                                                                                                                                                                                                          | Alejandro Abner Garcia Leon; Gabriel Gonzalez; Michael Carr; Patrick Mallon                                                                                                                                                                                                                                                                                                                                                                                                                                                                                                                                                                                                                                                                                                                                                                                                                                                                                                                                                                                                                                                    |
| EPI_ISL_778819 to 778841, EPI_ISL_871793 to 871814                                                                                                                                                                                                                                                                                                                                                                                                                                                                                                                                                                                                                                                                                                                                         | AIID                                                                                                                                                                                                                                                                                                                                                                                                                                                                                            | Irish Coronavirus Sequencing Consortium-Teagasc Grange                                                                                                                                                                                                                                        | Aljandro Abner Garcia Leon; Calum Walsh; Fiona Crispie; Gabriel Gonzalez; John Kenny; Matthew McCabe; Michael Carr; Patrick Mallon; Paul Cotter                                                                                                                                                                                                                                                                                                                                                                                                                                                                                                                                                                                                                                                                                                                                                                                                                                                                                                                                                                                |
| EPI_ISL_418000 to 418001, EPI_ISL_418004                                                                                                                                                                                                                                                                                                                                                                                                                                                                                                                                                                                                                                                                                                                                                   | ARS Algarve - Laboratório Laura Ayres                                                                                                                                                                                                                                                                                                                                                                                                                                                           | Instituto Nacional de Saude (INSA)                                                                                                                                                                                                                                                            | Guiomar et al                                                                                                                                                                                                                                                                                                                                                                                                                                                                                                                                                                                                                                                                                                                                                                                                                                                                                                                                                                                                                                                                                                                  |
| EPI_ISL_542098 to 542277, EPI_ISL_542400 to 542443                                                                                                                                                                                                                                                                                                                                                                                                                                                                                                                                                                                                                                                                                                                                         | ASST GOM Niguarda                                                                                                                                                                                                                                                                                                                                                                                                                                                                               | Dep. Of Oncology and Hemato-Oncology University of Milan                                                                                                                                                                                                                                      | Antonio Piralla; Carlo Federico Perno; Chiara Vismara; Claudia Alteri; Elisa Matarazzo; Fausto Baldanti; Federica Giardina; Federica Novazzi; Luna Colagrossi; Maria Antonello; Massimo Puoti; Monica Tallarita; Oscar Massimiliano Epis; Roberto Fumagalli; Silvia Renica; Stefano Gaiarsa; Valentino Costabile; Valeria Cento                                                                                                                                                                                                                                                                                                                                                                                                                                                                                                                                                                                                                                                                                                                                                                                                |
| EPI_ISL_476135                                                                                                                                                                                                                                                                                                                                                                                                                                                                                                                                                                                                                                                                                                                                                                             | Achima Care Fristadens VC                                                                                                                                                                                                                                                                                                                                                                                                                                                                       | The Public Health Agency of Sweden                                                                                                                                                                                                                                                            | Anna Risberg; Anna-Malin Linde; Karin Tegmark-Wisell; Maria Lind Karlberg; Mattias Haukland; Mia Brytting; Olov Svartstrom; Oskar Karlsson Lindsjö; Petra Edquist; Reza Advani; Sandra Broddesson                                                                                                                                                                                                                                                                                                                                                                                                                                                                                                                                                                                                                                                                                                                                                                                                                                                                                                                              |
| EPI_ISL_509412 to 509413, EPI_ISL_509415 to 509417                                                                                                                                                                                                                                                                                                                                                                                                                                                                                                                                                                                                                                                                                                                                         | Acibadem Labcell Cellular Therapy Laboratory                                                                                                                                                                                                                                                                                                                                                                                                                                                    | Acibadem Mehmet Ali Aydinlar University School of Medicine, Medical Genetics Department                                                                                                                                                                                                       | Bulut Yurtsever; Cihan Tastan; Derya Dilek Kancagi; Ercument Ovali; Gozde Sir Karakus; Günseli Bayram Akcapinar; Ilayda Sahin; Ozden Hatimnaz Ng; Ozkan Ozdemir; Sezer Akyoney; Ugur Ozbek                                                                                                                                                                                                                                                                                                                                                                                                                                                                                                                                                                                                                                                                                                                                                                                                                                                                                                                                     |
| EPI_ISL_528934 to 528949                                                                                                                                                                                                                                                                                                                                                                                                                                                                                                                                                                                                                                                                                                                                                                   | Agenzia di Tutela della Salute di Bergamo                                                                                                                                                                                                                                                                                                                                                                                                                                                       | Istituto Zooprofilattico Sperimentale dell'Abruzzo e Molise "G.Caporale"                                                                                                                                                                                                                      | Ancora M; Cammà C; Curini V; Di Domenico M; Di Pasquale A; Lorusso A; Mangone I; Marcacci M; Puglia I; Rinaldi A; Savini G.                                                                                                                                                                                                                                                                                                                                                                                                                                                                                                                                                                                                                                                                                                                                                                                                                                                                                                                                                                                                    |
| EPI_ISL_420134, EPI_ISL_420136, EPI_ISL_420139, EPI_ISL_420311 to 420312, EPI_ISL_500779 to 500783, EPI_ISL_500793 to 500796, EPI_ISL_549083 to 549084, EPI_ISL_549089 to 549091, EPI_ISL_549169 to 549171, EPI_ISL_590889 to 590892, EPI_ISL_590951 to 590952, EPI_ISL_635102, EPI_ISL_635194, EPI_ISL_668391, EPI_ISL_668393, EPI_ISL_775269 to 775270, EPI_ISL_775275, EPI_ISL_775344, EPI_ISL_775387 to 775390, EPI_ISL_775479, EPI_ISL_775528 to 775530, EPI_ISL_796649, EPI_ISL_796665 to 796666, EPI_ISL_796699, EPI_ISL_796712 to 796713, EPI_ISL_813975, EPI_ISL_860223                                                                                                                                                                                                           | see above                                                                                                                                                                                                                                                                                                                                                                                                                                                                                       | Akershus University Hospital, Department for Microbiology and Infectious Disease Control                                                                                                                                                                                                      | Atiya R Ali; Hilde Elshaug; Hilde Synnøve Vollen; Hilde Vollen; Kamilla Heddeland Instefjord; Karoline Bragstad; Kathrine Stene-Johansen; Marie Paulsen Madsen; Olav Hungnes; Rasmus Riis Kopperud                                                                                                                                                                                                                                                                                                                                                                                                                                                                                                                                                                                                                                                                                                                                                                                                                                                                                                                             |
| EPI_ISL_569865 to 569886                                                                                                                                                                                                                                                                                                                                                                                                                                                                                                                                                                                                                                                                                                                                                                   | Amedeo di savoia                                                                                                                                                                                                                                                                                                                                                                                                                                                                                | Crosetto lab, Karolinska Institutet, SciLifeLab                                                                                                                                                                                                                                               | Anna Sapino; Luuk Harbers; Maria Grazia Milia; Michele Simonetti; Nicola Crosetto; Ning Zhang; Valeria Ghisetti                                                                                                                                                                                                                                                                                                                                                                                                                                                                                                                                                                                                                                                                                                                                                                                                                                                                                                                                                                                                                |

|                                                                                                                                                                                                                                                                                                                                                                                                                                                                                                                                                                                                                                                                                                                                                                                                                                                                                                                                                                                                                                                                                                                                                                                                                                                                                                                                                                                                                                                                                                                                |                                                                                        |                                                                                                                                 |                                                                                                                                                                                                                                                                                                                                                                                                                                                                                                                                                                                                                                           |
|--------------------------------------------------------------------------------------------------------------------------------------------------------------------------------------------------------------------------------------------------------------------------------------------------------------------------------------------------------------------------------------------------------------------------------------------------------------------------------------------------------------------------------------------------------------------------------------------------------------------------------------------------------------------------------------------------------------------------------------------------------------------------------------------------------------------------------------------------------------------------------------------------------------------------------------------------------------------------------------------------------------------------------------------------------------------------------------------------------------------------------------------------------------------------------------------------------------------------------------------------------------------------------------------------------------------------------------------------------------------------------------------------------------------------------------------------------------------------------------------------------------------------------|----------------------------------------------------------------------------------------|---------------------------------------------------------------------------------------------------------------------------------|-------------------------------------------------------------------------------------------------------------------------------------------------------------------------------------------------------------------------------------------------------------------------------------------------------------------------------------------------------------------------------------------------------------------------------------------------------------------------------------------------------------------------------------------------------------------------------------------------------------------------------------------|
| EPI_ISL_766587                                                                                                                                                                                                                                                                                                                                                                                                                                                                                                                                                                                                                                                                                                                                                                                                                                                                                                                                                                                                                                                                                                                                                                                                                                                                                                                                                                                                                                                                                                                 | Analytica Medizinische Laboratorien AG                                                 | Institute of Medical Virology, University of Zurich                                                                             | Alexandra Trkola; Annette Audigé; Cyril Shah; Jon Huder; Jürg Böni; Kevin Steiner; Maria Grünberg; Maryam Zaheri; Michael Huber; Riccarda Capaul; Stefan Schmutz; Verena Kufner                                                                                                                                                                                                                                                                                                                                                                                                                                                           |
| EPI_ISL_450818                                                                                                                                                                                                                                                                                                                                                                                                                                                                                                                                                                                                                                                                                                                                                                                                                                                                                                                                                                                                                                                                                                                                                                                                                                                                                                                                                                                                                                                                                                                 | Aneby VC                                                                               | The Public Health Agency of Sweden                                                                                              | Anna Risberg; Anna-Malin Linde; Karin Tegmark-Wisell; Ken Granath; Maria Lind Karlberg; Mia Brytting; Olov Svartstrom; Oskar Karlsson Lindsjo; Theresa Enkirch                                                                                                                                                                                                                                                                                                                                                                                                                                                                            |
| EPI_ISL_582127 to 582132                                                                                                                                                                                                                                                                                                                                                                                                                                                                                                                                                                                                                                                                                                                                                                                                                                                                                                                                                                                                                                                                                                                                                                                                                                                                                                                                                                                                                                                                                                       | Antwerp University Hospital                                                            | Institute of Tropical Medicine                                                                                                  | Colin Anthony; Philippe Selhorst                                                                                                                                                                                                                                                                                                                                                                                                                                                                                                                                                                                                          |
| EPI_ISL_512656                                                                                                                                                                                                                                                                                                                                                                                                                                                                                                                                                                                                                                                                                                                                                                                                                                                                                                                                                                                                                                                                                                                                                                                                                                                                                                                                                                                                                                                                                                                 | Area De Salud Pavas (Coopesalud) [Pavas/San Jose]                                      | Incienza, Instituto Costarricense de Investigación y Enseñanza en Nutrición y Salud                                             | Adriana Godínez & Melany Calderon; Claudio Soto-Garita; Estela Cordero; Francisco Duarte; Hebleen Porras                                                                                                                                                                                                                                                                                                                                                                                                                                                                                                                                  |
| EPI_ISL_457826                                                                                                                                                                                                                                                                                                                                                                                                                                                                                                                                                                                                                                                                                                                                                                                                                                                                                                                                                                                                                                                                                                                                                                                                                                                                                                                                                                                                                                                                                                                 | Army Medical Center - Scientific Department                                            | Army Medical and Veterinary Research Center                                                                                     | Anna Anselmo; Antonella Fortunato; Florigio Lista; Francesco Giordani; Giovanni Faggioni; Nino D'Amore; Riccardo De Sanctis; Silvia Fillo; Vanessa Vera Fain                                                                                                                                                                                                                                                                                                                                                                                                                                                                              |
| EPI_ISL_717978                                                                                                                                                                                                                                                                                                                                                                                                                                                                                                                                                                                                                                                                                                                                                                                                                                                                                                                                                                                                                                                                                                                                                                                                                                                                                                                                                                                                                                                                                                                 | Army Medical Center, Scientific Department, Virology Laboratory                        | Army Medical Center, Scientific Department, Virology Laboratory                                                                 | Alessandra Amoroso; Andrea Ciammarucconi; Anella Monte; Anna Anselmo; Annalisa Pelo; Antonella Fortunato; Federica Galeano; Florigio Lista.; Francesco Giordani; Giovanni Faggioni; Giulia Campoli; Margherita De Santis; Marzia Cavalli; Nino D'Amore; Riccardo De Santis; Roberta Sorrentino; Rossella Tirelli; Silvia Fillo; Stella Lia; Vanessa Vera Fain                                                                                                                                                                                                                                                                             |
| EPI_ISL_457825                                                                                                                                                                                                                                                                                                                                                                                                                                                                                                                                                                                                                                                                                                                                                                                                                                                                                                                                                                                                                                                                                                                                                                                                                                                                                                                                                                                                                                                                                                                 | Army Medical Research Center - Scientific Department                                   | Army Medical and Veterinary Research Center                                                                                     | Anna Anselmo; Antonella Fortunato; Florigio Lista; Francesco Giordani; Giovanni Faggioni; Nino D'Amore; Riccardo De Sanctis; Silvia Fillo; Vanessa Vera Fain                                                                                                                                                                                                                                                                                                                                                                                                                                                                              |
| EPI_ISL_475830 to 475872, EPI_ISL_475874 to 475882, EPI_ISL_475884 to 475886, EPI_ISL_583573 to 583578, EPI_ISL_583630 to 583631, EPI_ISL_583633 to 583637, EPI_ISL_583639 to 583640, EPI_ISL_583642 to 583655, EPI_ISL_583657 to 583676, EPI_ISL_583678 to 583690, EPI_ISL_583883 to 583892, EPI_ISL_853733, EPI_ISL_853738, EPI_ISL_853749, EPI_ISL_853758, EPI_ISL_853779 to 853782, EPI_ISL_853790 to 853791, EPI_ISL_853793 to 853794, EPI_ISL_853797, EPI_ISL_853800 to 853801, EPI_ISL_853803 to 853804, EPI_ISL_853815, EPI_ISL_853818, EPI_ISL_853965 to 853972, EPI_ISL_853975 to 854040, EPI_ISL_854113 to 854175, EPI_ISL_854209, EPI_ISL_854213, EPI_ISL_854215 to 854216, EPI_ISL_854228, EPI_ISL_854243 to 854252, EPI_ISL_854254, EPI_ISL_854262 to 854281, EPI_ISL_854285 to 854294, EPI_ISL_854297, EPI_ISL_854301, EPI_ISL_854304                                                                                                                                                                                                                                                                                                                                                                                                                                                                                                                                                                                                                                                                           |                                                                                        |                                                                                                                                 |                                                                                                                                                                                                                                                                                                                                                                                                                                                                                                                                                                                                                                           |
| see above                                                                                                                                                                                                                                                                                                                                                                                                                                                                                                                                                                                                                                                                                                                                                                                                                                                                                                                                                                                                                                                                                                                                                                                                                                                                                                                                                                                                                                                                                                                      | Austrian Agency for Health and Food Safety (AGES)                                      | Berghthaler laboratory, CeMM Research Center for Molecular Medicine of the Austrian Academy of Sciences                         | Adi Steinrigl; Alexander Lercher; Alexandra Popa; Andreas Berghthaler; Anna Schedl; Benedikt Agerer; Christian Paar; Christoph Bock; Christoph Bock; Daniela Schmid; Dorothee von Laer; Elisabeth Puchhammer-Stoeckl; Franz Allerberger; Gernot Walder; Gregor Hörmann; Guenter Weiss; Gunther Vogl; Henrique Colaco; Jakob-Wendelin Genger; Jan Laine; Judith Aberle; Kinga Rigler-Hohenwarter; Lukas Endler; Manfred Nairz; Mark Smyth; Martin Senekowitsch; Martin Senekowitsch; Michael Schuster; Michael Schuster; Peter Hufnagel; Peter Obriest; Rainer Gattringer; Sabine Sussitz-Rack; Stephan Aberle; Thomas Penz; Wegene Borena |
| EPI_ISL_415590                                                                                                                                                                                                                                                                                                                                                                                                                                                                                                                                                                                                                                                                                                                                                                                                                                                                                                                                                                                                                                                                                                                                                                                                                                                                                                                                                                                                                                                                                                                 | BCCDC Public Health Laboratory                                                         | BCCDC Public Health Laboratory                                                                                                  | Choi; Gilmour; Harrigan; Hoang; Kamelian; Kraiden; Lapointe; Lee; Levett; Li; Loman; Prystajec; Quick; Sekirov; Snutch; Tyson                                                                                                                                                                                                                                                                                                                                                                                                                                                                                                             |
| EPI_ISL_500716                                                                                                                                                                                                                                                                                                                                                                                                                                                                                                                                                                                                                                                                                                                                                                                                                                                                                                                                                                                                                                                                                                                                                                                                                                                                                                                                                                                                                                                                                                                 | BSL3 Lab Pendik Veterinary Control Institute                                           | Department of Medicinal Genetics, Bursa Uluda University, Faculty of medicine By Sehim Gulsün Temel, Adem Alemdar, Kadir Yeliba | Ahmet Sait; Cumhur ADIAY; Fahriye SARAC; Hakan ENUL; Kadir YESILBAG; Mustafa HASOKSUZ; Oguz KARABEY; Orbay SAYI; Osman ERGANIS; Serdar UZAR                                                                                                                                                                                                                                                                                                                                                                                                                                                                                               |
| EPI_ISL_491476                                                                                                                                                                                                                                                                                                                                                                                                                                                                                                                                                                                                                                                                                                                                                                                                                                                                                                                                                                                                                                                                                                                                                                                                                                                                                                                                                                                                                                                                                                                 | BSL3 Lab, Pendik Veterinary Control Ensttue                                            | Genomic Laboratory (GLAB), Istanbul Technical University                                                                        | Ahmet Sait; Cumhur ADIAY; Fahriye SARAC; Hakan ENUL; Kadir YESILBAG; Mustafa HASOKSUZ; Oguz KARABEY; Orbay SAYI; Osman ERGANIS; Serdar UZAR                                                                                                                                                                                                                                                                                                                                                                                                                                                                                               |
| EPI_ISL_539886, EPI_ISL_710613, EPI_ISL_732657, EPI_ISL_766645                                                                                                                                                                                                                                                                                                                                                                                                                                                                                                                                                                                                                                                                                                                                                                                                                                                                                                                                                                                                                                                                                                                                                                                                                                                                                                                                                                                                                                                                 | Barnakuten                                                                             | The Public Health Agency of Sweden                                                                                              | Anna Risberg; Anna-Malin Linde; Department of Microbiology; Karin Tegmark-Wisell; Maria Lind Karlberg; Mattias Haukland; Mia Brytting; Olov Svartstrom; Oskar Karlsson Lindsjo; Reza Advani; Sandra Brodsson; The Public Health Agency of Sweden; Theresa Enkirch                                                                                                                                                                                                                                                                                                                                                                         |
| EPI_ISL_855549                                                                                                                                                                                                                                                                                                                                                                                                                                                                                                                                                                                                                                                                                                                                                                                                                                                                                                                                                                                                                                                                                                                                                                                                                                                                                                                                                                                                                                                                                                                 | Barts Health NHS Trust                                                                 | Barts Health NHS Trust                                                                                                          | BROAD; Beatrix; CUTINO-MOGUEL; Claire; David; Dola; HARRINGTON; KELE; KULASEGARAN-SHYLINI; Maria-Teresa; OWOYEMI; Raghavendran                                                                                                                                                                                                                                                                                                                                                                                                                                                                                                            |
| EPI_ISL_842793 to 842802, EPI_ISL_842804 to 842809, EPI_ISL_842811 to 842825, EPI_ISL_842827 to 842832, EPI_ISL_842834 to 842835, EPI_ISL_842837 to 842840, EPI_ISL_842844, EPI_ISL_842847 to 842854, EPI_ISL_842856 to 842857, EPI_ISL_842859, EPI_ISL_842862 to 842865, EPI_ISL_842867 to 842868, EPI_ISL_842870 to 842871, EPI_ISL_842873 to 842886, EPI_ISL_842890 to 842895, EPI_ISL_842897 to 842901, EPI_ISL_842903 to 842905, EPI_ISL_842907 to 842929, EPI_ISL_842931, EPI_ISL_842933 to 842944, EPI_ISL_842947 to 842986, EPI_ISL_842988 to 842993, EPI_ISL_842995 to 843005, EPI_ISL_843007 to 843008, EPI_ISL_843010 to 843043, EPI_ISL_843045 to 843047, EPI_ISL_843049 to 843062, EPI_ISL_843064 to 843118, EPI_ISL_843121 to 843133, EPI_ISL_843135, EPI_ISL_843137 to 843145, EPI_ISL_843147 to 843150, EPI_ISL_865488 to 865489, EPI_ISL_865492 to 865498, EPI_ISL_865501 to 865522, EPI_ISL_865524 to 865527, EPI_ISL_865529 to 865560, EPI_ISL_865562 to 865564, EPI_ISL_865566 to 865570, EPI_ISL_865576 to 865580, EPI_ISL_865582 to 865583                                                                                                                                                                                                                                                                                                                                                                                                                                                               |                                                                                        |                                                                                                                                 |                                                                                                                                                                                                                                                                                                                                                                                                                                                                                                                                                                                                                                           |
| see above                                                                                                                                                                                                                                                                                                                                                                                                                                                                                                                                                                                                                                                                                                                                                                                                                                                                                                                                                                                                                                                                                                                                                                                                                                                                                                                                                                                                                                                                                                                      | Barts Health NHS Trust                                                                 | COVID-19 Genomics UK (COG-UK) Consortium                                                                                        | BROAD; Beatrix; CUTINO-MOGUEL; Claire; David; Dola; HARRINGTON; KELE; KULASEGARAN-SHYLINI; Maria-Teresa; OWOYEMI; Raghavendran; SHYLINI                                                                                                                                                                                                                                                                                                                                                                                                                                                                                                   |
| EPI_ISL_541752, EPI_ISL_541754 to 541755, EPI_ISL_541757 to 541759, EPI_ISL_541761 to 541766, EPI_ISL_541768 to 541772, EPI_ISL_541775 to 541781, EPI_ISL_541783                                                                                                                                                                                                                                                                                                                                                                                                                                                                                                                                                                                                                                                                                                                                                                                                                                                                                                                                                                                                                                                                                                                                                                                                                                                                                                                                                               |                                                                                        |                                                                                                                                 |                                                                                                                                                                                                                                                                                                                                                                                                                                                                                                                                                                                                                                           |
| see above                                                                                                                                                                                                                                                                                                                                                                                                                                                                                                                                                                                                                                                                                                                                                                                                                                                                                                                                                                                                                                                                                                                                                                                                                                                                                                                                                                                                                                                                                                                      | Barts Health NHS Trust                                                                 | Wellcome Sanger Institute for the COVID-19 Genomics UK (COG-UK) consortium                                                      | Beatrix Kele; Cordelia Langford; David Harrington and Alex Alderton; David K. Jackson; Dominic Kwiatkowski; Ewan Harrison; Ian Johnston; John Sillitoe on behalf of the Wellcome Sanger Institute COVID-19 Surveillance Team; Mark Hopkins; Roberto Amato; Sonia Goncalves; Teresa Cutino-Moguel                                                                                                                                                                                                                                                                                                                                          |
| EPI_ISL_457824                                                                                                                                                                                                                                                                                                                                                                                                                                                                                                                                                                                                                                                                                                                                                                                                                                                                                                                                                                                                                                                                                                                                                                                                                                                                                                                                                                                                                                                                                                                 | Bezmialem Vakif University, Dept Microbiology, Medical School, Fatih, Istanbul, Turkey | Bezmialem Vakif University, Medical School & Beykoz Institute of Life Sciences & Biotechnology                                  | Bilge Sumbul; Elif Karaaslan; Filiz Guney; Mehmet Z. Doymaz; Merve Kalkan; Nesibe Cetin                                                                                                                                                                                                                                                                                                                                                                                                                                                                                                                                                   |
| EPI_ISL_861865 to 861866                                                                                                                                                                                                                                                                                                                                                                                                                                                                                                                                                                                                                                                                                                                                                                                                                                                                                                                                                                                                                                                                                                                                                                                                                                                                                                                                                                                                                                                                                                       | Bioanalytika AG                                                                        | University Hospital Basel, Clinical Bacteriology                                                                                | Adrian Egli; Adrian Härri; Alfredo Mari; Hans Hirsch; Helena MB Seth-Smith; Julia Bielicki; Karoline Leuzinger; Madlen Stange; Manuel Battegay; Tim Roloff                                                                                                                                                                                                                                                                                                                                                                                                                                                                                |
| EPI_ISL_814287 to 814290, EPI_ISL_814292, EPI_ISL_814351, EPI_ISL_814357 to 814361, EPI_ISL_814417 to 814421, EPI_ISL_814424 to 814438, EPI_ISL_814517 to 814522, EPI_ISL_814524 to 814525, EPI_ISL_814530, EPI_ISL_814532, EPI_ISL_814538 to 814539, EPI_ISL_814543 to 814544, EPI_ISL_814548, EPI_ISL_814610 to 814619, EPI_ISL_816686, EPI_ISL_816688 to 816693, EPI_ISL_816695 to 816728, EPI_ISL_816730 to 816769, EPI_ISL_816771 to 816934, EPI_ISL_816936 to 817001, EPI_ISL_817003 to 817064, EPI_ISL_817066 to 817068, EPI_ISL_817070 to 817122, EPI_ISL_842355 to 842398, EPI_ISL_842400 to 842445, EPI_ISL_842447 to 842470, EPI_ISL_842472 to 842493, EPI_ISL_842496 to 842502, EPI_ISL_842504 to 842511, EPI_ISL_842513 to 842524, EPI_ISL_842526 to 842544, EPI_ISL_842546 to 842582, EPI_ISL_842584 to 842591, EPI_ISL_842593 to 842596, EPI_ISL_842598 to 842608, EPI_ISL_868716 to 868769, EPI_ISL_868771 to 868785, EPI_ISL_868787 to 868791, EPI_ISL_868793 to 868808, EPI_ISL_868810 to 868817, EPI_ISL_868819 to 868826, EPI_ISL_868828 to 868830, EPI_ISL_868832 to 868888, EPI_ISL_868890 to 868900, EPI_ISL_868902 to 868903, EPI_ISL_868905, EPI_ISL_868907, EPI_ISL_868909 to 868929, EPI_ISL_868931 to 868937, EPI_ISL_868940, EPI_ISL_868942 to 868948, EPI_ISL_868950 to 869025, EPI_ISL_869027 to 869044, EPI_ISL_869047, EPI_ISL_869051 to 869054, EPI_ISL_869056, EPI_ISL_869058, EPI_ISL_869061 to 869062, EPI_ISL_869067, EPI_ISL_869069, EPI_ISL_869071 to 869075, EPI_ISL_869077 to 869078 |                                                                                        |                                                                                                                                 |                                                                                                                                                                                                                                                                                                                                                                                                                                                                                                                                                                                                                                           |
| see above                                                                                                                                                                                                                                                                                                                                                                                                                                                                                                                                                                                                                                                                                                                                                                                                                                                                                                                                                                                                                                                                                                                                                                                                                                                                                                                                                                                                                                                                                                                      | Bioinformatics and Biostatistics Lab, Advanced Sequencing Facility                     | COVID-19 Genomics UK (COG-UK) Consortium                                                                                        | Aengus Stewart; Chelsea Sawyer; Harshil Patel; Jerome Nicod; Laura Cubitt; Margaret Crawford                                                                                                                                                                                                                                                                                                                                                                                                                                                                                                                                              |
| EPI_ISL_505003                                                                                                                                                                                                                                                                                                                                                                                                                                                                                                                                                                                                                                                                                                                                                                                                                                                                                                                                                                                                                                                                                                                                                                                                                                                                                                                                                                                                                                                                                                                 | Biology Dpt                                                                            | Microbiology and Infections Diseases                                                                                            | Annabelle Garnier; Audrey Ferrier-Rembert; Clarisse Vigne; Emilie Tessier; Emmanuelle Billon-Denis; Flora Nolent; Isabelle Drouet; Jean-Nicolas Tournier; Jessica Denis; Laurence Cheutin; Noémie Verguet; Olivier Ferraris; Olivier Gorgé                                                                                                                                                                                                                                                                                                                                                                                                |
| EPI_ISL_506041                                                                                                                                                                                                                                                                                                                                                                                                                                                                                                                                                                                                                                                                                                                                                                                                                                                                                                                                                                                                                                                                                                                                                                                                                                                                                                                                                                                                                                                                                                                 | Biology Dpt, HIA Percy                                                                 | Microbiology and Infectious Diseases Dpt                                                                                        | Annabelle Garnier; Audrey Ferrier-Rembert; Clarisse Vigne; Emilie Tessier; Emmanuelle Billon-Denis; Flora Nolent; Isabelle Drouet; Jean-Nicolas Tournier; Jessica Denis; Laurence Cheutin; Noémie Verguet; Olivier Ferraris; Olivier Gorgé                                                                                                                                                                                                                                                                                                                                                                                                |
| EPI_ISL_516079 to 516088                                                                                                                                                                                                                                                                                                                                                                                                                                                                                                                                                                                                                                                                                                                                                                                                                                                                                                                                                                                                                                                                                                                                                                                                                                                                                                                                                                                                                                                                                                       | Biomedical Sciences and Public Health, Polytechnic University of Marche                | Biomedical Sciences and Public Health, Polytechnic University of Marche                                                         | Alessandrini, F.; Bagnarelli, P.; Cuccini, S.; Di Sante, L.; Melchionda, F.; Menzo, S.; Onofri, V.; Tagliabracchi, A.; Turchi, C.                                                                                                                                                                                                                                                                                                                                                                                                                                                                                                         |
| EPI_ISL_450813, EPI_ISL_475540                                                                                                                                                                                                                                                                                                                                                                                                                                                                                                                                                                                                                                                                                                                                                                                                                                                                                                                                                                                                                                                                                                                                                                                                                                                                                                                                                                                                                                                                                                 | Bla Kustens halsocentral                                                               | The Public Health Agency of Sweden                                                                                              | Anna Risberg; Anna-Malin Linde; Karin Tegmark-Wisell; Maria Lind Karlberg; Mattias Haukland; Mia Brytting; Olof Norrby; Olov Svartstrom; Oskar Karlsson Lindsjo; Reza Advani; Sandra Brodsson; Theresa Enkirch                                                                                                                                                                                                                                                                                                                                                                                                                            |
| EPI_ISL_414521, EPI_ISL_732525, EPI_ISL_732528 to 732541, EPI_ISL_732543 to 732564, EPI_ISL_732658, EPI_ISL_755639                                                                                                                                                                                                                                                                                                                                                                                                                                                                                                                                                                                                                                                                                                                                                                                                                                                                                                                                                                                                                                                                                                                                                                                                                                                                                                                                                                                                             | Bundeswehr Institute of Microbiology                                                   | Bundeswehr Institute of Microbiology                                                                                            | Alexandra Rehn; Christina Bugert; Elham Khatamzas; Enrico Georgi; Joachim Bugert; Malena Bestehorn-Willmann; Markus Antwerpen; Markus H Antwerpen and Roman Wölfel; Mathias C Walter; Mathias Walter; Michael von Bergwelt-Baildon; Roman Wölfel; Sabine Zange                                                                                                                                                                                                                                                                                                                                                                            |
| EPI_ISL_450832                                                                                                                                                                                                                                                                                                                                                                                                                                                                                                                                                                                                                                                                                                                                                                                                                                                                                                                                                                                                                                                                                                                                                                                                                                                                                                                                                                                                                                                                                                                 | Byjorden vardcentral                                                                   | The Public Health Agency of Sweden                                                                                              | Anna Risberg; Anna-Malin Linde; Karin Tegmark-Wisell; Maria Lind Karlberg; Mia Brytting; Olov Svartstrom; Oskar Karlsson Lindsjo; Pernilla Brunman; Theresa Enkirch                                                                                                                                                                                                                                                                                                                                                                                                                                                                       |
| EPI_ISL_524476                                                                                                                                                                                                                                                                                                                                                                                                                                                                                                                                                                                                                                                                                                                                                                                                                                                                                                                                                                                                                                                                                                                                                                                                                                                                                                                                                                                                                                                                                                                 | Bülach Hospital                                                                        | Institute of Medical Virology, University of Zurich                                                                             | Alexandra Trkola; Andrea Zbinden; Fiona Steiner; Gabriela Ziltener; Jon Huder; Jürg Böni; Maryam Zaheri; Michael Huber; Patrick Redli; Riccarda Capaul; Stefan Schmutz; Verena Kufner                                                                                                                                                                                                                                                                                                                                                                                                                                                     |
| EPI_ISL_539531                                                                                                                                                                                                                                                                                                                                                                                                                                                                                                                                                                                                                                                                                                                                                                                                                                                                                                                                                                                                                                                                                                                                                                                                                                                                                                                                                                                                                                                                                                                 | C.H.U Nuestra Señora de Candelaria                                                     | Instituto de Salud Carlos III                                                                                                   | A. Monzón; F. Casas; I; I. Jiménez; Iglesias-Caballero; M. Camarero; M. Cuesta; M. González-Esguevillas; M. Molinero Calamita; M. Zaballos; O. Díez; P. Jiménez; S. Juliá; S. Pozo; S. Varona                                                                                                                                                                                                                                                                                                                                                                                                                                             |
| EPI_ISL_644229 to 644230, EPI_ISL_644250 to 644254, EPI_ISL_644256, EPI_ISL_644258                                                                                                                                                                                                                                                                                                                                                                                                                                                                                                                                                                                                                                                                                                                                                                                                                                                                                                                                                                                                                                                                                                                                                                                                                                                                                                                                                                                                                                             | CEPHR / Mater Hospital                                                                 | Irish Coronavirus Sequencing Consortium - National Virus Reference Laboratory                                                   | Alejandro Abner Garcia Leon; Gabriel Gonzalez; Michael Carr; Patrick Mallon                                                                                                                                                                                                                                                                                                                                                                                                                                                                                                                                                               |
| EPI_ISL_644209 to 644215, EPI_ISL_644219 to 644227, EPI_ISL_644231 to 644236, EPI_ISL_644238 to 644240, EPI_ISL_644242 to 644245, EPI_ISL_644247 to 644248, EPI_ISL_644255, EPI_ISL_644257, EPI_ISL_644259 to 644265, EPI_ISL_644267 to 644319, EPI_ISL_644321, EPI_ISL_644323 to 644324, EPI_ISL_644326                                                                                                                                                                                                                                                                                                                                                                                                                                                                                                                                                                                                                                                                                                                                                                                                                                                                                                                                                                                                                                                                                                                                                                                                                       |                                                                                        |                                                                                                                                 |                                                                                                                                                                                                                                                                                                                                                                                                                                                                                                                                                                                                                                           |

|                                                                                                                                                                                                                                                                                                              |                                                                        |                                                                                          |                                                                                                                                                                                                                                                                                             |  |
|--------------------------------------------------------------------------------------------------------------------------------------------------------------------------------------------------------------------------------------------------------------------------------------------------------------|------------------------------------------------------------------------|------------------------------------------------------------------------------------------|---------------------------------------------------------------------------------------------------------------------------------------------------------------------------------------------------------------------------------------------------------------------------------------------|--|
| to 644345                                                                                                                                                                                                                                                                                                    |                                                                        |                                                                                          |                                                                                                                                                                                                                                                                                             |  |
| see above                                                                                                                                                                                                                                                                                                    | CEPHR / Vincent's Hospital                                             | Irish Coronavirus Sequencing Consortium - National Virus Reference Laboratory            | Alejandro Abner Garcia Leon; Gabriel Gonzalez; Michael Carr; Patrick Mallon                                                                                                                                                                                                                 |  |
| EPI_ISL_780418                                                                                                                                                                                                                                                                                               | CERBA LAB                                                              | CERBA LAB                                                                                | Costa JM; Haïm-Boukobza S; Hedbaut E; Lecorche E; Malek Ramdane; Olivi M; Roquebert B; Trombert S; Verdurne L                                                                                                                                                                               |  |
| EPI_ISL_421455, EPI_ISL_421479 to 421480, EPI_ISL_421485 to 421486                                                                                                                                                                                                                                           | CH Barreiro Montijo                                                    | Instituto Nacional de Saude (INSA)                                                       | Guiomar et al                                                                                                                                                                                                                                                                               |  |
| EPI_ISL_420041, EPI_ISL_420049 to 420050, EPI_ISL_420056 to 420057, EPI_ISL_421500, EPI_ISL_421509 to 421511, EPI_ISL_428353, EPI_ISL_428359 to 428360, EPI_ISL_443309, EPI_ISL_443316                                                                                                                       |                                                                        |                                                                                          |                                                                                                                                                                                                                                                                                             |  |
| see above                                                                                                                                                                                                                                                                                                    | CH Compiègne Laboratoire de Biologie                                   | National Reference Center for Viruses of Respiratory Infections, Institut Pasteur, Paris | Angela Brisebarre; Etienne Simon-Lorière; Flora Donati; Marion Barbet; Maud Vanpeene; Mélanie Albert; Méline Bizard; Olivia Raulin; Raulin Olivia; Sylvie Behillil; Sylvie van der Werf; Vincent Enouf                                                                                      |  |
| EPI_ISL_416493, EPI_ISL_420044, EPI_ISL_420053, EPI_ISL_428350                                                                                                                                                                                                                                               | CH Jean de Navarre Laboratoire de Biologie                             | National Reference Center for Viruses of Respiratory Infections, Institut Pasteur, Paris | Angela Brisebarre; Etienne Simon-Lorière; Flora Donati; Marion Barbet; Maud Vanpeene; Mélanie Albert; Méline Bizard; Méline Albert; Sylvie Behillil; Sylvie van der Werf; Vincent Enouf                                                                                                     |  |
| EPI_ISL_428358, EPI_ISL_428366                                                                                                                                                                                                                                                                               | CH Jeanne de Navarre Laboratoire de Biologie                           | National Reference Center for Viruses of Respiratory Infections, Institut Pasteur, Paris | Angela Brisebarre; Etienne Simon-Lorière; Flora Donati; Marion Barbet; Maud Vanpeene; Mélanie Albert; Méline Bizard; Sylvie Behillil; Sylvie van der Werf; Vincent Enouf                                                                                                                    |  |
| EPI_ISL_421482 to 421484                                                                                                                                                                                                                                                                                     | CH VN Gaia - Espinho                                                   | Instituto Nacional de Saude (INSA)                                                       | Guiomar et al                                                                                                                                                                                                                                                                               |  |
| EPI_ISL_792008 to 792015                                                                                                                                                                                                                                                                                     | CH de Bethune - Laboratoire de Biologie Médicale                       | National Reference Center for Viruses of Respiratory Infections, Institut Pasteur, Paris | Angela Brisebarre; Camille Capel; Etienne Simon-Lorière; Léa Pilorgé; Marion Barbet; Maud Vanpeene; Méline Bizard; Sylvie Behillil; Sylvie van der Werf; Vincent Enouf                                                                                                                      |  |
| EPI_ISL_418006                                                                                                                                                                                                                                                                                               | CHBarreiro Montijo                                                     | Instituto Nacional de Saude (INSA)                                                       | Guiomar et al                                                                                                                                                                                                                                                                               |  |
| EPI_ISL_418017                                                                                                                                                                                                                                                                                               | CHMT                                                                   | Instituto Nacional de Saude (INSA)                                                       | Guiomar et al                                                                                                                                                                                                                                                                               |  |
| EPI_ISL_418222                                                                                                                                                                                                                                                                                               | CHRU Bretonneau - Serv. Bacterio-Virol.                                | National Reference Center for Viruses of Respiratory Infections, Institut Pasteur, Paris | Angela Brisebarre; Etienne Simon-Lorière; Fabiana Gambaro; Flora Donati; Julien Marlet; Marion Barbet; Maud Vanpeene; Mélanie Albert; Méline Bizard; Sylvie Behillil; Sylvie van der Werf; Vincent Enouf                                                                                    |  |
| EPI_ISL_416502 to 416513, EPI_ISL_443289 to 443294, EPI_ISL_734168 to 734169                                                                                                                                                                                                                                 | CHRU Pontchaillou - Laboratoire de Virologie                           | National Reference Center for Viruses of Respiratory Infections, Institut Pasteur, Paris | Angela Brisebarre; Camille Capel; Etienne Simon-Lorière; Flora Donati; Gisèle Lagathu; Marion Barbet; Maud Vanpeene; Mélanie Albert; Méline Bizard; Méline Albert; Sylvie Behillil; Sylvie van der Werf; Vincent Enouf                                                                      |  |
| EPI_ISL_613545 to 613559, EPI_ISL_614281                                                                                                                                                                                                                                                                     | CHRU Pontchaillou - Laboratoire de Virologie 2, rue Henri Le Guilloux  | National Reference Center for Viruses of Respiratory Infections, Institut Pasteur, Paris | Angela Brisebarre; Camille Capel; Etienne Simon-Lorière; Gisèle Lagathu; Marion Barbet; Maud Vanpeene; Méline Bizard; Sylvie Behillil; Sylvie van der Werf; Vincent Enouf                                                                                                                   |  |
| EPI_ISL_418027, EPI_ISL_421453, EPI_ISL_421464 to 421465                                                                                                                                                                                                                                                     | CHTMAD                                                                 | Instituto Nacional de Saude (INSA)                                                       | Guiomar et al                                                                                                                                                                                                                                                                               |  |
| EPI_ISL_791991 to 791999                                                                                                                                                                                                                                                                                     | CHU - Hôpital Cavale Blanche                                           | National Reference Center for Viruses of Respiratory Infections, Institut Pasteur, Paris | Angela Brisebarre; Camille Capel; Etienne Simon-Lorière; Léa Pilorgé; Marion Barbet; Maud Vanpeene; Méline Bizard; Sylvie Behillil; Sylvie van der Werf; Vincent Enouf                                                                                                                      |  |
| EPI_ISL_418219, EPI_ISL_443265 to 443283, EPI_ISL_754853 to 754856                                                                                                                                                                                                                                           | CHU - Hôpital Cavale Blanche - Labo. de Virologie                      | National Reference Center for Viruses of Respiratory Infections, Institut Pasteur, Paris | Angela Brisebarre; Camille Capel; Etienne Simon-Lorière; Fabiana Gambaro; Flora Donati; Léa Pilorge; Marion Barbet; Maud Vanpeene; Mélanie Albert; Méline Bizard; Pilorge léa; Sylvie Behillil; Sylvie van der Werf; Vincent Enouf                                                          |  |
| EPI_ISL_754842                                                                                                                                                                                                                                                                                               | CHU Amiens - Labo virologie                                            | National Reference Center for Viruses of Respiratory Infections, Institut Pasteur, Paris | Angela Brisebarre; Camille Capel; Castelain Sandrine; Etienne Simon-Lorière; François Catherine; Marion Barbet; Maud Vanpeene; Méline Bizard; Sylvie Behillil; Sylvie van der Werf; Vincent Enouf                                                                                           |  |
| EPI_ISL_645169 to 645172, EPI_ISL_649954 to 649971, EPI_ISL_660372, EPI_ISL_700326, EPI_ISL_768823, EPI_ISL_779786, EPI_ISL_779837 to 779844                                                                                                                                                                 |                                                                        |                                                                                          |                                                                                                                                                                                                                                                                                             |  |
| see above                                                                                                                                                                                                                                                                                                    | CHU Bordeaux                                                           | CNR Virus des Infections Respiratoires - France SUD                                      | Antonin Bal; Bruno Lina; Camille Ciccone; Gregory Destras; Gwendolyne Burfin; Hadrien Règue; Isabelle Garrigue; Laurence Josset; Marie-Edith Lafon; Martine Valette; Pantxika Bellecave; Pascale Trimoulet; Quentin Semanas                                                                 |  |
| EPI_ISL_641546 to 641550, EPI_ISL_645188 to 645196, EPI_ISL_660353 to 660371, EPI_ISL_745312 to 745315, EPI_ISL_745335 to 745336                                                                                                                                                                             | CHU Clermont-Ferrand                                                   | CNR Virus des Infections Respiratoires - France SUD                                      | Amélie Brebion; Antonin Bal; Audrey Mirand; Bruno Lina; Christel Regagnon; Christine Archimbaud; Cécile Henquell; Gregory Destras; Gwendolyne Burfin; Hadrien Règue; Hélène Chabrolles; Laurence Josset; Martine Chambon; Martine Valette; Maxime Bisseux; Patricia Combes; Quentin Semanas |  |
| EPI_ISL_418002                                                                                                                                                                                                                                                                                               | CHU Coimbra                                                            | Instituto Nacional de Saude (INSA)                                                       | Guiomar et al                                                                                                                                                                                                                                                                               |  |
| EPI_ISL_418005                                                                                                                                                                                                                                                                                               | CHU Coimbra - Pediátrico                                               | Instituto Nacional de Saude (INSA)                                                       | Guiomar et al                                                                                                                                                                                                                                                                               |  |
| EPI_ISL_416751 to 416752                                                                                                                                                                                                                                                                                     | CHU Gabriel Montpied                                                   | CNR Virus des Infections Respiratoires - France SUD                                      | Alexandre; Antonin; Bal; Bouscambert-Duchamp; Brengel-Pesce; Bruno.; Cheynet; Destras; Florence; Gaymard; Gregory; Josset; Karen; Laurence; Lina; Martine; Maude; Morfin-Sherpa; Valette; Valérie                                                                                           |  |
| EPI_ISL_641556, EPI_ISL_644681 to 644696, EPI_ISL_660672 to 660703, EPI_ISL_660705 to 660709                                                                                                                                                                                                                 | CHU Montpellier                                                        | CNR Virus des Infections Respiratoires - France SUD                                      | Antonin Bal; Bruno Lina; Gregory Destras; Gwendolyne Burfin; Hadrien Règue; Laurence Josset; Martine Valette; Michel Segondy; Quentin Semanas; Vincent Foulongne                                                                                                                            |  |
| EPI_ISL_645217 to 645218, EPI_ISL_649173 to 649187, EPI_ISL_663249 to 663284, EPI_ISL_666721 to 666724, EPI_ISL_700371                                                                                                                                                                                       | CHU Nantes                                                             | CNR Virus des Infections Respiratoires - France SUD                                      | Antonin Bal; Bruno Lina; Celine Bressollette; Gregory Destras; Gwendolyne Burfin; Hadrien Règue; Laurence Josset; Louise Castain; Martine Valette; Quentin Semanas; Virginie Ferré                                                                                                          |  |
| EPI_ISL_644697 to 644702, EPI_ISL_645197 to 645209, EPI_ISL_645215, EPI_ISL_660710 to 660731, EPI_ISL_663243 to 663248                                                                                                                                                                                       | CHU Nîmes                                                              | CNR Virus des Infections Respiratoires - France SUD                                      | Antonin Bal; Bruno Lina; Gregory Destras; Gwendolyne Burfin; Hadrien Règue; Jean-Philippe Lavigne; Laurence Josset; Marie-Josée Carles; Martine Valette; Maxence Lotellier; Quentin Semanas; Stephan Robin                                                                                  |  |
| EPI_ISL_645216, EPI_ISL_663227 to 663242, EPI_ISL_707781 to 707782, EPI_ISL_768822, EPI_ISL_779785                                                                                                                                                                                                           | CHU Poitiers                                                           | CNR Virus des Infections Respiratoires - France SUD                                      | Agnès Beby-Defaux; Antonin Bal; Bruno Lina; Clément Jousselin; Gregory Destras; Gwendolyne Burfin; Hadrien Règue; Laurence Josset; Magali Garcia; Martine Valette; Nicolas Lévêque; Quentin Semanas                                                                                         |  |
| EPI_ISL_591099, EPI_ISL_591541 to 591547, EPI_ISL_593855 to 593901, EPI_ISL_603216 to 603220, EPI_ISL_671941 to 671972, EPI_ISL_671975 to 671977, EPI_ISL_751448 to 751499, EPI_ISL_754136 to 754139, EPI_ISL_804370 to 804378, EPI_ISL_833457 to 833480, EPI_ISL_848063 to 848064, EPI_ISL_852814 to 852818 |                                                                        |                                                                                          |                                                                                                                                                                                                                                                                                             |  |
| see above                                                                                                                                                                                                                                                                                                    | CHU Purpan - Laboratoire de Virologie - Institut Fédératif de Biologie | CHU Purpan - Laboratoire de Virologie - Institut Fédératif de Biologie                   | Boyer P.; Carcenac R.; Dubois M.; Harter A.; Izopet J.; Latour J.; Ranger N.; Tremeaux P.                                                                                                                                                                                                   |  |
| EPI_ISL_424993, EPI_ISL_434616 to 434635, EPI_ISL_482879 to 482889                                                                                                                                                                                                                                           | CHU Purpan - Laboratoire de Virologie - Institut Fédératif de Biologie | Laboratoire de virologie - École Nationale Vétérinaire de Toulouse                       | Croville, G.; Guerin; Guillaume Croville; J.-L. and Izopet, J.; Jacques Izopet; Jean-Luc Guérin                                                                                                                                                                                             |  |
| EPI_ISL_641551 to 641555, EPI_ISL_660373 to 660377, EPI_ISL_660665 to 660671                                                                                                                                                                                                                                 | CHU Toulouse                                                           | CNR Virus des Infections Respiratoires - France SUD                                      | Antonin Bal; Bruno Lina; Gregory Destras; Gwendolyne Burfin; Hadrien Règue; Jean Michel Mansuy; Laurence Josset; Martine Valette; Quentin Semanas                                                                                                                                           |  |
| EPI_ISL_735391                                                                                                                                                                                                                                                                                               | CHU Tours                                                              | CNR Virus des Infections Respiratoires - France SUD                                      | Antonin Bal; Bruno Lina; Catherine Gaudy-Graffin; Claudia Gonzalez; Florence Morfin; Gregory Destras; Gwendolyne Burfin; Hadrien Regue; Julien Marlet; Karl Stefic; Laurence Josset; Martine Valette; Maude Bouscambert; Quentin Semanas; Thibault Guinoiseau; Yahia Mekki                  |  |
| EPI_ISL_443261 to 443264                                                                                                                                                                                                                                                                                     | CHU de Dijon - Laboratoire de Virologie                                | National Reference Center for Viruses of Respiratory Infections, Institut Pasteur, Paris | Angela Brisebarre; Etienne Simon-Lorière; Flora Donati; Jean-Baptiste Bour; Marion Barbet; Maud Vanpeene; Mélanie Albert; Méline Bizard; Sylvie Behillil; Sylvie van der Werf; Vincent Enouf                                                                                                |  |
| EPI_ISL_644673 to 644680, EPI_ISL_645174 to 645183, EPI_ISL_663206 to 663226, EPI_ISL_666711 to 666720                                                                                                                                                                                                       | CHU de Limoges                                                         | CNR Virus des Infections Respiratoires - France SUD                                      | Antonin Bal; Bruno Lina; Gregory Destras; Gwendolyne Burfin; Hadrien Règue; Laurence Josset; Martine Valette; Quentin Semanas; Sylvie Rogez                                                                                                                                                 |  |

|                                                                                                                                                                                                                                                                                                                                                                                                                                                                                                                                                                                                                                                                                                                                                                                                                                                                                                                                                                                                                                                                                                                                                                                                                                                                                            |                                                                              |                                                                                                                                                                                                                                                                                                                                                                                                                                                                                                           |                                                                                                                                                                                                                                                                                                                                         |
|--------------------------------------------------------------------------------------------------------------------------------------------------------------------------------------------------------------------------------------------------------------------------------------------------------------------------------------------------------------------------------------------------------------------------------------------------------------------------------------------------------------------------------------------------------------------------------------------------------------------------------------------------------------------------------------------------------------------------------------------------------------------------------------------------------------------------------------------------------------------------------------------------------------------------------------------------------------------------------------------------------------------------------------------------------------------------------------------------------------------------------------------------------------------------------------------------------------------------------------------------------------------------------------------|------------------------------------------------------------------------------|-----------------------------------------------------------------------------------------------------------------------------------------------------------------------------------------------------------------------------------------------------------------------------------------------------------------------------------------------------------------------------------------------------------------------------------------------------------------------------------------------------------|-----------------------------------------------------------------------------------------------------------------------------------------------------------------------------------------------------------------------------------------------------------------------------------------------------------------------------------------|
| EPI_ISL_645173                                                                                                                                                                                                                                                                                                                                                                                                                                                                                                                                                                                                                                                                                                                                                                                                                                                                                                                                                                                                                                                                                                                                                                                                                                                                             | CHU de Nice                                                                  | CNR Virus des Infections Respiratoires - France SUD                                                                                                                                                                                                                                                                                                                                                                                                                                                       | Antonin Bal; Bruno Lina; Gregory Destras; Gwendolyne Burfin; Géraldine Gonfrier; Hadrien Règue; Laurence Josset; Martine Valette; Quentin Semanas; Valérie Giordanengo                                                                                                                                                                  |
| EPI_ISL_641528                                                                                                                                                                                                                                                                                                                                                                                                                                                                                                                                                                                                                                                                                                                                                                                                                                                                                                                                                                                                                                                                                                                                                                                                                                                                             | CHU de Nice - Hôpital Archet 10                                              | CNR Virus des Infections Respiratoires - France SUD                                                                                                                                                                                                                                                                                                                                                                                                                                                       | Antonin Bal; Bruno Lina; Gregory Destras; Gwendolyne Burfin; Géraldine Gonfrier; Hadrien Règue; Laurence Josset; Martine Valette; Quentin Semanas; Valérie Giordanengo                                                                                                                                                                  |
| EPI_ISL_641529                                                                                                                                                                                                                                                                                                                                                                                                                                                                                                                                                                                                                                                                                                                                                                                                                                                                                                                                                                                                                                                                                                                                                                                                                                                                             | CHU de Nice - Hôpital Archet 11                                              | CNR Virus des Infections Respiratoires - France SUD                                                                                                                                                                                                                                                                                                                                                                                                                                                       | Antonin Bal; Bruno Lina; Gregory Destras; Gwendolyne Burfin; Géraldine Gonfrier; Hadrien Règue; Laurence Josset; Martine Valette; Quentin Semanas; Valérie Giordanengo                                                                                                                                                                  |
| EPI_ISL_641530                                                                                                                                                                                                                                                                                                                                                                                                                                                                                                                                                                                                                                                                                                                                                                                                                                                                                                                                                                                                                                                                                                                                                                                                                                                                             | CHU de Nice - Hôpital Archet 12                                              | CNR Virus des Infections Respiratoires - France SUD                                                                                                                                                                                                                                                                                                                                                                                                                                                       | Antonin Bal; Bruno Lina; Gregory Destras; Gwendolyne Burfin; Géraldine Gonfrier; Hadrien Règue; Laurence Josset; Martine Valette; Quentin Semanas; Valérie Giordanengo                                                                                                                                                                  |
| EPI_ISL_641531                                                                                                                                                                                                                                                                                                                                                                                                                                                                                                                                                                                                                                                                                                                                                                                                                                                                                                                                                                                                                                                                                                                                                                                                                                                                             | CHU de Nice - Hôpital Archet 13                                              | CNR Virus des Infections Respiratoires - France SUD                                                                                                                                                                                                                                                                                                                                                                                                                                                       | Antonin Bal; Bruno Lina; Gregory Destras; Gwendolyne Burfin; Géraldine Gonfrier; Hadrien Règue; Laurence Josset; Martine Valette; Quentin Semanas; Valérie Giordanengo                                                                                                                                                                  |
| EPI_ISL_641532                                                                                                                                                                                                                                                                                                                                                                                                                                                                                                                                                                                                                                                                                                                                                                                                                                                                                                                                                                                                                                                                                                                                                                                                                                                                             | CHU de Nice - Hôpital Archet 14                                              | CNR Virus des Infections Respiratoires - France SUD                                                                                                                                                                                                                                                                                                                                                                                                                                                       | Antonin Bal; Bruno Lina; Gregory Destras; Gwendolyne Burfin; Géraldine Gonfrier; Hadrien Règue; Laurence Josset; Martine Valette; Quentin Semanas; Valérie Giordanengo                                                                                                                                                                  |
| EPI_ISL_641533                                                                                                                                                                                                                                                                                                                                                                                                                                                                                                                                                                                                                                                                                                                                                                                                                                                                                                                                                                                                                                                                                                                                                                                                                                                                             | CHU de Nice - Hôpital Archet 15                                              | CNR Virus des Infections Respiratoires - France SUD                                                                                                                                                                                                                                                                                                                                                                                                                                                       | Antonin Bal; Bruno Lina; Gregory Destras; Gwendolyne Burfin; Géraldine Gonfrier; Hadrien Règue; Laurence Josset; Martine Valette; Quentin Semanas; Valérie Giordanengo                                                                                                                                                                  |
| EPI_ISL_641534                                                                                                                                                                                                                                                                                                                                                                                                                                                                                                                                                                                                                                                                                                                                                                                                                                                                                                                                                                                                                                                                                                                                                                                                                                                                             | CHU de Nice - Hôpital Archet 16                                              | CNR Virus des Infections Respiratoires - France SUD                                                                                                                                                                                                                                                                                                                                                                                                                                                       | Antonin Bal; Bruno Lina; Gregory Destras; Gwendolyne Burfin; Géraldine Gonfrier; Hadrien Règue; Laurence Josset; Martine Valette; Quentin Semanas; Valérie Giordanengo                                                                                                                                                                  |
| EPI_ISL_641520, EPI_ISL_693387 to 693390, EPI_ISL_779846                                                                                                                                                                                                                                                                                                                                                                                                                                                                                                                                                                                                                                                                                                                                                                                                                                                                                                                                                                                                                                                                                                                                                                                                                                   | CHU de Nice - Hôpital Archet 2                                               | CNR Virus des Infections Respiratoires - France SUD                                                                                                                                                                                                                                                                                                                                                                                                                                                       | Antonin Bal; Bruno Lina; Gregory Destras; Gwendolyne Burfin; Géraldine Gonfrier; Hadrien Règue; Laurence Josset; Martine Valette; Quentin Semanas; Valérie Giordanengo                                                                                                                                                                  |
| EPI_ISL_641522                                                                                                                                                                                                                                                                                                                                                                                                                                                                                                                                                                                                                                                                                                                                                                                                                                                                                                                                                                                                                                                                                                                                                                                                                                                                             | CHU de Nice - Hôpital Archet 3                                               | CNR Virus des Infections Respiratoires - France SUD                                                                                                                                                                                                                                                                                                                                                                                                                                                       | Antonin Bal; Bruno Lina; Gregory Destras; Gwendolyne Burfin; Géraldine Gonfrier; Hadrien Règue; Laurence Josset; Martine Valette; Quentin Semanas; Valérie Giordanengo                                                                                                                                                                  |
| EPI_ISL_641523                                                                                                                                                                                                                                                                                                                                                                                                                                                                                                                                                                                                                                                                                                                                                                                                                                                                                                                                                                                                                                                                                                                                                                                                                                                                             | CHU de Nice - Hôpital Archet 4                                               | CNR Virus des Infections Respiratoires - France SUD                                                                                                                                                                                                                                                                                                                                                                                                                                                       | Antonin Bal; Bruno Lina; Gregory Destras; Gwendolyne Burfin; Géraldine Gonfrier; Hadrien Règue; Laurence Josset; Martine Valette; Quentin Semanas; Valérie Giordanengo                                                                                                                                                                  |
| EPI_ISL_641524                                                                                                                                                                                                                                                                                                                                                                                                                                                                                                                                                                                                                                                                                                                                                                                                                                                                                                                                                                                                                                                                                                                                                                                                                                                                             | CHU de Nice - Hôpital Archet 5                                               | CNR Virus des Infections Respiratoires - France SUD                                                                                                                                                                                                                                                                                                                                                                                                                                                       | Antonin Bal; Bruno Lina; Gregory Destras; Gwendolyne Burfin; Géraldine Gonfrier; Hadrien Règue; Laurence Josset; Martine Valette; Quentin Semanas; Valérie Giordanengo                                                                                                                                                                  |
| EPI_ISL_641525                                                                                                                                                                                                                                                                                                                                                                                                                                                                                                                                                                                                                                                                                                                                                                                                                                                                                                                                                                                                                                                                                                                                                                                                                                                                             | CHU de Nice - Hôpital Archet 6                                               | CNR Virus des Infections Respiratoires - France SUD                                                                                                                                                                                                                                                                                                                                                                                                                                                       | Antonin Bal; Bruno Lina; Gregory Destras; Gwendolyne Burfin; Géraldine Gonfrier; Hadrien Règue; Laurence Josset; Martine Valette; Quentin Semanas; Valérie Giordanengo                                                                                                                                                                  |
| EPI_ISL_641526                                                                                                                                                                                                                                                                                                                                                                                                                                                                                                                                                                                                                                                                                                                                                                                                                                                                                                                                                                                                                                                                                                                                                                                                                                                                             | CHU de Nice - Hôpital Archet 7                                               | CNR Virus des Infections Respiratoires - France SUD                                                                                                                                                                                                                                                                                                                                                                                                                                                       | Antonin Bal; Bruno Lina; Gregory Destras; Gwendolyne Burfin; Géraldine Gonfrier; Hadrien Règue; Laurence Josset; Martine Valette; Quentin Semanas; Valérie Giordanengo                                                                                                                                                                  |
| EPI_ISL_641521                                                                                                                                                                                                                                                                                                                                                                                                                                                                                                                                                                                                                                                                                                                                                                                                                                                                                                                                                                                                                                                                                                                                                                                                                                                                             | CHU de Nice - Hôpital Archet 8                                               | CNR Virus des Infections Respiratoires - France SUD                                                                                                                                                                                                                                                                                                                                                                                                                                                       | Antonin Bal; Bruno Lina; Gregory Destras; Gwendolyne Burfin; Géraldine Gonfrier; Hadrien Règue; Laurence Josset; Martine Valette; Quentin Semanas; Valérie Giordanengo                                                                                                                                                                  |
| EPI_ISL_641527                                                                                                                                                                                                                                                                                                                                                                                                                                                                                                                                                                                                                                                                                                                                                                                                                                                                                                                                                                                                                                                                                                                                                                                                                                                                             | CHU de Nice - Hôpital Archet 9                                               | CNR Virus des Infections Respiratoires - France SUD                                                                                                                                                                                                                                                                                                                                                                                                                                                       | Antonin Bal; Bruno Lina; Gregory Destras; Gwendolyne Burfin; Géraldine Gonfrier; Hadrien Règue; Laurence Josset; Martine Valette; Quentin Semanas; Valérie Giordanengo                                                                                                                                                                  |
| EPI_ISL_641519, EPI_ISL_641535 to 641545, EPI_ISL_645184 to 645187, EPI_ISL_649942 to 649953, EPI_ISL_660326 to 660352, EPI_ISL_660432                                                                                                                                                                                                                                                                                                                                                                                                                                                                                                                                                                                                                                                                                                                                                                                                                                                                                                                                                                                                                                                                                                                                                     | CHU de Saint-Étienne Hôpital Nord                                            | CNR Virus des Infections Respiratoires - France SUD                                                                                                                                                                                                                                                                                                                                                                                                                                                       | Antonin Bal; Bruno Lina; Bruno Pozzetto; Gregory Destras; Gwendolyne Burfin; Hadrien Règue; Issam Behcri; Laurence Josset; Manon Vogrig; Marine Delorme; Martine Valette; Quentin Semanas; Sylvie Gonzalo; Sylvie Pillet; Thomas Bourlet                                                                                                |
| EPI_ISL_418024                                                                                                                                                                                                                                                                                                                                                                                                                                                                                                                                                                                                                                                                                                                                                                                                                                                                                                                                                                                                                                                                                                                                                                                                                                                                             | CHUA - Faro                                                                  | Instituto Nacional de Saude (INSA)                                                                                                                                                                                                                                                                                                                                                                                                                                                                        | Guimar et al                                                                                                                                                                                                                                                                                                                            |
| EPI_ISL_417988, EPI_ISL_417990 to 417991, EPI_ISL_417994 to 417996, EPI_ISL_418010 to 418016                                                                                                                                                                                                                                                                                                                                                                                                                                                                                                                                                                                                                                                                                                                                                                                                                                                                                                                                                                                                                                                                                                                                                                                               | CHULC - H Curry Cabral                                                       | Instituto Nacional de Saude (INSA)                                                                                                                                                                                                                                                                                                                                                                                                                                                                        | Guimar et al                                                                                                                                                                                                                                                                                                                            |
| EPI_ISL_417992 to 417993                                                                                                                                                                                                                                                                                                                                                                                                                                                                                                                                                                                                                                                                                                                                                                                                                                                                                                                                                                                                                                                                                                                                                                                                                                                                   | CHULC - H D Estefania                                                        | Instituto Nacional de Saude (INSA)                                                                                                                                                                                                                                                                                                                                                                                                                                                                        | Guimar et al                                                                                                                                                                                                                                                                                                                            |
| EPI_ISL_420043, EPI_ISL_420061                                                                                                                                                                                                                                                                                                                                                                                                                                                                                                                                                                                                                                                                                                                                                                                                                                                                                                                                                                                                                                                                                                                                                                                                                                                             | CMIP                                                                         | National Reference Center for Viruses of Respiratory Infections, Institut Pasteur, Paris                                                                                                                                                                                                                                                                                                                                                                                                                  | Angela Brisebarre; Etienne Simon-Lorière; Flora Donati; Marion Barbet; Maud Vanpeene; Mélanie Albert; Méline Bizard; Sylvie Behillili; Sylvie van der Werf; Vincent Enouf                                                                                                                                                               |
| EPI_ISL_410486, EPI_ISL_416745 to 416746, EPI_ISL_508912 to 508930, EPI_ISL_508933, EPI_ISL_508937, EPI_ISL_508939 to 508940, EPI_ISL_508942, EPI_ISL_508945, EPI_ISL_508948, EPI_ISL_508951, EPI_ISL_508953 to 508957, EPI_ISL_508961 to 508965, EPI_ISL_508967, EPI_ISL_508969 to 508974, EPI_ISL_508976 to 508977, EPI_ISL_508979 to 508997, EPI_ISL_508999 to 509002, EPI_ISL_525536 to 525538, EPI_ISL_525540 to 525543, EPI_ISL_578176 to 578177, EPI_ISL_582110 to 582120, EPI_ISL_582122, EPI_ISL_582508, EPI_ISL_623098 to 623102, EPI_ISL_636476 to 636477, EPI_ISL_636479, EPI_ISL_636484 to 636485, EPI_ISL_636487, EPI_ISL_636489 to 636490, EPI_ISL_639974 to 639977, EPI_ISL_639979 to 639983, EPI_ISL_639985 to 640014, EPI_ISL_676542 to 676573, EPI_ISL_678494 to 678508, EPI_ISL_678534 to 678547, EPI_ISL_681261 to 681263, EPI_ISL_683334 to 683384, EPI_ISL_683386 to 683402, EPI_ISL_684107, EPI_ISL_692733 to 692768, EPI_ISL_693488 to 693514, EPI_ISL_700327, EPI_ISL_728304 to 728320, EPI_ISL_728516 to 728551, EPI_ISL_730640 to 730651, EPI_ISL_732677 to 732703, EPI_ISL_745307 to 745311, EPI_ISL_745316 to 745334, EPI_ISL_745337 to 745397, EPI_ISL_768827 to 768828, EPI_ISL_779780, EPI_ISL_779783 to 779784, EPI_ISL_779787 to 779813, EPI_ISL_779845 | CNR Virus des Infections Respiratoires - France SUD                          | Alexandre; Alexandre Gaymard; Antonin; Antonin Bal; Bal; Bouscambert-Duchamp; Brengel-Pesce; Bruno Lina; Bruno.; Carine Moustaud; Cheynet; Claudia Gonzalez; Destras; Emilie Frobert; Florence; Florence Morfin-Sherpa; Gaymard; Gregory; Gregory Destras; Gregory Queromes; Gwendolyne Burfin; Hadrien Règue; Josset; Karen; Laurence; Laurence Josset; Lina; Martine; Martine Valette; Maude; Maude Bouscambert-Duchamp; Morfin-Sherpa; Quentin Semanas; Raphaëlle Lamy; Solenne Brun; Valette; Valérie |                                                                                                                                                                                                                                                                                                                                         |
| see above                                                                                                                                                                                                                                                                                                                                                                                                                                                                                                                                                                                                                                                                                                                                                                                                                                                                                                                                                                                                                                                                                                                                                                                                                                                                                  | CNR Virus des Infections Respiratoires - France SUD                          | CNR Virus des Infections Respiratoires - France SUD                                                                                                                                                                                                                                                                                                                                                                                                                                                       |                                                                                                                                                                                                                                                                                                                                         |
| EPI_ISL_416994, EPI_ISL_418248 to 418249                                                                                                                                                                                                                                                                                                                                                                                                                                                                                                                                                                                                                                                                                                                                                                                                                                                                                                                                                                                                                                                                                                                                                                                                                                                   | COMPLEJO ASISTENCIAL UNIVERSITARIO DE BURGOS                                 | Instituto de Salud Carlos III                                                                                                                                                                                                                                                                                                                                                                                                                                                                             | A. Monzón; F. Casas; G. Hospital: -----; I. Jiménez; I. Megias-Lobon G.; Iglesias-Caballero; M. Camarero; M. Camarero S. Pozo F. Casas I. Jiménez P. Jiménez M. Zaballos A. Monzón; M. Cuesta; M. González-Esguevillas; M. Molinero Calamita; M. Zaballos; P. Jiménez; S. Juliá; S. Juliá M. Cuesta I. Megias Lobón; S. Pozo; S. Varona |
| EPI_ISL_451935, EPI_ISL_452140, EPI_ISL_452142, EPI_ISL_452148 to 452152                                                                                                                                                                                                                                                                                                                                                                                                                                                                                                                                                                                                                                                                                                                                                                                                                                                                                                                                                                                                                                                                                                                                                                                                                   | CUB Hopital Erasme Laboratoire d'Anatomie Pathologique                       | CUB Hopital Erasme Laboratoire d'Anatomie Pathologique                                                                                                                                                                                                                                                                                                                                                                                                                                                    | Dr Nicky D'Haene; Dr. Nicky D'Haene; Dr.Nicky D'Haene; Isabelle Salmon; Nicky D'Haene; Nikcy D'Haene; Prof. Isabelle Salmon                                                                                                                                                                                                             |
| EPI_ISL_428364, EPI_ISL_428367, EPI_ISL_443300 to 443302, EPI_ISL_443306, EPI_ISL_443311 to 443313, EPI_ISL_443317                                                                                                                                                                                                                                                                                                                                                                                                                                                                                                                                                                                                                                                                                                                                                                                                                                                                                                                                                                                                                                                                                                                                                                         | Cabinet Médical                                                              | National Reference Center for Viruses of Respiratory Infections, Institut Pasteur, Paris                                                                                                                                                                                                                                                                                                                                                                                                                  | Angela Brisebarre; Etienne Simon-Lorière; Flora Donati; Marion Barbet; Maud Vanpeene; Mélanie Albert; Méline Bizard; Sylvie Behillili; Sylvie van der Werf; Vincent Enouf                                                                                                                                                               |
| EPI_ISL_418235                                                                                                                                                                                                                                                                                                                                                                                                                                                                                                                                                                                                                                                                                                                                                                                                                                                                                                                                                                                                                                                                                                                                                                                                                                                                             | Cabinet médical                                                              | National Reference Center for Viruses of Respiratory Infections, Institut Pasteur, Paris                                                                                                                                                                                                                                                                                                                                                                                                                  | Angela Brisebarre; Etienne Simon-Lorière; Flora Donati; Marion Barbet; Maud Vanpeene; Mélanie Albert; Méline Bizard; Sylvie Behillili; Sylvie van der Werf; Vincent Enouf                                                                                                                                                               |
| EPI_ISL_447054                                                                                                                                                                                                                                                                                                                                                                                                                                                                                                                                                                                                                                                                                                                                                                                                                                                                                                                                                                                                                                                                                                                                                                                                                                                                             | Cantacuzino National Military-Medical Institute for Research and Development | Cantacuzino Institute                                                                                                                                                                                                                                                                                                                                                                                                                                                                                     | A.Cretu; L.Ustea; M.Lazar                                                                                                                                                                                                                                                                                                               |
| EPI_ISL_730623                                                                                                                                                                                                                                                                                                                                                                                                                                                                                                                                                                                                                                                                                                                                                                                                                                                                                                                                                                                                                                                                                                                                                                                                                                                                             | Cantonal Hospital Frauenfeld                                                 | Institute of Medical Virology, University of Zurich                                                                                                                                                                                                                                                                                                                                                                                                                                                       | Alexandra Trkola; Gabriela Ziltener; Jürg Böni; Maryam Zaheri; Michael Huber; Stefan Schmutz; Verena Kufner                                                                                                                                                                                                                             |
| EPI_ISL_524478                                                                                                                                                                                                                                                                                                                                                                                                                                                                                                                                                                                                                                                                                                                                                                                                                                                                                                                                                                                                                                                                                                                                                                                                                                                                             | Cantonal Hospital Winterthur                                                 | Institute of Medical Virology, University of Zurich                                                                                                                                                                                                                                                                                                                                                                                                                                                       | Alexandra Trkola; Andrea Zbinden; Fiona Steiner; Gabriela Ziltener; Jon Huder; Jürg Böni; Maryam Zaheri; Michael Huber; Patrick Redli; Riccarda Capaul; Stefan Schmutz; Verena Kufner                                                                                                                                                   |
| EPI_ISL_710612                                                                                                                                                                                                                                                                                                                                                                                                                                                                                                                                                                                                                                                                                                                                                                                                                                                                                                                                                                                                                                                                                                                                                                                                                                                                             | Capio Bro VC                                                                 | The Public Health Agency of Sweden                                                                                                                                                                                                                                                                                                                                                                                                                                                                        | Department of Microbiology; The Public Health Agency of Sweden                                                                                                                                                                                                                                                                          |
| EPI_ISL_534230 to 534233, EPI_ISL_560981                                                                                                                                                                                                                                                                                                                                                                                                                                                                                                                                                                                                                                                                                                                                                                                                                                                                                                                                                                                                                                                                                                                                                                                                                                                   | Capio S:t Gorans sjukhus                                                     | The Public Health Agency of Sweden                                                                                                                                                                                                                                                                                                                                                                                                                                                                        | Anna Risberg; Anna-Malin Linde; Karin Tegmark-Wisell; Maria Lind Karlberg; Mattias Haukland; Mia Brytting; Olov Svartstrom; Oskar Karlsson Lindsjo; Petra Edquist; Reza Advani; Sandra Broddesson                                                                                                                                       |
| EPI_ISL_806783                                                                                                                                                                                                                                                                                                                                                                                                                                                                                                                                                                                                                                                                                                                                                                                                                                                                                                                                                                                                                                                                                                                                                                                                                                                                             | Casa di cura Di Lorenzo- Avezzano                                            | Istituto Zooprofilattico Sperimentale dell'Abruzzo e Molise "G. Caporale"                                                                                                                                                                                                                                                                                                                                                                                                                                 | Ancora M; Calistri P; Cammà C; Curini V; Di Domenico M; Di Pasquale A; Lorusso A; Mangone I; Marcacci M; Puglia I; Rinaldi A; Savini G                                                                                                                                                                                                  |

|                                                                                                                                                                                                                                                                                                                                                                                                                                                                                                                                                                                                                                                                                                                                                                                                                                                    |                                                                                           |                                                                                                                         |                                                                                                                                                                                                                                                                                                                                                                                                                                                                                                                                                                                                                                                                    |
|----------------------------------------------------------------------------------------------------------------------------------------------------------------------------------------------------------------------------------------------------------------------------------------------------------------------------------------------------------------------------------------------------------------------------------------------------------------------------------------------------------------------------------------------------------------------------------------------------------------------------------------------------------------------------------------------------------------------------------------------------------------------------------------------------------------------------------------------------|-------------------------------------------------------------------------------------------|-------------------------------------------------------------------------------------------------------------------------|--------------------------------------------------------------------------------------------------------------------------------------------------------------------------------------------------------------------------------------------------------------------------------------------------------------------------------------------------------------------------------------------------------------------------------------------------------------------------------------------------------------------------------------------------------------------------------------------------------------------------------------------------------------------|
| EPI_ISL_450413                                                                                                                                                                                                                                                                                                                                                                                                                                                                                                                                                                                                                                                                                                                                                                                                                                     | Center for Diagnostics, Institute of Medical Microbiology, Virology and Hygiene           | University Medical Center Hamburg-Eppendorf                                                                             | Huang, J.; Pfefferle; S. and Fischer, N.                                                                                                                                                                                                                                                                                                                                                                                                                                                                                                                                                                                                                           |
| EPI_ISL_419654 to 419656, EPI_ISL_419658 to 419674, EPI_ISL_437993 to 438009, EPI_ISL_438011 to 438020, EPI_ISL_438022 to 438026, EPI_ISL_438028 to 438043, EPI_ISL_438045 to 438103, EPI_ISL_438105 to 438115, EPI_ISL_438117 to 438123, EPI_ISL_438125 to 438128, EPI_ISL_475770, EPI_ISL_475772 to 475796, EPI_ISL_475798 to 475804, EPI_ISL_475806 to 475812, EPI_ISL_583563 to 583564, EPI_ISL_583566, EPI_ISL_583568 to 583570, EPI_ISL_583692 to 583694, EPI_ISL_583696 to 583698, EPI_ISL_583700 to 583702, EPI_ISL_583704 to 583715, EPI_ISL_583718 to 583721, EPI_ISL_583723 to 583726, EPI_ISL_583869 to 583881, EPI_ISL_853751, EPI_ISL_853759, EPI_ISL_853822 to 853853, EPI_ISL_853877 to 853913, EPI_ISL_853957 to 853961, EPI_ISL_854218 to 854219, EPI_ISL_854241, EPI_ISL_854253, EPI_ISL_854258, EPI_ISL_854295, EPI_ISL_854299 | Center for Virology, Medical University of Vienna                                         | Berghaler laboratory, CeMM Research Center for Molecular Medicine of the Austrian Academy of Sciences                   | Adi Steinrigl; Alexander Lercher; Alexandra Popa; Andreas Berghaler; Anna Schedl; Benedikt Agerer; Christian Paar; Christoph Bock; Christoph Bock; Daniela Schmid; Dorothee von Laer; Elisabeth Puchhammer-Stoeckl; Elisabeth Puchhammer-Stöckl; Franz Allerberger; Gernot Walder; Gregor Hörmann; Guenter Weiss; Gunther Vogl; Henrique Colaco; Jakob-Wendelin Genger; Jan Laine; Judith Aberle; Kinga Rigler-Hohenwarter; Lukas Endler; Manfred Nairz; Mark Smyth; Martin Senekowitsch; Martin Senekowitsch; Michael Schuster; Michael Schuster; Peter Hufnagl; Peter Obrist; Rainer Gattringer; Sabine Sussitz-Rack; Stephan Aberle; Thomas Penz; Wegene Borena |
| see above                                                                                                                                                                                                                                                                                                                                                                                                                                                                                                                                                                                                                                                                                                                                                                                                                                          | Center for Virology, Medical University of Vienna                                         | Berghaler laboratory, CeMM Research Center for Molecular Medicine of the Austrian Academy of Sciences                   |                                                                                                                                                                                                                                                                                                                                                                                                                                                                                                                                                                                                                                                                    |
| EPI_ISL_516414 to 516425, EPI_ISL_677700 to 677702, EPI_ISL_677706, EPI_ISL_677708, EPI_ISL_678248 to 678249                                                                                                                                                                                                                                                                                                                                                                                                                                                                                                                                                                                                                                                                                                                                       | Center for public health - Skopje                                                         | Research Center for Genetic Engineering and Biotechnology "Georgi D. Efremov" , Macedonian Academy of Sciences and Arts | RCGEB - MASA                                                                                                                                                                                                                                                                                                                                                                                                                                                                                                                                                                                                                                                       |
| EPI_ISL_755572 to 755574                                                                                                                                                                                                                                                                                                                                                                                                                                                                                                                                                                                                                                                                                                                                                                                                                           | Center of Advanced Studies and Technology, CAST                                           | Center of Advanced Studies and Technology, CAST                                                                         | De Fabritiis, S.; Ferrante, R.; Mandatori, D.                                                                                                                                                                                                                                                                                                                                                                                                                                                                                                                                                                                                                      |
| EPI_ISL_888674 to 888676                                                                                                                                                                                                                                                                                                                                                                                                                                                                                                                                                                                                                                                                                                                                                                                                                           | Center of Advanced Studies and Technology, Molecular Genetics Laboratory                  | Center of Advanced Studies and Technology, Molecular Genetics Laboratory                                                | De Fabritiis Simone; Ferrante Rossella; Mandatori Domitilla                                                                                                                                                                                                                                                                                                                                                                                                                                                                                                                                                                                                        |
| EPI_ISL_523950                                                                                                                                                                                                                                                                                                                                                                                                                                                                                                                                                                                                                                                                                                                                                                                                                                     | Center of Medical Microbiology, Virology, and Hospital Hygiene, University of Duesseldorf | Center of Medical Microbiology, Virology, and Hospital Hygiene, Heinrich Heine University Düsseldorf                    | Alexander Dilthey; Andreas Walker; Daniel Strelow; Hendrik Streeck; Jessica Nicolai; Jörg Timm; Klaus Pfeffer; Malte Kohns Vasconcelos; Marek Korencak; Maximilian Damagnez; Tobias Wienemann; Torsten Houwaart                                                                                                                                                                                                                                                                                                                                                                                                                                                    |
| EPI_ISL_413488, EPI_ISL_414497 to 414499, EPI_ISL_414504 to 414509, EPI_ISL_414574, EPI_ISL_417457 to 417459, EPI_ISL_417461 to 417468, EPI_ISL_419541 to 419543, EPI_ISL_419545 to 419547, EPI_ISL_419549 to 419552, EPI_ISL_425120 to 425140, EPI_ISL_452180, EPI_ISL_523927 to 523929, EPI_ISL_523931 to 523949, EPI_ISL_602510, EPI_ISL_602512, EPI_ISL_602514 to 602517, EPI_ISL_602533 to 602540, EPI_ISL_602542 to 602545, EPI_ISL_602547 to 602552, EPI_ISL_717976, EPI_ISL_779922 to 779953, EPI_ISL_832364 to 832374                                                                                                                                                                                                                                                                                                                     | Center of Medical Microbiology, Virology, and Hospital Hygiene, University of Duesseldorf | Center of Medical Microbiology, Virology, and Hospital Hygiene, University of Duesseldorf                               | Alexander Dilthey; Andreas Walker; Ashley-Jane Duplessis; Björn-Erik Jensen; Björn-Erik Jensen; Björn-Erik Jensen; Daniel Strelow; Detlef Kindgen-Milles; Hendrik Streeck; Jessica Nicolai; Jorg Timm; Jörg Timm; Klaus Pfeffer; Lisanna Hülse; Malte Kohns Vasconcelos; Marcel Andree; Marek Korencak; Maximilian Damagnez; Nadine Lübke; Ortwin Adams; Sandra Hauka; Teresa Tamayo; Tina Senff; Tobias Wienemann; Torsten Feldt; Torsten Houwaart                                                                                                                                                                                                                |
| see above                                                                                                                                                                                                                                                                                                                                                                                                                                                                                                                                                                                                                                                                                                                                                                                                                                          | Center of Medical Microbiology, Virology, and Hospital Hygiene, University of Duesseldorf | Center of Medical Microbiology, Virology, and Hospital Hygiene, University of Duesseldorf                               | Alexander Dilthey; Andreas Walker; Daniel Strelow; Hendrik Streeck; Jessica Nicolai; Jörg Timm; Klaus Pfeffer; Malte Kohns Vasconcelos; Marek Korencak; Maximilian Damagnez; Tobias Wienemann; Torsten Houwaart                                                                                                                                                                                                                                                                                                                                                                                                                                                    |
| EPI_ISL_523930                                                                                                                                                                                                                                                                                                                                                                                                                                                                                                                                                                                                                                                                                                                                                                                                                                     | Center of Medical Microbiology, Virology, and Hospital Hygiene, University of Duesseldorf | Universitätstr.1 40225 Düsseldorf Germany                                                                               | Alexander Dilthey; Andreas Walker; Daniel Strelow; Hendrik Streeck; Jessica Nicolai; Jörg Timm; Klaus Pfeffer; Malte Kohns Vasconcelos; Marek Korencak; Maximilian Damagnez; Tobias Wienemann; Torsten Houwaart                                                                                                                                                                                                                                                                                                                                                                                                                                                    |
| EPI_ISL_815257 to 815382, EPI_ISL_815384 to 815397                                                                                                                                                                                                                                                                                                                                                                                                                                                                                                                                                                                                                                                                                                                                                                                                 | Centogene                                                                                 | Centogene                                                                                                               | Krishna Kumar Kandaswamy; Peter Bauer; Vivi Hue-Trang Lieu                                                                                                                                                                                                                                                                                                                                                                                                                                                                                                                                                                                                         |
| EPI_ISL_457750, EPI_ISL_459962 to 459964                                                                                                                                                                                                                                                                                                                                                                                                                                                                                                                                                                                                                                                                                                                                                                                                           | Centogene AG                                                                              | Centogene AG                                                                                                            | Dr. Krishna Kumar Kandaswamy; Prof. Dr. Peter Bauer                                                                                                                                                                                                                                                                                                                                                                                                                                                                                                                                                                                                                |
| EPI_ISL_486410, EPI_ISL_486417                                                                                                                                                                                                                                                                                                                                                                                                                                                                                                                                                                                                                                                                                                                                                                                                                     | Centrala laboratorija                                                                     | Latvian Biomedical Research and Study Centre                                                                            | Ivars Silamielis; Jana Oste; Jnis Klovīš; Kaspars Megnis; Marta Priedte; Monta Ustinova; Stella Lapia; Uga Dumpis; Vita Rovtē; iikta Zrelavs                                                                                                                                                                                                                                                                                                                                                                                                                                                                                                                       |
| EPI_ISL_548256                                                                                                                                                                                                                                                                                                                                                                                                                                                                                                                                                                                                                                                                                                                                                                                                                                     | Centralsjukhuset                                                                          | The Public Health Agency of Sweden                                                                                      | Anna Risberg; Anna-Malin Linde; Karin Tegmark-Visell; Maria Lind Karlberg; Mattias Haukland; Mia Brytting; Olov Svartstrom; Oskar Karlsson Lindsjö; Petra Edquist; Reza Advani; Sandra Brodsson                                                                                                                                                                                                                                                                                                                                                                                                                                                                    |
| EPI_ISL_414624, EPI_ISL_416494                                                                                                                                                                                                                                                                                                                                                                                                                                                                                                                                                                                                                                                                                                                                                                                                                     | Centre Hositalier Universitaire de Rouen Laboratoire de Virologie                         | National Reference Center for Viruses of Respiratory Infections, Institut Pasteur, Paris                                | Angela Brisebarre; Etienne Simon-Lorière; Flora Donati Vincent Enouf; Jean-Christophe Plantier; Marion Barbet; Maud Vanpeene; Méline Bizard; Mélinie Albert; Sylvie Behillili; Sylvie van der Werf; Vincent Enouf                                                                                                                                                                                                                                                                                                                                                                                                                                                  |
| EPI_ISL_508958, EPI_ISL_509012                                                                                                                                                                                                                                                                                                                                                                                                                                                                                                                                                                                                                                                                                                                                                                                                                     | Centre Hospitalier Alpes Leman                                                            | CNR Virus des Infections Respiratoires - France SUD                                                                     | Alexandre Gaymard; Antonin Bal; Bruno Lina; Carine Moustaud; Florence Morfin-Sherpa; Gregory Destras; Gwendolyne Burfin; Laurence Josset; Martine Valette; Maude Bouscambert-Duchamp; Raphaëlle Lamy; Solenne Brun                                                                                                                                                                                                                                                                                                                                                                                                                                                 |
| EPI_ISL_414627 to 414630, EPI_ISL_414634 to 414638, EPI_ISL_415653 to 415654, EPI_ISL_416495 to 416497, EPI_ISL_418218, EPI_ISL_418220 to 418221, EPI_ISL_418223 to 418225, EPI_ISL_418227 to 418228, EPI_ISL_418231, EPI_ISL_418236 to 418239, EPI_ISL_429968                                                                                                                                                                                                                                                                                                                                                                                                                                                                                                                                                                                     | Centre Hospitalier Compiègne Laboratoire de Biologie                                      | National Reference Center for Viruses of Respiratory Infections, Institut Pasteur, Paris                                | Angela Brisebarre; Etienne Simon-Lorière; Fabiana Gambaro; Flora Donati; Flora Donati Vincent Enouf; Marion Barbet; Maud Vanpeene; Mélanie Albert; Méline Bizard; Mélinie Albert; Raulin Olivia; Sylvie Behillili; Sylvie van der Werf; Vincent Enouf                                                                                                                                                                                                                                                                                                                                                                                                              |
| see above                                                                                                                                                                                                                                                                                                                                                                                                                                                                                                                                                                                                                                                                                                                                                                                                                                          | Centre Hospitalier Compiègne Laboratoire de Biologie                                      | National Reference Center for Viruses of Respiratory Infections, Institut Pasteur, Paris                                | Angela Brisebarre; Etienne Simon-Lorière; Fabiana Gambaro; Flora Donati; Flora Donati Vincent Enouf; Marion Barbet; Maud Vanpeene; Mélanie Albert; Méline Bizard; Mélinie Albert; Raulin Olivia; Sylvie Behillili; Sylvie van der Werf; Vincent Enouf                                                                                                                                                                                                                                                                                                                                                                                                              |
| EPI_ISL_860898                                                                                                                                                                                                                                                                                                                                                                                                                                                                                                                                                                                                                                                                                                                                                                                                                                     | Centre Hospitalier Compiègne-Noyon - Laboratoire                                          | National Reference Center for Viruses of Respiratory Infections, Institut Pasteur, Paris                                | Angela Brisebarre; Camille Capel; Emond Jean-Philippe; Etienne Simon-Lorière; Marion Barbet; Maud Vanpeene; Méline Bizard; Sylvie Behillili; Sylvie van der Werf; Vincent Enouf                                                                                                                                                                                                                                                                                                                                                                                                                                                                                    |
| EPI_ISL_418428, EPI_ISL_508947                                                                                                                                                                                                                                                                                                                                                                                                                                                                                                                                                                                                                                                                                                                                                                                                                     | Centre Hospitalier Lucien Hussenl                                                         | CNR Virus des Infections Respiratoires - France SUD                                                                     | Alexandre Gaymard; Antonin Bal; Bruno Lina; Carine Moustaud; Florence Morfin-Sherpa; Gregory Destras; Gwendolyne Burfin; Laurence Josset; Martine Valette; Maude Bouscambert-Duchamp; Raphaëlle Lamy; Solenne Brun                                                                                                                                                                                                                                                                                                                                                                                                                                                 |
| EPI_ISL_508966, EPI_ISL_508975, EPI_ISL_508998, EPI_ISL_636478, EPI_ISL_636480, EPI_ISL_636482 to 636483, EPI_ISL_636486                                                                                                                                                                                                                                                                                                                                                                                                                                                                                                                                                                                                                                                                                                                           | Centre Hospitalier Pierre Oudot                                                           | CNR Virus des Infections Respiratoires - France SUD                                                                     | Alexandre Gaymard; Antonin Bal; Bruno Lina; Carine Moustaud; Florence Morfin-Sherpa; Gregory Destras; Gwendolyne Burfin; Hadrien Règue; Laurence Josset; Martine Valette; Maude Bouscambert-Duchamp; Raphaëlle Lamy; Solenne Brun                                                                                                                                                                                                                                                                                                                                                                                                                                  |
| see above                                                                                                                                                                                                                                                                                                                                                                                                                                                                                                                                                                                                                                                                                                                                                                                                                                          | Centre Hospitalier Pierre Oudot                                                           | CNR Virus des Infections Respiratoires - France SUD                                                                     | Alexandre Gaymard; Antonin Bal; Bruno Lina; Carine Moustaud; Florence Morfin-Sherpa; Gregory Destras; Gwendolyne Burfin; Hadrien Règue; Laurence Josset; Martine Valette; Maude Bouscambert-Duchamp; Raphaëlle Lamy; Solenne Brun                                                                                                                                                                                                                                                                                                                                                                                                                                  |
| EPI_ISL_414633                                                                                                                                                                                                                                                                                                                                                                                                                                                                                                                                                                                                                                                                                                                                                                                                                                     | Centre Hospitalier René Dubois Laboratoire de Microbiologie - Bât A                       | National Reference Center for Viruses of Respiratory Infections, Institut Pasteur, Paris                                | Angela Brisebarre; Flora Donati Vincent Enouf; Marion Barbet; Maud Vanpeene; Méline Bizard; Mélinie Albert; Pascale Martres; Sylvie Behillili; Sylvie van der Werf                                                                                                                                                                                                                                                                                                                                                                                                                                                                                                 |
| EPI_ISL_414625                                                                                                                                                                                                                                                                                                                                                                                                                                                                                                                                                                                                                                                                                                                                                                                                                                     | Centre Hospitalier Régional Universitaire de Nantes Laboratoire de Virologie              | National Reference Center for Viruses of Respiratory Infections, Institut Pasteur, Paris                                | Angela Brisebarre; Flora Donati Vincent Enouf; Marianne Coste-Burel; Marion Barbet; Maud Vanpeene; Méline Bizard; Mélinie Albert; Sylvie Behillili; Sylvie van der Werf                                                                                                                                                                                                                                                                                                                                                                                                                                                                                            |
| EPI_ISL_418418 to 418419, EPI_ISL_420617, EPI_ISL_508879 to 508880, EPI_ISL_508959 to 508960, EPI_ISL_639978                                                                                                                                                                                                                                                                                                                                                                                                                                                                                                                                                                                                                                                                                                                                       | Centre Hospitalier Saint Joseph Saint Luc                                                 | CNR Virus des Infections Respiratoires - France SUD                                                                     | Alexandre Gaymard; Antonin Bal; Bruno Lina; Carine Moustaud; Florence Morfin-Sherpa; Gregory Destras; Gwendolyne Burfin; Hadrien Règue; Laurence Josset; Martine Valette; Maude Bouscambert-Duchamp; Raphaëlle Lamy; Solenne Brun                                                                                                                                                                                                                                                                                                                                                                                                                                  |
| EPI_ISL_416757, EPI_ISL_417340, EPI_ISL_418426, EPI_ISL_419183, EPI_ISL_419185 to 419186, EPI_ISL_420620, EPI_ISL_508938, EPI_ISL_508944, EPI_ISL_508968, EPI_ISL_525539, EPI_ISL_582121, EPI_ISL_636481, EPI_ISL_639984                                                                                                                                                                                                                                                                                                                                                                                                                                                                                                                                                                                                                           | Centre Hospitalier de Bourg en Bresse                                                     | CNR Virus des Infections Respiratoires - France SUD                                                                     | Alexandre; Alexandre Gaymard; Antonin; Antonin Bal; Bal; Bouscambert-Duchamp; Brengel-Pesce; Bruno Lina; Bruno.; Carine Moustaud; Cheynet; Destras; Florence; Florence Morfin-Sherpa; Gaymard; Gregory; Gregory Destras; Gwendolyne Burfin; Hadrien Règue; Josset; Karen; Laurence; Laurence Josset; Lina; Martine; Martine Valette; Maude; Maude Bouscambert-Duchamp; Morfin-Sherpa; Raphaëlle Lamy; Solenne Brun; Valette; Valérie                                                                                                                                                                                                                               |
| see above                                                                                                                                                                                                                                                                                                                                                                                                                                                                                                                                                                                                                                                                                                                                                                                                                                          | Centre Hospitalier de Bourg en Bresse                                                     | CNR Virus des Infections Respiratoires - France SUD                                                                     | Alexandre; Alexandre Gaymard; Antonin; Antonin Bal; Bal; Bouscambert-Duchamp; Brengel-Pesce; Bruno Lina; Bruno.; Carine Moustaud; Cheynet; Destras; Florence; Florence Morfin-Sherpa; Gaymard; Gregory; Gregory Destras; Gwendolyne Burfin; Hadrien Règue; Josset; Karen; Laurence; Laurence Josset; Lina; Martine; Martine Valette; Maude; Maude Bouscambert-Duchamp; Morfin-Sherpa; Raphaëlle Lamy; Solenne Brun; Valette; Valérie                                                                                                                                                                                                                               |
| EPI_ISL_417338, EPI_ISL_418413, EPI_ISL_419174 to 419176, EPI_ISL_419187 to 419188, EPI_ISL_420612 to 420614, EPI_ISL_508875 to 508876, EPI_ISL_508941, EPI_ISL_508943, EPI_ISL_508946, EPI_ISL_508949 to 508950, EPI_ISL_508952, EPI_ISL_509005                                                                                                                                                                                                                                                                                                                                                                                                                                                                                                                                                                                                   | Centre Hospitalier de Macon                                                               | CNR Virus des Infections Respiratoires - France SUD                                                                     | Alexandre Gaymard; Antonin Bal; Bruno Lina; Carine Moustaud; Florence Morfin-Sherpa; Gregory Destras; Gwendolyne Burfin; Laurence Josset; Martine Valette; Maude Bouscambert-Duchamp; Raphaëlle Lamy; Solenne Brun                                                                                                                                                                                                                                                                                                                                                                                                                                                 |
| EPI_ISL_416749, EPI_ISL_418414 to 418415, EPI_ISL_418417, EPI_ISL_419168, EPI_ISL_508881                                                                                                                                                                                                                                                                                                                                                                                                                                                                                                                                                                                                                                                                                                                                                           | Centre Hospitalier de Valence                                                             | CNR Virus des Infections Respiratoires - France SUD                                                                     | Alexandre; Alexandre Gaymard; Antonin; Antonin Bal; Bal; Bouscambert-Duchamp; Brengel-Pesce; Bruno Lina; Bruno.; Carine Moustaud; Cheynet; Destras; Florence; Florence Morfin-Sherpa; Gaymard; Gregory; Gregory Destras; Gwendolyne Burfin; Josset; Karen; Laurence; Laurence Josset; Lina; Martine; Martine Valette; Maude; Maude Bouscambert-Duchamp; Morfin-Sherpa; Raphaëlle Lamy; Solenne Brun; Valette; Valérie                                                                                                                                                                                                                                              |
| EPI_ISL_508932, EPI_ISL_508978, EPI_ISL_509006, EPI_ISL_509015                                                                                                                                                                                                                                                                                                                                                                                                                                                                                                                                                                                                                                                                                                                                                                                     | Centre Hospitalier de Villefranche                                                        | CNR Virus des Infections Respiratoires - France SUD                                                                     | Alexandre Gaymard; Antonin Bal; Bruno Lina; Carine Moustaud; Florence Morfin-Sherpa; Gregory Destras; Gwendolyne Burfin; Laurence Josset; Martine Valette; Maude Bouscambert-Duchamp; Raphaëlle Lamy; Solenne Brun                                                                                                                                                                                                                                                                                                                                                                                                                                                 |
| EPI_ISL_418412                                                                                                                                                                                                                                                                                                                                                                                                                                                                                                                                                                                                                                                                                                                                                                                                                                     | Centre Hospitalier des Vals d'Ardeche                                                     | CNR Virus des Infections Respiratoires - France SUD                                                                     | Alexandre Gaymard; Antonin Bal; Bruno Lina; Carine Moustaud; Florence Morfin-Sherpa; Gregory Destras; Gwendolyne Burfin; Laurence Josset; Martine Valette; Maude Bouscambert-Duchamp; Raphaëlle Lamy; Solenne Brun                                                                                                                                                                                                                                                                                                                                                                                                                                                 |
| EPI_ISL_509016                                                                                                                                                                                                                                                                                                                                                                                                                                                                                                                                                                                                                                                                                                                                                                                                                                     | Centre Hospitalier du Haut-Bugey                                                          | CNR Virus des Infections Respiratoires - France SUD                                                                     | Alexandre Gaymard; Antonin Bal; Bruno Lina; Carine Moustaud; Florence Morfin-Sherpa; Gregory Destras; Gwendolyne Burfin; Laurence Josset; Martine Valette; Maude Bouscambert-Duchamp; Raphaëlle Lamy; Solenne Brun                                                                                                                                                                                                                                                                                                                                                                                                                                                 |
| EPI_ISL_779847                                                                                                                                                                                                                                                                                                                                                                                                                                                                                                                                                                                                                                                                                                                                                                                                                                     | Centre Hospotalier Cannes                                                                 | CNR Virus des Infections Respiratoires - France SUD                                                                     | Antonin Bal; Bruno Lina; Gregory Destras; Gwendolyne Burfin; Hadrien Règue; Laurence Josset; Martine Valette; Quentin Semanas                                                                                                                                                                                                                                                                                                                                                                                                                                                                                                                                      |
| EPI_ISL_443310                                                                                                                                                                                                                                                                                                                                                                                                                                                                                                                                                                                                                                                                                                                                                                                                                                     | Centre de santé Filiiris                                                                  | National Reference Center for Viruses of Respiratory                                                                    | Angela Brisebarre; Etienne Simon-Lorière; Flora Donati; Marion Barbet; Maud Vanpeene; Mélanie Albert; Méline Bizard; Sylvie Behillili; Sylvie van der                                                                                                                                                                                                                                                                                                                                                                                                                                                                                                              |

|                                                                                                                                                                                                                                                                                                                                                                                                                                                                                                                                                                                                                                                                                                                                                                                                                                                                                                                                                                                                                                                                                                                                                                                                                                                                                                                                                                                                                                                                                                                                                                                                                                                                                                                                                                                                                                                                                                                                                                                                                                                                                                                                                                                                                                                                                                                                                                                                                                                                                                                                                                                                                                                                                                                                                                                                                                                                                                                                                                                                                                                                                                                                                                                                                                                                                                                                                                                                                                                                                                                                                                                                                                                                                                                                                                                                                                                                                                                                                                                                                                                                                                                                                                                                                                                                                                                                                                                                                                                                                                                                                                                                                                                                                                                                                                                                                                                                                                                                                                                                                                                                                                                                                                                                                                                                                                                                                                                                                                                                                                                                                                                                                                                                                                                                                                                                                                                                                                                                                                                                                                                                                                                                                                                                                                                                                                                                                                                                                                                                                                                                                                                                          |                                                                                                                                                                                                                     |                                                                                                                                   |                                                                                                                                                                                                                                                                                        |
|----------------------------------------------------------------------------------------------------------------------------------------------------------------------------------------------------------------------------------------------------------------------------------------------------------------------------------------------------------------------------------------------------------------------------------------------------------------------------------------------------------------------------------------------------------------------------------------------------------------------------------------------------------------------------------------------------------------------------------------------------------------------------------------------------------------------------------------------------------------------------------------------------------------------------------------------------------------------------------------------------------------------------------------------------------------------------------------------------------------------------------------------------------------------------------------------------------------------------------------------------------------------------------------------------------------------------------------------------------------------------------------------------------------------------------------------------------------------------------------------------------------------------------------------------------------------------------------------------------------------------------------------------------------------------------------------------------------------------------------------------------------------------------------------------------------------------------------------------------------------------------------------------------------------------------------------------------------------------------------------------------------------------------------------------------------------------------------------------------------------------------------------------------------------------------------------------------------------------------------------------------------------------------------------------------------------------------------------------------------------------------------------------------------------------------------------------------------------------------------------------------------------------------------------------------------------------------------------------------------------------------------------------------------------------------------------------------------------------------------------------------------------------------------------------------------------------------------------------------------------------------------------------------------------------------------------------------------------------------------------------------------------------------------------------------------------------------------------------------------------------------------------------------------------------------------------------------------------------------------------------------------------------------------------------------------------------------------------------------------------------------------------------------------------------------------------------------------------------------------------------------------------------------------------------------------------------------------------------------------------------------------------------------------------------------------------------------------------------------------------------------------------------------------------------------------------------------------------------------------------------------------------------------------------------------------------------------------------------------------------------------------------------------------------------------------------------------------------------------------------------------------------------------------------------------------------------------------------------------------------------------------------------------------------------------------------------------------------------------------------------------------------------------------------------------------------------------------------------------------------------------------------------------------------------------------------------------------------------------------------------------------------------------------------------------------------------------------------------------------------------------------------------------------------------------------------------------------------------------------------------------------------------------------------------------------------------------------------------------------------------------------------------------------------------------------------------------------------------------------------------------------------------------------------------------------------------------------------------------------------------------------------------------------------------------------------------------------------------------------------------------------------------------------------------------------------------------------------------------------------------------------------------------------------------------------------------------------------------------------------------------------------------------------------------------------------------------------------------------------------------------------------------------------------------------------------------------------------------------------------------------------------------------------------------------------------------------------------------------------------------------------------------------------------------------------------------------------------------------------------------------------------------------------------------------------------------------------------------------------------------------------------------------------------------------------------------------------------------------------------------------------------------------------------------------------------------------------------------------------------------------------------------------------------------------------------------------------------------------|---------------------------------------------------------------------------------------------------------------------------------------------------------------------------------------------------------------------|-----------------------------------------------------------------------------------------------------------------------------------|----------------------------------------------------------------------------------------------------------------------------------------------------------------------------------------------------------------------------------------------------------------------------------------|
| EPI_ISL_466873                                                                                                                                                                                                                                                                                                                                                                                                                                                                                                                                                                                                                                                                                                                                                                                                                                                                                                                                                                                                                                                                                                                                                                                                                                                                                                                                                                                                                                                                                                                                                                                                                                                                                                                                                                                                                                                                                                                                                                                                                                                                                                                                                                                                                                                                                                                                                                                                                                                                                                                                                                                                                                                                                                                                                                                                                                                                                                                                                                                                                                                                                                                                                                                                                                                                                                                                                                                                                                                                                                                                                                                                                                                                                                                                                                                                                                                                                                                                                                                                                                                                                                                                                                                                                                                                                                                                                                                                                                                                                                                                                                                                                                                                                                                                                                                                                                                                                                                                                                                                                                                                                                                                                                                                                                                                                                                                                                                                                                                                                                                                                                                                                                                                                                                                                                                                                                                                                                                                                                                                                                                                                                                                                                                                                                                                                                                                                                                                                                                                                                                                                                                           | Centre for Clinical Infection and Diagnostics Research and Genomics Innovation Unit                                                                                                                                 | Respiratory Virus Unit, Microbiology Services Colindale, Public Health England                                                    | Ali Awan; Chloe Fisher; Gaia Nebbia; Luke Snell; PHE Covid Sequencing Team                                                                                                                                                                                                             |
| EPI_ISL_483922 to 483924, EPI_ISL_483928 to 483929, EPI_ISL_483931, EPI_ISL_483937, EPI_ISL_483945, EPI_ISL_483947 to 483948, EPI_ISL_483952 to 483953, EPI_ISL_483956, EPI_ISL_483959, EPI_ISL_483961, EPI_ISL_483964, EPI_ISL_483966 to 483968, EPI_ISL_483971, EPI_ISL_483976, EPI_ISL_483982, EPI_ISL_483986, EPI_ISL_483992, EPI_ISL_484005, EPI_ISL_484008, EPI_ISL_484012, EPI_ISL_484019 to 484020, EPI_ISL_484028, EPI_ISL_484034, EPI_ISL_484036, EPI_ISL_484053, EPI_ISL_484056, EPI_ISL_484059, EPI_ISL_484064, EPI_ISL_484070, EPI_ISL_484072, EPI_ISL_484079, EPI_ISL_484082, EPI_ISL_484085, EPI_ISL_484087, EPI_ISL_484091, EPI_ISL_484093, EPI_ISL_484095 to 484096, EPI_ISL_484104, EPI_ISL_484110, EPI_ISL_484115, EPI_ISL_484117, EPI_ISL_484125 to 484126, EPI_ISL_484129, EPI_ISL_484131, EPI_ISL_484134, EPI_ISL_484136, EPI_ISL_484145, EPI_ISL_484150, EPI_ISL_484152, EPI_ISL_484168 to 484170, EPI_ISL_484174, EPI_ISL_484189, EPI_ISL_484191                                                                                                                                                                                                                                                                                                                                                                                                                                                                                                                                                                                                                                                                                                                                                                                                                                                                                                                                                                                                                                                                                                                                                                                                                                                                                                                                                                                                                                                                                                                                                                                                                                                                                                                                                                                                                                                                                                                                                                                                                                                                                                                                                                                                                                                                                                                                                                                                                                                                                                                                                                                                                                                                                                                                                                                                                                                                                                                                                                                                                                                                                                                                                                                                                                                                                                                                                                                                                                                                                                                                                                                                                                                                                                                                                                                                                                                                                                                                                                                                                                                                                                                                                                                                                                                                                                                                                                                                                                                                                                                                                                                                                                                                                                                                                                                                                                                                                                                                                                                                                                                                                                                                                                                                                                                                                                                                                                                                                                                                                                                                                                                                                                 |                                                                                                                                                                                                                     |                                                                                                                                   |                                                                                                                                                                                                                                                                                        |
| see above                                                                                                                                                                                                                                                                                                                                                                                                                                                                                                                                                                                                                                                                                                                                                                                                                                                                                                                                                                                                                                                                                                                                                                                                                                                                                                                                                                                                                                                                                                                                                                                                                                                                                                                                                                                                                                                                                                                                                                                                                                                                                                                                                                                                                                                                                                                                                                                                                                                                                                                                                                                                                                                                                                                                                                                                                                                                                                                                                                                                                                                                                                                                                                                                                                                                                                                                                                                                                                                                                                                                                                                                                                                                                                                                                                                                                                                                                                                                                                                                                                                                                                                                                                                                                                                                                                                                                                                                                                                                                                                                                                                                                                                                                                                                                                                                                                                                                                                                                                                                                                                                                                                                                                                                                                                                                                                                                                                                                                                                                                                                                                                                                                                                                                                                                                                                                                                                                                                                                                                                                                                                                                                                                                                                                                                                                                                                                                                                                                                                                                                                                                                                | Centre for Clinical Infection and Diagnostics Research and Genomics Innovation Unit, Guy's and St. Thomas' NHS Trust                                                                                                | COVID-19 Genomics UK (COG-UK) Consortium                                                                                          | Ali Raza Awan; Chloe Fisher; Jonathan Edgeworth; Luke Snell; Penny Cliff; Rahul Batra                                                                                                                                                                                                  |
| EPI_ISL_560650, EPI_ISL_560652, EPI_ISL_560656, EPI_ISL_560658, EPI_ISL_560660 to 560661, EPI_ISL_560668, EPI_ISL_560671, EPI_ISL_560673, EPI_ISL_560678 to 560679, EPI_ISL_560684, EPI_ISL_560686, EPI_ISL_560697, EPI_ISL_560700 to 560701, EPI_ISL_560705, EPI_ISL_560719, EPI_ISL_560723, EPI_ISL_560727, EPI_ISL_560734, EPI_ISL_560736, EPI_ISL_561363, EPI_ISL_561365                                                                                                                                                                                                                                                                                                                                                                                                                                                                                                                                                                                                                                                                                                                                                                                                                                                                                                                                                                                                                                                                                                                                                                                                                                                                                                                                                                                                                                                                                                                                                                                                                                                                                                                                                                                                                                                                                                                                                                                                                                                                                                                                                                                                                                                                                                                                                                                                                                                                                                                                                                                                                                                                                                                                                                                                                                                                                                                                                                                                                                                                                                                                                                                                                                                                                                                                                                                                                                                                                                                                                                                                                                                                                                                                                                                                                                                                                                                                                                                                                                                                                                                                                                                                                                                                                                                                                                                                                                                                                                                                                                                                                                                                                                                                                                                                                                                                                                                                                                                                                                                                                                                                                                                                                                                                                                                                                                                                                                                                                                                                                                                                                                                                                                                                                                                                                                                                                                                                                                                                                                                                                                                                                                                                                             |                                                                                                                                                                                                                     |                                                                                                                                   |                                                                                                                                                                                                                                                                                        |
| see above                                                                                                                                                                                                                                                                                                                                                                                                                                                                                                                                                                                                                                                                                                                                                                                                                                                                                                                                                                                                                                                                                                                                                                                                                                                                                                                                                                                                                                                                                                                                                                                                                                                                                                                                                                                                                                                                                                                                                                                                                                                                                                                                                                                                                                                                                                                                                                                                                                                                                                                                                                                                                                                                                                                                                                                                                                                                                                                                                                                                                                                                                                                                                                                                                                                                                                                                                                                                                                                                                                                                                                                                                                                                                                                                                                                                                                                                                                                                                                                                                                                                                                                                                                                                                                                                                                                                                                                                                                                                                                                                                                                                                                                                                                                                                                                                                                                                                                                                                                                                                                                                                                                                                                                                                                                                                                                                                                                                                                                                                                                                                                                                                                                                                                                                                                                                                                                                                                                                                                                                                                                                                                                                                                                                                                                                                                                                                                                                                                                                                                                                                                                                | Centre for Clinical Infection and Diagnostics Research and Genomics Innovation Unit, Guy's and St. Thomas' NHS Trust                                                                                                | Centre for Clinical Infection and Diagnostics Research and Genomics Innovation Unit, Guy's and St. Thomas' NHS Trust              | Ali Raza Awan; Chloe Fisher; Jonathan Edgeworth; Luke Snell; Rahul Batra                                                                                                                                                                                                               |
| EPI_ISL_453666 to 453668, EPI_ISL_453670 to 453674, EPI_ISL_453676 to 453693, EPI_ISL_461970 to 461971, EPI_ISL_461973 to 461981, EPI_ISL_461983 to 461997, EPI_ISL_475239 to 475249, EPI_ISL_475251 to 475265, EPI_ISL_475267 to 475293, EPI_ISL_475295 to 475303, EPI_ISL_475306 to 475341, EPI_ISL_479175 to 479181, EPI_ISL_479183 to 479194, EPI_ISL_484407 to 484408, EPI_ISL_484410 to 484413, EPI_ISL_484415 to 484432, EPI_ISL_493615 to 493623, EPI_ISL_493625 to 493634, EPI_ISL_493636 to 493638, EPI_ISL_493640 to 493641, EPI_ISL_493643 to 493665, EPI_ISL_499270 to 499273, EPI_ISL_499275 to 499329, EPI_ISL_507131 to 507157, EPI_ISL_512385 to 512388, EPI_ISL_512392 to 512422, EPI_ISL_512424 to 512435, EPI_ISL_514455 to 514457, EPI_ISL_514459 to 514466, EPI_ISL_514468 to 514513, EPI_ISL_517510 to 517530, EPI_ISL_517532 to 517541, EPI_ISL_526433 to 526436, EPI_ISL_529272, EPI_ISL_529303, EPI_ISL_529341 to 529352, EPI_ISL_529373 to 529377, EPI_ISL_529431 to 529432, EPI_ISL_529481, EPI_ISL_529491, EPI_ISL_529511, EPI_ISL_529525, EPI_ISL_529668 to 529674, EPI_ISL_535024 to 535025, EPI_ISL_535027 to 535042, EPI_ISL_549341, EPI_ISL_549343, EPI_ISL_549360, EPI_ISL_549363 to 549364, EPI_ISL_549366, EPI_ISL_549460 to 549476, EPI_ISL_559983, EPI_ISL_572715 to 572716, EPI_ISL_573253 to 573265, EPI_ISL_573870, EPI_ISL_577040 to 577063, EPI_ISL_577065 to 577067, EPI_ISL_577193 to 577205, EPI_ISL_577207 to 577219, EPI_ISL_577299 to 577307, EPI_ISL_577309 to 577326, EPI_ISL_577328 to 577339, EPI_ISL_577341 to 577345, EPI_ISL_577381 to 577382, EPI_ISL_577385 to 577391, EPI_ISL_577393 to 577400, EPI_ISL_577545 to 577546, EPI_ISL_584169 to 584184, EPI_ISL_584187, EPI_ISL_584193, EPI_ISL_584195, EPI_ISL_584200 to 584206, EPI_ISL_584212 to 584215, EPI_ISL_584809 to 584810, EPI_ISL_595100 to 595114, EPI_ISL_611526, EPI_ISL_611532, EPI_ISL_611535, EPI_ISL_611537 to 611538, EPI_ISL_611555, EPI_ISL_611557, EPI_ISL_611585, EPI_ISL_611589 to 611590, EPI_ISL_611592, EPI_ISL_611638 to 611639, EPI_ISL_611689, EPI_ISL_611754 to 611755, EPI_ISL_611761, EPI_ISL_611771 to 611773, EPI_ISL_611841, EPI_ISL_611916, EPI_ISL_611927 to 611928, EPI_ISL_611933 to 611934, EPI_ISL_611957 to 611960, EPI_ISL_611962, EPI_ISL_611971, EPI_ISL_611983, EPI_ISL_611998, EPI_ISL_612068 to 612069, EPI_ISL_612089, EPI_ISL_612092, EPI_ISL_612094, EPI_ISL_613282 to 613283, EPI_ISL_613286 to 613298, EPI_ISL_613302 to 613306, EPI_ISL_626677 to 626678, EPI_ISL_626684, EPI_ISL_626689 to 626690, EPI_ISL_626738, EPI_ISL_626778, EPI_ISL_626788, EPI_ISL_626792, EPI_ISL_626878 to 626880, EPI_ISL_626895, EPI_ISL_626936, EPI_ISL_627056 to 627057, EPI_ISL_627116, EPI_ISL_627128, EPI_ISL_627144, EPI_ISL_627150, EPI_ISL_628312 to 628333, EPI_ISL_637278 to 637279, EPI_ISL_637305, EPI_ISL_637369 to 637372, EPI_ISL_637387, EPI_ISL_637402, EPI_ISL_637411, EPI_ISL_637432, EPI_ISL_637453, EPI_ISL_637459, EPI_ISL_637466 to 637467, EPI_ISL_637491 to 637499, EPI_ISL_637502, EPI_ISL_637528, EPI_ISL_637610, EPI_ISL_637659, EPI_ISL_637674, EPI_ISL_637714 to 637715, EPI_ISL_637717 to 637720, EPI_ISL_637780 to 637783, EPI_ISL_637853, EPI_ISL_637889, EPI_ISL_637892 to 637921, EPI_ISL_637931 to 637932, EPI_ISL_637949, EPI_ISL_637951, EPI_ISL_637986, EPI_ISL_638002, EPI_ISL_638006, EPI_ISL_638026, EPI_ISL_638050, EPI_ISL_638065, EPI_ISL_638134 to 638137, EPI_ISL_638249 to 638257, EPI_ISL_638265 to 638273, EPI_ISL_638275 to 638292, EPI_ISL_638454 to 638458, EPI_ISL_638911 to 638913, EPI_ISL_639006 to 639007, EPI_ISL_650168 to 650169, EPI_ISL_650221, EPI_ISL_650248 to 650249, EPI_ISL_650379, EPI_ISL_650388, EPI_ISL_650401, EPI_ISL_650566 to 650571, EPI_ISL_650575 to 650578, EPI_ISL_650581, EPI_ISL_650584 to 650585, EPI_ISL_650600 to 650605, EPI_ISL_650608, EPI_ISL_650711, EPI_ISL_650941, EPI_ISL_650947, EPI_ISL_650949, EPI_ISL_650956 to 650957, EPI_ISL_650964 to 650966, EPI_ISL_650980 to 650982, EPI_ISL_651066 to 651069, EPI_ISL_651099, EPI_ISL_651187, EPI_ISL_651277, EPI_ISL_652103 to 652107, EPI_ISL_652109 to 652110, EPI_ISL_652620 to 652626, EPI_ISL_664137, EPI_ISL_664191, EPI_ISL_664302, EPI_ISL_664374 to 664377, EPI_ISL_664492, EPI_ISL_664526, EPI_ISL_664556 to 664559, EPI_ISL_664679, EPI_ISL_664690, EPI_ISL_664746, EPI_ISL_664763, EPI_ISL_664767, EPI_ISL_664840 to 664855, EPI_ISL_665338, EPI_ISL_665347 to 665348, EPI_ISL_665391, EPI_ISL_665487 to 665488, EPI_ISL_665616, EPI_ISL_665625, EPI_ISL_665652, EPI_ISL_665723, EPI_ISL_665726, EPI_ISL_665849, EPI_ISL_666107 to 666109, EPI_ISL_678831, EPI_ISL_679971, EPI_ISL_680016 to 680036, EPI_ISL_680562 to 680570, EPI_ISL_702870, EPI_ISL_723521 to 723557, EPI_ISL_727697 to 727723, EPI_ISL_727734 to 727738, EPI_ISL_727740 to 727750, EPI_ISL_727774 to 727806, EPI_ISL_741348, EPI_ISL_741357 to 741358, EPI_ISL_741658, EPI_ISL_741675, EPI_ISL_741693, EPI_ISL_741697, EPI_ISL_741716 to 741723, EPI_ISL_741759, EPI_ISL_742260, EPI_ISL_763396, EPI_ISL_763407, EPI_ISL_763425, EPI_ISL_763451, EPI_ISL_763465, EPI_ISL_763471, EPI_ISL_763476, EPI_ISL_763495, EPI_ISL_763505, EPI_ISL_763512, EPI_ISL_763516, EPI_ISL_763521, EPI_ISL_763541, EPI_ISL_763550, EPI_ISL_763595, EPI_ISL_763606 to 763612, EPI_ISL_763617, EPI_ISL_763624, EPI_ISL_763659 to 763661, EPI_ISL_763672, EPI_ISL_763676, EPI_ISL_763690, EPI_ISL_763693, EPI_ISL_763734, EPI_ISL_763755, EPI_ISL_763791, EPI_ISL_763798 to 763800, EPI_ISL_763804 to 763806, EPI_ISL_763823 to 763825, EPI_ISL_763827 to 763836, EPI_ISL_763865, EPI_ISL_764007 to 764027, EPI_ISL_764029 to 764030, EPI_ISL_764036, EPI_ISL_764081, EPI_ISL_764094 to 764096, EPI_ISL_764101 to 764102, EPI_ISL_764118 to 764125, EPI_ISL_764136, EPI_ISL_764169, EPI_ISL_764172, EPI_ISL_764193, EPI_ISL_765112 to 765116, EPI_ISL_765119 to 765142, EPI_ISL_765144 to 765148, EPI_ISL_816153, EPI_ISL_816172, EPI_ISL_816174, EPI_ISL_816194 to 816205, EPI_ISL_816207 to 816209, EPI_ISL_816213 to 816215, EPI_ISL_816220 to 816225, EPI_ISL_841759, EPI_ISL_841767, EPI_ISL_841769 to 841775, EPI_ISL_841778, EPI_ISL_841780 to 841784, EPI_ISL_841786 to 841806, EPI_ISL_841808 to 841819, EPI_ISL_841821 to 841848, EPI_ISL_841850, EPI_ISL_841852 to 841861, EPI_ISL_841863 to 841864, EPI_ISL_841866 to 841870, EPI_ISL_841978, EPI_ISL_842004, EPI_ISL_842010 to 842014, EPI_ISL_867930 to 867945, EPI_ISL_867948 to 867967, EPI_ISL_867969 to 867972, EPI_ISL_867974 to 867978, EPI_ISL_867980 to 867981, EPI_ISL_868356 |                                                                                                                                                                                                                     |                                                                                                                                   |                                                                                                                                                                                                                                                                                        |
| see above                                                                                                                                                                                                                                                                                                                                                                                                                                                                                                                                                                                                                                                                                                                                                                                                                                                                                                                                                                                                                                                                                                                                                                                                                                                                                                                                                                                                                                                                                                                                                                                                                                                                                                                                                                                                                                                                                                                                                                                                                                                                                                                                                                                                                                                                                                                                                                                                                                                                                                                                                                                                                                                                                                                                                                                                                                                                                                                                                                                                                                                                                                                                                                                                                                                                                                                                                                                                                                                                                                                                                                                                                                                                                                                                                                                                                                                                                                                                                                                                                                                                                                                                                                                                                                                                                                                                                                                                                                                                                                                                                                                                                                                                                                                                                                                                                                                                                                                                                                                                                                                                                                                                                                                                                                                                                                                                                                                                                                                                                                                                                                                                                                                                                                                                                                                                                                                                                                                                                                                                                                                                                                                                                                                                                                                                                                                                                                                                                                                                                                                                                                                                | Centre for Enzyme Innovation, University of Portsmouth / Translational Research Laboratory, Portsmouth Hospitals NHS Trust                                                                                          | COVID-19 Genomics UK (COG-UK) Consortium                                                                                          | Allyson Lloyd; Angela Beckett; Anoop Chauhan; Ethan Butcher; Garry Scarlett; Kelly Bicknell; Robert Impey; Samuel Robson; Sarah Wyllie; Scott Elliott; Sharon Glaysher; Yann Bourgeois                                                                                                 |
| EPI_ISL_453665                                                                                                                                                                                                                                                                                                                                                                                                                                                                                                                                                                                                                                                                                                                                                                                                                                                                                                                                                                                                                                                                                                                                                                                                                                                                                                                                                                                                                                                                                                                                                                                                                                                                                                                                                                                                                                                                                                                                                                                                                                                                                                                                                                                                                                                                                                                                                                                                                                                                                                                                                                                                                                                                                                                                                                                                                                                                                                                                                                                                                                                                                                                                                                                                                                                                                                                                                                                                                                                                                                                                                                                                                                                                                                                                                                                                                                                                                                                                                                                                                                                                                                                                                                                                                                                                                                                                                                                                                                                                                                                                                                                                                                                                                                                                                                                                                                                                                                                                                                                                                                                                                                                                                                                                                                                                                                                                                                                                                                                                                                                                                                                                                                                                                                                                                                                                                                                                                                                                                                                                                                                                                                                                                                                                                                                                                                                                                                                                                                                                                                                                                                                           | Centre for Enzyme Innovation, University of Portsmouth / Translational Research Laboratory, Portsmouth Hospitals NHS Trust                                                                                          | University of Portsmouth                                                                                                          | Allyson Lloyd; Angela Beckett; Anoop Chauhan; Ethan Butcher; Garry Scarlett; Kelly Bicknell; Robert Impey; Samuel Robson; Sarah Wyllie; Scott Elliott; Sharon Glaysher; Yann Bourgeois                                                                                                 |
| EPI_ISL_413550                                                                                                                                                                                                                                                                                                                                                                                                                                                                                                                                                                                                                                                                                                                                                                                                                                                                                                                                                                                                                                                                                                                                                                                                                                                                                                                                                                                                                                                                                                                                                                                                                                                                                                                                                                                                                                                                                                                                                                                                                                                                                                                                                                                                                                                                                                                                                                                                                                                                                                                                                                                                                                                                                                                                                                                                                                                                                                                                                                                                                                                                                                                                                                                                                                                                                                                                                                                                                                                                                                                                                                                                                                                                                                                                                                                                                                                                                                                                                                                                                                                                                                                                                                                                                                                                                                                                                                                                                                                                                                                                                                                                                                                                                                                                                                                                                                                                                                                                                                                                                                                                                                                                                                                                                                                                                                                                                                                                                                                                                                                                                                                                                                                                                                                                                                                                                                                                                                                                                                                                                                                                                                                                                                                                                                                                                                                                                                                                                                                                                                                                                                                           | Centre for Human and Zoonotic Virology (CHAZVY), College of Medicine University of Lagos/Lagos University Teaching Hospital (LUTH), part of the Laboratory Network of the Nigeria Centre for Disease Control (NCDC) | African Centre of Excellence for Genomics of Infectious Diseases (ACEGID), Redeemer's University, Ede, Osun State, Nigeria        | Ajogbasile F.V.; Folarin O.A.; Ihekweazu C. Hapoi C.T.; Kayode A.; Oguzie J.; Oluniyi P.E.                                                                                                                                                                                             |
| EPI_ISL_508934 to 508936, EPI_ISL_666682 to 666686, EPI_ISL_693391, EPI_ISL_700372 to 700410                                                                                                                                                                                                                                                                                                                                                                                                                                                                                                                                                                                                                                                                                                                                                                                                                                                                                                                                                                                                                                                                                                                                                                                                                                                                                                                                                                                                                                                                                                                                                                                                                                                                                                                                                                                                                                                                                                                                                                                                                                                                                                                                                                                                                                                                                                                                                                                                                                                                                                                                                                                                                                                                                                                                                                                                                                                                                                                                                                                                                                                                                                                                                                                                                                                                                                                                                                                                                                                                                                                                                                                                                                                                                                                                                                                                                                                                                                                                                                                                                                                                                                                                                                                                                                                                                                                                                                                                                                                                                                                                                                                                                                                                                                                                                                                                                                                                                                                                                                                                                                                                                                                                                                                                                                                                                                                                                                                                                                                                                                                                                                                                                                                                                                                                                                                                                                                                                                                                                                                                                                                                                                                                                                                                                                                                                                                                                                                                                                                                                                             | Centre hospitalier Métropole Savoie                                                                                                                                                                                 | CNR Virus des Infections Respiratoires - France SUD                                                                               | Alexandre Gaymard; Antonin Bal; Bruno Lina; Carine Dumollard; Carine Moustaud; Florence Morfin-Sherpa; Gregory Destras; Gwendolynne Burfin; Hadrien Règue; Jérôme Grosjean; Laurence Josset; Martine Valette; Maude Bouscambert-Duchamp; Quentin Semanas; Raphaëlle Lamy; Solenne Brun |
| EPI_ISL_639739                                                                                                                                                                                                                                                                                                                                                                                                                                                                                                                                                                                                                                                                                                                                                                                                                                                                                                                                                                                                                                                                                                                                                                                                                                                                                                                                                                                                                                                                                                                                                                                                                                                                                                                                                                                                                                                                                                                                                                                                                                                                                                                                                                                                                                                                                                                                                                                                                                                                                                                                                                                                                                                                                                                                                                                                                                                                                                                                                                                                                                                                                                                                                                                                                                                                                                                                                                                                                                                                                                                                                                                                                                                                                                                                                                                                                                                                                                                                                                                                                                                                                                                                                                                                                                                                                                                                                                                                                                                                                                                                                                                                                                                                                                                                                                                                                                                                                                                                                                                                                                                                                                                                                                                                                                                                                                                                                                                                                                                                                                                                                                                                                                                                                                                                                                                                                                                                                                                                                                                                                                                                                                                                                                                                                                                                                                                                                                                                                                                                                                                                                                                           | Centre of Nanotechnologies, INCD IMT-Bucuresti (National Institute for Research and Development in Microtechnologies - Bucharest)                                                                                   | Centre of Nanotechnologies, INCD IMT-Bucuresti (National Institute for Research and Development in Microtechnologies - Bucharest) | Gogianu; L. and Baisan, M.; Salceanu, A.                                                                                                                                                                                                                                               |
| EPI_ISL_413647, EPI_ISL_417997 to 417999                                                                                                                                                                                                                                                                                                                                                                                                                                                                                                                                                                                                                                                                                                                                                                                                                                                                                                                                                                                                                                                                                                                                                                                                                                                                                                                                                                                                                                                                                                                                                                                                                                                                                                                                                                                                                                                                                                                                                                                                                                                                                                                                                                                                                                                                                                                                                                                                                                                                                                                                                                                                                                                                                                                                                                                                                                                                                                                                                                                                                                                                                                                                                                                                                                                                                                                                                                                                                                                                                                                                                                                                                                                                                                                                                                                                                                                                                                                                                                                                                                                                                                                                                                                                                                                                                                                                                                                                                                                                                                                                                                                                                                                                                                                                                                                                                                                                                                                                                                                                                                                                                                                                                                                                                                                                                                                                                                                                                                                                                                                                                                                                                                                                                                                                                                                                                                                                                                                                                                                                                                                                                                                                                                                                                                                                                                                                                                                                                                                                                                                                                                 | Centro Hospital do Porto, E.P.E. - H. Geral de Santo Antonio                                                                                                                                                        | Instituto Nacional de Saude (INSA)                                                                                                | Guimar et al; Helena Ramos; Inês Costa; Joana Isidro; Joana Mendonça; João Paulo Gomes; Luis Vieira; Pedro Pechirra; Raquel Guimar; Vitor Borges                                                                                                                                       |
| EPI_ISL_417986 to 417987, EPI_ISL_417989                                                                                                                                                                                                                                                                                                                                                                                                                                                                                                                                                                                                                                                                                                                                                                                                                                                                                                                                                                                                                                                                                                                                                                                                                                                                                                                                                                                                                                                                                                                                                                                                                                                                                                                                                                                                                                                                                                                                                                                                                                                                                                                                                                                                                                                                                                                                                                                                                                                                                                                                                                                                                                                                                                                                                                                                                                                                                                                                                                                                                                                                                                                                                                                                                                                                                                                                                                                                                                                                                                                                                                                                                                                                                                                                                                                                                                                                                                                                                                                                                                                                                                                                                                                                                                                                                                                                                                                                                                                                                                                                                                                                                                                                                                                                                                                                                                                                                                                                                                                                                                                                                                                                                                                                                                                                                                                                                                                                                                                                                                                                                                                                                                                                                                                                                                                                                                                                                                                                                                                                                                                                                                                                                                                                                                                                                                                                                                                                                                                                                                                                                                 | Centro Hospitalar e Universitario de Sao Joao, Porto                                                                                                                                                                | Instituto Nacional de Saude (INSA)                                                                                                | Guimar et al                                                                                                                                                                                                                                                                           |
| EPI_ISL_413648                                                                                                                                                                                                                                                                                                                                                                                                                                                                                                                                                                                                                                                                                                                                                                                                                                                                                                                                                                                                                                                                                                                                                                                                                                                                                                                                                                                                                                                                                                                                                                                                                                                                                                                                                                                                                                                                                                                                                                                                                                                                                                                                                                                                                                                                                                                                                                                                                                                                                                                                                                                                                                                                                                                                                                                                                                                                                                                                                                                                                                                                                                                                                                                                                                                                                                                                                                                                                                                                                                                                                                                                                                                                                                                                                                                                                                                                                                                                                                                                                                                                                                                                                                                                                                                                                                                                                                                                                                                                                                                                                                                                                                                                                                                                                                                                                                                                                                                                                                                                                                                                                                                                                                                                                                                                                                                                                                                                                                                                                                                                                                                                                                                                                                                                                                                                                                                                                                                                                                                                                                                                                                                                                                                                                                                                                                                                                                                                                                                                                                                                                                                           | Centro Hospitalar e Universitario de Sao Joao, Porto                                                                                                                                                                | Instituto Nacional de Saude (INSA)                                                                                                | Inês Costa; Joana Isidro; Joana Mendonça; João Paulo Gomes; João Tiago Guimarães; Luis Vieira; Pedro Pechirra; Raquel Guimar; Vitor Borges                                                                                                                                             |
| EPI_ISL_468761 to 468764, EPI_ISL_500369 to 500372, EPI_ISL_500374 to 500381, EPI_ISL_500383, EPI_ISL_500386 to 500394, EPI_ISL_500396 to 500401, EPI_ISL_500403 to 500411, EPI_ISL_500413, EPI_ISL_500415 to 500417, EPI_ISL_500419, EPI_ISL_500421 to 500435, EPI_ISL_500438 to 500442, EPI_ISL_500444 to 500458, EPI_ISL_537382 to 537400, EPI_ISL_537402 to 537420, EPI_ISL_537423 to 537437, EPI_ISL_537439 to 537444, EPI_ISL_537447 to 537449, EPI_ISL_537452 to 537455, EPI_ISL_537457 to 537464, EPI_ISL_537466, EPI_ISL_537811 to 537833, EPI_ISL_537835 to 537847, EPI_ISL_537849 to 537852, EPI_ISL_537854 to 537866, EPI_ISL_537868, EPI_ISL_537871 to 537873, EPI_ISL_732748 to 732753, EPI_ISL_732755 to 732759, EPI_ISL_732761 to 732764, EPI_ISL_732766 to 732777, EPI_ISL_732780, EPI_ISL_732783, EPI_ISL_732785 to 732789, EPI_ISL_732793 to 732801, EPI_ISL_732804 to 732808, EPI_ISL_732810, EPI_ISL_732813 to 732814, EPI_ISL_732816 to 732818                                                                                                                                                                                                                                                                                                                                                                                                                                                                                                                                                                                                                                                                                                                                                                                                                                                                                                                                                                                                                                                                                                                                                                                                                                                                                                                                                                                                                                                                                                                                                                                                                                                                                                                                                                                                                                                                                                                                                                                                                                                                                                                                                                                                                                                                                                                                                                                                                                                                                                                                                                                                                                                                                                                                                                                                                                                                                                                                                                                                                                                                                                                                                                                                                                                                                                                                                                                                                                                                                                                                                                                                                                                                                                                                                                                                                                                                                                                                                                                                                                                                                                                                                                                                                                                                                                                                                                                                                                                                                                                                                                                                                                                                                                                                                                                                                                                                                                                                                                                                                                                                                                                                                                                                                                                                                                                                                                                                                                                                                                                                                                                                                                     |                                                                                                                                                                                                                     |                                                                                                                                   |                                                                                                                                                                                                                                                                                        |
| see above                                                                                                                                                                                                                                                                                                                                                                                                                                                                                                                                                                                                                                                                                                                                                                                                                                                                                                                                                                                                                                                                                                                                                                                                                                                                                                                                                                                                                                                                                                                                                                                                                                                                                                                                                                                                                                                                                                                                                                                                                                                                                                                                                                                                                                                                                                                                                                                                                                                                                                                                                                                                                                                                                                                                                                                                                                                                                                                                                                                                                                                                                                                                                                                                                                                                                                                                                                                                                                                                                                                                                                                                                                                                                                                                                                                                                                                                                                                                                                                                                                                                                                                                                                                                                                                                                                                                                                                                                                                                                                                                                                                                                                                                                                                                                                                                                                                                                                                                                                                                                                                                                                                                                                                                                                                                                                                                                                                                                                                                                                                                                                                                                                                                                                                                                                                                                                                                                                                                                                                                                                                                                                                                                                                                                                                                                                                                                                                                                                                                                                                                                                                                | Centro de Investigación Biomédica de La Rioja - Hospital San Pedro Logroño                                                                                                                                          | SeqCOVID-SPAIN consortium/IBV(CSIC)                                                                                               | José Manuel Azcona Gutiérrez; María Pilar Bea Escudero; María de Toro; Miriam Blasco Alberdi and SeqCOVID-SPAIN consortium                                                                                                                                                             |
| EPI_ISL_450520 to 450524, EPI_ISL_639632 to 639633, EPI_ISL_639636, EPI_ISL_639640, EPI_ISL_639642, EPI_ISL_639648, EPI_ISL_639650 to 639651, EPI_ISL_639654 to 639657, EPI_ISL_639663, EPI_ISL_639672, EPI_ISL_639676 to 639680, EPI_ISL_639683, EPI_ISL_770038 to 770039, EPI_ISL_770042, EPI_ISL_770045, EPI_ISL_770048 to 770049, EPI_ISL_770052, EPI_ISL_770054, EPI_ISL_770056, EPI_ISL_770058 to 770059, EPI_ISL_770061                                                                                                                                                                                                                                                                                                                                                                                                                                                                                                                                                                                                                                                                                                                                                                                                                                                                                                                                                                                                                                                                                                                                                                                                                                                                                                                                                                                                                                                                                                                                                                                                                                                                                                                                                                                                                                                                                                                                                                                                                                                                                                                                                                                                                                                                                                                                                                                                                                                                                                                                                                                                                                                                                                                                                                                                                                                                                                                                                                                                                                                                                                                                                                                                                                                                                                                                                                                                                                                                                                                                                                                                                                                                                                                                                                                                                                                                                                                                                                                                                                                                                                                                                                                                                                                                                                                                                                                                                                                                                                                                                                                                                                                                                                                                                                                                                                                                                                                                                                                                                                                                                                                                                                                                                                                                                                                                                                                                                                                                                                                                                                                                                                                                                                                                                                                                                                                                                                                                                                                                                                                                                                                                                                           |                                                                                                                                                                                                                     |                                                                                                                                   |                                                                                                                                                                                                                                                                                        |
| see above                                                                                                                                                                                                                                                                                                                                                                                                                                                                                                                                                                                                                                                                                                                                                                                                                                                                                                                                                                                                                                                                                                                                                                                                                                                                                                                                                                                                                                                                                                                                                                                                                                                                                                                                                                                                                                                                                                                                                                                                                                                                                                                                                                                                                                                                                                                                                                                                                                                                                                                                                                                                                                                                                                                                                                                                                                                                                                                                                                                                                                                                                                                                                                                                                                                                                                                                                                                                                                                                                                                                                                                                                                                                                                                                                                                                                                                                                                                                                                                                                                                                                                                                                                                                                                                                                                                                                                                                                                                                                                                                                                                                                                                                                                                                                                                                                                                                                                                                                                                                                                                                                                                                                                                                                                                                                                                                                                                                                                                                                                                                                                                                                                                                                                                                                                                                                                                                                                                                                                                                                                                                                                                                                                                                                                                                                                                                                                                                                                                                                                                                                                                                | Centrl Laboratorija                                                                                                                                                                                                 | Latvian Biomedical Research and Study Centre                                                                                      | Ivars Silamielis; Jana Oste; Jnis Kloviš; Jnis Pjalkovskis; Kaspars Megnis; Marta Priedte; Monta Ustinova; Stella Lapia; Uga Dumpis; Vita Rovte; ikita Zrelavs                                                                                                                         |
| EPI_ISL_486390 to 486391, EPI_ISL_486411 to 486416, EPI_ISL_486418 to 486421, EPI_ISL_486437, EPI_ISL_492988 to 492992, EPI_ISL_501286 to 501289, EPI_ISL_501808, EPI_ISL_501817, EPI_ISL_501895 to 501896, EPI_ISL_501915, EPI_ISL_501922, EPI_ISL_515196, EPI_ISL_534200 to 534202, EPI_ISL_534206 to 534208, EPI_ISL_534210 to 534211, EPI_ISL_534220, EPI_ISL_534222 to 534223                                                                                                                                                                                                                                                                                                                                                                                                                                                                                                                                                                                                                                                                                                                                                                                                                                                                                                                                                                                                                                                                                                                                                                                                                                                                                                                                                                                                                                                                                                                                                                                                                                                                                                                                                                                                                                                                                                                                                                                                                                                                                                                                                                                                                                                                                                                                                                                                                                                                                                                                                                                                                                                                                                                                                                                                                                                                                                                                                                                                                                                                                                                                                                                                                                                                                                                                                                                                                                                                                                                                                                                                                                                                                                                                                                                                                                                                                                                                                                                                                                                                                                                                                                                                                                                                                                                                                                                                                                                                                                                                                                                                                                                                                                                                                                                                                                                                                                                                                                                                                                                                                                                                                                                                                                                                                                                                                                                                                                                                                                                                                                                                                                                                                                                                                                                                                                                                                                                                                                                                                                                                                                                                                                                                                       |                                                                                                                                                                                                                     |                                                                                                                                   |                                                                                                                                                                                                                                                                                        |
| see above                                                                                                                                                                                                                                                                                                                                                                                                                                                                                                                                                                                                                                                                                                                                                                                                                                                                                                                                                                                                                                                                                                                                                                                                                                                                                                                                                                                                                                                                                                                                                                                                                                                                                                                                                                                                                                                                                                                                                                                                                                                                                                                                                                                                                                                                                                                                                                                                                                                                                                                                                                                                                                                                                                                                                                                                                                                                                                                                                                                                                                                                                                                                                                                                                                                                                                                                                                                                                                                                                                                                                                                                                                                                                                                                                                                                                                                                                                                                                                                                                                                                                                                                                                                                                                                                                                                                                                                                                                                                                                                                                                                                                                                                                                                                                                                                                                                                                                                                                                                                                                                                                                                                                                                                                                                                                                                                                                                                                                                                                                                                                                                                                                                                                                                                                                                                                                                                                                                                                                                                                                                                                                                                                                                                                                                                                                                                                                                                                                                                                                                                                                                                | Centrl laboratorija                                                                                                                                                                                                 | Latvian Biomedical Research and Study Centre                                                                                      | Ivars Silamielis; Jana Oste; Jnis Kloviš; Jnis Pjalkovskis; Kaspars Megnis; Marta Priedte; Monta Ustinova; Stella Lapia; Uga Dumpis; Vita Rovte; ikita Zrelavs                                                                                                                         |
| EPI_ISL_802994 to 802995                                                                                                                                                                                                                                                                                                                                                                                                                                                                                                                                                                                                                                                                                                                                                                                                                                                                                                                                                                                                                                                                                                                                                                                                                                                                                                                                                                                                                                                                                                                                                                                                                                                                                                                                                                                                                                                                                                                                                                                                                                                                                                                                                                                                                                                                                                                                                                                                                                                                                                                                                                                                                                                                                                                                                                                                                                                                                                                                                                                                                                                                                                                                                                                                                                                                                                                                                                                                                                                                                                                                                                                                                                                                                                                                                                                                                                                                                                                                                                                                                                                                                                                                                                                                                                                                                                                                                                                                                                                                                                                                                                                                                                                                                                                                                                                                                                                                                                                                                                                                                                                                                                                                                                                                                                                                                                                                                                                                                                                                                                                                                                                                                                                                                                                                                                                                                                                                                                                                                                                                                                                                                                                                                                                                                                                                                                                                                                                                                                                                                                                                                                                 | Charite Universitätsmedizin Berlin, Institut für Virologie, Charitéplatz 1, 10117 Berlin, Germany                                                                                                                   | Charite Universitätsmedizin Berlin, Institut für Virologie, Charitéplatz 1, 10117 Berlin, Germany                                 | Barbara Muhlemann; Christian Drosten; Julia Schneider; Julia Tesch; Jörn Beheim-Schwarzbach; Talitha Veith; Terry Jones; Tobias Bleicker; Victor M Corman                                                                                                                              |
| EPI_ISL_516629 to 516638, EPI_ISL_516640 to 516645                                                                                                                                                                                                                                                                                                                                                                                                                                                                                                                                                                                                                                                                                                                                                                                                                                                                                                                                                                                                                                                                                                                                                                                                                                                                                                                                                                                                                                                                                                                                                                                                                                                                                                                                                                                                                                                                                                                                                                                                                                                                                                                                                                                                                                                                                                                                                                                                                                                                                                                                                                                                                                                                                                                                                                                                                                                                                                                                                                                                                                                                                                                                                                                                                                                                                                                                                                                                                                                                                                                                                                                                                                                                                                                                                                                                                                                                                                                                                                                                                                                                                                                                                                                                                                                                                                                                                                                                                                                                                                                                                                                                                                                                                                                                                                                                                                                                                                                                                                                                                                                                                                                                                                                                                                                                                                                                                                                                                                                                                                                                                                                                                                                                                                                                                                                                                                                                                                                                                                                                                                                                                                                                                                                                                                                                                                                                                                                                                                                                                                                                                       | Charite Universitätsmedizin Berlin, Institut für Virologie/Labor Berlin                                                                                                                                             | Charite Universitätsmedizin Berlin, Institut für Virologie/Labor Berlin                                                           | Barbara Muhlemann; Christian Drosten; Julia Schneider; Jörn Beheim-Schwarzbach; Talitha Veith; Terry Jones; Victor M Corman                                                                                                                                                            |
| EPI_ISL_862125, EPI_ISL_862127 to 862128, EPI_ISL_862132, EPI_ISL_862137 to 862138, EPI_ISL_862145, EPI_ISL_862159                                                                                                                                                                                                                                                                                                                                                                                                                                                                                                                                                                                                                                                                                                                                                                                                                                                                                                                                                                                                                                                                                                                                                                                                                                                                                                                                                                                                                                                                                                                                                                                                                                                                                                                                                                                                                                                                                                                                                                                                                                                                                                                                                                                                                                                                                                                                                                                                                                                                                                                                                                                                                                                                                                                                                                                                                                                                                                                                                                                                                                                                                                                                                                                                                                                                                                                                                                                                                                                                                                                                                                                                                                                                                                                                                                                                                                                                                                                                                                                                                                                                                                                                                                                                                                                                                                                                                                                                                                                                                                                                                                                                                                                                                                                                                                                                                                                                                                                                                                                                                                                                                                                                                                                                                                                                                                                                                                                                                                                                                                                                                                                                                                                                                                                                                                                                                                                                                                                                                                                                                                                                                                                                                                                                                                                                                                                                                                                                                                                                                       | Charité Universitätsmedizin Berlin, Institut für Virologie/Labor Berlin                                                                                                                                             | Charité Universitätsmedizin Berlin, Institut für Virologie                                                                        | Barbara Muhlemann; Christian Drosten; Julia Schneider; Julia Tesch; Jörn Beheim-Schwarzbach; Talitha Veith; Terry Jones; Tobias Bleicker; Victor M Corman                                                                                                                              |

|                                                                                                                                                                                                                                                                                                                                                                                                                                                                                                                                                                                                                                                                                                                                                                                                                                                                                          |                                                                                                              |                                                                                                                         |                                                                                                                                                                                                                                                                                                                            |
|------------------------------------------------------------------------------------------------------------------------------------------------------------------------------------------------------------------------------------------------------------------------------------------------------------------------------------------------------------------------------------------------------------------------------------------------------------------------------------------------------------------------------------------------------------------------------------------------------------------------------------------------------------------------------------------------------------------------------------------------------------------------------------------------------------------------------------------------------------------------------------------|--------------------------------------------------------------------------------------------------------------|-------------------------------------------------------------------------------------------------------------------------|----------------------------------------------------------------------------------------------------------------------------------------------------------------------------------------------------------------------------------------------------------------------------------------------------------------------------|
| EPI_ISL_754174 to 754175                                                                                                                                                                                                                                                                                                                                                                                                                                                                                                                                                                                                                                                                                                                                                                                                                                                                 | Charité Universitätsmedizin Berlin, Institut für Virologie                                                   | Charité Universitätsmedizin Berlin, Institut für Virologie                                                              | Barbara Mühlemann; Christian Drosten; Julia Schneider; Jörn Beheim-Schwarzbach; Talitha Veith; Terry Jones; Victor M Corman                                                                                                                                                                                                |
| EPI_ISL_729346, EPI_ISL_729348, EPI_ISL_729355 to 729357, EPI_ISL_729360, EPI_ISL_729365 to 729366, EPI_ISL_729370, EPI_ISL_729377, EPI_ISL_729382, EPI_ISL_729387 to 729388, EPI_ISL_729398, EPI_ISL_729400, EPI_ISL_729405 to 729406, EPI_ISL_729408 to 729410, EPI_ISL_729413, EPI_ISL_729473 to 729497, EPI_ISL_729499, EPI_ISL_729514, EPI_ISL_729529 to 729534, EPI_ISL_729529 to 729556, EPI_ISL_729558, EPI_ISL_729598 to 729607, EPI_ISL_753702 to 753712, EPI_ISL_753714 to 753715, EPI_ISL_753717 to 753721, EPI_ISL_753723 to 753727, EPI_ISL_753729 to 753739, EPI_ISL_753741 to 753747, EPI_ISL_753749 to 753762, EPI_ISL_753764 to 753765, EPI_ISL_753767 to 753769, EPI_ISL_753771 to 753800, EPI_ISL_753802 to 753813, EPI_ISL_753815 to 753921, EPI_ISL_753923 to 754058, EPI_ISL_754185 to 754194, EPI_ISL_806526 to 806542, EPI_ISL_853401 to 853404, EPI_ISL_869118 | Charité Universitätsmedizin Berlin, Institut für Virologie/Labor Berlin                                      | Charité Universitätsmedizin Berlin, Institut für Virologie                                                              | Barbara Mühlemann; Christian Drosten; Cornelia Schlee; Julia Schneider; Julia Tesch; Jörn Beheim-Schwarzbach; Talitha Veith; Terry Jones; Tobias Bleicker; Tomasz Zemojtel; Victor M Corman                                                                                                                                |
| see above                                                                                                                                                                                                                                                                                                                                                                                                                                                                                                                                                                                                                                                                                                                                                                                                                                                                                | Charité Universitätsmedizin Berlin, Institute of Virology, Charitéplatz 1, 10117 Berlin, Germany             | Charité Universitätsmedizin Berlin, Institute of Virology, Charitéplatz 1, 10117 Berlin, Germany                        | Barbara Mühlemann; Christian Drosten; Julia Schneider; Jörn Beheim-Schwarzbach; Talitha Veith; Terry Jones; Victor M Corman                                                                                                                                                                                                |
| EPI_ISL_818342                                                                                                                                                                                                                                                                                                                                                                                                                                                                                                                                                                                                                                                                                                                                                                                                                                                                           | Charité Universitätsmedizin Berlin, Institute of Virology, Charitéplatz 1, 10117 Berlin, Germany             | Charité Universitätsmedizin Berlin, Institute of Virology, Charitéplatz 1, 10117 Berlin, Germany                        | Barbara Mühlemann; Christian Drosten; Julia Schneider; Jörn Beheim-Schwarzbach; Talitha Veith; Terry Jones; Victor M Corman                                                                                                                                                                                                |
| EPI_ISL_824920 to 824921, EPI_ISL_824942, EPI_ISL_824944, EPI_ISL_856680 to 856681, EPI_ISL_856683, EPI_ISL_868949                                                                                                                                                                                                                                                                                                                                                                                                                                                                                                                                                                                                                                                                                                                                                                       | Charité Universitätsmedizin Berlin, Institute of Virology; Institut für Mikrobiologie der Bundeswehr, Munich | Charité Universitätsmedizin Berlin, Institute of Virology                                                               | Barbara Mühlemann; Christian Drosten; Julia Schneider; Markus Antwerpen; Roman Wölfel; Talitha Veith; Victor M Corman                                                                                                                                                                                                      |
| EPI_ISL_406862                                                                                                                                                                                                                                                                                                                                                                                                                                                                                                                                                                                                                                                                                                                                                                                                                                                                           | Charité Universitätsmedizin Berlin, Institute of Virology; Institut für Mikrobiologie der Bundeswehr, Munich | Charité Universitätsmedizin Berlin, Institute of Virology                                                               | Barbara Mühlemann; Christian Drosten; Julia Schneider; Markus Antwerpen; Roman Wölfel; Talitha Veith; Victor M Corman                                                                                                                                                                                                      |
| EPI_ISL_872100 to 872103                                                                                                                                                                                                                                                                                                                                                                                                                                                                                                                                                                                                                                                                                                                                                                                                                                                                 | Chu Tivoli                                                                                                   | GIGA Medical Genomics                                                                                                   | Bouchra Boujemla; Cécile Meex; Keith Durkin; Maria Artesi; Marie-Pierre Hayette; Pierrette Melin; Raphaël Boreux; Sébastien Bontems; Vincent Bours                                                                                                                                                                         |
| EPI_ISL_443315                                                                                                                                                                                                                                                                                                                                                                                                                                                                                                                                                                                                                                                                                                                                                                                                                                                                           | Château de la Source                                                                                         | National Reference Center for Viruses of Respiratory Infections, Institut Pasteur, Paris                                | Angela Brisebarre; Etienne Simon-Lorière; Flora Donati; Marion Barbet; Maud Vanpeene; Mélanie Albert; Méline Bizard; Sylvie Behillil; Sylvie van der Werf; Vincent Enouf                                                                                                                                                   |
| EPI_ISL_491115                                                                                                                                                                                                                                                                                                                                                                                                                                                                                                                                                                                                                                                                                                                                                                                                                                                                           | Cicin-Sain Lab                                                                                               | Cicin-Sain Lab                                                                                                          | Kathrin Eschke; Luka Cicin-Sain; M. Zeeshan Chaudhry; Yeonsu Kim                                                                                                                                                                                                                                                           |
| EPI_ISL_462450 to 462476                                                                                                                                                                                                                                                                                                                                                                                                                                                                                                                                                                                                                                                                                                                                                                                                                                                                 | Clinical Center, University of Sarajevo                                                                      | Charite Universitatsmedizin Berlin, Institute of Virology                                                               | Almedina Hadzihasanovic-Moro; Amela Dedic-Ljubovic; Barbara Muehlemann; Christian Drosten; Irma Salimovic-Besic; Jörn Beheim-Schwarzbach; Julia Schneider; Selma Mutevelic; Suzana Arapcic; Talitha Veith; Terry Jones; Victor M Corman                                                                                    |
| EPI_ISL_677715, EPI_ISL_677718                                                                                                                                                                                                                                                                                                                                                                                                                                                                                                                                                                                                                                                                                                                                                                                                                                                           | Clinical Hospital - Bitola                                                                                   | Research Center for Genetic Engineering and Biotechnology "Georgi D. Efremov" , Macedonian Academy of Sciences and Arts | RCGEB - MASA                                                                                                                                                                                                                                                                                                               |
| EPI_ISL_516426 to 516431, EPI_ISL_677676 to 677677, EPI_ISL_677716 to 677717, EPI_ISL_677720 to 677721, EPI_ISL_677724, EPI_ISL_678250, EPI_ISL_678259                                                                                                                                                                                                                                                                                                                                                                                                                                                                                                                                                                                                                                                                                                                                   | Clinical Hospital - Shtip                                                                                    | Research Center for Genetic Engineering and Biotechnology "Georgi D. Efremov" , Macedonian Academy of Sciences and Arts | RCGEB - MASA                                                                                                                                                                                                                                                                                                               |
| see above                                                                                                                                                                                                                                                                                                                                                                                                                                                                                                                                                                                                                                                                                                                                                                                                                                                                                | Clinical Microbiology Laboratory- Basurto University Hospita                                                 | Biocruces-Bizkaia                                                                                                       | Ana Belén Belén de la Hoz; Estibaliz Ugalde-Zarraga; José Luis Díaz de Tuesta del Arco; Matxalen Vidal-García; Mikel J. Urrutikoetxea-Gutierrez; M <sup>o</sup> Carmen Nieto Toboso                                                                                                                                        |
| EPI_ISL_483570                                                                                                                                                                                                                                                                                                                                                                                                                                                                                                                                                                                                                                                                                                                                                                                                                                                                           | Clinical Microbiology Laboratory- Basurto University Hospital                                                | Biocruces-Bizkaia                                                                                                       | Ana Belén Belén de la Hoz; Estibaliz Ugalde-Zarraga; José Luis Díaz de Tuesta del Arco; Matxalen Vidal-García; Mikel J. Urrutikoetxea-Gutierrez; M <sup>o</sup> Carmen Nieto Toboso                                                                                                                                        |
| EPI_ISL_483566, EPI_ISL_483571 to 483573, EPI_ISL_486876, EPI_ISL_489833 to 489835, EPI_ISL_490202 to 490204, EPI_ISL_490977                                                                                                                                                                                                                                                                                                                                                                                                                                                                                                                                                                                                                                                                                                                                                             | Clinical Pathology and Microbiology, San Gallicano Dermatologic Institute IRCCS                              | National Institute for Infectious Diseases, INMI, "L. Spallanzani" IRCCS                                                | A. Di Caro; B. Bartolini; C.E.M Gruber; E. Giombini; F. Carletti; F. Ensoli; F. Messina; F. Pimpinelli; M. Rueca; M.R. Capobianchi                                                                                                                                                                                         |
| EPI_ISL_735511                                                                                                                                                                                                                                                                                                                                                                                                                                                                                                                                                                                                                                                                                                                                                                                                                                                                           | Clinique AVERAY LA BROUSTE, Med. Polyvalente                                                                 | National Reference Center for Viruses of Respiratory Infections, Institut Pasteur, Paris                                | Angela Brisebarre; Elsa Ngwem; Etienne Simon-Lorière; Flora Donati; Marion Barbet; Maud Vanpeene; Mélanie Albert; Méline Bizard; Sylvie Behillil; Sylvie van der Werf; Vincent Enouf                                                                                                                                       |
| EPI_ISL_418230                                                                                                                                                                                                                                                                                                                                                                                                                                                                                                                                                                                                                                                                                                                                                                                                                                                                           | Clinica Universidad de Navarra                                                                               | Instituto de Salud Carlos III                                                                                           | A. Monzón; F. Casas; I. Fernández, M.; I. Jiménez; Iglesias-Caballero; M. Pozo; M. Cuesta; M. González-Esguevillas; M. Zaballos; M.Camarero; P. Jiménez; S. Juliá; S. Molinero Calamita; S. Varona                                                                                                                         |
| EPI_ISL_862652 to 862653                                                                                                                                                                                                                                                                                                                                                                                                                                                                                                                                                                                                                                                                                                                                                                                                                                                                 | SeqCOVID-SPAIN consortium/IBV(CSIC)                                                                          | Jose Luis del Pozo and SeqCOVID-SPAIN consortium; Mirian Fernández-Alonso                                               |                                                                                                                                                                                                                                                                                                                            |
| EPI_ISL_452473 to 452474, EPI_ISL_452476 to 452515, EPI_ISL_452517 to 452543, EPI_ISL_538082, EPI_ISL_538084 to 538098, EPI_ISL_538100 to 538104, EPI_ISL_538107 to 538117, EPI_ISL_538608 to 538612                                                                                                                                                                                                                                                                                                                                                                                                                                                                                                                                                                                                                                                                                     | Clinica Universidad de Navarra. Servicio de Enfermedades Infecciosas y Microbiología clínica                 | SeqCOVID-SPAIN consortium/IBV(CSIC)                                                                                     | Jose Luis del Pozo and SeqCOVID-SPAIN consortium; Mirian Fernández-Alonso                                                                                                                                                                                                                                                  |
| see above                                                                                                                                                                                                                                                                                                                                                                                                                                                                                                                                                                                                                                                                                                                                                                                                                                                                                | Complejo Hospitalario Universitario La Coruna                                                                | Instituto de Salud Carlos III                                                                                           | A. Monzón; F. Casas; I. Alonso, P.; I. Jiménez; Iglesias-Caballero; M. Pozo; M. Cuesta; M. González-Esguevillas; M. Zaballos; M.Camarero; P. Jiménez; S. Juliá; S. Molinero Calamita; S. Varona                                                                                                                            |
| EPI_ISL_862544, EPI_ISL_862553 to 862555                                                                                                                                                                                                                                                                                                                                                                                                                                                                                                                                                                                                                                                                                                                                                                                                                                                 | Complejo Hospitalario Universitario de Albacete                                                              | Instituto de Salud Carlos III                                                                                           | A. Monzón; F. Casas; I. I. Jiménez; Iglesias-Caballero; J. López; M. Camarero; M. Cuesta; M. González-Esguevillas; M. Molinero Calamita; M. Zaballos; M.A Canizares; M.I Paz; P. Jiménez; S. Juliá; S. Pozo; S. Varona                                                                                                     |
| EPI_ISL_455328 to 455331, EPI_ISL_539563 to 539564, EPI_ISL_578194                                                                                                                                                                                                                                                                                                                                                                                                                                                                                                                                                                                                                                                                                                                                                                                                                       | Complejo Hospitalario Universitario de Albacete                                                              | Instituto de Salud Carlos III                                                                                           | A. Monzón; F. Casas; I. Jiménez; I. Martínez, E.; Iglesias-Caballero; M. Camarero; M. Cuesta; M. González-Esguevillas; M. Pozo; M. Zaballos; P. Jiménez; S. Juliá; S. Molinero Calamita; S. Varona                                                                                                                         |
| EPI_ISL_691684                                                                                                                                                                                                                                                                                                                                                                                                                                                                                                                                                                                                                                                                                                                                                                                                                                                                           | Complejo Hospitalario Universitario de Albacete                                                              | SeqCOVID-SPAIN consortium/IBV(CSIC)                                                                                     | Caridad Sainz de Baranda Camino and SeqCOVID-SPAIN consortium; Encarnacion Simarro Córdoba; Julia Lozano Serra; Lorena Robles Fonseca; Monica Parra Grandes                                                                                                                                                                |
| EPI_ISL_474798, EPI_ISL_474800 to 474813, EPI_ISL_474815 to 474820, EPI_ISL_474822 to 474831, EPI_ISL_474837 to 474838, EPI_ISL_474840, EPI_ISL_474847 to 474849, EPI_ISL_474853, EPI_ISL_474901 to 474904, EPI_ISL_474919, EPI_ISL_474921, EPI_ISL_474933, EPI_ISL_474940 to 474941, EPI_ISL_474946, EPI_ISL_474951 to 474955, EPI_ISL_500157 to 500159, EPI_ISL_500166, EPI_ISL_500207, EPI_ISL_500218                                                                                                                                                                                                                                                                                                                                                                                                                                                                                 | Complejo Hospitalario Universitario de Albacete                                                              | Instituto de Salud Carlos III                                                                                           | A. Monzón; F. Casas; I. I. Jiménez; Iglesias-Caballero; J. Llovo; M. Camarero; M. Cuesta; M. González-Esguevillas; M. Molinero Calamita; M. Zaballos; P. Jiménez; S. Juliá; S. Pozo; S. Varona                                                                                                                             |
| see above                                                                                                                                                                                                                                                                                                                                                                                                                                                                                                                                                                                                                                                                                                                                                                                                                                                                                | Complejo Hospitalario Universitario de Vigo                                                                  | SeqCOVID-SPAIN consortium/IBV(CSIC)                                                                                     | Benito Regueiro and SeqCOVID-SPAIN consortium                                                                                                                                                                                                                                                                              |
| EPI_ISL_455333                                                                                                                                                                                                                                                                                                                                                                                                                                                                                                                                                                                                                                                                                                                                                                                                                                                                           | Complejo Hospitalario de Navarra                                                                             | Instituto de Salud Carlos III                                                                                           | A. Monzón; F. Casas; I. I. Ezpeleta, C.; I. Jiménez; Iglesias-Caballero; J. López; M. Pozo; M. Camarero; M. Cuesta; M. González-Esguevillas; M. Molinero Calamita; M. Zaballos; M.Camarero; P. Jiménez; S. Juliá; S. Molinero Calamita; S. Pozo; S. Varona                                                                 |
| EPI_ISL_537380 to 537381                                                                                                                                                                                                                                                                                                                                                                                                                                                                                                                                                                                                                                                                                                                                                                                                                                                                 | Complejo Hospitalario Universitario de Orense                                                                | Instituto de Salud Carlos III                                                                                           | A. Monzón; F. Casas; I. I. Jiménez; Iglesias-Caballero; M. Camarero; M. Cuesta; M. García; M. González-Esguevillas; M. Molinero Calamita; M. Paz; M. Zaballos; P. Jiménez; S. Juliá; S. Pozo; S. Varona                                                                                                                    |
| EPI_ISL_539569 to 539572, EPI_ISL_862550, EPI_ISL_862552, EPI_ISL_862570 to 862572, EPI_ISL_862645 to 862651                                                                                                                                                                                                                                                                                                                                                                                                                                                                                                                                                                                                                                                                                                                                                                             | Consejería de Sanidad y Asuntos Sociales                                                                     | Instituto de Salud Carlos III                                                                                           | A. Monzón; F. Casas; G. Gutiérrez; I. I. Gutiérrez, G.; I. Jiménez; Iglesias-Caballero; M. Camarero; M. Cuesta; M. González-Esguevillas; M. Molinero Calamita; M. Pozo; M. Zaballos; P. Jiménez; S. Juliá; S. Molinero Calamita; S. Pozo; S. Varona                                                                        |
| EPI_ISL_455327, EPI_ISL_539526 to 539529, EPI_ISL_691681                                                                                                                                                                                                                                                                                                                                                                                                                                                                                                                                                                                                                                                                                                                                                                                                                                 | Consejería de Sanidad y Asuntos Sociales                                                                     | Instituto de Salud Carlos III                                                                                           | A. Monzón; F. Casas; I. Gutiérrez, G.; I. Jiménez; Iglesias-Caballero; M. Camarero; M. Cuesta; M. González-Esguevillas; M. Pozo; M. Zaballos; P. Jiménez; S. Juliá; S. Molinero Calamita; S. Varona                                                                                                                        |
| EPI_ISL_862546 to 862547, EPI_ISL_862557 to 862563, EPI_ISL_862566, EPI_ISL_862641 to 862644                                                                                                                                                                                                                                                                                                                                                                                                                                                                                                                                                                                                                                                                                                                                                                                             | CoronaNet Lab- TaskForce Regione Campania, CEINGE Biotecnologie Avanzate, Via G. Salvatore                   | CoronaNet Lab- TaskForce Regione Campania, CEINGE Biotecnologie Avanzate, Via G. Salvatore                              | Asadzadeh, F.; Atipaldi, L.; Bianchi, M.; Boccia, A.; Borriello, G.; Brandi, S.; Castaldo, G.; Cerino, R.; Chiariotti, L.; Comegna, M.; Ferrucci, V.; Fusco, G.; H.Y.; J.H.; J.M.; Jung; K.S. and Kim; Kong, Dy.; Lee; Marrone, L.; Paoletta, G.; Pascarella, S.; Siciliano, R.; Tiberio, C.; Viscardi, M.; Yun; Zollo, M. |
| EPI_ISL_514751                                                                                                                                                                                                                                                                                                                                                                                                                                                                                                                                                                                                                                                                                                                                                                                                                                                                           | Croatian Institute of Public Health                                                                          | University of Zagreb, Centre for research and knowledge transfer in biotechnology                                       | Anamarija Slovic; Irena Tabain; Jelena Ivancic Jelecki; Tatjana Vilibic-Cavlek                                                                                                                                                                                                                                             |
| EPI_ISL_454602                                                                                                                                                                                                                                                                                                                                                                                                                                                                                                                                                                                                                                                                                                                                                                                                                                                                           | DIP. PREV. AVEZZANO SERVIZIO DI IGIENE EPIDEMIOLOGIA E SANITA' PUBBLICA                                      | Istituto Zooprofilattico Sperimentale dell'Abruzzo e Molise "G. Caporale"                                               | Ancora M; Calistri P; Cammà C; Curini V; Delli Compagni E; Di Domenico M; Di Pasquale A; Lorusso A; Mangone I; Marcacci M; Puglia I; Rinaldi A; Savini G                                                                                                                                                                   |
| EPI_ISL_833050 to 833051, EPI_ISL_833057 to 833067                                                                                                                                                                                                                                                                                                                                                                                                                                                                                                                                                                                                                                                                                                                                                                                                                                       | DIPARTIMENTO PREVENZIONE AVEZZANO-SERVIZIO DI IGIENE EPIDEMIOLOGIA E SANITA' PUBBLICA                        | Istituto Zooprofilattico Sperimentale dell'Abruzzo e Molise "G.Caporale"                                                | Ancora M; Cammà C; Curini V; Di Domenico M; Di Pasquale A; Lorusso A; Mangone I; Marcacci M; Puglia I; Rinaldi A; Savini G.                                                                                                                                                                                                |
| EPI_ISL_849635 to 849636                                                                                                                                                                                                                                                                                                                                                                                                                                                                                                                                                                                                                                                                                                                                                                                                                                                                 |                                                                                                              |                                                                                                                         |                                                                                                                                                                                                                                                                                                                            |

|                                                                                                                                                                                                                                                                                                                                                                                                                                                                                                                                                                                                                                                                                                                                                                                                                                                                                                                                                                                                                                                                                                                                                                                                                                                                                                                                                                                                                          |                                                                                                                                                                  |                                                                                                                   |                                                                                                                                                                                                                                                               |                                                                                                                                                                                                                                                                                                                                                                                                                                                                            |
|--------------------------------------------------------------------------------------------------------------------------------------------------------------------------------------------------------------------------------------------------------------------------------------------------------------------------------------------------------------------------------------------------------------------------------------------------------------------------------------------------------------------------------------------------------------------------------------------------------------------------------------------------------------------------------------------------------------------------------------------------------------------------------------------------------------------------------------------------------------------------------------------------------------------------------------------------------------------------------------------------------------------------------------------------------------------------------------------------------------------------------------------------------------------------------------------------------------------------------------------------------------------------------------------------------------------------------------------------------------------------------------------------------------------------|------------------------------------------------------------------------------------------------------------------------------------------------------------------|-------------------------------------------------------------------------------------------------------------------|---------------------------------------------------------------------------------------------------------------------------------------------------------------------------------------------------------------------------------------------------------------|----------------------------------------------------------------------------------------------------------------------------------------------------------------------------------------------------------------------------------------------------------------------------------------------------------------------------------------------------------------------------------------------------------------------------------------------------------------------------|
| EPI_ISL_806758 to 806761, EPI_ISL_806763 to 806765, EPI_ISL_806781 to 806782, EPI_ISL_833283, EPI_ISL_833301                                                                                                                                                                                                                                                                                                                                                                                                                                                                                                                                                                                                                                                                                                                                                                                                                                                                                                                                                                                                                                                                                                                                                                                                                                                                                                             | DIPARTIMENTO PREVENZIONE AVEZZANO-SERVIZIO DI IGIENE EPIDEMIOLOGIA E SANITA' PUBBLICA                                                                            | Istituto Zooprofilattico Sperimentale dell'Abruzzo e Molise "G. Caporale"                                         | Ancora M; Calistri P; Cammà C; Curini V; Di Domenico M; Di Pasquale A; Lorusso A; Mangone I; Marcacci M; Puglia I; Rinaldi A; Savini G                                                                                                                        |                                                                                                                                                                                                                                                                                                                                                                                                                                                                            |
| EPI_ISL_529147 to 529148                                                                                                                                                                                                                                                                                                                                                                                                                                                                                                                                                                                                                                                                                                                                                                                                                                                                                                                                                                                                                                                                                                                                                                                                                                                                                                                                                                                                 | Democritus University of Thrace, Department of Medicine                                                                                                          | Democritus University of Thrace, Department of Medicine                                                           | Bampali, M.; Dovrolis, N.; Froukala, E.; Gatzidou, E.; Karakasiliotis, I.; Kassela, K.; Spanakis, N.; Stavropoulou, A.; Tsakris, A.; Veletza, S.                                                                                                              |                                                                                                                                                                                                                                                                                                                                                                                                                                                                            |
| EPI_ISL_508615 to 508631, EPI_ISL_508635 to 508643, EPI_ISL_508645 to 508650, EPI_ISL_508652 to 508657, EPI_ISL_508660 to 508661, EPI_ISL_508663 to 508665, EPI_ISL_508667 to 508670, EPI_ISL_508672 to 508673, EPI_ISL_508675 to 508676, EPI_ISL_508678 to 508683, EPI_ISL_508685                                                                                                                                                                                                                                                                                                                                                                                                                                                                                                                                                                                                                                                                                                                                                                                                                                                                                                                                                                                                                                                                                                                                       | see above                                                                                                                                                        | Departamento de Microbiologia, CDB, Hospital Clinic, Barcelona                                                    | SeqCOVID-SPAIN consortium/IBV(CSIC)                                                                                                                                                                                                                           | Aida Peiró and SeqCOVID-SPAIN consortium; Andrea Vergara; Elisa Rubio; Jéssica Navero; Mikel Martínez                                                                                                                                                                                                                                                                                                                                                                      |
| EPI_ISL_516922 to 516933                                                                                                                                                                                                                                                                                                                                                                                                                                                                                                                                                                                                                                                                                                                                                                                                                                                                                                                                                                                                                                                                                                                                                                                                                                                                                                                                                                                                 | Department for Molecular Diagnostics, Centre for Medical Microbiology, Institute of Public Health of Montenegro                                                  | Charite Universitätsmedizin Berlin, Institut für Virologie                                                        | Barbara Muehlemann; Christian Drosten; Julia Schneider; Jörn Beheim-Schwarzbach; Marija Govedarica and Danijela Vujošević; Talitha Veith; Terry Jones; Victor M Corman                                                                                        |                                                                                                                                                                                                                                                                                                                                                                                                                                                                            |
| EPI_ISL_416997, EPI_ISL_417004 to 417006, EPI_ISL_417008 to 417009, EPI_ISL_417011 to 417023, EPI_ISL_417025, EPI_ISL_418623 to 418646, EPI_ISL_418648 to 418666, EPI_ISL_421182 to 421196, EPI_ISL_421198 to 421214, EPI_ISL_424628 to 424634, EPI_ISL_424636 to 424665, EPI_ISL_427340 to 427390, EPI_ISL_447120 to 447162, EPI_ISL_455958 to 455979, EPI_ISL_471427 to 471437, EPI_ISL_484693 to 484704, EPI_ISL_484706 to 484708, EPI_ISL_498127 to 498151, EPI_ISL_498628 to 498629, EPI_ISL_515055 to 515081, EPI_ISL_540469 to 540518, EPI_ISL_540520 to 540556, EPI_ISL_540558 to 540578, EPI_ISL_581575 to 581582, EPI_ISL_581585 to 581667, EPI_ISL_582027, EPI_ISL_626231 to 626240, EPI_ISL_626242 to 626339, EPI_ISL_636605 to 636685, EPI_ISL_641557 to 641606, EPI_ISL_644611 to 644626, EPI_ISL_661201 to 661251, EPI_ISL_666871 to 666889, EPI_ISL_678399 to 678409, EPI_ISL_678411 to 678427, EPI_ISL_678429 to 678485, EPI_ISL_681264 to 681270, EPI_ISL_707715 to 707721, EPI_ISL_707723 to 707770, EPI_ISL_708454 to 708459, EPI_ISL_722926 to 722966, EPI_ISL_737310 to 737338, EPI_ISL_737340, EPI_ISL_737342 to 737375, EPI_ISL_737377 to 737387, EPI_ISL_737390 to 737394, EPI_ISL_824790 to 824831, EPI_ISL_824833 to 824834, EPI_ISL_832207, EPI_ISL_833186 to 833187, EPI_ISL_872040 to 872041, EPI_ISL_872058 to 872060, EPI_ISL_872062 to 872064, EPI_ISL_872109, EPI_ISL_872153 to 872155 | see above                                                                                                                                                        | Department of Clinical Microbiology                                                                               | GIGA Medical Genomics                                                                                                                                                                                                                                         | Artesi Maria; Axelle Chaslain; Bontems Sébastien; Boreux Raphaël; Bouchra Boujemla; Bours Vincent.; Cecile Meex; Celine Fombellida-Lopez; Cécile Meex; Céline Fombellida-Lopez; Durkin Keith; Gilles Darcis; Hayette Marie-Pierre; Justine Defêche; Keith Durkin; Maria Artesi; Marie-Pierre Hayette; Meex Cécile; Melin Pierrette; Michel Moutschen; Pierrette Melin; Raphael Boreux; Raphaël Boreux; Sebastien Bontems; Sébastien Bontems; Vincent Bours; Vincent Bours. |
| EPI_ISL_429262 to 429289, EPI_ISL_429291, EPI_ISL_429293 to 429318, EPI_ISL_429320 to 429331, EPI_ISL_451988 to 452001, EPI_ISL_452003 to 452004, EPI_ISL_452006 to 452007, EPI_ISL_452009 to 452010, EPI_ISL_452012 to 452016, EPI_ISL_452018 to 452060, EPI_ISL_452063 to 452071, EPI_ISL_452073, EPI_ISL_452075 to 452100                                                                                                                                                                                                                                                                                                                                                                                                                                                                                                                                                                                                                                                                                                                                                                                                                                                                                                                                                                                                                                                                                             | see above                                                                                                                                                        | Department of Clinical Microbiology, Copenhagen University Hospital, Hvidovre, Kettegaard Alle 30, 2650 Hvidovre. | Albertsen lab, Department of Chemistry and Bioscience, Aalborg University, Denmark                                                                                                                                                                            | Rasmus Kirkegaard                                                                                                                                                                                                                                                                                                                                                                                                                                                          |
| EPI_ISL_507206 to 507215, EPI_ISL_605793 to 605796                                                                                                                                                                                                                                                                                                                                                                                                                                                                                                                                                                                                                                                                                                                                                                                                                                                                                                                                                                                                                                                                                                                                                                                                                                                                                                                                                                       | Department of Experimental Modeling and Pathogenesis of Infectious Diseases                                                                                      | WHO National Influenza Centre Russian Federation                                                                  | Alekseev A.Yu.; Andrey Komissarov; Anna Ivanova; Artem Fadeev; Chepurnov A.A.; Daria Danilenko; Kononova Yu.V.; Kseniya Komissarova; Maria Sergeeva; Shestopalov A.M.; Sobolev I.A.                                                                           |                                                                                                                                                                                                                                                                                                                                                                                                                                                                            |
| EPI_ISL_487276                                                                                                                                                                                                                                                                                                                                                                                                                                                                                                                                                                                                                                                                                                                                                                                                                                                                                                                                                                                                                                                                                                                                                                                                                                                                                                                                                                                                           | Department of Food Safety, Nutrition and Veterinary public health, Istituto Superiore di Sanita'                                                                 | Department of Biomedical, Surgical and Dental Sciences and Department of Biomedical Sciences for Health           | Anselmi, G.; Basilico, N.; Binda, S.; D'Alessandro, S.; Delbue, S.; Ferrante, P.; Galli, C.; Parapini, S.; Pariani, E.; Primache, V.; Signorini, L.                                                                                                           |                                                                                                                                                                                                                                                                                                                                                                                                                                                                            |
| EPI_ISL_522407 to 522408                                                                                                                                                                                                                                                                                                                                                                                                                                                                                                                                                                                                                                                                                                                                                                                                                                                                                                                                                                                                                                                                                                                                                                                                                                                                                                                                                                                                 | Department of Infection Prevention and Infectious Diseases, University Hospital Regensburg                                                                       | Department of Infection Prevention and Infectious Diseases, University Hospital Regensburg                        | Fritsch, J.; Holzmann, T.; Schneider-Brachert, W.                                                                                                                                                                                                             |                                                                                                                                                                                                                                                                                                                                                                                                                                                                            |
| EPI_ISL_513298 to 513307                                                                                                                                                                                                                                                                                                                                                                                                                                                                                                                                                                                                                                                                                                                                                                                                                                                                                                                                                                                                                                                                                                                                                                                                                                                                                                                                                                                                 | Department of Infection Prevention and Infectious Diseases, University Hospital Regensburg                                                                       | University Hospital Regensburg                                                                                    | Fritsch, J.; Holzmann, T.; Schneider-Brachert, W.                                                                                                                                                                                                             |                                                                                                                                                                                                                                                                                                                                                                                                                                                                            |
| EPI_ISL_524474, EPI_ISL_524480 to 524481                                                                                                                                                                                                                                                                                                                                                                                                                                                                                                                                                                                                                                                                                                                                                                                                                                                                                                                                                                                                                                                                                                                                                                                                                                                                                                                                                                                 | Department of Infectious Diseases, Cantonal Hospital Baden                                                                                                       | Institute of Medical Virology, University of Zurich                                                               | Alexandra Trkola; Andrea Zbinden; Fiona Steiner; Gabriela Ziltener; Jon Huder; Jürg Böni; Maryam Zaheri; Michael Huber; Patrick Redli; Riccarda Capaul; Stefan Schmutz; Verena Kufner                                                                         |                                                                                                                                                                                                                                                                                                                                                                                                                                                                            |
| EPI_ISL_457699 to 457700, EPI_ISL_457721, EPI_ISL_457724, EPI_ISL_457728, EPI_ISL_457732, EPI_ISL_457736, EPI_ISL_457749                                                                                                                                                                                                                                                                                                                                                                                                                                                                                                                                                                                                                                                                                                                                                                                                                                                                                                                                                                                                                                                                                                                                                                                                                                                                                                 | see above                                                                                                                                                        | Department of Infectious Diseases, Istituto Superiore di Sanità, Roma , Italy                                     | Army Medical and Veterinary Research Center                                                                                                                                                                                                                   | Alessandra Lo Presti; Anna Anselmo; Antonella Fortunato; Antonella Marchi; Concetta Fabiani Silvia Fillo; Concetta Fabiani Silvia Fillo; Eleonora Benedetti; Florigio Lista; Francesco Giordani; Giovanni Faggioni; Nino D'Amore; Paola Stefanelli; Riccardo De Sanctis; Stefano Fiore; Vanessa Vera Fain                                                                                                                                                                  |
| EPI_ISL_412973                                                                                                                                                                                                                                                                                                                                                                                                                                                                                                                                                                                                                                                                                                                                                                                                                                                                                                                                                                                                                                                                                                                                                                                                                                                                                                                                                                                                           | Department of Infectious Diseases, Istituto Superiore di Sanità, Roma , Italy                                                                                    | Virology Laboratory, Scientific Department, Army Medical Center                                                   | Andrea Ciammarucini; Anna Anselmo; Antonella Fortunato; Antonella Marchi; Concetta Fabiani; Eleonora Benedetti; Florigio Lista; Giovanni Faggioni; Paola Stefanelli; Riccardo De Santis; Silvia Fillo; Stefano Fiore; Stefano Palomba                         |                                                                                                                                                                                                                                                                                                                                                                                                                                                                            |
| EPI_ISL_856889, EPI_ISL_856904                                                                                                                                                                                                                                                                                                                                                                                                                                                                                                                                                                                                                                                                                                                                                                                                                                                                                                                                                                                                                                                                                                                                                                                                                                                                                                                                                                                           | Department of Infectious Diseases, Istituto Superiore di Sanità, Roma, Italy                                                                                     | Virology Laboratory, Scientific Department, Army Medical Center                                                   | Alessandra Lo Presti; Angela Di Martino; Anna Anselmo; Antonella Fortunato; Florigio Lista; Francesco Giordani; Giovanni Faggioni; Nino D'Amore; Paola Stefanelli; Riccardo De Sanctis; Silvia Fillo; Stefano Fiore; Vanessa Vera Fain                        |                                                                                                                                                                                                                                                                                                                                                                                                                                                                            |
| EPI_ISL_856888                                                                                                                                                                                                                                                                                                                                                                                                                                                                                                                                                                                                                                                                                                                                                                                                                                                                                                                                                                                                                                                                                                                                                                                                                                                                                                                                                                                                           | Department of Infectious Diseases, Istituto Superiore di Sanità, Roma, Italy; A.O.R. San Carlo di Potenza, Laboratorio Microbiologia e Virologia, Potenza, Italy | Virology Laboratory, Scientific Department, Army Medical Center                                                   | Alessandra Lo Presti; Angela Di Martino; Anna Anselmo; Antonella Fortunato; Antonio Picerno; Florigio Lista; Francesco Giordani; Giovanni Faggioni; Nino D'Amore; Paola Stefanelli; Riccardo De Sanctis; Silvia Fillo; Stefano Fiore; Vanessa Vera Fain       |                                                                                                                                                                                                                                                                                                                                                                                                                                                                            |
| EPI_ISL_856890                                                                                                                                                                                                                                                                                                                                                                                                                                                                                                                                                                                                                                                                                                                                                                                                                                                                                                                                                                                                                                                                                                                                                                                                                                                                                                                                                                                                           | Department of Infectious Diseases, Istituto Superiore di Sanità, Roma, Italy; AO Annunziata, UOC Microbiologia e Virologia, Cosenza, Italy                       | Virology Laboratory, Scientific Department, Army Medical Center                                                   | Alessandra Lo Presti; Angela Di Martino; Anna Anselmo; Antonella Fortunato; Cristina Giraldi; Florigio Lista; Francesco Giordani; Giovanni Faggioni; Nino D'Amore; Paola Stefanelli; Riccardo De Sanctis; Silvia Fillo; Stefano Fiore; Vanessa Vera Fain      |                                                                                                                                                                                                                                                                                                                                                                                                                                                                            |
| EPI_ISL_856905 to 856906                                                                                                                                                                                                                                                                                                                                                                                                                                                                                                                                                                                                                                                                                                                                                                                                                                                                                                                                                                                                                                                                                                                                                                                                                                                                                                                                                                                                 | Department of Infectious Diseases, Istituto Superiore di Sanità, Roma, Italy; AO S.M. della Misericordia, S.C. Microbiologia, Perugia, Italy                     | Virology Laboratory, Scientific Department, Army Medical Center                                                   | Alessandra Lo Presti; Angela Di Martino; Anna Anselmo; Antonella Fortunato; Barbara Camilloni; Florigio Lista; Francesco Giordani; Giovanni Faggioni; Nino D'Amore; Paola Stefanelli; Riccardo De Sanctis; Silvia Fillo; Stefano Fiore; Vanessa Vera Fain     |                                                                                                                                                                                                                                                                                                                                                                                                                                                                            |
| EPI_ISL_856871, EPI_ISL_856891 to 856892                                                                                                                                                                                                                                                                                                                                                                                                                                                                                                                                                                                                                                                                                                                                                                                                                                                                                                                                                                                                                                                                                                                                                                                                                                                                                                                                                                                 | Department of Infectious Diseases, Istituto Superiore di Sanità, Roma, Italy; AORN dei Colli, UOC Microbiologia Virologia, Napoli, Italy                         | Virology Laboratory, Scientific Department, Army Medical Center                                                   | Alessandra Lo Presti; Angela Di Martino; Anna Anselmo; Antonella Fortunato; Florigio Lista; Francesco Giordani; Giovanni Faggioni; Luigi Atripaldi; Nino D'Amore; Paola Stefanelli; Riccardo De Sanctis; Silvia Fillo; Stefano Fiore; Vanessa Vera Fain       |                                                                                                                                                                                                                                                                                                                                                                                                                                                                            |
| EPI_ISL_856900 to 856901                                                                                                                                                                                                                                                                                                                                                                                                                                                                                                                                                                                                                                                                                                                                                                                                                                                                                                                                                                                                                                                                                                                                                                                                                                                                                                                                                                                                 | Department of Infectious Diseases, Istituto Superiore di Sanità, Roma, Italy; AOUP V. Emanuele di Catania, P.O. Gaspare Rodolico, Catania, Italy                 | Virology Laboratory, Scientific Department, Army Medical Center                                                   | Alessandra Lo Presti; Angela Di Martino; Anna Anselmo; Antonella Fortunato; Florigio Lista; Francesco Giordani; Giovanni Faggioni; Guido Scalia; Nino D'Amore; Paola Stefanelli; Riccardo De Sanctis; Silvia Fillo; Stefano Fiore; Vanessa Vera Fain          |                                                                                                                                                                                                                                                                                                                                                                                                                                                                            |
| EPI_ISL_856902                                                                                                                                                                                                                                                                                                                                                                                                                                                                                                                                                                                                                                                                                                                                                                                                                                                                                                                                                                                                                                                                                                                                                                                                                                                                                                                                                                                                           | Department of Infectious Diseases, Istituto Superiore di Sanità, Roma, Italy; AS Alto Adige, Microbiologia e Virologia, Bolzano, Italy                           | Virology Laboratory, Scientific Department, Army Medical Center                                                   | Alessandra Lo Presti; Angela Di Martino; Anna Anselmo; Antonella Fortunato; Elisabetta Pagani; Florigio Lista; Francesco Giordani; Giovanni Faggioni; Nino D'Amore; Paola Stefanelli; Riccardo De Sanctis; Silvia Fillo; Stefano Fiore; Vanessa Vera Fain     |                                                                                                                                                                                                                                                                                                                                                                                                                                                                            |
| EPI_ISL_856898 to 856899                                                                                                                                                                                                                                                                                                                                                                                                                                                                                                                                                                                                                                                                                                                                                                                                                                                                                                                                                                                                                                                                                                                                                                                                                                                                                                                                                                                                 | Department of Infectious Diseases, Istituto Superiore di Sanità, Roma, Italy; ASL Città di Torino, S.C. Microbiologia e Virologia, Torino, Italy                 | Virology Laboratory, Scientific Department, Army Medical Center                                                   | Alessandra Lo Presti; Angela Di Martino; Anna Anselmo; Antonella Fortunato; Florigio Lista; Francesco Giordani; Giovanni Faggioni; Nino D'Amore; Paola Stefanelli; Riccardo De Sanctis; Silvia Fillo; Stefano Fiore; Valeria Ghisetti; Vanessa Vera Fain      |                                                                                                                                                                                                                                                                                                                                                                                                                                                                            |
| EPI_ISL_856893 to 856894                                                                                                                                                                                                                                                                                                                                                                                                                                                                                                                                                                                                                                                                                                                                                                                                                                                                                                                                                                                                                                                                                                                                                                                                                                                                                                                                                                                                 | Department of Infectious Diseases, Istituto Superiore di Sanità, Roma, Italy; ASUITS - Ospedale Maggiore, S.C. UOC Igien e Sanità Pubblica, Trieste, Italy       | Virology Laboratory, Scientific Department, Army Medical Center                                                   | Alessandra Lo Presti; Angela Di Martino; Anna Anselmo; Antonella Fortunato; Florigio Lista; Francesco Giordani; Giovanni Faggioni; Nino D'Amore; Paola Stefanelli; Pierlanfranco D'Agaro; Riccardo De Sanctis; Silvia Fillo; Stefano Fiore; Vanessa Vera Fain |                                                                                                                                                                                                                                                                                                                                                                                                                                                                            |
| EPI_ISL_856887                                                                                                                                                                                                                                                                                                                                                                                                                                                                                                                                                                                                                                                                                                                                                                                                                                                                                                                                                                                                                                                                                                                                                                                                                                                                                                                                                                                                           | Department of Infectious Diseases, Istituto Superiore di Sanità, Roma, Italy; AUOC Policlinico Bari, UOC Igien e Bari, Italy                                     | Virology Laboratory, Scientific Department, Army Medical Center                                                   | Alessandra Lo Presti; Angela Di Martino; Anna Anselmo; Antonella Fortunato; Florigio Lista; Francesco Giordani; Giovanni Faggioni; Maria Chironna; Nino D'Amore; Paola Stefanelli; Riccardo De Sanctis; Silvia Fillo; Stefano Fiore; Vanessa Vera Fain        |                                                                                                                                                                                                                                                                                                                                                                                                                                                                            |
| EPI_ISL_856907                                                                                                                                                                                                                                                                                                                                                                                                                                                                                                                                                                                                                                                                                                                                                                                                                                                                                                                                                                                                                                                                                                                                                                                                                                                                                                                                                                                                           | Department of Infectious Diseases, Istituto Superiore di Sanità, Roma, Italy; AUSL Valle d'Aosta, Aosta, Italy                                                   | Virology Laboratory, Scientific Department, Army Medical Center                                                   | Alessandra Lo Presti; Angela Di Martino; Anna Anselmo; Antonella Fortunato; Florigio Lista; Francesco Giordani; Giovanni Faggioni; Massimo Di Benedetto; Nino D'Amore; Paola Stefanelli; Riccardo De Sanctis; Silvia Fillo; Stefano Fiore; Vanessa Vera Fain  |                                                                                                                                                                                                                                                                                                                                                                                                                                                                            |
| EPI_ISL_856880, EPI_ISL_856895 to 856896                                                                                                                                                                                                                                                                                                                                                                                                                                                                                                                                                                                                                                                                                                                                                                                                                                                                                                                                                                                                                                                                                                                                                                                                                                                                                                                                                                                 | Department of Infectious Diseases, Istituto Superiore di Sanità, Roma, Italy; Ospedali Riuniti, Laboratorio Virologia, Ancona, Italy                             | Virology Laboratory, Scientific Department, Army Medical Center                                                   | Alessandra Lo Presti; Angela Di Martino; Anna Anselmo; Antonella Fortunato; Florigio Lista; Francesco Giordani; Giovanni Faggioni; Nino D'Amore; Paola Stefanelli; Patrizia Bagnarelli; Riccardo De Sanctis; Silvia Fillo; Stefano Fiore; Vanessa Vera Fain   |                                                                                                                                                                                                                                                                                                                                                                                                                                                                            |
| EPI_ISL_856881, EPI_ISL_856897                                                                                                                                                                                                                                                                                                                                                                                                                                                                                                                                                                                                                                                                                                                                                                                                                                                                                                                                                                                                                                                                                                                                                                                                                                                                                                                                                                                           | Department of Infectious Diseases, Istituto Superiore di Sanità, Roma, Italy; PO Cardarelli, Laboratorio Analisi Microbiologia e Virologia, Campobasso, Italy    | Virology Laboratory, Scientific Department, Army Medical Center                                                   | Alessandra Lo Presti; Angela Di Martino; Anna Anselmo; Antonella Fortunato; Florigio Lista; Francesco Giordani; Giovanni Faggioni; Massimiliano Scutellà; Nino D'Amore; Paola Stefanelli; Riccardo De Sanctis; Silvia Fillo; Stefano Fiore; Vanessa Vera Fain |                                                                                                                                                                                                                                                                                                                                                                                                                                                                            |

|                                                                                                                                                                                                                                                                                                                                                                                                                                                                                                                                                                                                                                                                                                                                                                                                                                                                                                                                                                                                                                                                                                                                                                                                                                                                                                                                                                                                                                                                           |                                                                                                                                                                                                                                                                                      |                                                                                                                 |                                                                                                                                                                                                                                                                                                                                                                                                                        |
|---------------------------------------------------------------------------------------------------------------------------------------------------------------------------------------------------------------------------------------------------------------------------------------------------------------------------------------------------------------------------------------------------------------------------------------------------------------------------------------------------------------------------------------------------------------------------------------------------------------------------------------------------------------------------------------------------------------------------------------------------------------------------------------------------------------------------------------------------------------------------------------------------------------------------------------------------------------------------------------------------------------------------------------------------------------------------------------------------------------------------------------------------------------------------------------------------------------------------------------------------------------------------------------------------------------------------------------------------------------------------------------------------------------------------------------------------------------------------|--------------------------------------------------------------------------------------------------------------------------------------------------------------------------------------------------------------------------------------------------------------------------------------|-----------------------------------------------------------------------------------------------------------------|------------------------------------------------------------------------------------------------------------------------------------------------------------------------------------------------------------------------------------------------------------------------------------------------------------------------------------------------------------------------------------------------------------------------|
| EPI_ISL_856908                                                                                                                                                                                                                                                                                                                                                                                                                                                                                                                                                                                                                                                                                                                                                                                                                                                                                                                                                                                                                                                                                                                                                                                                                                                                                                                                                                                                                                                            | Department of Infectious Diseases, Istituto Superiore di Sanità, Roma, Italy; PO Madre Teresa di Calcutta, UOC. Laboratorio Analisi ULSS 6 Euganea, Padova, Italy                                                                                                                    | Virology Laboratory, Scientific Department, Army Medical Center                                                 | Alessandra Lo Presti; Angela Di Martino; Anna Anselmo; Antonella Fortunato; Florigio Lista; Francesco Giordani; Giacomo Mezzapelle; Giovanni Faggioni; Nino D'Amore; Paola Stefanelli; Riccardo De Sanctis; Silvia Fillo; Stefano Fiore; Vanessa Vera Fain                                                                                                                                                             |
| EPI_ISL_856884, EPI_ISL_856903                                                                                                                                                                                                                                                                                                                                                                                                                                                                                                                                                                                                                                                                                                                                                                                                                                                                                                                                                                                                                                                                                                                                                                                                                                                                                                                                                                                                                                            | Department of Infectious Diseases, Istituto Superiore di Sanità, Roma, Italy; PO Santa Chiara, Microbiologia e Virologia, Trento, Italy                                                                                                                                              | Virology Laboratory, Scientific Department, Army Medical Center                                                 | Alessandra Lo Presti; Angela Di Martino; Anna Anselmo; Antonella Fortunato; Florigio Lista; Francesco Giordani; Giovanni Faggioni; Nino D'Amore; Paola Stefanelli; Paolo Lanzafame; Riccardo De Sanctis; Silvia Fillo; Stefano Fiore; Vanessa Vera Fain                                                                                                                                                                |
| EPI_ISL_856886                                                                                                                                                                                                                                                                                                                                                                                                                                                                                                                                                                                                                                                                                                                                                                                                                                                                                                                                                                                                                                                                                                                                                                                                                                                                                                                                                                                                                                                            | Department of Infectious Diseases, Istituto Superiore di Sanità, Roma, Italy; PO Spirito Santo, UOC Microbiologia e Virologia Clinica, Pescara, Italy                                                                                                                                | Virology Laboratory, Scientific Department, Army Medical Center                                                 | Alessandra Lo Presti; Angela Di Martino; Anna Anselmo; Antonella Fortunato; Florigio Lista; Francesco Giordani; Giovanni Faggioni; Nino D'Amore; Paola Stefanelli; Paolo Fazio; Riccardo De Sanctis; Silvia Fillo; Stefano Fiore; Vanessa Vera Fain                                                                                                                                                                    |
| EPI_ISL_856909                                                                                                                                                                                                                                                                                                                                                                                                                                                                                                                                                                                                                                                                                                                                                                                                                                                                                                                                                                                                                                                                                                                                                                                                                                                                                                                                                                                                                                                            | Department of Infectious Diseases, Istituto Superiore di Sanità, Roma, Italy; ULSS 8 Berica Vicenza, UOC Microbiologia, Vicenza, Italy                                                                                                                                               | Virology Laboratory, Scientific Department, Army Medical Center                                                 | Alessandra Lo Presti; Angela Di Martino; Anna Anselmo; Antonella Fortunato; Florigio Lista; Francesco Giordani; Giovanni Faggioni; Mario Rassu; Nino D'Amore; Paola Stefanelli; Riccardo De Sanctis; Silvia Fillo; Stefano Fiore; Vanessa Vera Fain                                                                                                                                                                    |
| EPI_ISL_855550, EPI_ISL_855553                                                                                                                                                                                                                                                                                                                                                                                                                                                                                                                                                                                                                                                                                                                                                                                                                                                                                                                                                                                                                                                                                                                                                                                                                                                                                                                                                                                                                                            | Department of Infectious Diseases, Istituto Superiore di Sanità, Rome, Italy                                                                                                                                                                                                         | Istituto Superiore di Sanità (ISS)                                                                              | Alessandra Lo Presti; Angela Di Martino; Gabriele Vaccari; Giovanni Ianiro; Ilaria Di Bartolo; Luca De Sabato; Manuela Marra; Marco Crescenzi; Maria Carollo; Paola Stefanelli; Stefano Fiore                                                                                                                                                                                                                          |
| EPI_ISL_412974                                                                                                                                                                                                                                                                                                                                                                                                                                                                                                                                                                                                                                                                                                                                                                                                                                                                                                                                                                                                                                                                                                                                                                                                                                                                                                                                                                                                                                                            | Department of Infectious Diseases, Istituto Superiore di Sanità, Rome, Italy                                                                                                                                                                                                         | Virology Laboratory, Scientific Department, Army Medical Center                                                 | Andrea Ciammaruconi; Antonella Fortunato; Antonella Marchi; Concetta Fabiani; Eleonora Benedetti; Filippo Molinari; Florigio Lista; Giancarlo Petralito; Giovanni Faggioni; Paola Stefanelli; Riccardo De Santis; Silvia Fillo; Stefano Fiore                                                                                                                                                                          |
| EPI_ISL_910331 to 910332                                                                                                                                                                                                                                                                                                                                                                                                                                                                                                                                                                                                                                                                                                                                                                                                                                                                                                                                                                                                                                                                                                                                                                                                                                                                                                                                                                                                                                                  | Department of Infectious Diseases, Istituto Superiore di Sanità, Rome, Italy; AOUP Paolo Giaccone, Palermo, Italy                                                                                                                                                                    | Istituto Superiore di Sanità (ISS)                                                                              | Alessandra Lo Presti; Angela Di Martino; Carmelo Maida; Daniela Di Naro; Fabio Tramuto; Francesco Vitale; Giulia Randazzo; Manuela Marra; Marco Crescenzi; Maria Carollo; Paola Stefanelli; Stefano Fiore                                                                                                                                                                                                              |
| EPI_ISL_855554 to 855555                                                                                                                                                                                                                                                                                                                                                                                                                                                                                                                                                                                                                                                                                                                                                                                                                                                                                                                                                                                                                                                                                                                                                                                                                                                                                                                                                                                                                                                  | Department of Infectious Diseases, Istituto Superiore di Sanità, Rome, Italy; ASST G.O.M. Niguarda, Sezione Microbiologia e Virologia, Milano, Italy                                                                                                                                 | Istituto Superiore di Sanità (ISS)                                                                              | Alessandra Lo Presti; Angela Di Martino; Carlo Federico Perno; Gabriele Vaccari; Giovanni Ianiro; Ilaria Di Bartolo; Luca De Sabato; Manuela Marra; Marco Crescenzi; Maria Carollo; Paola Stefanelli; Stefano Fiore                                                                                                                                                                                                    |
| EPI_ISL_855552                                                                                                                                                                                                                                                                                                                                                                                                                                                                                                                                                                                                                                                                                                                                                                                                                                                                                                                                                                                                                                                                                                                                                                                                                                                                                                                                                                                                                                                            | Department of Infectious Diseases, Istituto Superiore di Sanità, Rome, Italy; Ospedali Riuniti, Laboratorio Virologia, Ancona, Italy                                                                                                                                                 | Istituto Superiore di Sanità (ISS)                                                                              | Alessandra Lo Presti; Angela Di Martino; Gabriele Vaccari; Giovanni Ianiro; Ilaria Di Bartolo; Luca De Sabato; Manuela Marra; Marco Crescenzi; Maria Carollo; Paola Stefanelli; Patrizia Bagnarelli; Stefano Fiore                                                                                                                                                                                                     |
| EPI_ISL_875687                                                                                                                                                                                                                                                                                                                                                                                                                                                                                                                                                                                                                                                                                                                                                                                                                                                                                                                                                                                                                                                                                                                                                                                                                                                                                                                                                                                                                                                            | Department of Infectious Diseases, Istituto Superiore di Sanità, Rome, Italy; UCO Igiene e Sanità Pubblica, ASUGI, Trieste, Italy; Laboratorio di Genomica ed Epigenomica sistema Argo, Area SciencePark, Trieste, Italy; Laboratorio di Virologia Molecolare, ICGEB, Trieste, Italy | Istituto Superiore di Sanità (ISS)                                                                              | Alessandra Lo Presti; Alessandro Marcello; Angela Di Martino; Danilo Licastro; Ludovica Segat; Manuela Marra; Marco Crescenzi; Maria Carollo; Paola Stefanelli; Pierlanfranco D'Agaro; Stefano Fiore                                                                                                                                                                                                                   |
| EPI_ISL_411218 to 411220                                                                                                                                                                                                                                                                                                                                                                                                                                                                                                                                                                                                                                                                                                                                                                                                                                                                                                                                                                                                                                                                                                                                                                                                                                                                                                                                                                                                                                                  | Department of Infectious and Tropical Diseases, Bichat Claude Bernard Hospital, Paris                                                                                                                                                                                                | Laboratoire Virpath, CIRI U111, UCBL1, INSERM, CNRS, ENS Lyon                                                   | Alexandre Gaymard; Aurélien Traversier; Bruno Lina; Catherine Legras-Lachuer; Julien Fourret; Manuel Rosa-Calatrava; Olivier Terrier; Xavier Lescure; Yazdan Yazdanpanah                                                                                                                                                                                                                                               |
| EPI_ISL_410720, EPI_ISL_410984                                                                                                                                                                                                                                                                                                                                                                                                                                                                                                                                                                                                                                                                                                                                                                                                                                                                                                                                                                                                                                                                                                                                                                                                                                                                                                                                                                                                                                            | Department of Infectious and Tropical Diseases, Bichat Claude Bernard Hospital, Paris                                                                                                                                                                                                | National Reference Center for Viruses of Respiratory Infections, Institut Pasteur, Paris                        | Angela Brisebarre; Flora Donati; Marion Barbet; Maud Vanpeene; Mélanie Albert; Meline Bizard; Sylvie Behillili; Sylvie van der Werf; Vincent Enouf; Xavier Lescure; Xavier Lescure.; Yazdan Yazdanpanah                                                                                                                                                                                                                |
| EPI_ISL_413019 to 413020                                                                                                                                                                                                                                                                                                                                                                                                                                                                                                                                                                                                                                                                                                                                                                                                                                                                                                                                                                                                                                                                                                                                                                                                                                                                                                                                                                                                                                                  | Department of Internal Medicine, Triemli Hospital                                                                                                                                                                                                                                    | Institute of Medical Virology, University of Zurich                                                             | Alexandra Trkola; Andrea Zbinden; Fiona Steiner; Gerhard Eich; Jon Huder; Jürg Böni; Maryam Zaheri; Michael Huber; Patrick Redli; Riccarda Capaul; Stefan Schmutz; Verena Kufner                                                                                                                                                                                                                                       |
| EPI_ISL_413592, EPI_ISL_422408 to 422409, EPI_ISL_422412 to 422414, EPI_ISL_422416, EPI_ISL_422418, EPI_ISL_422420 to 422422, EPI_ISL_447619, EPI_ISL_693305, EPI_ISL_872597                                                                                                                                                                                                                                                                                                                                                                                                                                                                                                                                                                                                                                                                                                                                                                                                                                                                                                                                                                                                                                                                                                                                                                                                                                                                                              |                                                                                                                                                                                                                                                                                      |                                                                                                                 |                                                                                                                                                                                                                                                                                                                                                                                                                        |
| see above                                                                                                                                                                                                                                                                                                                                                                                                                                                                                                                                                                                                                                                                                                                                                                                                                                                                                                                                                                                                                                                                                                                                                                                                                                                                                                                                                                                                                                                                 | Department of Laboratory Medicine, National Taiwan University Hospital                                                                                                                                                                                                               | Microbial Genomics Core Lab, National Taiwan University Centers of Genomic and Precision Medicine               | Chiao-Ling Li; Pei-Jer Chen; Shan-Chwen Chang; Shiou-Hwei Yeh; Sui-Yuan Chang; Ya-Yun Lai; You-Yu Lin                                                                                                                                                                                                                                                                                                                  |
| EPI_ISL_803880 to 803888, EPI_ISL_803891 to 803893, EPI_ISL_803895                                                                                                                                                                                                                                                                                                                                                                                                                                                                                                                                                                                                                                                                                                                                                                                                                                                                                                                                                                                                                                                                                                                                                                                                                                                                                                                                                                                                        | Department of Medical Biotechnologies, University of Siena                                                                                                                                                                                                                           | Laboratory of Infectious Diseases, Department of Biomedical and Clinical Sciences L. Sacco, University of Milan | Alessia Lai; Annalisa Bergna; Carla Della Ventura; Claudia Balotta; Filippo Dragoni; Gianguglielmo Zehender on behalf of SARS-CoV-2 ITALIAN RESEARCH ENTERPRISE-(SCIRE) Collaborative Group; Ilaria Vicenti; Maria Grazia Cusi; Massimo Galli; Maurizio Zazzi                                                                                                                                                          |
| EPI_ISL_591012, EPI_ISL_591018 to 591019, EPI_ISL_775428 to 775437, EPI_ISL_775467, EPI_ISL_775523, EPI_ISL_796653, EPI_ISL_796681 to 796683                                                                                                                                                                                                                                                                                                                                                                                                                                                                                                                                                                                                                                                                                                                                                                                                                                                                                                                                                                                                                                                                                                                                                                                                                                                                                                                              |                                                                                                                                                                                                                                                                                      |                                                                                                                 |                                                                                                                                                                                                                                                                                                                                                                                                                        |
| see above                                                                                                                                                                                                                                                                                                                                                                                                                                                                                                                                                                                                                                                                                                                                                                                                                                                                                                                                                                                                                                                                                                                                                                                                                                                                                                                                                                                                                                                                 | Department of Medical Microbiology - section Molde, Molde Hospital                                                                                                                                                                                                                   | Norwegian Institute of Public Health, Department of Virology                                                    | Atiya R Ali; Hilde Elshaug; Hilde Vollan; Kamilla Heddeland Instefjord; Karoline Bragstad; Kathrine Stene-Johansen; Marie Paulsen Madsen; Olav Hungnes; Rasmus Riis Kopperud                                                                                                                                                                                                                                           |
| EPI_ISL_454416                                                                                                                                                                                                                                                                                                                                                                                                                                                                                                                                                                                                                                                                                                                                                                                                                                                                                                                                                                                                                                                                                                                                                                                                                                                                                                                                                                                                                                                            | Department of Medical Microbiology, Leiden University Medical Center                                                                                                                                                                                                                 | Department of Medical Microbiology, Leiden University Medical Center                                            | Dalebout; E.J.; J.C.; J.J. and Sidorov, I.; N.S.; Ogando; Snijder; T.J.; Zevenhoven; de Vries                                                                                                                                                                                                                                                                                                                          |
| EPI_ISL_591007, EPI_ISL_591014, EPI_ISL_635096, EPI_ISL_635100, EPI_ISL_635110 to 635111, EPI_ISL_635126, EPI_ISL_635135 to 635136, EPI_ISL_635165, EPI_ISL_668404, EPI_ISL_668417 to 668418, EPI_ISL_668420 to 668421, EPI_ISL_668441, EPI_ISL_708042 to 708043, EPI_ISL_708106 to 708109, EPI_ISL_708142 to 708146, EPI_ISL_759969 to 759972, EPI_ISL_775306, EPI_ISL_775464 to 775466, EPI_ISL_775475, EPI_ISL_775481, EPI_ISL_775491 to 775494, EPI_ISL_775505 to 775508, EPI_ISL_796687, EPI_ISL_796706, EPI_ISL_796711, EPI_ISL_796717 to 796721, EPI_ISL_796725, EPI_ISL_796727 to 796728, EPI_ISL_842643                                                                                                                                                                                                                                                                                                                                                                                                                                                                                                                                                                                                                                                                                                                                                                                                                                                          |                                                                                                                                                                                                                                                                                      |                                                                                                                 |                                                                                                                                                                                                                                                                                                                                                                                                                        |
| see above                                                                                                                                                                                                                                                                                                                                                                                                                                                                                                                                                                                                                                                                                                                                                                                                                                                                                                                                                                                                                                                                                                                                                                                                                                                                                                                                                                                                                                                                 | Department of Medical Microbiology, St. Olavs hospital                                                                                                                                                                                                                               | Norwegian Institute of Public Health, Department of Virology                                                    | Atiya R Ali; Hilde Elshaug; Hilde Vollan; Kamilla Heddeland Instefjord; Karoline Bragstad; Kathrine Stene-Johansen; Marie Paulsen Madsen; Olav Hungnes; Rasmus Riis Kopperud                                                                                                                                                                                                                                           |
| EPI_ISL_488840, EPI_ISL_488845, EPI_ISL_488847, EPI_ISL_488853 to 488856, EPI_ISL_488861, EPI_ISL_488863 to 488864, EPI_ISL_488872, EPI_ISL_492836, EPI_ISL_492838 to 492839, EPI_ISL_492841 to 492842, EPI_ISL_492848 to 492849, EPI_ISL_492853 to 492855, EPI_ISL_492857 to 492861, EPI_ISL_492867, EPI_ISL_492870 to 492871, EPI_ISL_492873, EPI_ISL_492875, EPI_ISL_492878, EPI_ISL_492881, EPI_ISL_492884, EPI_ISL_492886, EPI_ISL_492889, EPI_ISL_492891 to 492893, EPI_ISL_492895 to 492900, EPI_ISL_492903 to 492904, EPI_ISL_492907, EPI_ISL_492909 to 492910, EPI_ISL_492912 to 492913, EPI_ISL_492915, EPI_ISL_495081 to 495096, EPI_ISL_501557, EPI_ISL_501562, EPI_ISL_501602                                                                                                                                                                                                                                                                                                                                                                                                                                                                                                                                                                                                                                                                                                                                                                                |                                                                                                                                                                                                                                                                                      |                                                                                                                 |                                                                                                                                                                                                                                                                                                                                                                                                                        |
| see above                                                                                                                                                                                                                                                                                                                                                                                                                                                                                                                                                                                                                                                                                                                                                                                                                                                                                                                                                                                                                                                                                                                                                                                                                                                                                                                                                                                                                                                                 | Department of Medical Microbiology, Western Sussex Hospitals NHS Foundation Trust, St Richard's Hospital                                                                                                                                                                             | Wellcome Sanger Institute for the COVID-19 Genomics UK (COG-UK) consortium                                      | Cordelia Langford; David K. Jackson; Dominic Kwiatkowski; Ewan Harrison; Ian Johnston; John Sillitoe on behalf of the Wellcome Sanger Institute COVID-19 Surveillance Team ( <a href="http://www.sanger.ac.uk/covid-team">http://www.sanger.ac.uk/covid-team</a> ); Jonathan Lewis; Manasa Mutingwende; Michelle Erkiert; Olga Podplomyk; Paul Randall and Alex Alderton; Roberto Amato; Sarah Lowdon; Sonia Goncalves |
| EPI_ISL_454733                                                                                                                                                                                                                                                                                                                                                                                                                                                                                                                                                                                                                                                                                                                                                                                                                                                                                                                                                                                                                                                                                                                                                                                                                                                                                                                                                                                                                                                            | Department of Medical, Biotechnologies University of Siena                                                                                                                                                                                                                           | Department of Medical, Biotechnologies University of Siena                                                      | Anichini, G.; Cusi; G. and Santoro, F.; Gandolfo, C.; M.G.; Pinzauti, D.; Pozzi                                                                                                                                                                                                                                                                                                                                        |
| EPI_ISL_431102                                                                                                                                                                                                                                                                                                                                                                                                                                                                                                                                                                                                                                                                                                                                                                                                                                                                                                                                                                                                                                                                                                                                                                                                                                                                                                                                                                                                                                                            | Department of MicroBiology,Gandhi Medical College and Hospital,Secendrabad,Hyderabad,India                                                                                                                                                                                           | Department of Microbiology, Gandhi Medical College and Hospital, Secendrabad, Hyderabad                         | Amit A. Upadhyay; Anand Kumar K; Kalyani Putty; Muttineni Radhakrishna; Nagamani K; Pankaj Singh D; Raja Rao M; Rama Amara; Ravikumar P; Steven E. Bosinger; Sunitha P; Thrilik Chander B                                                                                                                                                                                                                              |
| EPI_ISL_431117                                                                                                                                                                                                                                                                                                                                                                                                                                                                                                                                                                                                                                                                                                                                                                                                                                                                                                                                                                                                                                                                                                                                                                                                                                                                                                                                                                                                                                                            | Department of Microbiology, Gandhi Medical College and Hospital, Secendrabad, Hyderabad, India                                                                                                                                                                                       | Department of Microbiology, Gandhi Medical College and Hospital, Secendrabad, Hyderabad, India                  | Amit A. Upadhyay; Anand Kumar K; Kalyani Putty; Muttineni Radhakrishna; Nagamani K; Pankaj Singh D; Raja Rao M; Rama Amara; Ravikumar P; Steven E.Bosinger; Sunitha P; Thrilik Chander B                                                                                                                                                                                                                               |
| EPI_ISL_516799                                                                                                                                                                                                                                                                                                                                                                                                                                                                                                                                                                                                                                                                                                                                                                                                                                                                                                                                                                                                                                                                                                                                                                                                                                                                                                                                                                                                                                                            | Department of Microbiology, The University of Hong Kong                                                                                                                                                                                                                              | Department of Microbiology, The University of Hong Kong                                                         | Kelvin K.W. To; Kwok-Yung Yuen                                                                                                                                                                                                                                                                                                                                                                                         |
| EPI_ISL_812968                                                                                                                                                                                                                                                                                                                                                                                                                                                                                                                                                                                                                                                                                                                                                                                                                                                                                                                                                                                                                                                                                                                                                                                                                                                                                                                                                                                                                                                            | Department of Molecular Medicine, University of Padova                                                                                                                                                                                                                               | Department of Molecular Medicine, University of Padova                                                          | Abate, D.; Barzon, L.; Besutti, V.; De Canale, E.; Del Vecchio, C.; Franchin, E.; Lavezzo, E.; Loregian, A.; M.C.; Manganelli, R.; Manuto, L.; Masi, G.; Onelia, F.; Pacenti, M.; Parisi, Rossi, L.; S. and Crisanti, A.; S.G.; Saluzzo, F.; Sciro, M.; Toppo; Trevisan, M.; Vanuzzo                                                                                                                                   |
| EPI_ISL_463741 to 463748                                                                                                                                                                                                                                                                                                                                                                                                                                                                                                                                                                                                                                                                                                                                                                                                                                                                                                                                                                                                                                                                                                                                                                                                                                                                                                                                                                                                                                                  | Department of Molecular Virology, Cyprus Institute of Neurology and Genetics                                                                                                                                                                                                         | Department of Molecular Virology, Cyprus Institute of Neurology and Genetics                                    | Christina Christodoulou; Christina Tryfonos; Dana Koptides; George Krashias; Jan Richter; Stavros Bashiardes                                                                                                                                                                                                                                                                                                           |
| EPI_ISL_853819 to 853821, EPI_ISL_854239                                                                                                                                                                                                                                                                                                                                                                                                                                                                                                                                                                                                                                                                                                                                                                                                                                                                                                                                                                                                                                                                                                                                                                                                                                                                                                                                                                                                                                  | Department of Pathology, Landeskrankenhaus Graz II, Medical University Graz                                                                                                                                                                                                          | Bergthaler laboratory, CeMM Research Center for Molecular Medicine of the Austrian Academy of Sciences          | Alexander Lercher; Alexandra Popa; Andreas Bergthaler; Anna Schedl; Benedikt Agerer; Christoph Bock; Jakob-Wendelin Genger; Jan Laine; Lukas Endler; Martin Senekowitsch; Michael Schuster; Thomas Penz                                                                                                                                                                                                                |
| EPI_ISL_425231 to 425257, EPI_ISL_425260, EPI_ISL_425262 to 425273, EPI_ISL_425275 to 425279, EPI_ISL_425281 to 425301, EPI_ISL_425303 to 425305, EPI_ISL_425307 to 425333, EPI_ISL_425335 to 425345, EPI_ISL_425347 to 425348, EPI_ISL_425351 to 425352, EPI_ISL_425354, EPI_ISL_425358 to 425371, EPI_ISL_425373 to 425385, EPI_ISL_425387 to 425404, EPI_ISL_425406 to 425409, EPI_ISL_425411 to 425418, EPI_ISL_425420 to 425421, EPI_ISL_425423 to 425438, EPI_ISL_425441 to 425460, EPI_ISL_433466 to 433487, EPI_ISL_433490 to 433497, EPI_ISL_433666 to 433686, EPI_ISL_433688 to 433707, EPI_ISL_433709 to 433715, EPI_ISL_433717 to 433739, EPI_ISL_433741 to 433746, EPI_ISL_433748 to 433765, EPI_ISL_433767 to 433776, EPI_ISL_433778 to 433806, EPI_ISL_433808 to 433837, EPI_ISL_433839 to 433971, EPI_ISL_433974 to 433983, EPI_ISL_433986 to 433997, EPI_ISL_433999 to 434006, EPI_ISL_434008 to 434021, EPI_ISL_434023 to 434041, EPI_ISL_434043 to 434058, EPI_ISL_434060 to 434062, EPI_ISL_438550 to 438571, EPI_ISL_438573 to 438610, EPI_ISL_438612 to 438654, EPI_ISL_438656 to 438683, EPI_ISL_438685 to 438687, EPI_ISL_438695 to 438730, EPI_ISL_438732 to 438748, EPI_ISL_444313 to 444342, EPI_ISL_444344, EPI_ISL_444346 to 444348, EPI_ISL_444350 to 444354, EPI_ISL_444356 to 444374, EPI_ISL_444377 to 444378, EPI_ISL_444380 to 444382, EPI_ISL_444384 to 444408, EPI_ISL_444410 to 444433, EPI_ISL_444435 to 444443, EPI_ISL_444446 to |                                                                                                                                                                                                                                                                                      |                                                                                                                 |                                                                                                                                                                                                                                                                                                                                                                                                                        |

444453, EPI\_ISL\_447945, EPI\_ISL\_447947 to 447981, EPI\_ISL\_447983, EPI\_ISL\_447987 to 447990, EPI\_ISL\_447993 to 448008, EPI\_ISL\_448010 to 448013, EPI\_ISL\_448015 to 448024, EPI\_ISL\_448026 to 448029, EPI\_ISL\_448032 to 448037, EPI\_ISL\_448039 to 448071, EPI\_ISL\_448074 to 448084, EPI\_ISL\_448086 to 448090, EPI\_ISL\_448092, EPI\_ISL\_448096 to 448103, EPI\_ISL\_448106 to 448115, EPI\_ISL\_452857 to 452874, EPI\_ISL\_452876 to 452901, EPI\_ISL\_452903 to 452906, EPI\_ISL\_452910 to 452930, EPI\_ISL\_452932, EPI\_ISL\_452934 to 452940, EPI\_ISL\_452942 to 452949, EPI\_ISL\_452951 to 452954, EPI\_ISL\_452957 to 452986, EPI\_ISL\_452988 to 453002, EPI\_ISL\_453004 to 453005, EPI\_ISL\_456677 to 456682, EPI\_ISL\_456686, EPI\_ISL\_456688, EPI\_ISL\_456692, EPI\_ISL\_456695 to 456706, EPI\_ISL\_456708 to 456725, EPI\_ISL\_456708 to 456737, EPI\_ISL\_456735 to 456743, EPI\_ISL\_456745, EPI\_ISL\_456747 to 456755, EPI\_ISL\_461546 to 461563, EPI\_ISL\_461565, EPI\_ISL\_461567 to 461568, EPI\_ISL\_461570 to 461585, EPI\_ISL\_461587 to 461588, EPI\_ISL\_473451 to 473493, EPI\_ISL\_473495 to 473503, EPI\_ISL\_473505 to 473507, EPI\_ISL\_477783 to 477785, EPI\_ISL\_477787 to 477816, EPI\_ISL\_477818 to 477819, EPI\_ISL\_483913 to 483915, EPI\_ISL\_490317 to 490321, EPI\_ISL\_490323 to 490328, EPI\_ISL\_499853, EPI\_ISL\_499855, EPI\_ISL\_499905, EPI\_ISL\_499906, EPI\_ISL\_499968 to 499973, EPI\_ISL\_512330 to 512335, EPI\_ISL\_514443 to 514451, EPI\_ISL\_516990 to 517000, EPI\_ISL\_529224 to 529225, EPI\_ISL\_529236, EPI\_ISL\_529257, EPI\_ISL\_529265, EPI\_ISL\_529269, EPI\_ISL\_529283, EPI\_ISL\_529299, EPI\_ISL\_529445, EPI\_ISL\_529656 to 529660, EPI\_ISL\_549374, EPI\_ISL\_549386, EPI\_ISL\_549388 to 549394, EPI\_ISL\_572471 to 572472, EPI\_ISL\_572484, EPI\_ISL\_572519, EPI\_ISL\_572524, EPI\_ISL\_572541, EPI\_ISL\_572592, EPI\_ISL\_572616, EPI\_ISL\_572642, EPI\_ISL\_572779, EPI\_ISL\_572792, EPI\_ISL\_572851 to 572852, EPI\_ISL\_572862 to 572868, EPI\_ISL\_573138 to 573151, EPI\_ISL\_573153, EPI\_ISL\_576897 to 576902, EPI\_ISL\_576906 to 576919, EPI\_ISL\_584283, EPI\_ISL\_584286 to 584291, EPI\_ISL\_584294 to 584302, EPI\_ISL\_584304 to 584307, EPI\_ISL\_584309 to 584314, EPI\_ISL\_584316 to 584318, EPI\_ISL\_584321 to 584323, EPI\_ISL\_611593, EPI\_ISL\_611751, EPI\_ISL\_611938, EPI\_ISL\_611964 to 611967, EPI\_ISL\_612007, EPI\_ISL\_612034, EPI\_ISL\_612099, EPI\_ISL\_612106, EPI\_ISL\_612123, EPI\_ISL\_612186, EPI\_ISL\_612262 to 612283, EPI\_ISL\_637261 to 637272, EPI\_ISL\_637275 to 637277, EPI\_ISL\_637281 to 637282, EPI\_ISL\_637287, EPI\_ISL\_637292, EPI\_ISL\_637294, EPI\_ISL\_637299, EPI\_ISL\_637308, EPI\_ISL\_637310, EPI\_ISL\_637314 to 637318, EPI\_ISL\_637324, EPI\_ISL\_637328, EPI\_ISL\_637331, EPI\_ISL\_637334 to 637335, EPI\_ISL\_637340 to 637341, EPI\_ISL\_637345, EPI\_ISL\_637348, EPI\_ISL\_637353 to 637355, EPI\_ISL\_637357, EPI\_ISL\_637360, EPI\_ISL\_637362 to 637368, EPI\_ISL\_637384, EPI\_ISL\_637386, EPI\_ISL\_637388 to 637389, EPI\_ISL\_637392, EPI\_ISL\_637394, EPI\_ISL\_637397, EPI\_ISL\_637400, EPI\_ISL\_637403 to 637408, EPI\_ISL\_637410, EPI\_ISL\_637413 to 637418, EPI\_ISL\_637420 to 637421, EPI\_ISL\_637424 to 637426, EPI\_ISL\_637428 to 637431, EPI\_ISL\_637433, EPI\_ISL\_637435, EPI\_ISL\_637440, EPI\_ISL\_637451, EPI\_ISL\_637456, EPI\_ISL\_637460, EPI\_ISL\_637462 to 637465, EPI\_ISL\_637468 to 637490, EPI\_ISL\_637500 to 637501, EPI\_ISL\_637503 to 637519, EPI\_ISL\_637526 to 637527, EPI\_ISL\_637529 to 637530, EPI\_ISL\_637545, EPI\_ISL\_637547, EPI\_ISL\_637549, EPI\_ISL\_637552, EPI\_ISL\_637554, EPI\_ISL\_637560, EPI\_ISL\_637562 to 637579, EPI\_ISL\_637583, EPI\_ISL\_637590 to 637592, EPI\_ISL\_637595, EPI\_ISL\_637598, EPI\_ISL\_637613, EPI\_ISL\_637620, EPI\_ISL\_637623 to 637624, EPI\_ISL\_637628 to 637638, EPI\_ISL\_637640 to 637642, EPI\_ISL\_637644 to 637648, EPI\_ISL\_637650 to 637654, EPI\_ISL\_637656 to 637658, EPI\_ISL\_637662 to 637666, EPI\_ISL\_637668 to 637673, EPI\_ISL\_637676 to 637678, EPI\_ISL\_637680 to 637713, EPI\_ISL\_637716, EPI\_ISL\_637721 to 637725, EPI\_ISL\_637727 to 637764, EPI\_ISL\_637766 to 637779, EPI\_ISL\_637801 to 637852, EPI\_ISL\_637856, EPI\_ISL\_637859 to 637860, EPI\_ISL\_637873, EPI\_ISL\_637877, EPI\_ISL\_637880, EPI\_ISL\_637888, EPI\_ISL\_637890, EPI\_ISL\_637903, EPI\_ISL\_637906, EPI\_ISL\_637913, EPI\_ISL\_637916, EPI\_ISL\_637936, EPI\_ISL\_637938 to 637940, EPI\_ISL\_637942, EPI\_ISL\_637947, EPI\_ISL\_637953, EPI\_ISL\_637955, EPI\_ISL\_637966 to 637967, EPI\_ISL\_637974, EPI\_ISL\_637978, EPI\_ISL\_637980, EPI\_ISL\_637982 to 637983, EPI\_ISL\_638001, EPI\_ISL\_638008, EPI\_ISL\_638013 to 638014, EPI\_ISL\_638016, EPI\_ISL\_638018 to 638020, EPI\_ISL\_638027, EPI\_ISL\_638029 to 638030, EPI\_ISL\_638038 to 638040, EPI\_ISL\_638066 to 638069, EPI\_ISL\_638071 to 638072, EPI\_ISL\_638079 to 638083, EPI\_ISL\_638131 to 638133, EPI\_ISL\_638138, EPI\_ISL\_638140 to 638143, EPI\_ISL\_638146, EPI\_ISL\_638165 to 638167, EPI\_ISL\_638169, EPI\_ISL\_638174, EPI\_ISL\_638177 to 638205, EPI\_ISL\_638208 to 638248, EPI\_ISL\_638258 to 638264, EPI\_ISL\_638293 to 638299, EPI\_ISL\_638302 to 638314, EPI\_ISL\_638316 to 638325, EPI\_ISL\_638327 to 638330, EPI\_ISL\_638332, EPI\_ISL\_638334 to 638335, EPI\_ISL\_638337 to 638425, EPI\_ISL\_638427 to 638448, EPI\_ISL\_638614 to 638681, EPI\_ISL\_638731 to 638735, EPI\_ISL\_638895 to 638910, EPI\_ISL\_638914, EPI\_ISL\_638916 to 638927, EPI\_ISL\_638936 to 638943, EPI\_ISL\_639003 to 639005, EPI\_ISL\_639624 to 639625, EPI\_ISL\_650122, EPI\_ISL\_650129, EPI\_ISL\_650133, EPI\_ISL\_650143, EPI\_ISL\_650149, EPI\_ISL\_650200, EPI\_ISL\_650217, EPI\_ISL\_650228, EPI\_ISL\_650236, EPI\_ISL\_650239 to 650240, EPI\_ISL\_650273, EPI\_ISL\_650364 to 650365, EPI\_ISL\_650376, EPI\_ISL\_650390 to 650391, EPI\_ISL\_650396 to 650398, EPI\_ISL\_650400, EPI\_ISL\_650481, EPI\_ISL\_650553, EPI\_ISL\_650562, EPI\_ISL\_650573 to 650574, EPI\_ISL\_650580, EPI\_ISL\_650583, EPI\_ISL\_650589 to 650596, EPI\_ISL\_650609, EPI\_ISL\_650612, EPI\_ISL\_650614 to 650617, EPI\_ISL\_650626 to 650633, EPI\_ISL\_650661, EPI\_ISL\_650664, EPI\_ISL\_650698, EPI\_ISL\_650707 to 650708, EPI\_ISL\_650774, EPI\_ISL\_650836, EPI\_ISL\_650899, EPI\_ISL\_650910, EPI\_ISL\_650916, EPI\_ISL\_650922, EPI\_ISL\_650951 to 650952, EPI\_ISL\_650959, EPI\_ISL\_650962, EPI\_ISL\_650969 to 650972, EPI\_ISL\_650978, EPI\_ISL\_650983, EPI\_ISL\_650985 to 650986, EPI\_ISL\_650988 to 650994, EPI\_ISL\_651001 to 651010, EPI\_ISL\_651014 to 651047, EPI\_ISL\_651049 to 651052, EPI\_ISL\_651080 to 651081, EPI\_ISL\_651122, EPI\_ISL\_651136, EPI\_ISL\_651186, EPI\_ISL\_651276, EPI\_ISL\_651278, EPI\_ISL\_651281, EPI\_ISL\_651292, EPI\_ISL\_651302, EPI\_ISL\_651346, EPI\_ISL\_651348, EPI\_ISL\_651360, EPI\_ISL\_651363, EPI\_ISL\_651365, EPI\_ISL\_651370, EPI\_ISL\_651373 to 651383, EPI\_ISL\_651423, EPI\_ISL\_651435 to 651436, EPI\_ISL\_651488 to 651490, EPI\_ISL\_651492, EPI\_ISL\_651542, EPI\_ISL\_651550 to 651582, EPI\_ISL\_651653 to 651657, EPI\_ISL\_651659, EPI\_ISL\_651662, EPI\_ISL\_651664, EPI\_ISL\_651666 to 651670, EPI\_ISL\_651672 to 651677, EPI\_ISL\_651679 to 651681, EPI\_ISL\_651683 to 651698, EPI\_ISL\_651702 to 651714, EPI\_ISL\_652157 to 652170, EPI\_ISL\_652172 to 652179, EPI\_ISL\_652286 to 652288, EPI\_ISL\_664120, EPI\_ISL\_664139 to 664141, EPI\_ISL\_664143, EPI\_ISL\_664149 to 664150, EPI\_ISL\_664167, EPI\_ISL\_664198 to 664200, EPI\_ISL\_664217, EPI\_ISL\_664221, EPI\_ISL\_664234, EPI\_ISL\_664237, EPI\_ISL\_664249, EPI\_ISL\_664282, EPI\_ISL\_664286, EPI\_ISL\_664291, EPI\_ISL\_664304, EPI\_ISL\_664316 to 664317, EPI\_ISL\_664326, EPI\_ISL\_664346, EPI\_ISL\_664397, EPI\_ISL\_664421 to 664422, EPI\_ISL\_664428, EPI\_ISL\_664432 to 664434, EPI\_ISL\_664446, EPI\_ISL\_664451, EPI\_ISL\_664453 to 664455, EPI\_ISL\_664470, EPI\_ISL\_664514, EPI\_ISL\_664516, EPI\_ISL\_664527 to 664538, EPI\_ISL\_664542 to 664543, EPI\_ISL\_664546 to 664555, EPI\_ISL\_664567 to 664582, EPI\_ISL\_664584 to 664591, EPI\_ISL\_664598 to 664599, EPI\_ISL\_664601, EPI\_ISL\_664610, EPI\_ISL\_664616, EPI\_ISL\_664622, EPI\_ISL\_664625, EPI\_ISL\_664627, EPI\_ISL\_664631, EPI\_ISL\_664635, EPI\_ISL\_664655 to 664656, EPI\_ISL\_664659 to 664660, EPI\_ISL\_664662, EPI\_ISL\_664666, EPI\_ISL\_664668, EPI\_ISL\_664679, EPI\_ISL\_664721, EPI\_ISL\_664731, EPI\_ISL\_664748 to 664749, EPI\_ISL\_664765 to 664766, EPI\_ISL\_664768 to 664836, EPI\_ISL\_664941 to 664986, EPI\_ISL\_664988 to 664990, EPI\_ISL\_664992 to 665022, EPI\_ISL\_678832 to 678851, EPI\_ISL\_678853 to 678854, EPI\_ISL\_678856 to 678865, EPI\_ISL\_678867 to 678887, EPI\_ISL\_678889 to 678915, EPI\_ISL\_679134 to 679147, EPI\_ISL\_679149 to 679221, EPI\_ISL\_679223 to 679224, EPI\_ISL\_679226, EPI\_ISL\_679228, EPI\_ISL\_679230, EPI\_ISL\_679232, EPI\_ISL\_679234, EPI\_ISL\_679236, EPI\_ISL\_679238, EPI\_ISL\_679242, EPI\_ISL\_679244, EPI\_ISL\_679246, EPI\_ISL\_680037 to 680039, EPI\_ISL\_680041 to 680084, EPI\_ISL\_680086 to 680100, EPI\_ISL\_680571 to 680577, EPI\_ISL\_681260, EPI\_ISL\_702474, EPI\_ISL\_702500, EPI\_ISL\_702561, EPI\_ISL\_702703, EPI\_ISL\_702723, EPI\_ISL\_702734, EPI\_ISL\_702782, EPI\_ISL\_702787, EPI\_ISL\_702834, EPI\_ISL\_702847 to 702848, EPI\_ISL\_702860, EPI\_ISL\_702876, EPI\_ISL\_702883, EPI\_ISL\_702886, EPI\_ISL\_702891, EPI\_ISL\_702971, EPI\_ISL\_702977, EPI\_ISL\_703032, EPI\_ISL\_703076, EPI\_ISL\_703093, EPI\_ISL\_703115, EPI\_ISL\_703118, EPI\_ISL\_703127, EPI\_ISL\_703213, EPI\_ISL\_703238, EPI\_ISL\_703406, EPI\_ISL\_703432, EPI\_ISL\_703435, EPI\_ISL\_703438, EPI\_ISL\_703440, EPI\_ISL\_703451, EPI\_ISL\_703457 to 703459, EPI\_ISL\_703461, EPI\_ISL\_703463 to 703464, EPI\_ISL\_703466, EPI\_ISL\_703468 to 703469, EPI\_ISL\_703471, EPI\_ISL\_703473 to 703474, EPI\_ISL\_703476, EPI\_ISL\_703477 to 703478, EPI\_ISL\_703479, EPI\_ISL\_703481, EPI\_ISL\_703482 to 703483, EPI\_ISL\_703484, EPI\_ISL\_703485 to 703486, EPI\_ISL\_703487 to 703488, EPI\_ISL\_703489 to 703490, EPI\_ISL\_703491 to 703492, EPI\_ISL\_703493 to 703494, EPI\_ISL\_703495 to 703496, EPI\_ISL\_703497 to 703498, EPI\_ISL\_703499 to 703500, EPI\_ISL\_703501 to 703502, EPI\_ISL\_703503 to 703504, EPI\_ISL\_703505 to 703506, EPI\_ISL\_703507 to 703508, EPI\_ISL\_703509 to 703510, EPI\_ISL\_703511 to 703512, EPI\_ISL\_703513 to 703514, EPI\_ISL\_703515 to 703516, EPI\_ISL\_703517 to 703518, EPI\_ISL\_703519 to 703520, EPI\_ISL\_703521 to 703522, EPI\_ISL\_703523 to 703524, EPI\_ISL\_703525 to 703526, EPI\_ISL\_703527 to 703528, EPI\_ISL\_703529 to 703530, EPI\_ISL\_703531 to 703532, EPI\_ISL\_703533 to 703534, EPI\_ISL\_703535 to 703536, EPI\_ISL\_703537 to 703538, EPI\_ISL\_703539 to 703540, EPI\_ISL\_703541 to 703542, EPI\_ISL\_703543 to 703544, EPI\_ISL\_703545 to 703546, EPI\_ISL\_703547 to 703548, EPI\_ISL\_703549 to 703550, EPI\_ISL\_703551 to 703552, EPI\_ISL\_703553 to 703554, EPI\_ISL\_703555 to 703556, EPI\_ISL\_703557 to 703558, EPI\_ISL\_703559 to 703560, EPI\_ISL\_703561 to 703562, EPI\_ISL\_703563 to 703564, EPI\_ISL\_703565 to 703566, EPI\_ISL\_703567 to 703568, EPI\_ISL\_703569 to 703570, EPI\_ISL\_703571 to 703572, EPI\_ISL\_703573 to 703574, EPI\_ISL\_703575 to 703576, EPI\_ISL\_703577 to 703578, EPI\_ISL\_703579 to 703580, EPI\_ISL\_703581 to 703582, EPI\_ISL\_703583 to 703584, EPI\_ISL\_703585 to 703586, EPI\_ISL\_703587 to 703588, EPI\_ISL\_703589 to 703590, EPI\_ISL\_703591 to 703592, EPI\_ISL\_703593 to 703594, EPI\_ISL\_703595 to 703596, EPI\_ISL\_703597 to 703598, EPI\_ISL\_703599 to 703600, EPI\_ISL\_703601 to 703602, EPI\_ISL\_703603 to 703604, EPI\_ISL\_703605 to 703606, EPI\_ISL\_703607 to 703608, EPI\_ISL\_703609 to 703610, EPI\_ISL\_703611 to 703612, EPI\_ISL\_703613 to 703614, EPI\_ISL\_703615 to 703616, EPI\_ISL\_703617 to 703618, EPI\_ISL\_703619 to 703620, EPI\_ISL\_703621 to 703622, EPI\_ISL\_703623 to 703624, EPI\_ISL\_703625 to 703626, EPI\_ISL\_703627 to 703628, EPI\_ISL\_703629 to 703630, EPI\_ISL\_703631 to 703632, EPI\_ISL\_703633 to 703634, EPI\_ISL\_703635 to 703636, EPI\_ISL\_703637 to 703638, EPI\_ISL\_703639 to 703640, EPI\_ISL\_703641 to 703642, EPI\_ISL\_703643 to 703644, EPI\_ISL\_703645 to 703646, EPI\_ISL\_703647 to 703648, EPI\_ISL\_703649 to 703650, EPI\_ISL\_703651 to 703652, EPI\_ISL\_703653 to 703654, EPI\_ISL\_703655 to 703656, EPI\_ISL\_703657 to 703658, EPI\_ISL\_703659 to 703660, EPI\_ISL\_703661 to 703662, EPI\_ISL\_703663 to 703664, EPI\_ISL\_703665 to 703666, EPI\_ISL\_703667 to 703668, EPI\_ISL\_703669 to 703670, EPI\_ISL\_703671 to 703672, EPI\_ISL\_703673 to 703674, EPI\_ISL\_703675 to 703676, EPI\_ISL\_703677 to 703678, EPI\_ISL\_703679 to 703680, EPI\_ISL\_703681 to 703682, EPI\_ISL\_703683 to 703684, EPI\_ISL\_703685 to 703686, EPI\_ISL\_703687 to 703688, EPI\_ISL\_703689 to 703690, EPI\_ISL\_703691 to 703692, EPI\_ISL\_703693 to 703694, EPI\_ISL\_703695 to 703696, EPI\_ISL\_703697 to 703698, EPI\_ISL\_703699 to 703700, EPI\_ISL\_703701 to 703702, EPI\_ISL\_703703 to 703704, EPI\_ISL\_703705 to 703706, EPI\_ISL\_703707 to 703708, EPI\_ISL\_703709 to 703710, EPI\_ISL\_703711 to 703712, EPI\_ISL\_703713 to 703714, EPI\_ISL\_703715 to 703716, EPI\_ISL\_703717 to 703718, EPI\_ISL\_703719 to 703720, EPI\_ISL\_703721 to 703722, EPI\_ISL\_703723 to 703724, EPI\_ISL\_703725 to 703726, EPI\_ISL\_703727 to 703728, EPI\_ISL\_703729 to 703730, EPI\_ISL\_703731 to 703732, EPI\_ISL\_703733 to 703734, EPI\_ISL\_703735 to 703736, EPI\_ISL\_703737 to 703738, EPI\_ISL\_703739 to 703740, EPI\_ISL\_703741 to 703742, EPI\_ISL\_703743 to 703744, EPI\_ISL\_703745 to 703746, EPI\_ISL\_703747 to 703748, EPI\_ISL\_703749 to 703750, EPI\_ISL\_703751 to 703752, EPI\_ISL\_703753 to 703754, EPI\_ISL\_703755 to 703756, EPI\_ISL\_703757 to 703758, EPI\_ISL\_703759 to 703760, EPI\_ISL\_703761 to 703762, EPI\_ISL\_703763 to 703764, EPI\_ISL\_703765 to 703766, EPI\_ISL\_703767 to 703768, EPI\_ISL\_703769 to 703770, EPI\_ISL\_703771 to 703772, EPI\_ISL\_703773 to 703774, EPI\_ISL\_703775 to 703776, EPI\_ISL\_703777 to 703778, EPI\_ISL\_703779 to 703780, EPI\_ISL\_703781 to 703782, EPI\_ISL\_703783 to 703784, EPI\_ISL\_703785 to 703786, EPI\_ISL\_703787 to 703788, EPI\_ISL\_703789 to 703790, EPI\_ISL\_703791 to 703792, EPI\_ISL\_703793 to 703794, EPI\_ISL\_703795 to 703796, EPI\_ISL\_703797 to 703798, EPI\_ISL\_703799 to 703800, EPI\_ISL\_703801 to 703802, EPI\_ISL\_703803 to 703804, EPI\_ISL\_703805 to 703806, EPI\_ISL\_703807 to 703808, EPI\_ISL\_703809 to 703810, EPI\_ISL\_703811 to 703812, EPI\_ISL\_703813 to 703814, EPI\_ISL\_703815 to 703816, EPI\_ISL\_703817 to 703818, EPI\_ISL\_703819 to 703820, EPI\_ISL\_703821 to 703822, EPI\_ISL\_703823 to 703824, EPI\_ISL\_703825 to 703826, EPI\_ISL\_703827 to 703828, EPI\_ISL\_703829 to 703830, EPI\_ISL\_703831 to 703832, EPI\_ISL\_703833 to 703834, EPI\_ISL\_703835 to 703836, EPI\_ISL\_703837 to 703838, EPI\_ISL\_703839 to 703840, EPI\_ISL\_703841 to 703842, EPI\_ISL\_703843 to 703844, EPI\_ISL\_703845 to 703846, EPI\_ISL\_703847 to 703848, EPI\_ISL\_703849 to 703850, EPI\_ISL\_703851 to 703852, EPI\_ISL\_703853 to 703854, EPI\_ISL\_703855 to 703856, EPI\_ISL\_703857 to 703858, EPI\_ISL\_703859 to 703860, EPI\_ISL\_703861 to 703862, EPI\_ISL\_703863 to 703864, EPI\_ISL\_703865 to 703866, EPI\_ISL\_703867 to 703868, EPI\_ISL\_703869 to 703870, EPI\_ISL\_703871 to 703872, EPI\_ISL\_703873 to 703874, EPI\_ISL\_703875 to 703876, EPI\_ISL\_703877 to 703878, EPI\_ISL\_703879 to 703880, EPI\_ISL\_703881 to 703882, EPI\_ISL\_703883 to 703884, EPI\_ISL\_703885 to 703886, EPI\_ISL\_703887 to 703888, EPI\_ISL\_703889 to 703890, EPI\_ISL\_703891 to 703892, EPI\_ISL\_703893 to 703894, EPI\_ISL\_703895 to 703896, EPI\_ISL\_703897 to 703898, EPI\_ISL\_703899 to 703900, EPI\_ISL\_703901 to 703902, EPI\_ISL\_703903 to 703904, EPI\_ISL\_703905 to 703906, EPI\_ISL\_703907 to 703908, EPI\_ISL\_703909 to 703910, EPI\_ISL\_703911 to 703912, EPI\_ISL\_703913 to 703914, EPI\_ISL\_703915 to 703916, EPI\_ISL\_703917 to 703918, EPI\_ISL\_703919 to 703920, EPI\_ISL\_703921 to 703922, EPI\_ISL\_703923 to 703924, EPI\_ISL\_703925 to 703926, EPI\_ISL\_703927 to 703928, EPI\_ISL\_703929 to 703930, EPI\_ISL\_703931 to 703932, EPI\_ISL\_703933 to 703934, EPI\_ISL\_703935 to 703936, EPI\_ISL\_703937 to 703938, EPI\_ISL\_703939 to 703940, EPI\_ISL\_703941 to 703942, EPI\_ISL\_703943 to 703944, EPI\_ISL\_703945 to 703946, EPI\_ISL\_703947 to 703948, EPI\_ISL\_703949 to 703950, EPI\_ISL\_703951 to 703952, EPI\_ISL\_703953 to 703954, EPI\_ISL\_703955 to 703956, EPI\_ISL\_703957 to 703958, EPI\_ISL\_703959 to 703960, EPI\_ISL\_703961 to 703962, EPI\_ISL\_703963 to 703964, EPI\_ISL\_703965 to 703966, EPI\_ISL\_703967 to 703968, EPI\_ISL\_703969 to 703970, EPI\_ISL\_703971 to 703972, EPI\_ISL\_703973 to 703974, EPI\_ISL\_703975 to 703976, EPI\_ISL\_703977 to 703978, EPI\_ISL\_703979 to 703980, EPI\_ISL\_703981 to 703982, EPI\_ISL\_703983 to 703984, EPI\_ISL\_703985 to 703986, EPI\_ISL\_703987 to 703988, EPI\_ISL\_703989 to 703990, EPI\_ISL\_703991 to 703992, EPI\_ISL\_703993 to 703994, EPI\_ISL\_703995 to 703996, EPI\_ISL\_703997 to 703998, EPI\_ISL\_703999 to 704000, EPI\_ISL\_704001 to 704002, EPI\_ISL\_704003 to 704004, EPI\_ISL\_704005 to 704006, EPI\_ISL\_704007 to 704008, EPI\_ISL\_704009 to 704010, EPI\_ISL\_704011 to 704012, EPI\_ISL\_704013 to 704014, EPI\_ISL\_704015 to 704016, EPI\_ISL\_704017 to 704018, EPI\_ISL\_704019 to 704020, EPI\_ISL\_704021 to 704022, EPI\_ISL\_704023 to 704024, EPI\_ISL\_704025 to 704026, EPI\_ISL\_704027 to 704028, EPI\_ISL\_704029 to 70

| (COG-UK) consortium                                                                                                                                                                                                                                                                                                                                                                                                                                                                                                                                                                                                                                                                                                                                                                                                                                                                                                                                                                                                                                                                                                                                                                                                                                                                                                                                                                                                                                                                                                                                                                                                                                                                                                                                                                                                                                                                                                                                                                                                                                                                                                                                                                                                                                                                                                                                                                                                                                                                                                                                                                                                                                                                                                                                                                                                                                                                                                                                                                                                                                                                                                                                                                                                                                                                                                                                                                                                                                                                                                                                                                                                                                                                                                                                                                                                                                                                                                                                                                                                                                                                                                                                                                                                                                                                                                                                                                                                                                                                                                                                                                                                                                                                                                                                                                                                                                                                                                                                                                                                                                                                                                                                                                                                                                                                                                                                                                                                                                                                                                                                                                                                                                                                                                                                                                                                                                                                                                                                                                                                                                                                                                                                                                                                                                                                                                                                                                                                                                                                                                                                                                                                                                                                                                                                                                                                                                                                                                                                                                                                                                                                                                                                                                                                                                                                                                                                                                                                                                                                                                                                                                                                                                                                                                                                                                                                                                                                                                                                                                                                                                                                                                                                                                                                                                                                                                                                                                                                                                                                                                                                                                                                                                                                                                                                                                                                                                                                                                                                                                                                                                                                                                                                                                                                                                                                                                                                                                                                                                                                                                                                                                                                                                                                                                                                                                                                                                                                                                                                                                                                                                                                                                                                                                                                                                                                                                                                                                                                                                                                                                                                                                                                                                                                                                                                                                                                                                                                                                                                                                                                                                                                                                                                                                                                                                                                                                                                                                                                                                                                                                                                                                                                                                                                                                                                                                                                                                                                                                                                                                                                                                                                                                                                                                                                                                                                                                                                                                                                                                                                                                                                                                                                                                                                                                                                                                                                                                                                                                                                                                                                                                                                                                                                                                                                                                                                                                                                                                                                            |                                                                                                                                          |                                                                                                                                                        | Fahad A Khokhar; Grant Hall; Ian Goodfellow; Ian Johnston; John Sillitoe on behalf of the Wellcome Sanger Institute COVID-19 Surveillance Team; John Sillitoe on behalf of the Wellcome Sanger Institute COVID-19 Surveillance Team (http://www.sanger.ac.uk/covid-team); Laura G Caffer; Luke W Meredith; M. Estée Török; Martin D. Curran; Myra Hosmillo; Roberto Amato; Sarah L. Caddy; Sonia Gonçalves; Theresa Feltwell; William L. Hamilton; and Alex Alderton                                                                                         |
|--------------------------------------------------------------------------------------------------------------------------------------------------------------------------------------------------------------------------------------------------------------------------------------------------------------------------------------------------------------------------------------------------------------------------------------------------------------------------------------------------------------------------------------------------------------------------------------------------------------------------------------------------------------------------------------------------------------------------------------------------------------------------------------------------------------------------------------------------------------------------------------------------------------------------------------------------------------------------------------------------------------------------------------------------------------------------------------------------------------------------------------------------------------------------------------------------------------------------------------------------------------------------------------------------------------------------------------------------------------------------------------------------------------------------------------------------------------------------------------------------------------------------------------------------------------------------------------------------------------------------------------------------------------------------------------------------------------------------------------------------------------------------------------------------------------------------------------------------------------------------------------------------------------------------------------------------------------------------------------------------------------------------------------------------------------------------------------------------------------------------------------------------------------------------------------------------------------------------------------------------------------------------------------------------------------------------------------------------------------------------------------------------------------------------------------------------------------------------------------------------------------------------------------------------------------------------------------------------------------------------------------------------------------------------------------------------------------------------------------------------------------------------------------------------------------------------------------------------------------------------------------------------------------------------------------------------------------------------------------------------------------------------------------------------------------------------------------------------------------------------------------------------------------------------------------------------------------------------------------------------------------------------------------------------------------------------------------------------------------------------------------------------------------------------------------------------------------------------------------------------------------------------------------------------------------------------------------------------------------------------------------------------------------------------------------------------------------------------------------------------------------------------------------------------------------------------------------------------------------------------------------------------------------------------------------------------------------------------------------------------------------------------------------------------------------------------------------------------------------------------------------------------------------------------------------------------------------------------------------------------------------------------------------------------------------------------------------------------------------------------------------------------------------------------------------------------------------------------------------------------------------------------------------------------------------------------------------------------------------------------------------------------------------------------------------------------------------------------------------------------------------------------------------------------------------------------------------------------------------------------------------------------------------------------------------------------------------------------------------------------------------------------------------------------------------------------------------------------------------------------------------------------------------------------------------------------------------------------------------------------------------------------------------------------------------------------------------------------------------------------------------------------------------------------------------------------------------------------------------------------------------------------------------------------------------------------------------------------------------------------------------------------------------------------------------------------------------------------------------------------------------------------------------------------------------------------------------------------------------------------------------------------------------------------------------------------------------------------------------------------------------------------------------------------------------------------------------------------------------------------------------------------------------------------------------------------------------------------------------------------------------------------------------------------------------------------------------------------------------------------------------------------------------------------------------------------------------------------------------------------------------------------------------------------------------------------------------------------------------------------------------------------------------------------------------------------------------------------------------------------------------------------------------------------------------------------------------------------------------------------------------------------------------------------------------------------------------------------------------------------------------------------------------------------------------------------------------------------------------------------------------------------------------------------------------------------------------------------------------------------------------------------------------------------------------------------------------------------------------------------------------------------------------------------------------------------------------------------------------------------------------------------------------------------------------------------------------------------------------------------------------------------------------------------------------------------------------------------------------------------------------------------------------------------------------------------------------------------------------------------------------------------------------------------------------------------------------------------------------------------------------------------------------------------------------------------------------------------------------------------------------------------------------------------------------------------------------------------------------------------------------------------------------------------------------------------------------------------------------------------------------------------------------------------------------------------------------------------------------------------------------------------------------------------------------------------------------------------------------------------------------------------------------------------------------------------------------------------------------------------------------------------------------------------------------------------------------------------------------------------------------------------------------------------------------------------------------------------------------------------------------------------------------------------------------------------------------------------------------------------------------------------------------------------------------------------------------------------------------------------------------------------------------------------------------------------------------------------------------------------------------------------------------------------------------------------------------------------------------------------------------------------------------------------------------------------------------------------------------------------------------------------------------------------------------------------------------------------------------------------------------------------------------------------------------------------------------------------------------------------------------------------------------------------------------------------------------------------------------------------------------------------------------------------------------------------------------------------------------------------------------------------------------------------------------------------------------------------------------------------------------------------------------------------------------------------------------------------------------------------------------------------------------------------------------------------------------------------------------------------------------------------------------------------------------------------------------------------------------------------------------------------------------------------------------------------------------------------------------------------------------------------------------------------------------------------------------------------------------------------------------------------------------------------------------------------------------------------------------------------------------------------------------------------------------------------------------------------------------------------------------------------------------------------------------------------------------------------------------------------------------------------------------------------------------------------------------------------------------------------------------------------------------------------------------------------------------------------------------------------------------------------------------------------------------------------------------------------------------------------------------------------------------------------------------------------------------------------------------------------------------------------------------------------------------------------------------------------------------------------------------------------------------------------------------------------------------------------------------------------------------------------------------------------------------------------------------------------------------------------------------------------------------------------------------------------------------------------------------------------------------------------------------------------------------------------------------------------------------------------------------------------------------------------------------------------------------------------------------------------------------------------------------------------------------------------------------------------------------------------------------------------------------------------------------------------------------------------------------------------------------------------------------------------------------------------------------------------------------------------------------------------------------------------------------------------------------------------------------------------------------------------------------------------------------------------------------------------------------------------------------------------------------------------------------------------------------------------------------------------------------------------------------------------------------------------------------------------------------------------------------------------------------------------------|------------------------------------------------------------------------------------------------------------------------------------------|--------------------------------------------------------------------------------------------------------------------------------------------------------|--------------------------------------------------------------------------------------------------------------------------------------------------------------------------------------------------------------------------------------------------------------------------------------------------------------------------------------------------------------------------------------------------------------------------------------------------------------------------------------------------------------------------------------------------------------|
| EPI_ISL_576146 to 576149                                                                                                                                                                                                                                                                                                                                                                                                                                                                                                                                                                                                                                                                                                                                                                                                                                                                                                                                                                                                                                                                                                                                                                                                                                                                                                                                                                                                                                                                                                                                                                                                                                                                                                                                                                                                                                                                                                                                                                                                                                                                                                                                                                                                                                                                                                                                                                                                                                                                                                                                                                                                                                                                                                                                                                                                                                                                                                                                                                                                                                                                                                                                                                                                                                                                                                                                                                                                                                                                                                                                                                                                                                                                                                                                                                                                                                                                                                                                                                                                                                                                                                                                                                                                                                                                                                                                                                                                                                                                                                                                                                                                                                                                                                                                                                                                                                                                                                                                                                                                                                                                                                                                                                                                                                                                                                                                                                                                                                                                                                                                                                                                                                                                                                                                                                                                                                                                                                                                                                                                                                                                                                                                                                                                                                                                                                                                                                                                                                                                                                                                                                                                                                                                                                                                                                                                                                                                                                                                                                                                                                                                                                                                                                                                                                                                                                                                                                                                                                                                                                                                                                                                                                                                                                                                                                                                                                                                                                                                                                                                                                                                                                                                                                                                                                                                                                                                                                                                                                                                                                                                                                                                                                                                                                                                                                                                                                                                                                                                                                                                                                                                                                                                                                                                                                                                                                                                                                                                                                                                                                                                                                                                                                                                                                                                                                                                                                                                                                                                                                                                                                                                                                                                                                                                                                                                                                                                                                                                                                                                                                                                                                                                                                                                                                                                                                                                                                                                                                                                                                                                                                                                                                                                                                                                                                                                                                                                                                                                                                                                                                                                                                                                                                                                                                                                                                                                                                                                                                                                                                                                                                                                                                                                                                                                                                                                                                                                                                                                                                                                                                                                                                                                                                                                                                                                                                                                                                                                                                                                                                                                                                                                                                                                                                                                                                                                                                                                                                                                       | Department of Respiratory & Other Viral Infections of L.V. Gromashevsky Institute of Epidemiology & Infectious Diseases NAMS of Ukraine  | Department of Respiratory & Other Viral Infections of L.V. Gromashevsky Institute of Epidemiology & Infectious Diseases NAMS of Ukraine, JSC "Farmak"  | Alla Mironenko; Andriy Goy; Ihor Kravchuk; Larysa Radchenko; Liudmyla Bolotova; Nataliia Teteriuk                                                                                                                                                                                                                                                                                                                                                                                                                                                            |
| EPI_ISL_582509                                                                                                                                                                                                                                                                                                                                                                                                                                                                                                                                                                                                                                                                                                                                                                                                                                                                                                                                                                                                                                                                                                                                                                                                                                                                                                                                                                                                                                                                                                                                                                                                                                                                                                                                                                                                                                                                                                                                                                                                                                                                                                                                                                                                                                                                                                                                                                                                                                                                                                                                                                                                                                                                                                                                                                                                                                                                                                                                                                                                                                                                                                                                                                                                                                                                                                                                                                                                                                                                                                                                                                                                                                                                                                                                                                                                                                                                                                                                                                                                                                                                                                                                                                                                                                                                                                                                                                                                                                                                                                                                                                                                                                                                                                                                                                                                                                                                                                                                                                                                                                                                                                                                                                                                                                                                                                                                                                                                                                                                                                                                                                                                                                                                                                                                                                                                                                                                                                                                                                                                                                                                                                                                                                                                                                                                                                                                                                                                                                                                                                                                                                                                                                                                                                                                                                                                                                                                                                                                                                                                                                                                                                                                                                                                                                                                                                                                                                                                                                                                                                                                                                                                                                                                                                                                                                                                                                                                                                                                                                                                                                                                                                                                                                                                                                                                                                                                                                                                                                                                                                                                                                                                                                                                                                                                                                                                                                                                                                                                                                                                                                                                                                                                                                                                                                                                                                                                                                                                                                                                                                                                                                                                                                                                                                                                                                                                                                                                                                                                                                                                                                                                                                                                                                                                                                                                                                                                                                                                                                                                                                                                                                                                                                                                                                                                                                                                                                                                                                                                                                                                                                                                                                                                                                                                                                                                                                                                                                                                                                                                                                                                                                                                                                                                                                                                                                                                                                                                                                                                                                                                                                                                                                                                                                                                                                                                                                                                                                                                                                                                                                                                                                                                                                                                                                                                                                                                                                                                                                                                                                                                                                                                                                                                                                                                                                                                                                                                                                                                                 | Department of Respiratory and other Viral Infections of L.V.Gromashevsky Institute of Epidemiology & Infectious Diseases NAMS of Ukraine | Department of Respiratory and other Viral Infections of L.V.Gromashevsky Institute of Epidemiology & Infectious Diseases NAMS of Ukraine, JSC "Farmak" | Alla Mironenko; Andriy Goy; Ihor Kravchuk; Larysa Radchenko; Ludmyla Bolotova; Nataliia Teteriuk                                                                                                                                                                                                                                                                                                                                                                                                                                                             |
| EPI_ISL_582510                                                                                                                                                                                                                                                                                                                                                                                                                                                                                                                                                                                                                                                                                                                                                                                                                                                                                                                                                                                                                                                                                                                                                                                                                                                                                                                                                                                                                                                                                                                                                                                                                                                                                                                                                                                                                                                                                                                                                                                                                                                                                                                                                                                                                                                                                                                                                                                                                                                                                                                                                                                                                                                                                                                                                                                                                                                                                                                                                                                                                                                                                                                                                                                                                                                                                                                                                                                                                                                                                                                                                                                                                                                                                                                                                                                                                                                                                                                                                                                                                                                                                                                                                                                                                                                                                                                                                                                                                                                                                                                                                                                                                                                                                                                                                                                                                                                                                                                                                                                                                                                                                                                                                                                                                                                                                                                                                                                                                                                                                                                                                                                                                                                                                                                                                                                                                                                                                                                                                                                                                                                                                                                                                                                                                                                                                                                                                                                                                                                                                                                                                                                                                                                                                                                                                                                                                                                                                                                                                                                                                                                                                                                                                                                                                                                                                                                                                                                                                                                                                                                                                                                                                                                                                                                                                                                                                                                                                                                                                                                                                                                                                                                                                                                                                                                                                                                                                                                                                                                                                                                                                                                                                                                                                                                                                                                                                                                                                                                                                                                                                                                                                                                                                                                                                                                                                                                                                                                                                                                                                                                                                                                                                                                                                                                                                                                                                                                                                                                                                                                                                                                                                                                                                                                                                                                                                                                                                                                                                                                                                                                                                                                                                                                                                                                                                                                                                                                                                                                                                                                                                                                                                                                                                                                                                                                                                                                                                                                                                                                                                                                                                                                                                                                                                                                                                                                                                                                                                                                                                                                                                                                                                                                                                                                                                                                                                                                                                                                                                                                                                                                                                                                                                                                                                                                                                                                                                                                                                                                                                                                                                                                                                                                                                                                                                                                                                                                                                                                                                 | Department of Respiratory and other Viral Infections of L.V.Gromashevsky Institute of Epidemiology & Infectious Diseases NAMS of Ukraine | Department of Respiratory and other Viral Infections of L.V.Gromashevsky Institute of Epidemiology & Infectious Diseases NAMS of Ukrain, JSC "Farmak"  | Alla Mironenko; Andriy Goy; Ihor Kravchuk; Larysa Radchenko; Ludmyla Bolotova; Nataliia Teteriuk                                                                                                                                                                                                                                                                                                                                                                                                                                                             |
| EPI_ISL_582511 to 582513, EPI_ISL_654819 to 654820                                                                                                                                                                                                                                                                                                                                                                                                                                                                                                                                                                                                                                                                                                                                                                                                                                                                                                                                                                                                                                                                                                                                                                                                                                                                                                                                                                                                                                                                                                                                                                                                                                                                                                                                                                                                                                                                                                                                                                                                                                                                                                                                                                                                                                                                                                                                                                                                                                                                                                                                                                                                                                                                                                                                                                                                                                                                                                                                                                                                                                                                                                                                                                                                                                                                                                                                                                                                                                                                                                                                                                                                                                                                                                                                                                                                                                                                                                                                                                                                                                                                                                                                                                                                                                                                                                                                                                                                                                                                                                                                                                                                                                                                                                                                                                                                                                                                                                                                                                                                                                                                                                                                                                                                                                                                                                                                                                                                                                                                                                                                                                                                                                                                                                                                                                                                                                                                                                                                                                                                                                                                                                                                                                                                                                                                                                                                                                                                                                                                                                                                                                                                                                                                                                                                                                                                                                                                                                                                                                                                                                                                                                                                                                                                                                                                                                                                                                                                                                                                                                                                                                                                                                                                                                                                                                                                                                                                                                                                                                                                                                                                                                                                                                                                                                                                                                                                                                                                                                                                                                                                                                                                                                                                                                                                                                                                                                                                                                                                                                                                                                                                                                                                                                                                                                                                                                                                                                                                                                                                                                                                                                                                                                                                                                                                                                                                                                                                                                                                                                                                                                                                                                                                                                                                                                                                                                                                                                                                                                                                                                                                                                                                                                                                                                                                                                                                                                                                                                                                                                                                                                                                                                                                                                                                                                                                                                                                                                                                                                                                                                                                                                                                                                                                                                                                                                                                                                                                                                                                                                                                                                                                                                                                                                                                                                                                                                                                                                                                                                                                                                                                                                                                                                                                                                                                                                                                                                                                                                                                                                                                                                                                                                                                                                                                                                                                                                                                                                             | Department of Respiratory and other Viral Infections of L.V.Gromashevsky Institute of Epidemiology & Infectious Diseases NAMS of Ukrain  | Department of Respiratory and other Viral Infections of L.V.Gromashevsky Institute of Epidemiology & Infectious Diseases NAMS of Ukrain, JSC "Farmak"  | Alla Mironenko; Andriy Goy; Ihor Kravchuk; Larysa Radchenko; Ludmyla Bolotova; Nataliia Teteriuk                                                                                                                                                                                                                                                                                                                                                                                                                                                             |
| EPI_ISL_654818                                                                                                                                                                                                                                                                                                                                                                                                                                                                                                                                                                                                                                                                                                                                                                                                                                                                                                                                                                                                                                                                                                                                                                                                                                                                                                                                                                                                                                                                                                                                                                                                                                                                                                                                                                                                                                                                                                                                                                                                                                                                                                                                                                                                                                                                                                                                                                                                                                                                                                                                                                                                                                                                                                                                                                                                                                                                                                                                                                                                                                                                                                                                                                                                                                                                                                                                                                                                                                                                                                                                                                                                                                                                                                                                                                                                                                                                                                                                                                                                                                                                                                                                                                                                                                                                                                                                                                                                                                                                                                                                                                                                                                                                                                                                                                                                                                                                                                                                                                                                                                                                                                                                                                                                                                                                                                                                                                                                                                                                                                                                                                                                                                                                                                                                                                                                                                                                                                                                                                                                                                                                                                                                                                                                                                                                                                                                                                                                                                                                                                                                                                                                                                                                                                                                                                                                                                                                                                                                                                                                                                                                                                                                                                                                                                                                                                                                                                                                                                                                                                                                                                                                                                                                                                                                                                                                                                                                                                                                                                                                                                                                                                                                                                                                                                                                                                                                                                                                                                                                                                                                                                                                                                                                                                                                                                                                                                                                                                                                                                                                                                                                                                                                                                                                                                                                                                                                                                                                                                                                                                                                                                                                                                                                                                                                                                                                                                                                                                                                                                                                                                                                                                                                                                                                                                                                                                                                                                                                                                                                                                                                                                                                                                                                                                                                                                                                                                                                                                                                                                                                                                                                                                                                                                                                                                                                                                                                                                                                                                                                                                                                                                                                                                                                                                                                                                                                                                                                                                                                                                                                                                                                                                                                                                                                                                                                                                                                                                                                                                                                                                                                                                                                                                                                                                                                                                                                                                                                                                                                                                                                                                                                                                                                                                                                                                                                                                                                                                                                                 | Department of Respiratory and other Viral Infections of L.V.Gromashevsky Institute of Epidemiology & Infectious Diseases NAMS of Ukrain  | Department of Respiratory and other Viral Infections of L.V.Gromashevsky Institute of Epidemiology & Infectious Diseases NAMS of Ukrain, JSC "Farmak"  | Alla Mironenko; Andriy Goy; Ihor Kravchuk; Larysa Radchenko; Ludmyla Bolotova; Nataliia Teteriuk                                                                                                                                                                                                                                                                                                                                                                                                                                                             |
| EPI_ISL_450198 to 450210                                                                                                                                                                                                                                                                                                                                                                                                                                                                                                                                                                                                                                                                                                                                                                                                                                                                                                                                                                                                                                                                                                                                                                                                                                                                                                                                                                                                                                                                                                                                                                                                                                                                                                                                                                                                                                                                                                                                                                                                                                                                                                                                                                                                                                                                                                                                                                                                                                                                                                                                                                                                                                                                                                                                                                                                                                                                                                                                                                                                                                                                                                                                                                                                                                                                                                                                                                                                                                                                                                                                                                                                                                                                                                                                                                                                                                                                                                                                                                                                                                                                                                                                                                                                                                                                                                                                                                                                                                                                                                                                                                                                                                                                                                                                                                                                                                                                                                                                                                                                                                                                                                                                                                                                                                                                                                                                                                                                                                                                                                                                                                                                                                                                                                                                                                                                                                                                                                                                                                                                                                                                                                                                                                                                                                                                                                                                                                                                                                                                                                                                                                                                                                                                                                                                                                                                                                                                                                                                                                                                                                                                                                                                                                                                                                                                                                                                                                                                                                                                                                                                                                                                                                                                                                                                                                                                                                                                                                                                                                                                                                                                                                                                                                                                                                                                                                                                                                                                                                                                                                                                                                                                                                                                                                                                                                                                                                                                                                                                                                                                                                                                                                                                                                                                                                                                                                                                                                                                                                                                                                                                                                                                                                                                                                                                                                                                                                                                                                                                                                                                                                                                                                                                                                                                                                                                                                                                                                                                                                                                                                                                                                                                                                                                                                                                                                                                                                                                                                                                                                                                                                                                                                                                                                                                                                                                                                                                                                                                                                                                                                                                                                                                                                                                                                                                                                                                                                                                                                                                                                                                                                                                                                                                                                                                                                                                                                                                                                                                                                                                                                                                                                                                                                                                                                                                                                                                                                                                                                                                                                                                                                                                                                                                                                                                                                                                                                                                                                                                       | Department of Virology                                                                                                                   | Department of Virology                                                                                                                                 | Ackermann, N.; Antwerpen, M.; Bengs, K.; Berger, A.; Boehm, S.; Boehmer; Boender; Buchholz, U.; Cai, W.; Corman; D.V.; Dangel, A.; Drosten, C.; Eberle, U.; Fingerle, V.; Grah, A.; Haas, W.; Hamouda, O.; Hoch, M.; Hoernesdörfer, S.; Ippisch, S.; Jones; Katz, K.; Konrad, R.; Liebl, B.; M.M.; Marosevic; Muehleman, B.; Muller, N.; Poertner, K.; Protzer, U.; Reich, A.; Rexroth, U.; Schneider, J.; Sing, A. T.C.; T.S.; Treis, B.; V.M.; Veith, T.; Walter, M.; Wicklein, B.; Woelfel, R.; Woudenberg, T.; Zapf, A.; Zeitmann, N.; an der Heiden, M. |
| EPI_ISL_768526 to 768527, EPI_ISL_804007 to 804008                                                                                                                                                                                                                                                                                                                                                                                                                                                                                                                                                                                                                                                                                                                                                                                                                                                                                                                                                                                                                                                                                                                                                                                                                                                                                                                                                                                                                                                                                                                                                                                                                                                                                                                                                                                                                                                                                                                                                                                                                                                                                                                                                                                                                                                                                                                                                                                                                                                                                                                                                                                                                                                                                                                                                                                                                                                                                                                                                                                                                                                                                                                                                                                                                                                                                                                                                                                                                                                                                                                                                                                                                                                                                                                                                                                                                                                                                                                                                                                                                                                                                                                                                                                                                                                                                                                                                                                                                                                                                                                                                                                                                                                                                                                                                                                                                                                                                                                                                                                                                                                                                                                                                                                                                                                                                                                                                                                                                                                                                                                                                                                                                                                                                                                                                                                                                                                                                                                                                                                                                                                                                                                                                                                                                                                                                                                                                                                                                                                                                                                                                                                                                                                                                                                                                                                                                                                                                                                                                                                                                                                                                                                                                                                                                                                                                                                                                                                                                                                                                                                                                                                                                                                                                                                                                                                                                                                                                                                                                                                                                                                                                                                                                                                                                                                                                                                                                                                                                                                                                                                                                                                                                                                                                                                                                                                                                                                                                                                                                                                                                                                                                                                                                                                                                                                                                                                                                                                                                                                                                                                                                                                                                                                                                                                                                                                                                                                                                                                                                                                                                                                                                                                                                                                                                                                                                                                                                                                                                                                                                                                                                                                                                                                                                                                                                                                                                                                                                                                                                                                                                                                                                                                                                                                                                                                                                                                                                                                                                                                                                                                                                                                                                                                                                                                                                                                                                                                                                                                                                                                                                                                                                                                                                                                                                                                                                                                                                                                                                                                                                                                                                                                                                                                                                                                                                                                                                                                                                                                                                                                                                                                                                                                                                                                                                                                                                                                                                                             | Department of Virology I, National Institute of Infectious Diseases                                                                      | Pathogen Genomics Center, National Institute of Infectious Diseases                                                                                    | Kentaro Itokawa; Makoto Kuroda; Masanori Hashino; Rina Tanaka; Shuetsu Fukushima; Souichi Yamada; Tsuyoshi Sekizuka                                                                                                                                                                                                                                                                                                                                                                                                                                          |
| EPI_ISL_529135                                                                                                                                                                                                                                                                                                                                                                                                                                                                                                                                                                                                                                                                                                                                                                                                                                                                                                                                                                                                                                                                                                                                                                                                                                                                                                                                                                                                                                                                                                                                                                                                                                                                                                                                                                                                                                                                                                                                                                                                                                                                                                                                                                                                                                                                                                                                                                                                                                                                                                                                                                                                                                                                                                                                                                                                                                                                                                                                                                                                                                                                                                                                                                                                                                                                                                                                                                                                                                                                                                                                                                                                                                                                                                                                                                                                                                                                                                                                                                                                                                                                                                                                                                                                                                                                                                                                                                                                                                                                                                                                                                                                                                                                                                                                                                                                                                                                                                                                                                                                                                                                                                                                                                                                                                                                                                                                                                                                                                                                                                                                                                                                                                                                                                                                                                                                                                                                                                                                                                                                                                                                                                                                                                                                                                                                                                                                                                                                                                                                                                                                                                                                                                                                                                                                                                                                                                                                                                                                                                                                                                                                                                                                                                                                                                                                                                                                                                                                                                                                                                                                                                                                                                                                                                                                                                                                                                                                                                                                                                                                                                                                                                                                                                                                                                                                                                                                                                                                                                                                                                                                                                                                                                                                                                                                                                                                                                                                                                                                                                                                                                                                                                                                                                                                                                                                                                                                                                                                                                                                                                                                                                                                                                                                                                                                                                                                                                                                                                                                                                                                                                                                                                                                                                                                                                                                                                                                                                                                                                                                                                                                                                                                                                                                                                                                                                                                                                                                                                                                                                                                                                                                                                                                                                                                                                                                                                                                                                                                                                                                                                                                                                                                                                                                                                                                                                                                                                                                                                                                                                                                                                                                                                                                                                                                                                                                                                                                                                                                                                                                                                                                                                                                                                                                                                                                                                                                                                                                                                                                                                                                                                                                                                                                                                                                                                                                                                                                                                                                                 | Department of Virology III, National Institute of Infectious Diseases                                                                    | Pathogen Genomics Center, National Institute of Infectious Diseases                                                                                    | Kentaro Itokawa; Makoto Kuroda; Makoto Takeda; Masanori Hashino; Rina Tanaka; Shutoku Matsuyama; Takaji Wakita; Tsuyoshi Sekizuka                                                                                                                                                                                                                                                                                                                                                                                                                            |
| EPI_ISL_413602 to 413605, EPI_ISL_414640 to 414643, EPI_ISL_414645, EPI_ISL_418385 to 418406, EPI_ISL_418408 to 418411, EPI_ISL_481513 to 481715, EPI_ISL_481717 to 481740, EPI_ISL_732565 to 732598, EPI_ISL_732600 to 732631, EPI_ISL_732633 to 732640, EPI_ISL_732642 to 732644, EPI_ISL_732646 to 732653, EPI_ISL_737034 to 737080, EPI_ISL_737209 to 737235, EPI_ISL_738134 to 738135, EPI_ISL_755943 to 756125, EPI_ISL_756165 to 756183, EPI_ISL_756247 to 756252, EPI_ISL_756282 to 756292, EPI_ISL_757288 to 757394, EPI_ISL_759763 to 759841, EPI_ISL_759899 to 759954, EPI_ISL_766016 to 766027, EPI_ISL_833201 to 833205, EPI_ISL_833207, EPI_ISL_833210 to 833212, EPI_ISL_833214 to 833219, EPI_ISL_833227, EPI_ISL_862052 to 862074, EPI_ISL_862082 to 862120                                                                                                                                                                                                                                                                                                                                                                                                                                                                                                                                                                                                                                                                                                                                                                                                                                                                                                                                                                                                                                                                                                                                                                                                                                                                                                                                                                                                                                                                                                                                                                                                                                                                                                                                                                                                                                                                                                                                                                                                                                                                                                                                                                                                                                                                                                                                                                                                                                                                                                                                                                                                                                                                                                                                                                                                                                                                                                                                                                                                                                                                                                                                                                                                                                                                                                                                                                                                                                                                                                                                                                                                                                                                                                                                                                                                                                                                                                                                                                                                                                                                                                                                                                                                                                                                                                                                                                                                                                                                                                                                                                                                                                                                                                                                                                                                                                                                                                                                                                                                                                                                                                                                                                                                                                                                                                                                                                                                                                                                                                                                                                                                                                                                                                                                                                                                                                                                                                                                                                                                                                                                                                                                                                                                                                                                                                                                                                                                                                                                                                                                                                                                                                                                                                                                                                                                                                                                                                                                                                                                                                                                                                                                                                                                                                                                                                                                                                                                                                                                                                                                                                                                                                                                                                                                                                                                                                                                                                                                                                                                                                                                                                                                                                                                                                                                                                                                                                                                                                                                                                                                                                                                                                                                                                                                                                                                                                                                                                                                                                                                                                                                                                                                                                                                                                                                                                                                                                                                                                                                                                                                                                                                                                                                                                                                                                                                                                                                                                                                                                                                                                                                                                                                                                                                                                                                                                                                                                                                                                                                                                                                                                                                                                                                                                                                                                                                                                                                                                                                                                                                                                                                                                                                                                                                                                                                                                                                                                                                                                                                                                                                                                                                                                                                                                                                                                                                                                                                                                                                                                                                                                                                                                                                                                                                                                                                                                                                                                                                                                                                                                                                                                                                                                                   |                                                                                                                                          |                                                                                                                                                        |                                                                                                                                                                                                                                                                                                                                                                                                                                                                                                                                                              |
| see above                                                                                                                                                                                                                                                                                                                                                                                                                                                                                                                                                                                                                                                                                                                                                                                                                                                                                                                                                                                                                                                                                                                                                                                                                                                                                                                                                                                                                                                                                                                                                                                                                                                                                                                                                                                                                                                                                                                                                                                                                                                                                                                                                                                                                                                                                                                                                                                                                                                                                                                                                                                                                                                                                                                                                                                                                                                                                                                                                                                                                                                                                                                                                                                                                                                                                                                                                                                                                                                                                                                                                                                                                                                                                                                                                                                                                                                                                                                                                                                                                                                                                                                                                                                                                                                                                                                                                                                                                                                                                                                                                                                                                                                                                                                                                                                                                                                                                                                                                                                                                                                                                                                                                                                                                                                                                                                                                                                                                                                                                                                                                                                                                                                                                                                                                                                                                                                                                                                                                                                                                                                                                                                                                                                                                                                                                                                                                                                                                                                                                                                                                                                                                                                                                                                                                                                                                                                                                                                                                                                                                                                                                                                                                                                                                                                                                                                                                                                                                                                                                                                                                                                                                                                                                                                                                                                                                                                                                                                                                                                                                                                                                                                                                                                                                                                                                                                                                                                                                                                                                                                                                                                                                                                                                                                                                                                                                                                                                                                                                                                                                                                                                                                                                                                                                                                                                                                                                                                                                                                                                                                                                                                                                                                                                                                                                                                                                                                                                                                                                                                                                                                                                                                                                                                                                                                                                                                                                                                                                                                                                                                                                                                                                                                                                                                                                                                                                                                                                                                                                                                                                                                                                                                                                                                                                                                                                                                                                                                                                                                                                                                                                                                                                                                                                                                                                                                                                                                                                                                                                                                                                                                                                                                                                                                                                                                                                                                                                                                                                                                                                                                                                                                                                                                                                                                                                                                                                                                                                                                                                                                                                                                                                                                                                                                                                                                                                                                                                                                                                      | Department of Virology and Immunology, University of Helsinki and Helsinki University Hospital, HUSLAB Finland                           | Department of Virology, Faculty of Medicine, University of Helsinki, Helsinki, Finland                                                                 | Essi Korhonen; Fathiah Zakham; Hanna Liimatainen; Hannimari Kallio-Kokko; Harri Kangas; Hussein Alburkat; Jenni Virtanen; Maija Lappalainen; Maija Suvanto; Olli Valpalahiti; Pekka Ellonen; Phuoc Truong; Ravi Kant; Sari Hannula; Satu Kunkela; Teemu Smura                                                                                                                                                                                                                                                                                                |
| EPI_ISL_515974                                                                                                                                                                                                                                                                                                                                                                                                                                                                                                                                                                                                                                                                                                                                                                                                                                                                                                                                                                                                                                                                                                                                                                                                                                                                                                                                                                                                                                                                                                                                                                                                                                                                                                                                                                                                                                                                                                                                                                                                                                                                                                                                                                                                                                                                                                                                                                                                                                                                                                                                                                                                                                                                                                                                                                                                                                                                                                                                                                                                                                                                                                                                                                                                                                                                                                                                                                                                                                                                                                                                                                                                                                                                                                                                                                                                                                                                                                                                                                                                                                                                                                                                                                                                                                                                                                                                                                                                                                                                                                                                                                                                                                                                                                                                                                                                                                                                                                                                                                                                                                                                                                                                                                                                                                                                                                                                                                                                                                                                                                                                                                                                                                                                                                                                                                                                                                                                                                                                                                                                                                                                                                                                                                                                                                                                                                                                                                                                                                                                                                                                                                                                                                                                                                                                                                                                                                                                                                                                                                                                                                                                                                                                                                                                                                                                                                                                                                                                                                                                                                                                                                                                                                                                                                                                                                                                                                                                                                                                                                                                                                                                                                                                                                                                                                                                                                                                                                                                                                                                                                                                                                                                                                                                                                                                                                                                                                                                                                                                                                                                                                                                                                                                                                                                                                                                                                                                                                                                                                                                                                                                                                                                                                                                                                                                                                                                                                                                                                                                                                                                                                                                                                                                                                                                                                                                                                                                                                                                                                                                                                                                                                                                                                                                                                                                                                                                                                                                                                                                                                                                                                                                                                                                                                                                                                                                                                                                                                                                                                                                                                                                                                                                                                                                                                                                                                                                                                                                                                                                                                                                                                                                                                                                                                                                                                                                                                                                                                                                                                                                                                                                                                                                                                                                                                                                                                                                                                                                                                                                                                                                                                                                                                                                                                                                                                                                                                                                                                                                                 | Department of Virus and Microbiological Special Diagnostics, Statens Serum Institut                                                      | Albertsen lab, Department of Chemistry and Bioscience, Aalborg University, Denmark                                                                     | Danish Corona Danica Consortia                                                                                                                                                                                                                                                                                                                                                                                                                                                                                                                               |
| EPI_ISL_856612 to 856614, EPI_ISL_856617, EPI_ISL_856620 to 856644, EPI_ISL_856646 to 856651, EPI_ISL_856653 to 856672, EPI_ISL_856675 to 856676                                                                                                                                                                                                                                                                                                                                                                                                                                                                                                                                                                                                                                                                                                                                                                                                                                                                                                                                                                                                                                                                                                                                                                                                                                                                                                                                                                                                                                                                                                                                                                                                                                                                                                                                                                                                                                                                                                                                                                                                                                                                                                                                                                                                                                                                                                                                                                                                                                                                                                                                                                                                                                                                                                                                                                                                                                                                                                                                                                                                                                                                                                                                                                                                                                                                                                                                                                                                                                                                                                                                                                                                                                                                                                                                                                                                                                                                                                                                                                                                                                                                                                                                                                                                                                                                                                                                                                                                                                                                                                                                                                                                                                                                                                                                                                                                                                                                                                                                                                                                                                                                                                                                                                                                                                                                                                                                                                                                                                                                                                                                                                                                                                                                                                                                                                                                                                                                                                                                                                                                                                                                                                                                                                                                                                                                                                                                                                                                                                                                                                                                                                                                                                                                                                                                                                                                                                                                                                                                                                                                                                                                                                                                                                                                                                                                                                                                                                                                                                                                                                                                                                                                                                                                                                                                                                                                                                                                                                                                                                                                                                                                                                                                                                                                                                                                                                                                                                                                                                                                                                                                                                                                                                                                                                                                                                                                                                                                                                                                                                                                                                                                                                                                                                                                                                                                                                                                                                                                                                                                                                                                                                                                                                                                                                                                                                                                                                                                                                                                                                                                                                                                                                                                                                                                                                                                                                                                                                                                                                                                                                                                                                                                                                                                                                                                                                                                                                                                                                                                                                                                                                                                                                                                                                                                                                                                                                                                                                                                                                                                                                                                                                                                                                                                                                                                                                                                                                                                                                                                                                                                                                                                                                                                                                                                                                                                                                                                                                                                                                                                                                                                                                                                                                                                                                                                                                                                                                                                                                                                                                                                                                                                                                                                                                                                                                                                               | Department of Virus and Microbiological Special Diagnostics, Statens Serum Institut, Copenhagen, Denmark                                 | Aalborg University                                                                                                                                     | Danish Covid-19 Genome Consortium                                                                                                                                                                                                                                                                                                                                                                                                                                                                                                                            |
| EPI_ISL_668458 to 668464, EPI_ISL_668467 to 668502, EPI_ISL_668504 to 668509, EPI_ISL_668511 to 668513, EPI_ISL_668516 to 668517, EPI_ISL_668519 to 668522, EPI_ISL_668524 to 668543, EPI_ISL_668546 to 668556, EPI_ISL_668558 to 668596, EPI_ISL_668598 to 668608, EPI_ISL_668613, EPI_ISL_668615 to 668616, EPI_ISL_668618, EPI_ISL_668620 to 668621, EPI_ISL_668623, EPI_ISL_668627 to 668631, EPI_ISL_668633 to 668658, EPI_ISL_668660 to 668680, EPI_ISL_668682 to 668686, EPI_ISL_668688 to 668700, EPI_ISL_668702 to 668721, EPI_ISL_668723 to 668750, EPI_ISL_668752 to 668758, EPI_ISL_668760, EPI_ISL_668762 to 668769, EPI_ISL_668791 to 668830, EPI_ISL_668832 to 668837, EPI_ISL_668839 to 668853, EPI_ISL_668855, EPI_ISL_668858 to 668861, EPI_ISL_668863 to 668877, EPI_ISL_668879 to 668878, EPI_ISL_668880 to 668885, EPI_ISL_668887, EPI_ISL_668890 to 668893, EPI_ISL_668896 to 668899, EPI_ISL_668900, EPI_ISL_668903 to 668905, EPI_ISL_668907 to 668916, EPI_ISL_668918, EPI_ISL_668923 to 668925, EPI_ISL_668927 to 668928, EPI_ISL_668930 to 668933, EPI_ISL_668935 to 668937, EPI_ISL_668940, EPI_ISL_668943 to 668944, EPI_ISL_668946 to 668952, EPI_ISL_668954, EPI_ISL_668956 to 668959, EPI_ISL_668961 to 668966, EPI_ISL_668968 to 668970, EPI_ISL_668972 to 668977, EPI_ISL_668979, EPI_ISL_668981 to 668995, EPI_ISL_668997 to 668999, EPI_ISL_669001 to 669005, EPI_ISL_669008 to 669018, EPI_ISL_669020 to 669023, EPI_ISL_669025 to 669033, EPI_ISL_669035, EPI_ISL_669037 to 669039, EPI_ISL_669041 to 669049, EPI_ISL_669051 to 669054, EPI_ISL_669057 to 669063, EPI_ISL_669066 to 669074, EPI_ISL_669076 to 669081, EPI_ISL_669083 to 669093, EPI_ISL_669095 to 669100, EPI_ISL_669102 to 669106, EPI_ISL_669109, EPI_ISL_669111 to 669115, EPI_ISL_669117 to 669120, EPI_ISL_669122 to 669130, EPI_ISL_669132 to 669141, EPI_ISL_669143 to 669145, EPI_ISL_669147 to 669153, EPI_ISL_669155 to 669158, EPI_ISL_669160 to 669165, EPI_ISL_669167 to 669169, EPI_ISL_669171 to 669175, EPI_ISL_669177 to 669180, EPI_ISL_669182 to 669188, EPI_ISL_669190 to 669191, EPI_ISL_669193 to 669213, EPI_ISL_669215, EPI_ISL_669217, EPI_ISL_669219 to 669220, EPI_ISL_669222 to 669226, EPI_ISL_669228 to 669234, EPI_ISL_669237 to 669255, EPI_ISL_669257 to 669259, EPI_ISL_669261 to 669265, EPI_ISL_669267, EPI_ISL_669269 to 669272, EPI_ISL_669275, EPI_ISL_669277 to 669283, EPI_ISL_669285 to 669294, EPI_ISL_669296 to 669297, EPI_ISL_669299 to 669323, EPI_ISL_669325 to 669326, EPI_ISL_669328 to 669329, EPI_ISL_669331, EPI_ISL_669333 to 669337, EPI_ISL_669339, EPI_ISL_669342 to 669357, EPI_ISL_669359 to 669360, EPI_ISL_669363 to 669379, EPI_ISL_669381 to 669401, EPI_ISL_669403 to 669404, EPI_ISL_669406 to 669407, EPI_ISL_669409 to 669420, EPI_ISL_669423 to 669428, EPI_ISL_669430 to 669433, EPI_ISL_669435 to 669439, EPI_ISL_669441 to 669449, EPI_ISL_669452 to 669453, EPI_ISL_669455, EPI_ISL_669458, EPI_ISL_669460 to 669478, EPI_ISL_669480 to 669498, EPI_ISL_669500, EPI_ISL_669502, EPI_ISL_669504 to 669507, EPI_ISL_669510 to 669512, EPI_ISL_669515 to 669539, EPI_ISL_669541 to 669542, EPI_ISL_669544 to 669545, EPI_ISL_669547 to 669548, EPI_ISL_669550, EPI_ISL_669593, EPI_ISL_669596, EPI_ISL_669599 to 669638, EPI_ISL_669641 to 669648, EPI_ISL_669650 to 669652, EPI_ISL_669654 to 669658, EPI_ISL_669660 to 669668, EPI_ISL_669670 to 669678, EPI_ISL_669680 to 669688, EPI_ISL_669690 to 669693, EPI_ISL_669695 to 669699, EPI_ISL_669700 to 669702, EPI_ISL_669704 to 669706, EPI_ISL_669708 to 669710, EPI_ISL_669712 to 669713, EPI_ISL_669715 to 669716, EPI_ISL_669718 to 669719, EPI_ISL_669720 to 669721, EPI_ISL_669723 to 669724, EPI_ISL_669726 to 669727, EPI_ISL_669729 to 669731, EPI_ISL_669733 to 669734, EPI_ISL_669736 to 669737, EPI_ISL_669739 to 669740, EPI_ISL_669742 to 669743, EPI_ISL_669745 to 669746, EPI_ISL_669748 to 669749, EPI_ISL_669751 to 669752, EPI_ISL_669754 to 669755, EPI_ISL_669757 to 669758, EPI_ISL_669760 to 669761, EPI_ISL_669763 to 669764, EPI_ISL_669766 to 669767, EPI_ISL_669769 to 669770, EPI_ISL_669772 to 669773, EPI_ISL_669775 to 669776, EPI_ISL_669778 to 669779, EPI_ISL_669781 to 669782, EPI_ISL_669784 to 669785, EPI_ISL_669787 to 669788, EPI_ISL_669790 to 669791, EPI_ISL_669793 to 669794, EPI_ISL_669796 to 669797, EPI_ISL_669799 to 669800, EPI_ISL_669802 to 669803, EPI_ISL_669805 to 669806, EPI_ISL_669808 to 669809, EPI_ISL_669810 to 669811, EPI_ISL_669813 to 669814, EPI_ISL_669816 to 669817, EPI_ISL_669819 to 669820, EPI_ISL_669822 to 669823, EPI_ISL_669825 to 669826, EPI_ISL_669828 to 669829, EPI_ISL_669831 to 669832, EPI_ISL_669834 to 669835, EPI_ISL_669837 to 669838, EPI_ISL_669840 to 669841, EPI_ISL_669843 to 669844, EPI_ISL_669846 to 669847, EPI_ISL_669849 to 669850, EPI_ISL_669852 to 669853, EPI_ISL_669855 to 669856, EPI_ISL_669858 to 669859, EPI_ISL_669861 to 669862, EPI_ISL_669864 to 669865, EPI_ISL_669867 to 669868, EPI_ISL_669870 to 669871, EPI_ISL_669873 to 669874, EPI_ISL_669876 to 669877, EPI_ISL_669879 to 669880, EPI_ISL_669882 to 669883, EPI_ISL_669885 to 669886, EPI_ISL_669888 to 669889, EPI_ISL_669891 to 669892, EPI_ISL_669894 to 669895, EPI_ISL_669897 to 669898, EPI_ISL_669900 to 669901, EPI_ISL_669903 to 669904, EPI_ISL_669906 to 669907, EPI_ISL_669909 to 669910, EPI_ISL_669913 to 669916, EPI_ISL_669918 to 669919, EPI_ISL_669921 to 669922, EPI_ISL_669924 to 669925, EPI_ISL_669927 to 669928, EPI_ISL_669930 to 669931, EPI_ISL_669933 to 669934, EPI_ISL_669936 to 669937, EPI_ISL_669939 to 669940, EPI_ISL_669942 to 669943, EPI_ISL_669945 to 669946, EPI_ISL_669948 to 669949, EPI_ISL_669951 to 669952, EPI_ISL_669954 to 669955, EPI_ISL_669957 to 669958, EPI_ISL_669960 to 669961, EPI_ISL_669963 to 669964, EPI_ISL_669966 to 669967, EPI_ISL_669969 to 669970, EPI_ISL_669972 to 669973, EPI_ISL_669975 to 669976, EPI_ISL_669978 to 669979, EPI_ISL_669981 to 669982, EPI_ISL_669984 to 669985, EPI_ISL_669987 to 669988, EPI_ISL_669990 to 669991, EPI_ISL_669993 to 669994, EPI_ISL_669996 to 669997, EPI_ISL_669999 to 670000, EPI_ISL_670002 to 670003, EPI_ISL_670005 to 670006, EPI_ISL_670008 to 670009, EPI_ISL_670011 to 670012, EPI_ISL_670014 to 670015, EPI_ISL_670017 to 670018, EPI_ISL_670020 to 670021, EPI_ISL_670023 to 670024, EPI_ISL_670026 to 670027, EPI_ISL_670029 to 670030, EPI_ISL_670032 to 670033, EPI_ISL_670035 to 670036, EPI_ISL_670038 to 670039, EPI_ISL_670041 to 670042, EPI_ISL_670044 to 670045, EPI_ISL_670047 to 670048, EPI_ISL_670050 to 670051, EPI_ISL_670053 to 670054, EPI_ISL_670056 to 670057, EPI_ISL_670059 to 670060, EPI_ISL_670062 to 670063, EPI_ISL_670065 to 670066, EPI_ISL_670068 to 670069, EPI_ISL_670071 to 670072, EPI_ISL_670074 to 670075, EPI_ISL_670077 to 670078, EPI_ISL_670080 to 670081, EPI_ISL_670083 to 670084, EPI_ISL_670086 to 670087, EPI_ISL_670089 to 670090, EPI_ISL_670092 to 670093, EPI_ISL_670095 to 670096, EPI_ISL_670098 to 670099, EPI_ISL_670101 to 670102, EPI_ISL_670104 to 670105, EPI_ISL_670107 to 670108, EPI_ISL_670110 to 670111, EPI_ISL_670113 to 670114, EPI_ISL_670116 to 670117, EPI_ISL_670119 to 670120, EPI_ISL_670122 to 670123, EPI_ISL_670125 to 670126, EPI_ISL_670128 to 670129, EPI_ISL_670131 to 670132, EPI_ISL_670134 to 670135, EPI_ISL_670137 to 670138, EPI_ISL_670140 to 670141, EPI_ISL_670143 to 670144, EPI_ISL_670146 to 670147, EPI_ISL_670149 to 670150, EPI_ISL_670152 to 670153, EPI_ISL_670155 to 670156, EPI_ISL_670158 to 670159, EPI_ISL_670161 to 670162, EPI_ISL_670164 to 670165, EPI_ISL_670167 to 670168, EPI_ISL_670170 to 670171, EPI_ISL_670173 to 670174, EPI_ISL_670176 to 670177, EPI_ISL_670179 to 670180, EPI_ISL_670182 to 670183, EPI_ISL_670185 to 670186, EPI_ISL_670188 to 670189, EPI_ISL_670191 to 670192, EPI_ISL_670194 to 670195, EPI_ISL_670197 to 670198, EPI_ISL_670200 to 670201, EPI_ISL_670203 to 670204, EPI_ISL_670206 to 670207, EPI_ISL_670209 to 670210, EPI_ISL_670212 to 670213, EPI_ISL_670215 to 670216, EPI_ISL_670218 to 670219, EPI_ISL_670220 to 670221, EPI_ISL_670223 to 670224, EPI_ISL_670226 to 670227, EPI_ISL_670229 to 670230, EPI_ISL_670232 to 670233, EPI_ISL_670235 to 670236, EPI_ISL_670238 to 670239, EPI_ISL_670241 to 670242, EPI_ISL_670244 to 670245, EPI_ISL_670247 to 670248, EPI_ISL_670250 to 670251, EPI_ISL_670253 to 670254, EPI_ISL_670256 to 670257, EPI_ISL_670259 to 670260, EPI_ISL_670262 to 670263, EPI_ISL_670265 to 670266, EPI_ISL_670268 to 670269, EPI_ISL_670271 to 670272, EPI_ISL_670274 to 670275, EPI_ISL_670277 to 670278, EPI_ISL_670280 to 670281, EPI_ISL_670283 to 670284, EPI_ISL_670286 to 670287, EPI_ISL_670289 to 670290, EPI_ISL_670292 to 670293, EPI_ISL_670295 to 670296, EPI_ISL_670298 to 670299, EPI_ISL_670301 to 670302, EPI_ISL_670304 to 670305, EPI_ISL_670307 to 670308, EPI_ISL_670310 to 670311, EPI_ISL_670313 to 670314, EPI_ISL_670316 to 670317, EPI_ISL_670319 to 670320, EPI_ISL_670322 to 670323, EPI_ISL_670325 to 670326, EPI_ISL_670328 to 670329, EPI_ISL_670331 to 670332, EPI_ISL_670334 to 670335, EPI_ISL_670337 to 670338, EPI_ISL_670340 to 670341, EPI_ISL_670343 to 670344, EPI_ISL_670346 to 670347, EPI_ISL_670349 to 670350, EPI_ISL_670352 to 670353, EPI_ISL_670355 to 670356, EPI_ISL_670358 to 670359, EPI_ISL_670361 to 670362, EPI_ISL_670364 to 670365, EPI_ISL_670367 to 670368, EPI_ISL_670370 to 670371, EPI_ISL_670373 to 670374, EPI_ISL_670376 to 670377, EPI_ISL_670379 to 670380, EPI_ISL_670382 to 670383, EPI_ISL_670385 to 670386, EPI_ISL_670388 to 670389, EPI_ISL_670391 to 670392, EPI_ISL_670394 to 670395, EPI_ISL_670397 to 670398, EPI_ISL_670400 to 670401, EPI_ISL_670403 to 670404, EPI_ISL_670406 to 670407, EPI_ISL_670409 to 670410, EPI_ISL_670412 to 670413, EPI_ISL_670415 to 670416, EPI_ISL_670418 to 670419, EPI_ISL_670421 to 670422, EPI_ISL_670424 to 670425, EPI_ISL_670427 to 670428, EPI_ISL_670430 to 670431, EPI_ISL_670433 to 670434, EPI_ISL_670436 to 670437, EPI_ISL_670439 to 670440, EPI_ISL_670442 to 670443, EPI_ISL_670445 to 670446, EPI_ISL_670448 to 670449, EPI_ISL_670451 to 670452, EPI_ISL_670454 to 670455, EPI_ISL_670457 to 670458, EPI_ISL_670460 to 670461, EPI_ISL_670463 to 670464, EPI_ISL_670466 to 670467, EPI_ISL_670469 to 670470, EPI_ISL_670472 to 670473, EPI_ISL_670475 to 670476, EPI_ISL_670478 to 670479, EPI_ISL_670481 to 670482, EPI_ISL_670484 to 670485, EPI_ISL_670487 to 670488, EPI_ISL_670490 to 670491, EPI_ISL_670493 to 670494, EPI_ISL_670496 to 670497, EPI_ISL_670499 to 670500, EPI_ISL_670502 to 670503, EPI_ISL_670505 to 670506, EPI_ISL_670508 to 670509, EPI_ISL_670511 to 670512, EPI_ISL_670514 to 670515, EPI_ISL_670517 to 670518, EPI_ISL_670520 to 670521, EPI_ISL_670523 to 670524, EPI_ISL_670526 to 670527, EPI_ISL_670529 to 670530, EPI_ISL_670532 to 670533, EPI_ISL_670535 to 670536, EPI_ISL_670538 to 670539, EPI_ISL_670541 to 670542, EPI_ISL_670544 to 670545, EPI_ISL_670547 to 670548, EPI_ISL_670550 to 670551, EPI_ISL_670553 to 670554, EPI_ISL_670556 to 670557, EPI_ISL_670559 to 670560, EPI_ISL_670562 to 670563, EPI_ISL_670565 to 670566, EPI_ISL_670568 to 670569, EPI_ISL_670571 to 670572, EPI_ISL_670574 to 670575, EPI_ISL_670577 to 670578, EPI_ISL_670580 to 670581, EPI_ISL_670583 to 670584, EPI_ISL_670586 to 670587, EPI_ISL_670589 to 670590, EPI_ISL_670592 to 670593, EPI_ISL_670595 to 670596, EPI_ISL_670598 to 670599, EPI_ISL_670601 to 670602, EPI_ISL_670604 to 670605, EPI_ISL_670607 to 670608, EPI_ISL_670610 to 670611, EPI_ISL_670613 to 670614, EPI_ISL_670616 to 670617, EPI_ISL_670619 to 670620, EPI_ISL_670622 to 670623, EPI_ISL_670625 to 670626, EPI_ISL_670628 to 670629, EPI_ISL_670631 to 670632, EPI_ISL_670634 to 670635, EPI_ISL_670637 to 670638, EPI_ISL_670640 to 670641, EPI_ISL_670643 to 670644, EPI_ISL_670646 to 670647, EPI_ISL_670649 to 670650, EPI_ISL_670652 to 670653, EPI_ISL_670655 to 670656, EPI_ISL_670658 to 670659, EPI_ISL_670661 to 670662, EPI_ISL_670664 to 670665, EPI_ISL_670668 to 670669, EPI_ISL_670671 to 670672, EPI_ISL_670674 to 670675, EPI_ISL_670677 to 670678, EPI_ISL_670680 to 670681, EPI_ISL_670683 to 670684, EPI_ISL_670686 to 670687, EPI_ISL_670689 to 670690, EPI_ISL_670692 to 670693, EPI_ISL_670695 to 670696, EPI_ISL_670698 to 670699, EPI_ISL_670701 to 670702, EPI_ISL_670704 to 670705, EPI_ISL_670707 to 670708, EPI_ISL_670710 to 670711, EPI_ISL_670713 to 670714, EPI_ISL_670716 to 670717, EPI_ISL_670719 to 670720, EPI_ISL_670722 to 670723, EPI_ISL_670725 to 670726, EPI_ISL_670728 to 670729, EPI_ISL_670731 to 670732, EPI_ISL_670734 to 670735, EPI_ISL_670737 to 670738, EPI_ISL_670740 to 670741, EPI_ISL_670743 to 670744, EPI_ISL_670746 to 670747, EPI_ISL_670749 to 670750, EPI_ISL_670752 to 670753, EPI_ISL_670755 to 670756, EPI_ISL_670758 to 670759, EPI_ISL_670761 to 670762, EPI_ISL_670764 to 670765, EPI_ISL_670767 to 670768, EPI_ISL_670770 to 670771, EPI_ISL_670773 to 670774, EPI_ISL_670776 to 670777, EPI_ISL_670779 to 670780, EPI_ISL_670782 to 670783, EPI_ISL_670785 to 670786, EPI_ISL_670788 to 670789, EPI_ISL_670791 to 670792, EPI_ISL_670794 to 670795, EPI_ISL_670797 to 670798, EPI_ISL_670800 to 670801 |                                                                                                                                          |                                                                                                                                                        |                                                                                                                                                                                                                                                                                                                                                                                                                                                                                                                                                              |

EPI\_ISL\_4293330 to 4293337, EPI\_ISL\_4293339 to 4293346, EPI\_ISL\_4293348, EPI\_ISL\_4293350 to 4293358, EPI\_ISL\_4293360 to 4293362, EPI\_ISL\_4293364 to 4293379, EPI\_ISL\_4293381 to 4293399, EPI\_ISL\_4294001 to 4294249, EPI\_ISL\_429431 to 429454, EPI\_ISL\_429456, EPI\_ISL\_429458, EPI\_ISL\_429460 to 429466, EPI\_ISL\_429468 to 429469, EPI\_ISL\_429471 to 429474, EPI\_ISL\_429476 to 429486, EPI\_ISL\_429488 to 429499, EPI\_ISL\_429501 to 429503, EPI\_ISL\_429505 to 429521, EPI\_ISL\_429524 to 429530, EPI\_ISL\_429533 to 429575, EPI\_ISL\_429577 to 429590, EPI\_ISL\_436962 to 436978, EPI\_ISL\_436980 to 436985, EPI\_ISL\_436987 to 436991, EPI\_ISL\_436993, EPI\_ISL\_436995 to 437004, EPI\_ISL\_437006 to 437009, EPI\_ISL\_437011 to 437042, EPI\_ISL\_437627 to 437640, EPI\_ISL\_437642, EPI\_ISL\_437644 to 437647, EPI\_ISL\_437650, EPI\_ISL\_437652 to 437663, EPI\_ISL\_437665 to 437672, EPI\_ISL\_437674, EPI\_ISL\_437676 to 437679, EPI\_ISL\_437681 to 437683, EPI\_ISL\_444817 to 444829, EPI\_ISL\_444831 to 444841, EPI\_ISL\_444843 to 444850, EPI\_ISL\_444852 to 444864, EPI\_ISL\_444866 to 444867, EPI\_ISL\_444869 to 444870, EPI\_ISL\_444872 to 444880, EPI\_ISL\_444883 to 444888, EPI\_ISL\_444890 to 444906, EPI\_ISL\_444908 to 444913, EPI\_ISL\_444915 to 444935, EPI\_ISL\_444937 to 444942, EPI\_ISL\_444944 to 444950, EPI\_ISL\_444952, EPI\_ISL\_444954 to 444955, EPI\_ISL\_444957 to 444961, EPI\_ISL\_444963, EPI\_ISL\_444965 to 444968, EPI\_ISL\_452101 to 452102

EPI\_ISL 613541 to 613543, EPI\_ISL 614403, EPI\_ISL 614406 to 614408, EPI\_ISL 614410 to 614416, EPI\_ISL 614418 to 614420, EPI\_ISL 614422 to 614453, EPI\_ISL 614455 to 614479, EPI\_ISL 614481 to 614487, EPI\_ISL 614489 to 614517, EPI\_ISL 614519 to 614520, EPI\_ISL 614522 to 614526, EPI\_ISL 614528 to 614534, EPI\_ISL 614536 to 614549, EPI\_ISL 614551 to 614567, EPI\_ISL 614569 to 614573, EPI\_ISL 614575 to 614636, EPI\_ISL 614638 to 614645, EPI\_ISL 614647 to 614654, EPI\_ISL 614656 to 614661, EPI\_ISL 614663 to 614725, EPI\_ISL 614727 to 614751, EPI\_ISL 614753 to 614759, EPI\_ISL 614761 to 614762, EPI\_ISL 614764, EPI\_ISL 614766 to 614775, EPI\_ISL 614777 to 614780, EPI\_ISL 614783 to 614801, EPI\_ISL 614803 to 614864, EPI\_ISL 614866 to 614885, EPI\_ISL 614887 to 614888, EPI\_ISL 615166 to 615167, EPI\_ISL 615169 to 615229, EPI\_ISL 615231 to 615233, EPI\_ISL 615235 to 615236, EPI\_ISL 615239 to 615246, EPI\_ISL 615266, EPI\_ISL 615268 to 615270, EPI\_ISL 615272 to 615275, EPI\_ISL 615277 to 615280, EPI\_ISL 615282 to 615286, EPI\_ISL 615288 to 615303, EPI\_ISL 615305 to 615325, EPI\_ISL 615327 to 615331, EPI\_ISL 615333, EPI\_ISL 615336, EPI\_ISL 615338 to 615343, EPI\_ISL 615345 to 615354, EPI\_ISL 615356 to 615364, EPI\_ISL 615366 to 615397, EPI\_ISL 615399 to 615412, EPI\_ISL 615414 to 615416, EPI\_ISL 615418 to 615422, EPI\_ISL 615424 to 615461, EPI\_ISL 615463 to 615475, EPI\_ISL 615477 to 615478, EPI\_ISL 615480 to 615499, EPI\_ISL 615501 to 615505, EPI\_ISL 615507 to 615510, EPI\_ISL 615512 to 615514, EPI\_ISL 615516 to 615520, EPI\_ISL 615522 to 615534, EPI\_ISL 615536 to 615547, EPI\_ISL 615549, EPI\_ISL 615551 to 615647, EPI\_ISL 615649 to 615661, EPI\_ISL 615663 to 615664, EPI\_ISL 615666 to 615677, EPI\_ISL 615679 to 615687, EPI\_ISL 615689 to 615712, EPI\_ISL 615714 to 615738, EPI\_ISL 615740 to 615747, EPI\_ISL 615749 to 615753, EPI\_ISL 615755 to 615777, EPI\_ISL 615779 to 615802, EPI\_ISL 615804 to 615810, EPI\_ISL 615812 to 615822, EPI\_ISL 615824 to 615838, EPI\_ISL 615840 to 615871, EPI\_ISL 615873 to 615876, EPI\_ISL 615879 to 615886, EPI\_ISL 615888 to 615902, EPI\_ISL 615904 to 615914, EPI\_ISL 615916 to 615922, EPI\_ISL 615924 to 615929, EPI\_ISL 615931 to 615935, EPI\_ISL 615937 to 615942, EPI\_ISL 615944 to 615989, EPI\_ISL 615991 to 616051, EPI\_ISL 616054 to 616057, EPI\_ISL 616059, EPI\_ISL 616061 to 616065, EPI\_ISL 616067 to 616070, EPI\_ISL 616072 to 616078, EPI\_ISL 616080 to 616100, EPI\_ISL 616102 to 616117, EPI\_ISL 616119 to 616128, EPI\_ISL 616131 to 616141, EPI\_ISL 616143 to 616175, EPI\_ISL 616177 to 616187, EPI\_ISL 616189 to 616199, EPI\_ISL 616201 to 616210, EPI\_ISL 616212 to 616283, EPI\_ISL 616285 to 616289, EPI\_ISL 616291 to 616303, EPI\_ISL 616305 to 616349, EPI\_ISL 616351 to 616371, EPI\_ISL 616373 to 616403, EPI\_ISL 616405 to 616410, EPI\_ISL 616412 to 616435, EPI\_ISL 616437 to 616479, EPI\_ISL 616481 to 616521, EPI\_ISL 616523 to 616536, EPI\_ISL 616538 to 616593, EPI\_ISL 616595 to 616604, EPI\_ISL 616606 to 616608, EPI\_ISL 616610 to 616641, EPI\_ISL 616643 to 616646, EPI\_ISL 616648 to 616657, EPI\_ISL 616659 to 616666, EPI\_ISL 616668 to 616687, EPI\_ISL 616689 to 616705, EPI\_ISL 616707 to 616711, EPI\_ISL 616713 to 616729, EPI\_ISL 616731, EPI\_ISL 616733 to 616734, EPI\_ISL 616736 to 616737, EPI\_ISL 616739 to 616739 to 616775, EPI\_ISL 616777 to 616787, EPI\_ISL 616789 to 616852, EPI\_ISL 616854 to 616884, EPI\_ISL 616886 to 616903, EPI\_ISL 616895 to 616909, EPI\_ISL 616911 to 616917, EPI\_ISL 616919, EPI\_ISL 616921, EPI\_ISL 616923, EPI\_ISL 616925 to 616928, EPI\_ISL 616930 to 616932, EPI\_ISL 616934 to 616948, EPI\_ISL 616950 to 616956, EPI\_ISL 616958 to 616965, EPI\_ISL 616968 to 616973, EPI\_ISL 616975 to 617002, EPI\_ISL 617004 to 617029, EPI\_ISL 617031 to 617057, EPI\_ISL 617059 to 617097, EPI\_ISL 617099 to 617100, EPI\_ISL 617102 to 617103, EPI\_ISL 617105 to 617106, EPI\_ISL 617108 to 617112, EPI\_ISL 617114 to 617116, EPI\_ISL 617118 to 617133, EPI\_ISL 617135 to 617142, EPI\_ISL 617144 to 617147, EPI\_ISL 617151 to 617158, EPI\_ISL 617160 to 617164, EPI\_ISL 617166 to 617173, EPI\_ISL 617175 to 617187, EPI\_ISL 617189 to 617209, EPI\_ISL 617211 to 617227, EPI\_ISL 617229 to 617235, EPI\_ISL 617237 to 617241, EPI\_ISL 617243 to 617246, EPI\_ISL 617249 to 617266, EPI\_ISL 617268 to 617269, EPI\_ISL 617271 to 617275, EPI\_ISL 617277 to 617290, EPI\_ISL 617292 to 617294, EPI\_ISL 617296 to 617297, EPI\_ISL 617300, EPI\_ISL 617302, EPI\_ISL 617304 to 617312, EPI\_ISL 617315 to 617317, EPI\_ISL 617319 to 617322, EPI\_ISL 617325 to 617326, EPI\_ISL 617328 to 617330, EPI\_ISL 617332 to 617334, EPI\_ISL 617336 to 617348, EPI\_ISL 617339 to 617352, EPI\_ISL 617354 to 617359, EPI\_ISL 617361 to 617366, EPI\_ISL 617368 to 617391, EPI\_ISL 617393 to 617403, EPI\_ISL 617405 to 617435, EPI\_ISL 617437 to 617438, EPI\_ISL 617440 to 617456, EPI\_ISL 617458 to 617473, EPI\_ISL 617475 to 617516, EPI\_ISL 617518 to 617563, EPI\_ISL 617565 to 617577, EPI\_ISL 617579 to 617596, EPI\_ISL 617598, EPI\_ISL 617600 to 617610, EPI\_ISL 617612 to 617629, EPI\_ISL 617630 to 617633, EPI\_ISL 617635 to 617646, EPI\_ISL 617648 to 617656, EPI\_ISL 617658 to 617683, EPI\_ISL 617685 to 617691, EPI\_ISL 617693 to 617696, EPI\_ISL 617698 to 617706, EPI\_ISL 617708 to 617714, EPI\_ISL 617716 to 617725, EPI\_ISL 617728 to 617740, EPI\_ISL 617750 to 617756, EPI\_ISL 617758 to 617763, EPI\_ISL 617765 to 617794, EPI\_ISL 617796 to 617958, EPI\_ISL 617959 to 617974, EPI\_ISL 617976 to 617977

|           |                                                                                              |                                                                                    |                                                                  |
|-----------|----------------------------------------------------------------------------------------------|------------------------------------------------------------------------------------|------------------------------------------------------------------|
| see above | Department of Virus and Microbiological Special Diagnostics, Statens Serum Institut, Denmark | Albertsen lab, Department of Chemistry and Bioscience, Aalborg University, Denmark | Danish Corona Genome Consortia; Danish Covid-19 Genome Consortia |
|-----------|----------------------------------------------------------------------------------------------|------------------------------------------------------------------------------------|------------------------------------------------------------------|

|                                                                                                                                                                                                                                                                                                                                                                                                                                                                                                                                                                                                                                                               |                                                                                                                                        |                                                                                                                                                                                                                                            |                                                                                                                                                                                                                                                                                                                                                                                                                                                                                                                                                                   |
|---------------------------------------------------------------------------------------------------------------------------------------------------------------------------------------------------------------------------------------------------------------------------------------------------------------------------------------------------------------------------------------------------------------------------------------------------------------------------------------------------------------------------------------------------------------------------------------------------------------------------------------------------------------|----------------------------------------------------------------------------------------------------------------------------------------|--------------------------------------------------------------------------------------------------------------------------------------------------------------------------------------------------------------------------------------------|-------------------------------------------------------------------------------------------------------------------------------------------------------------------------------------------------------------------------------------------------------------------------------------------------------------------------------------------------------------------------------------------------------------------------------------------------------------------------------------------------------------------------------------------------------------------|
| EPI_ISL_415647, EPI_ISL_416140 to 416142                                                                                                                                                                                                                                                                                                                                                                                                                                                                                                                                                                                                                      | Department of Virus and Microbiological Special diagnostics, Statens Serum Institut, Copenhagen, Denmark.                              | Statens Serum Institute                                                                                                                                                                                                                    | Anders Fomsgaard; Maiken Worsøe Rosenstjerne; Morten Rasmussen                                                                                                                                                                                                                                                                                                                                                                                                                                                                                                    |
| EPI_ISL_415646, EPI_ISL_415648, EPI_ISL_416143 to 416144, EPI_ISL_416153                                                                                                                                                                                                                                                                                                                                                                                                                                                                                                                                                                                      | Department of Virus and Microbiological Special diagnostics, Statens Serum Institut, Copenhagen, Denmark.                              | VIUFU                                                                                                                                                                                                                                      | Anders Fomsgaard; Maiken Worsøe Rosenstjerne; Morten Rasmussen                                                                                                                                                                                                                                                                                                                                                                                                                                                                                                    |
| EPI_ISL_775346 to 775347                                                                                                                                                                                                                                                                                                                                                                                                                                                                                                                                                                                                                                      | Department of medical microbiology, section Aalesund, Aalesund Hospital                                                                | Norwegian Institute of Public Health, Department of Virology                                                                                                                                                                               | Atiya R Ali; Hilde Elshaug; Hilde Vollan; Kamilla Heddeland Instefjord; Karoline Bragstad; Kathrine Stene-Johansen; Marie Paulsen Madsen; Olav Hungnes; Rasmus Riis Kopperud                                                                                                                                                                                                                                                                                                                                                                                      |
| EPI_ISL_496482                                                                                                                                                                                                                                                                                                                                                                                                                                                                                                                                                                                                                                                | Dept. Infectious, Tropical Diseases & Microbiology, IRCCS Sacro Cuore Don Calabria Hospital                                            | 1) Dept. Infectious, Tropical Diseases & Microbiology, IRCCS Sacro Cuore Don Calabria Hospital; 2) Centro Piattaforme Tecnologiche, University of Verona; 3) Dept. Neurosciences, Biomedicine and Movement Sciences, University of Verona. | 1) Antonio Mori; 2) Monica Castellucci and Francesca Griggio; 3) Giovanni Malerba; Chiara Piubelli; Elena Pomari; Michela Deiana                                                                                                                                                                                                                                                                                                                                                                                                                                  |
| EPI_ISL_449789 to 449794, EPI_ISL_590877, EPI_ISL_590953 to 590977, EPI_ISL_591021, EPI_ISL_635120, EPI_ISL_775280, EPI_ISL_775314, EPI_ISL_775327 to 775329, EPI_ISL_775353 to 775355, EPI_ISL_775386, EPI_ISL_796658, EPI_ISL_796663, EPI_ISL_796677, EPI_ISL_796698, EPI_ISL_860289                                                                                                                                                                                                                                                                                                                                                                        | Dept. of Medical Microbiology, Stavanger University Hospital, Helse Stavanger HF                                                       | Norwegian Institute of Public Health, Department of Virology                                                                                                                                                                               | Atiya R Ali; Hilde Elshaug; Hilde Vollan; Iren Løhr; Kamilla Heddeland Instefjord; Karoline Bragstad; Kathrine Stene-Johansen; Marie Paulsen Madsen; Olav Hungnes; Rasmus Riis Kopperud                                                                                                                                                                                                                                                                                                                                                                           |
| EPI_ISL_447837                                                                                                                                                                                                                                                                                                                                                                                                                                                                                                                                                                                                                                                | Dept. of Medical Microbiology, Stavanger University Hospital, Helse Stavanger HF,                                                      | Norwegian Institute of Public Health, Department of Virology                                                                                                                                                                               | Hilde Elshaug; Kamilla Heddeland Instefjord; Karoline Bragstad; Kathrine Stene-Johansen; Olav Hungnes; Rasmus Riis Kopperud                                                                                                                                                                                                                                                                                                                                                                                                                                       |
| EPI_ISL_664101, EPI_ISL_664103, EPI_ISL_664105 to 664106, EPI_ISL_665254 to 665257, EPI_ISL_665259 to 665260, EPI_ISL_666568, EPI_ISL_666593 to 666608, EPI_ISL_666610 to 666612, EPI_ISL_666614 to 666615                                                                                                                                                                                                                                                                                                                                                                                                                                                    | Dept. of Microbiology and Infection Control, Akershus University Hospital HF                                                           | Dept. of Microbiology and Infection Control, Akershus University Hospital HF                                                                                                                                                               | Alexander Hesselberg Løvestad; Hege Vangstein Aamot; Nina Handal; Ole Herman Ambur; Silje Bakken Jørgensen                                                                                                                                                                                                                                                                                                                                                                                                                                                        |
| EPI_ISL_807155                                                                                                                                                                                                                                                                                                                                                                                                                                                                                                                                                                                                                                                | Deva County Emergency Hospital                                                                                                         | National Institute of Infectious Diseases-Prof. Dr. Matei Bals Molecular Diagnostics Laboratory                                                                                                                                            | Andreea Tudor; Corina Casangiu; Dan Otelea; Leontina Banica; Marius Surlea; Petre Milu; Simona Paraschiv                                                                                                                                                                                                                                                                                                                                                                                                                                                          |
| EPI_ISL_437197 to 437203, EPI_ISL_437298 to 437303, EPI_ISL_653916                                                                                                                                                                                                                                                                                                                                                                                                                                                                                                                                                                                            | Diagnostic- and Research Institute of Pathology, Medical University of Graz                                                            | Diagnostic- and Research Institute of Pathology, Medical University of Graz                                                                                                                                                                | Gregor Gorkiewicz; Karl Kashofer; Martin Zacharias; Peter Regitnig                                                                                                                                                                                                                                                                                                                                                                                                                                                                                                |
| EPI_ISL_413573                                                                                                                                                                                                                                                                                                                                                                                                                                                                                                                                                                                                                                                | Dienst Gezondheid & Jeugd Zuid-Holland Zuid                                                                                            | Erasmus Medical Center                                                                                                                                                                                                                     | Anne van der Linden; Anнемiek van der Eijk; Aura Timen; Bas Oude Munnink; Claudia Schapendonk; Corien Swaan; Corine GeurtsvanKessel; David Nieuwenhuijse; Irina Chestakova; Jeroen van Kampen; Jolanda Voermans; Madelief Molters; Manon Haverkate; Marion Koopmans; Mark Pronk; Mart Stein; Pascal Lexmond; Reina Sikkema; Richard Molenkamp; Sandra Kengne Kamba Mobou; on behalf of the Dutch national COVID-19 response team.                                                                                                                                 |
| EPI_ISL_751196 to 751200                                                                                                                                                                                                                                                                                                                                                                                                                                                                                                                                                                                                                                      | Dienststelle Gesundheit und Sport Kanton Luzern                                                                                        | Institute of Medical Virology, University of Zurich                                                                                                                                                                                        | Alexandra Trkola; Claudia Schmutz; Eva Spieler; Gabriela Ziltener; Jürg Böni; Kevin Steiner; Maryam Zaheri; Michael Huber; Stefan Schmutz; Verena Küfner                                                                                                                                                                                                                                                                                                                                                                                                          |
| EPI_ISL_452234, EPI_ISL_475512, EPI_ISL_475562 to 475563                                                                                                                                                                                                                                                                                                                                                                                                                                                                                                                                                                                                      | Din Klinik                                                                                                                             | The Public Health Agency of Sweden                                                                                                                                                                                                         | Anna Risberg; Anna-Malin Linde; Helene Warnborg; Karin Tegmark-Wisell; Maria Lind Karlberg; Mattias Haukland; Mia Brytting; Olov Svartstrom; Oskar Karlsson Lindsjö; Reza Advani; Sandra Brodsson; Theresa Enkirsch                                                                                                                                                                                                                                                                                                                                               |
| EPI_ISL_591326 to 591338, EPI_ISL_591340                                                                                                                                                                                                                                                                                                                                                                                                                                                                                                                                                                                                                      | Dipartimento di Biotecnologie Mediche, University of Siena                                                                             | Dipartimento di Biotecnologie Mediche, University of Siena                                                                                                                                                                                 | Anichini, G.; COVID; Cusi; Gandolfo, C.; M.G.; Pinzatti, D.; Pozzi, G.; Santoro, F.                                                                                                                                                                                                                                                                                                                                                                                                                                                                               |
| EPI_ISL_722855 to 722858, EPI_ISL_722872, EPI_ISL_722896 to 722897, EPI_ISL_722899, EPI_ISL_722912                                                                                                                                                                                                                                                                                                                                                                                                                                                                                                                                                            | Dipartimento di Scienze Biomediche e Oncologia Umana - Azienda Ospedaliero Universitaria Consorziale Policlinico                       | Istituto Zooprofilattico Sperimentale della Puglia e della Basilicata                                                                                                                                                                      | Bianco A.; Capozzi L.; Chironna M.; Del Sambio L.; Loconsole D.; Parisi A.                                                                                                                                                                                                                                                                                                                                                                                                                                                                                        |
| EPI_ISL_738139, EPI_ISL_738141 to 738142, EPI_ISL_747370, EPI_ISL_747421, EPI_ISL_760096 to 760097, EPI_ISL_760129, EPI_ISL_760132, EPI_ISL_760135, EPI_ISL_760137 to 760153, EPI_ISL_760156 to 760157, EPI_ISL_760189 to 760190, EPI_ISL_760202 to 760205, EPI_ISL_760214, EPI_ISL_760225, EPI_ISL_850235, EPI_ISL_850237, EPI_ISL_850253, EPI_ISL_850261, EPI_ISL_850277, EPI_ISL_850283 to 850287, EPI_ISL_850291 to 850292, EPI_ISL_850294, EPI_ISL_850305, EPI_ISL_850314 to 850315, EPI_ISL_850319, EPI_ISL_850347, EPI_ISL_850356, EPI_ISL_850653 to 850662                                                                                            | Division of Emerging Infectious Diseases, Bureau of Infectious Diseases Diagnosis Control, Korea Disease Control and Prevention Agency | Division of Emerging Infectious Diseases, Bureau of Infectious Diseases Diagnosis Control, Korea Disease Control and Prevention Agency                                                                                                     | Ae Kyung Park; Chaeyoung Lee; Eun-Jin Kim; Heui Man Kim; Il-Hwan Kim; Jeong-Min Kim; Namjoo Lee; Sang Hee Woo                                                                                                                                                                                                                                                                                                                                                                                                                                                     |
| EPI_ISL_485603                                                                                                                                                                                                                                                                                                                                                                                                                                                                                                                                                                                                                                                | Division of Infectious Disease                                                                                                         | Steininger Lab                                                                                                                                                                                                                             | Christoph Steininger; Ingeborg Klymiuk; Jakob Thannesberger; Lorenz Schubert; Nicolas Rascovan; Oliver Robak                                                                                                                                                                                                                                                                                                                                                                                                                                                      |
| EPI_ISL_508864 to 508870, EPI_ISL_509222                                                                                                                                                                                                                                                                                                                                                                                                                                                                                                                                                                                                                      | Division of Infectious Diseases and Hospital Epidemiology, University Hospital Zürich                                                  | Institute of Medical Virology, University of Zurich                                                                                                                                                                                        | Aline Wolfensberger; Dana Weissberg; Hugo Sax; Irene A. Abela; Jürg Böni; Maryam Zaheri; Michael Huber; Peter W. Schreiber; Silvana K. Rampini; Verena Küfner                                                                                                                                                                                                                                                                                                                                                                                                     |
| EPI_ISL_413022 to 413024                                                                                                                                                                                                                                                                                                                                                                                                                                                                                                                                                                                                                                      | Division of Infectious Diseases, University Hospital Zurich                                                                            | Institute of Medical Virology, University of Zurich                                                                                                                                                                                        | Alexandra Trkola; Andrea Zbinden; Fiona Steiner; Gabriela Ziltener; Jon Huder; Jürg Böni; Maryam Zaheri; Michael Huber; Patrick Redli; Riccarda Capaul; Roberto Speck; Stefan Schmutz; Verena Küfner                                                                                                                                                                                                                                                                                                                                                              |
| EPI_ISL_524475, EPI_ISL_524477, EPI_ISL_524483, EPI_ISL_524485                                                                                                                                                                                                                                                                                                                                                                                                                                                                                                                                                                                                | Division of Infectious Diseases, University Hospital Zürich                                                                            | Institute of Medical Virology, University of Zurich                                                                                                                                                                                        | Alexandra Trkola; Andrea Zbinden; Fiona Steiner; Gabriela Ziltener; Jon Huder; Jürg Böni; Maryam Zaheri; Michael Huber; Patrick Redli; Riccarda Capaul; Stefan Schmutz; Verena Küfner                                                                                                                                                                                                                                                                                                                                                                             |
| EPI_ISL_722209                                                                                                                                                                                                                                                                                                                                                                                                                                                                                                                                                                                                                                                | Dom Zdravlja Sarajevo                                                                                                                  | Allea Genetic Center                                                                                                                                                                                                                       | Konjhodzic R.; Pecar D.; Salihefendic L.                                                                                                                                                                                                                                                                                                                                                                                                                                                                                                                          |
| EPI_ISL_766589 to 766590                                                                                                                                                                                                                                                                                                                                                                                                                                                                                                                                                                                                                                      | Dr. Boubaker Karim laboratory                                                                                                          | Institute of Medical Virology, University of Zurich                                                                                                                                                                                        | Alexandra Trkola; Annette Audigé; Cyril Shah; Jon Huder; Jürg Böni; Kevin Steiner; Maria Grünberg; Maryam Zaheri; Michael Huber; Riccarda Capaul; Stefan Schmutz; Verena Küfner                                                                                                                                                                                                                                                                                                                                                                                   |
| EPI_ISL_583727 to 583733, EPI_ISL_583735 to 583763, EPI_ISL_583765 to 583771, EPI_ISL_583773 to 583814, EPI_ISL_583816 to 583831, EPI_ISL_583834 to 583852                                                                                                                                                                                                                                                                                                                                                                                                                                                                                                    | Dr. Gernot Walder GmbH                                                                                                                 | Berghthaler laboratory, CeMM Research Center for Molecular Medicine of the Austrian Academy of Sciences                                                                                                                                    | Adi Steinrigl; Alexander Lercher; Alexandra Popa; Andreas Berghthaler; Benedikt Agerer; Christian Paar; Christoph Bock; Daniela Schmid; Dorothee von Laer; Elisabeth Puchhammer-Stoeckl; Franz Allerberger; Gernot Walder; Gregor Hörmann; Guenter Weiss; Gunther Vogl; Henrike Colaco; Jakob-Wendelin Genger; Jan Laine; Judith Aberle; Kinga Rigler-Hohenwarter; Lukas Endler; Manfred Naiz; Mark Smyth; Martin Senekowitsch; Michael Schuster; Peter Hufnagl; Peter Obrist; Rainer Gattlinger; Sabine Sussitz-Rack; Stephan Aberle; Thomas Penz; Wegene Borena |
| EPI_ISL_414423 to 414446, EPI_ISL_414448 to 414471, EPI_ISL_414529 to 414545, EPI_ISL_414547 to 414566, EPI_ISL_415460 to 415463, EPI_ISL_415465 to 415492, EPI_ISL_415495 to 415498, EPI_ISL_415500 to 415506, EPI_ISL_415510 to 415516, EPI_ISL_415524 to 415535, EPI_ISL_422566 to 422574, EPI_ISL_422576 to 422589, EPI_ISL_422591 to 422612, EPI_ISL_422615 to 422635, EPI_ISL_422637 to 422881, EPI_ISL_422885 to 422899, EPI_ISL_422901 to 422960, EPI_ISL_423034, EPI_ISL_455112 to 455149, EPI_ISL_455151 to 455180, EPI_ISL_455195 to 455200, EPI_ISL_455202 to 455222, EPI_ISL_455226 to 455239, EPI_ISL_455241 to 455242, EPI_ISL_455244 to 45525 |                                                                                                                                        |                                                                                                                                                                                                                                            |                                                                                                                                                                                                                                                                                                                                                                                                                                                                                                                                                                   |

|                                                                                                                                                                                                                                                                                                                                                                                                                                                                                                                                                                                                                                                                                                                                                                                                                                                                                                                                                                                                                                                                                                                                                                                                                                                    |                                                                                                                                          |                                                                                                                                                                      |                                                                                                                                                                                                                                                                                                                                                                                                                                                                                                                                                                                                                                                                                                                                                                                 |                                                                                                                                                                                                                   |  |  |  |
|----------------------------------------------------------------------------------------------------------------------------------------------------------------------------------------------------------------------------------------------------------------------------------------------------------------------------------------------------------------------------------------------------------------------------------------------------------------------------------------------------------------------------------------------------------------------------------------------------------------------------------------------------------------------------------------------------------------------------------------------------------------------------------------------------------------------------------------------------------------------------------------------------------------------------------------------------------------------------------------------------------------------------------------------------------------------------------------------------------------------------------------------------------------------------------------------------------------------------------------------------|------------------------------------------------------------------------------------------------------------------------------------------|----------------------------------------------------------------------------------------------------------------------------------------------------------------------|---------------------------------------------------------------------------------------------------------------------------------------------------------------------------------------------------------------------------------------------------------------------------------------------------------------------------------------------------------------------------------------------------------------------------------------------------------------------------------------------------------------------------------------------------------------------------------------------------------------------------------------------------------------------------------------------------------------------------------------------------------------------------------|-------------------------------------------------------------------------------------------------------------------------------------------------------------------------------------------------------------------|--|--|--|
| EPI_ISL_454750 to 454767, EPI_ISL_454769 to 454794, EPI_ISL_547455 to 547458, EPI_ISL_547460 to 547465, EPI_ISL_547469 to 547470, EPI_ISL_547473 to 547486, EPI_ISL_547491 to 547499, EPI_ISL_547501 to 547509, EPI_ISL_547511, EPI_ISL_547513 to 547522, EPI_ISL_547524 to 547529, EPI_ISL_547531 to 547534, EPI_ISL_547536 to 547539, EPI_ISL_547541, EPI_ISL_547557 to 547560, EPI_ISL_636491, EPI_ISL_636494 to 636504, EPI_ISL_636506 to 636507, EPI_ISL_636511, EPI_ISL_636525 to 636526, EPI_ISL_636528 to 636544, EPI_ISL_636546 to 636561, EPI_ISL_636564 to 636585, EPI_ISL_636587 to 636591, EPI_ISL_636593, EPI_ISL_636598, EPI_ISL_636600 to 636603, EPI_ISL_723155 to 723467, EPI_ISL_728564 to 728763, EPI_ISL_747521 to 747525, EPI_ISL_790570 to 790577, EPI_ISL_790579 to 790596, EPI_ISL_790598 to 790623, EPI_ISL_790627 to 791083, EPI_ISL_804379 to 804462, EPI_ISL_823976 to 823988, EPI_ISL_823990 to 824095, EPI_ISL_824101 to 824140, EPI_ISL_824142 to 824144, EPI_ISL_824151 to 824152, EPI_ISL_824155 to 824168, EPI_ISL_824170 to 824208, EPI_ISL_824210 to 824252, EPI_ISL_824255 to 824260, EPI_ISL_824265 to 824266, EPI_ISL_824269, EPI_ISL_824271 to 824278, EPI_ISL_824281 to 824283, EPI_ISL_826523 to 826536 |                                                                                                                                          |                                                                                                                                                                      |                                                                                                                                                                                                                                                                                                                                                                                                                                                                                                                                                                                                                                                                                                                                                                                 | Marjan Boter; Mark Pronk; Mart Stein; Pascal Lexmond; Reina Sikkema; Richard Molenkamp; Sandra Kengne Kamga Mobou; Stefan van Nieuwkoop; Theo Bestebroer; on behalf of the Dutch national COVID-19 response team. |  |  |  |
| see above                                                                                                                                                                                                                                                                                                                                                                                                                                                                                                                                                                                                                                                                                                                                                                                                                                                                                                                                                                                                                                                                                                                                                                                                                                          | Dutch COVID-19 response team                                                                                                             | National Institute for Public Health and the Environment (RIVM)                                                                                                      | Adam Meijer; AnneMarie van den Brandt; Bas van der Veer; Chantal Reusken; Dennis Schmitz; Dirk Eggink; Florian Zwagemaker; Harry Vennema; Jeroen Cremer; Matthijs Welkers; Pieter Overduin; Sharon van den Brink; on behalf of the national COVID-19 response team                                                                                                                                                                                                                                                                                                                                                                                                                                                                                                              |                                                                                                                                                                                                                   |  |  |  |
| EPI_ISL_419691                                                                                                                                                                                                                                                                                                                                                                                                                                                                                                                                                                                                                                                                                                                                                                                                                                                                                                                                                                                                                                                                                                                                                                                                                                     | E. Gulbja Laboratorija                                                                                                                   | Charite Universitätsmedizin Berlin, Institute of Virology                                                                                                            | Barbara Mühlemann; Christian Drosten; Dmitrijs Perminovs; Dr. Didzis Gavars; Jörn Beheim-Schwarzbach; Julia Schneider; Mikus Gavars; Talitha Veith; Terry Jones; Victor M Corman                                                                                                                                                                                                                                                                                                                                                                                                                                                                                                                                                                                                |                                                                                                                                                                                                                   |  |  |  |
| EPI_ISL_421653 to 421656, EPI_ISL_426285 to 426289, EPI_ISL_450518 to 450519, EPI_ISL_492993 to 493000, EPI_ISL_501275, EPI_ISL_501284 to 501285, EPI_ISL_501823, EPI_ISL_501829, EPI_ISL_501833, EPI_ISL_501839, EPI_ISL_501849, EPI_ISL_501894, EPI_ISL_501929, EPI_ISL_501936, EPI_ISL_512313 to 512314, EPI_ISL_512645 to 512646, EPI_ISL_515187 to 515195, EPI_ISL_534199, EPI_ISL_534203, EPI_ISL_534212 to 534216, EPI_ISL_534218 to 534219, EPI_ISL_534221, EPI_ISL_639631, EPI_ISL_639635, EPI_ISL_639637 to 639638, EPI_ISL_639641, EPI_ISL_639643 to 639647, EPI_ISL_639649, EPI_ISL_639652 to 639653, EPI_ISL_639658 to 639662, EPI_ISL_639664 to 639671, EPI_ISL_639673 to 639675, EPI_ISL_639681 to 639682, EPI_ISL_639684 to 639694, EPI_ISL_770033 to 770037, EPI_ISL_770040 to 770041, EPI_ISL_770043 to 770044, EPI_ISL_770046, EPI_ISL_770050 to 770051, EPI_ISL_770053, EPI_ISL_770055, EPI_ISL_770057, EPI_ISL_770062                                                                                                                                                                                                                                                                                                         |                                                                                                                                          |                                                                                                                                                                      |                                                                                                                                                                                                                                                                                                                                                                                                                                                                                                                                                                                                                                                                                                                                                                                 |                                                                                                                                                                                                                   |  |  |  |
| see above                                                                                                                                                                                                                                                                                                                                                                                                                                                                                                                                                                                                                                                                                                                                                                                                                                                                                                                                                                                                                                                                                                                                                                                                                                          | E. Gulbja Laboratorija                                                                                                                   | Latvian Biomedical Research and Study Centre                                                                                                                         | Dmitrijs Perminovs; Ivars Silamielis; Jnis Kloviš; Jnis Pjalkovskis; Kaspars Megnis; Mikus Gavars; Monta Ustinova; Uga Dumpis; Vita Rovte; ikita Zrelovs                                                                                                                                                                                                                                                                                                                                                                                                                                                                                                                                                                                                                        |                                                                                                                                                                                                                   |  |  |  |
| EPI_ISL_486438                                                                                                                                                                                                                                                                                                                                                                                                                                                                                                                                                                                                                                                                                                                                                                                                                                                                                                                                                                                                                                                                                                                                                                                                                                     | E. Gulbja laboratorija                                                                                                                   | Latvian Biomedical Research and Study Centre                                                                                                                         | Dmitrijs Perminovs; Ivars Silamielis; Jnis Kloviš; Kaspars Megnis; Mikus Gavars; Monta Ustinova; Uga Dumpis; Vita Rovte; ikita Zrelovs                                                                                                                                                                                                                                                                                                                                                                                                                                                                                                                                                                                                                                          |                                                                                                                                                                                                                   |  |  |  |
| EPI_ISL_418226                                                                                                                                                                                                                                                                                                                                                                                                                                                                                                                                                                                                                                                                                                                                                                                                                                                                                                                                                                                                                                                                                                                                                                                                                                     | EHPAD - Résidences les Cèdres                                                                                                            | National Reference Center for Viruses of Respiratory Infections, Institut Pasteur, Paris                                                                             | Angela Brisebarre; Etienne Simon-Lorière; Flora Donati; Marion Barbet; Maud Vanpee; Mélanie Albert; Méline Bizard; Sylvie Behillil; Sylvie van der Werf; Vincent Enouf                                                                                                                                                                                                                                                                                                                                                                                                                                                                                                                                                                                                          |                                                                                                                                                                                                                   |  |  |  |
| EPI_ISL_434652, EPI_ISL_710610 to 710611                                                                                                                                                                                                                                                                                                                                                                                                                                                                                                                                                                                                                                                                                                                                                                                                                                                                                                                                                                                                                                                                                                                                                                                                           | Ektorps Vardcentral                                                                                                                      | The Public Health Agency of Sweden                                                                                                                                   | Anna Risberg; Anna-Malin Linde; Department of Microbiology; Eva Espmark; Karin Tegmark-Wisell; Maria Lind Karlberg; Mia Brytting; Olov Svartstrom; Oskar Karlsson Lindsjö; The Public Health Agency of Sweden; Theresa Enkirch                                                                                                                                                                                                                                                                                                                                                                                                                                                                                                                                                  |                                                                                                                                                                                                                   |  |  |  |
| EPI_ISL_486854                                                                                                                                                                                                                                                                                                                                                                                                                                                                                                                                                                                                                                                                                                                                                                                                                                                                                                                                                                                                                                                                                                                                                                                                                                     | Emergency County Hospital Suceava                                                                                                        | Stefan cel Mare, University Metagenomics lab                                                                                                                         | Lobiuc Andrei et al.                                                                                                                                                                                                                                                                                                                                                                                                                                                                                                                                                                                                                                                                                                                                                            |                                                                                                                                                                                                                   |  |  |  |
| EPI_ISL_486855                                                                                                                                                                                                                                                                                                                                                                                                                                                                                                                                                                                                                                                                                                                                                                                                                                                                                                                                                                                                                                                                                                                                                                                                                                     | Emergency county Hospital Suceava                                                                                                        | "Stefan cel Mare" University Metagenomics Lab                                                                                                                        | Lobiuc Andrei et al.                                                                                                                                                                                                                                                                                                                                                                                                                                                                                                                                                                                                                                                                                                                                                            |                                                                                                                                                                                                                   |  |  |  |
| EPI_ISL_413582                                                                                                                                                                                                                                                                                                                                                                                                                                                                                                                                                                                                                                                                                                                                                                                                                                                                                                                                                                                                                                                                                                                                                                                                                                     | ErasmusMC                                                                                                                                | Erasmus Medical Center                                                                                                                                               |                                                                                                                                                                                                                                                                                                                                                                                                                                                                                                                                                                                                                                                                                                                                                                                 |                                                                                                                                                                                                                   |  |  |  |
| EPI_ISL_648166 to 648168                                                                                                                                                                                                                                                                                                                                                                                                                                                                                                                                                                                                                                                                                                                                                                                                                                                                                                                                                                                                                                                                                                                                                                                                                           | Eskilstuna                                                                                                                               | The Public Health Agency of Sweden                                                                                                                                   | Anna Risberg; Anna-Malin Linde; Karin Tegmark-Wisell; Maria Lind Karlberg; Mattias Haukland; Mia Brytting; Olov Svartstrom; Oskar Karlsson Lindsjö; Petra Edquist; Reza Advani; Sandra Broddesson                                                                                                                                                                                                                                                                                                                                                                                                                                                                                                                                                                               |                                                                                                                                                                                                                   |  |  |  |
| EPI_ISL_636970                                                                                                                                                                                                                                                                                                                                                                                                                                                                                                                                                                                                                                                                                                                                                                                                                                                                                                                                                                                                                                                                                                                                                                                                                                     | Etlik Veterinary Control Central Research Institute                                                                                      | Etlik Veterinary Control Central Research Institute                                                                                                                  | Ahu Pakdemirli; Cevdet Yarali; Dilek Dulger; Erdem Danyer; Ozcan Yildirim; Sabri Hacıoglu; Ummu Sena Sari                                                                                                                                                                                                                                                                                                                                                                                                                                                                                                                                                                                                                                                                       |                                                                                                                                                                                                                   |  |  |  |
| EPI_ISL_614265 to 614280                                                                                                                                                                                                                                                                                                                                                                                                                                                                                                                                                                                                                                                                                                                                                                                                                                                                                                                                                                                                                                                                                                                                                                                                                           | Eurofins                                                                                                                                 | National Reference Center for Viruses of Respiratory Infections, Institut Pasteur, Paris                                                                             | Angela Brisebarre; Camille Capel; Etienne Simon-Lorière; Marion Barbet; Maud Vanpee; Méline Bizard; Sylvie Behillil; Sylvie van der Werf; Vincent Enouf                                                                                                                                                                                                                                                                                                                                                                                                                                                                                                                                                                                                                         |                                                                                                                                                                                                                   |  |  |  |
| EPI_ISL_602282 to 602303                                                                                                                                                                                                                                                                                                                                                                                                                                                                                                                                                                                                                                                                                                                                                                                                                                                                                                                                                                                                                                                                                                                                                                                                                           | Evangelisches Klinikum Bethel, Institut für Laboratoriumsmedizin, Mikrobiologie und Hygiene                                              | Bielefeld University                                                                                                                                                 | Alexander Sczyrba; Christiane Scherer; David Brandt; Jörn Kalinowski; Levin-Joe Klages; Marina Simunovic; Markus Haak; Svenja Vinke; Tobias Busche                                                                                                                                                                                                                                                                                                                                                                                                                                                                                                                                                                                                                              |                                                                                                                                                                                                                   |  |  |  |
| EPI_ISL_833046, EPI_ISL_833068 to 833075                                                                                                                                                                                                                                                                                                                                                                                                                                                                                                                                                                                                                                                                                                                                                                                                                                                                                                                                                                                                                                                                                                                                                                                                           | FPAM                                                                                                                                     | Istituto Zooprofilattico Sperimentale dell'Abruzzo e Molise "G. Caporale"                                                                                            | Ancora M; Calistri P; Cammà C; Curini V; Delli Compagni E; Di Domenico M; Di Pasquale A; Lorusso A; Mangone I; Marcacci M; Puglia I; Rinaldi A; Savini G                                                                                                                                                                                                                                                                                                                                                                                                                                                                                                                                                                                                                        |                                                                                                                                                                                                                   |  |  |  |
| EPI_ISL_428851 to 428852                                                                                                                                                                                                                                                                                                                                                                                                                                                                                                                                                                                                                                                                                                                                                                                                                                                                                                                                                                                                                                                                                                                                                                                                                           | FSBSI "Chumakov Federal Scientific Center for Research and Development of Immune-and-Biological Products of Russian Academy of Sciences" | FSBSI "Chumakov Federal Scientific Center for Research and Development of Immune-and-Biological Products of Russian Academy of Sciences" & NRC "Kurchatov institute" | Anastasia Berestovskaya; Anastasia Piniaeva; Anna Shishova; Aydar Ishmukhametov; Denis Protsenko; Egor Prokhorchuk; Georgy Ignatyev; Liubov Kozlovskaya; Mikhail Rychev                                                                                                                                                                                                                                                                                                                                                                                                                                                                                                                                                                                                         |                                                                                                                                                                                                                   |  |  |  |
| EPI_ISL_417010, EPI_ISL_418252                                                                                                                                                                                                                                                                                                                                                                                                                                                                                                                                                                                                                                                                                                                                                                                                                                                                                                                                                                                                                                                                                                                                                                                                                     | FUNDACION JIMENEZ DIAZ                                                                                                                   | Instituto de Salud Carlos III                                                                                                                                        | A. Monzón; F. Casas; I. Fernández Roblas, R.; I. Jiménez; Iglesias-Caballero; M. Camarero; M. Cuesta; M. González-Esguevillas; M. Molinero Calamita; M. Zaballos; P. Jiménez; S. Juliá; S. Pozo; S. Varona                                                                                                                                                                                                                                                                                                                                                                                                                                                                                                                                                                      |                                                                                                                                                                                                                   |  |  |  |
| EPI_ISL_510533 to 510534                                                                                                                                                                                                                                                                                                                                                                                                                                                                                                                                                                                                                                                                                                                                                                                                                                                                                                                                                                                                                                                                                                                                                                                                                           | Faculty of Medicine, Bursa Uludag University                                                                                             | Bursa Uludag University                                                                                                                                              | Alemdar, A.; S.G.; Saglik, I.; Temel; Özemri Sa, .                                                                                                                                                                                                                                                                                                                                                                                                                                                                                                                                                                                                                                                                                                                              |                                                                                                                                                                                                                   |  |  |  |
| EPI_ISL_526937 to 526941, EPI_ISL_526943 to 526944, EPI_ISL_526946 to 526948, EPI_ISL_614298, EPI_ISL_614301 to 614302, EPI_ISL_614304, EPI_ISL_614307 to 614308, EPI_ISL_614310 to 614313, EPI_ISL_614316                                                                                                                                                                                                                                                                                                                                                                                                                                                                                                                                                                                                                                                                                                                                                                                                                                                                                                                                                                                                                                         |                                                                                                                                          |                                                                                                                                                                      |                                                                                                                                                                                                                                                                                                                                                                                                                                                                                                                                                                                                                                                                                                                                                                                 |                                                                                                                                                                                                                   |  |  |  |
| see above                                                                                                                                                                                                                                                                                                                                                                                                                                                                                                                                                                                                                                                                                                                                                                                                                                                                                                                                                                                                                                                                                                                                                                                                                                          | Faroese National Reference Laboratory for Fish and Animal Diseases                                                                       | Faroese National Reference Laboratory for Fish and Animal Diseases                                                                                                   | Debes Hammershaimb Christiansen; Maria Marjunardóttir Dahl; Petra Elisabeth Petersen                                                                                                                                                                                                                                                                                                                                                                                                                                                                                                                                                                                                                                                                                            |                                                                                                                                                                                                                   |  |  |  |
| EPI_ISL_451963 to 451970                                                                                                                                                                                                                                                                                                                                                                                                                                                                                                                                                                                                                                                                                                                                                                                                                                                                                                                                                                                                                                                                                                                                                                                                                           | Federal Budget Institution of Science, State Research Center for Applied Microbiology & Biotechnology                                    | Federal Budget Institution of Science, State Research Center for Applied Microbiology & Biotechnology                                                                | Abaimova A; Bakhteeva I; Blagodatikh S; Bogun A; Borzilov A; Chekan L; Chernysh S; Denisenko E; Dentovskaya S; Detushev K; Detusheva E; Dyatlov I; Firstova V; Frolov V; Fursov M; Fursova N; Galkina E; Gapelchenkova T; Goncharova J; Gorbatov A; Hlyntseva A; Ivanov S; Kalmantayev T; Kalmantayeva O; Kanashenko M; Kartsev N; Kartseva A; Khomyakov A; Khramov M; Kislichkina A; Kolchanova A; Koroleva-Ushakova A; Kosilova I; Krasilnikova E; Kuzin V; Kuzina E; Makarova M; Marin M; Novikova T; Platonov M; Podkopaev Y; Ryabko A; Shaikhutdinova R; Shemyakin I; Shishkina L; Silkina M; Sizova A; Skryabin Y; Slukin P; Slukina N; Solomentsev V; Solovieva A; Teymurazov M; Timofeev V; Titareva G; Trunyakova A; Tyurin E; Vagayskaya A; Zeninskaya N; Zhumakaev R |                                                                                                                                                                                                                   |  |  |  |
| EPI_ISL_470882, EPI_ISL_500776 to 500778, EPI_ISL_590883 to 590884, EPI_ISL_590899, EPI_ISL_590981, EPI_ISL_590985, EPI_ISL_591008, EPI_ISL_635063 to 635065, EPI_ISL_635098, EPI_ISL_635127, EPI_ISL_635167, EPI_ISL_635170, EPI_ISL_635173, EPI_ISL_635176 to 635177, EPI_ISL_708073 to 708078, EPI_ISL_708176 to 708179, EPI_ISL_738313, EPI_ISL_775323 to 775326, EPI_ISL_775333, EPI_ISL_775362 to 775370                                                                                                                                                                                                                                                                                                                                                                                                                                                                                                                                                                                                                                                                                                                                                                                                                                     |                                                                                                                                          |                                                                                                                                                                      |                                                                                                                                                                                                                                                                                                                                                                                                                                                                                                                                                                                                                                                                                                                                                                                 |                                                                                                                                                                                                                   |  |  |  |
| see above                                                                                                                                                                                                                                                                                                                                                                                                                                                                                                                                                                                                                                                                                                                                                                                                                                                                                                                                                                                                                                                                                                                                                                                                                                          | Foerde Hospital, Department of Microbiology                                                                                              | Norwegian Institute of Public Health, Department of Virology                                                                                                         | Atiya R Ali; Hilde Elshaug; Hilde Vollen; Kamilla Heddeland Instefjord; Karoline Bragstad; Kathrine Stene-Johansen; Marie Paulsen Madsen; Olav Hungnes; Rasmus Riis Kopperud                                                                                                                                                                                                                                                                                                                                                                                                                                                                                                                                                                                                    |                                                                                                                                                                                                                   |  |  |  |
| EPI_ISL_455903, EPI_ISL_475152, EPI_ISL_476139                                                                                                                                                                                                                                                                                                                                                                                                                                                                                                                                                                                                                                                                                                                                                                                                                                                                                                                                                                                                                                                                                                                                                                                                     | Folkhälsomyndigheten                                                                                                                     | The Public Health Agency of Sweden                                                                                                                                   | Anna Risberg; Anna-Malin Linde; Karin Tegmark-Wisell; Maria Lind Karlberg; Mattias Haukland; Olov Svartstrom; Oskar Karlsson Lindsjö; Petra Edquist; Reza Advani; Sandra Broddesson; Shamam Muradrasoli                                                                                                                                                                                                                                                                                                                                                                                                                                                                                                                                                                         |                                                                                                                                                                                                                   |  |  |  |
| EPI_ISL_434650, EPI_ISL_475536, EPI_ISL_475541                                                                                                                                                                                                                                                                                                                                                                                                                                                                                                                                                                                                                                                                                                                                                                                                                                                                                                                                                                                                                                                                                                                                                                                                     | Follingse Halsocentral                                                                                                                   | The Public Health Agency of Sweden                                                                                                                                   | Anna Risberg; Anna-Malin Linde; Karin Tegmark-Wisell; Kerstin Persson Moberg; Maria Lind Karlberg; Mattias Haukland; Mia Brytting; Olov Svartstrom; Oskar Karlsson Lindsjö; Reza Advani; Sandra Broddesson; Theresa Enkirch                                                                                                                                                                                                                                                                                                                                                                                                                                                                                                                                                     |                                                                                                                                                                                                                   |  |  |  |
| EPI_ISL_420145                                                                                                                                                                                                                                                                                                                                                                                                                                                                                                                                                                                                                                                                                                                                                                                                                                                                                                                                                                                                                                                                                                                                                                                                                                     | Forde Hospital Department of Microbiology                                                                                                | Norwegian Institute of Public Health, Department of Virology                                                                                                         | Hilde Elshaug; Kamilla Heddeland Instefjord; Karoline Bragstad; Kathrine Stene-Johansen; Olav Hungnes                                                                                                                                                                                                                                                                                                                                                                                                                                                                                                                                                                                                                                                                           |                                                                                                                                                                                                                   |  |  |  |
| EPI_ISL_413586 to 413587                                                                                                                                                                                                                                                                                                                                                                                                                                                                                                                                                                                                                                                                                                                                                                                                                                                                                                                                                                                                                                                                                                                                                                                                                           | Foundation Elisabeth-Tweesteden Ziekenhuis                                                                                               | Erasmus Medical Center                                                                                                                                               | Anna van der Linden; Anнемiek van der Eijk; Aura Timen; Bas Oude Munnink; Claudia Schapendonk; Corien Swaan; Corine GeurtsvanKessel; David Nieuwenhuijse; Irina Chestakova; Jeroen van Kampen; Jolanda Voermans; Madelief Mollers; Manon Haverkate; Marion Koopmans; Mark Pronk; Mart Stein; Pascal Lexmond; Reina Sikkema; Richard Molenkamp; Sandra Kengne Kamga Mobou; on behalf of the Dutch national COVID-19 response team.                                                                                                                                                                                                                                                                                                                                               |                                                                                                                                                                                                                   |  |  |  |
| EPI_ISL_413565                                                                                                                                                                                                                                                                                                                                                                                                                                                                                                                                                                                                                                                                                                                                                                                                                                                                                                                                                                                                                                                                                                                                                                                                                                     | Foundation Pamn                                                                                                                          | Erasmus Medical Center                                                                                                                                               | Anna van der Linden; Anнемiek van der Eijk; Aura Timen; Bas Oude Munnink; Claudia Schapendonk; Corien Swaan; Corine GeurtsvanKessel; David Nieuwenhuijse; Irina Chestakova; Jeroen van Kampen; Jolanda Voermans; Madelief Mollers; Manon Haverkate; Marion Koopmans; Mark Pronk; Mart Stein; Pascal Lexmond; Reina Sikkema; Richard Molenkamp; Sandra Kengne Kamga Mobou; on behalf of the Dutch national COVID-19 response team.                                                                                                                                                                                                                                                                                                                                               |                                                                                                                                                                                                                   |  |  |  |
| EPI_ISL_419235 to 419237                                                                                                                                                                                                                                                                                                                                                                                                                                                                                                                                                                                                                                                                                                                                                                                                                                                                                                                                                                                                                                                                                                                                                                                                                           | Fundacion Jimenez Diaz                                                                                                                   | Instituto de Salud Carlos III                                                                                                                                        | Camarero, S.; Casas, I.; Cuesta, I.; Fernández, R.; González-Esguevillas, M.; Iglesias-Caballero, M.; Jiménez, M.; Jiménez, P.; Juliá, M.; Molinero Calamita, M.; Monzón, S.; Pozo, F.; Varona, S.; Zaballos, A.                                                                                                                                                                                                                                                                                                                                                                                                                                                                                                                                                                |                                                                                                                                                                                                                   |  |  |  |
| EPI_ISL_462447 to 462449                                                                                                                                                                                                                                                                                                                                                                                                                                                                                                                                                                                                                                                                                                                                                                                                                                                                                                                                                                                                                                                                                                                                                                                                                           | Fundació Lluïta contra la SIDA (FLSida)/Hospital Universitari Germans Trias i Pujol                                                      | IrsiCaixa AIDS Research Lab                                                                                                                                          | Bonaventura Clotet; Joaquim Segalés; Jorge Carrillo; Julia Blanco; Lidia Ruiz; Marc Corbacho; Marc Noguera-Julian; Maria Pilar Armengol; Maria Ubals; Mariona Parera; Nuria Izquierdo; Oriol Mitjà; Roger Paredes                                                                                                                                                                                                                                                                                                                                                                                                                                                                                                                                                               |                                                                                                                                                                                                                   |  |  |  |
| EPI_ISL_462478                                                                                                                                                                                                                                                                                                                                                                                                                                                                                                                                                                                                                                                                                                                                                                                                                                                                                                                                                                                                                                                                                                                                                                                                                                     | Fundación Jiménez Díaz                                                                                                                   | Instituto de Salud Carlos III                                                                                                                                        | A. Monzón; F. Casas; I. J. Jiménez; Iglesias-Caballero; M. Camarero; M. Cuesta; M. González-Esguevillas; M. Molinero Calamita; M. Zaballos; P. Jiménez; R. Fernández; S. Juliá; S. Pozo; S. Varona                                                                                                                                                                                                                                                                                                                                                                                                                                                                                                                                                                              |                                                                                                                                                                                                                   |  |  |  |

|                                                                                                                                                                                                                                                                                                                                                                                                                                                                                                                                                                                                                                                                                                                                                                                                                                                                                                                                                                                                                                                                      |                                                                                                                                                           |                                                                                                                         |                                                                                                                                                                                                                                                                                                                                                             |
|----------------------------------------------------------------------------------------------------------------------------------------------------------------------------------------------------------------------------------------------------------------------------------------------------------------------------------------------------------------------------------------------------------------------------------------------------------------------------------------------------------------------------------------------------------------------------------------------------------------------------------------------------------------------------------------------------------------------------------------------------------------------------------------------------------------------------------------------------------------------------------------------------------------------------------------------------------------------------------------------------------------------------------------------------------------------|-----------------------------------------------------------------------------------------------------------------------------------------------------------|-------------------------------------------------------------------------------------------------------------------------|-------------------------------------------------------------------------------------------------------------------------------------------------------------------------------------------------------------------------------------------------------------------------------------------------------------------------------------------------------------|
| EPI_ISL_420141, EPI_ISL_420146, EPI_ISL_420313, EPI_ISL_449787, EPI_ISL_493356 to 493380, EPI_ISL_500768 to 500774, EPI_ISL_500784 to 500790, EPI_ISL_549027 to 549028, EPI_ISL_549038, EPI_ISL_549048 to 549049, EPI_ISL_549056 to 549058, EPI_ISL_549060 to 549069, EPI_ISL_549071 to 549080, EPI_ISL_549082, EPI_ISL_549088, EPI_ISL_549112, EPI_ISL_549119 to 549122, EPI_ISL_549124, EPI_ISL_549132, EPI_ISL_549143, EPI_ISL_549154, EPI_ISL_549165, EPI_ISL_549168, EPI_ISL_590881, EPI_ISL_590898, EPI_ISL_590901 to 590903, EPI_ISL_590912, EPI_ISL_635086 to 635087, EPI_ISL_668396 to 668397, EPI_ISL_668403, EPI_ISL_708035, EPI_ISL_708059, EPI_ISL_708126 to 708130, EPI_ISL_759973 to 759974, EPI_ISL_759984 to 759985, EPI_ISL_775271, EPI_ISL_775273 to 775274, EPI_ISL_775279, EPI_ISL_775294, EPI_ISL_775299 to 775300, EPI_ISL_775303 to 775304, EPI_ISL_775427, EPI_ISL_775484, EPI_ISL_775488 to 775490, EPI_ISL_775496 to 775497, EPI_ISL_775524 to 775527, EPI_ISL_796722 to 796724, EPI_ISL_796726, EPI_ISL_796730 to 796732, EPI_ISL_860213 |                                                                                                                                                           |                                                                                                                         |                                                                                                                                                                                                                                                                                                                                                             |
| see above                                                                                                                                                                                                                                                                                                                                                                                                                                                                                                                                                                                                                                                                                                                                                                                                                                                                                                                                                                                                                                                            | Furst Medical Laboratory                                                                                                                                  | Norwegian Institute of Public Health, Department of Virology                                                            | Atiya R Ali; Hilde Elshaug; Hilde Synnøve Vollen; Hilde Vollen; Kamilla Heddeland Instefjord; Karoline Bragstad; Kathrine Stene-Johansen; Marie Paulsen Madsen; Olav Hungnes; Rasmus Riis Kopperud                                                                                                                                                          |
| EPI_ISL_522549 to 522550                                                                                                                                                                                                                                                                                                                                                                                                                                                                                                                                                                                                                                                                                                                                                                                                                                                                                                                                                                                                                                             | Félix Guyon Hospital                                                                                                                                      | UMR PIMIT Université de La Réunion                                                                                      | Camille Lebarbenchon; David Wilkinson; Patrick Mavingui                                                                                                                                                                                                                                                                                                     |
| EPI_ISL_418416, EPI_ISL_508878, EPI_ISL_509003 to 509004                                                                                                                                                                                                                                                                                                                                                                                                                                                                                                                                                                                                                                                                                                                                                                                                                                                                                                                                                                                                             | GH Les Portes du Sud                                                                                                                                      | CNR Virus des Infections Respiratoires - France SUD                                                                     | Alexandre Gaymard; Antonin Bal; Bruno Lina; Carine Moustaud; Florence Morfin-Sherpa; Gregory Destras; Gwendolynne Burfin; Laurence Josset; Martine Valette; Maude Bouscambert-Duchamp; Raphaëlle Lamy; Solenne Brun                                                                                                                                         |
| EPI_ISL_428351 to 428352, EPI_ISL_428363                                                                                                                                                                                                                                                                                                                                                                                                                                                                                                                                                                                                                                                                                                                                                                                                                                                                                                                                                                                                                             | GH Nord Essonne Service de Biologie clinique                                                                                                              | National Reference Center for Viruses of Respiratory Infections, Institut Pasteur, Paris                                | Angela Brisebarre; Etienne Simon-Lorière; Flora Donati; Marion Barbet; Maud Vanpeene; Mélanie Albert; Méline Bizard; Sylvie Behillili; Sylvie van der Werf; Vincent Enouf                                                                                                                                                                                   |
| EPI_ISL_825054                                                                                                                                                                                                                                                                                                                                                                                                                                                                                                                                                                                                                                                                                                                                                                                                                                                                                                                                                                                                                                                       | GMERS Medical College and Hospital, Gotri, Vadodara                                                                                                       | Gujarat Biotechnology Research Centre                                                                                   | Atfal Ansari; Apurvashin Puvar; Bithika Duttaroy; Chaitanya Joshi; Dinesh Kumar; Janvi Raval; Kalpesh Mistry; Madhvi Joshi; Mitesh Kamoth; Nikha Trivedi; Nitin Savaliya; Ramesh Pandit; Zarna Patel; Zuber Saiyed                                                                                                                                          |
| EPI_ISL_534249 to 534251                                                                                                                                                                                                                                                                                                                                                                                                                                                                                                                                                                                                                                                                                                                                                                                                                                                                                                                                                                                                                                             | Gavle Sjukhus                                                                                                                                             | The Public Health Agency of Sweden                                                                                      | Anna Risberg; Anna-Malin Linde; Karin Tegmark-Wisell; Maria Lind Karlberg; Mattias Haukland; Mia Brytting; Olov Svartstrom; Oskar Karlsson Lindsjo; Petra Edquist; Reza Advani; Sandra Broddesson                                                                                                                                                           |
| EPI_ISL_475110, EPI_ISL_475115, EPI_ISL_582801, EPI_ISL_582809, EPI_ISL_582834, EPI_ISL_615101 to 615103, EPI_ISL_623095, EPI_ISL_648140 to 648142, EPI_ISL_648144, EPI_ISL_648163, EPI_ISL_661283, EPI_ISL_661286 to 661287, EPI_ISL_710608 to 710609, EPI_ISL_831977 to 831978                                                                                                                                                                                                                                                                                                                                                                                                                                                                                                                                                                                                                                                                                                                                                                                     |                                                                                                                                                           |                                                                                                                         |                                                                                                                                                                                                                                                                                                                                                             |
| see above                                                                                                                                                                                                                                                                                                                                                                                                                                                                                                                                                                                                                                                                                                                                                                                                                                                                                                                                                                                                                                                            | Gavle klinisk mikrobiologi                                                                                                                                | The Public Health Agency of Sweden                                                                                      | Anna Risberg; Anna-Malin Linde; Department of Microbiology; Karin Tegmark-Wisell; Maria Lind Karlberg; Mattias Haukland; Mia Brytting; Olov Svartstrom; Oskar Karlsson Lindsjo; Petra Edquist; Reza Advani; Sandra Broddesson; Shamam Muradrasoli; The Public Health Agency of Sweden                                                                       |
| EPI_ISL_676514                                                                                                                                                                                                                                                                                                                                                                                                                                                                                                                                                                                                                                                                                                                                                                                                                                                                                                                                                                                                                                                       | Gavleborg                                                                                                                                                 | The Public Health Agency of Sweden                                                                                      | Department of Microbiology; The Public Health Agency of Sweden                                                                                                                                                                                                                                                                                              |
| EPI_ISL_730567 to 730568, EPI_ISL_730570 to 730577, EPI_ISL_730620                                                                                                                                                                                                                                                                                                                                                                                                                                                                                                                                                                                                                                                                                                                                                                                                                                                                                                                                                                                                   | Gazi University Faculty of Medicine, Medical Virology Laboratory                                                                                          | Gazi University Faculty of Medicine, Medical Virology Laboratory                                                        | Erdem ahin; Gülenam Bozday; Hager Muthah; Il Fidan; Kayhan Çalar; Murat Dizbay; Selin Yiti; Shaknoza Sarzhanova; Özlem Güzel Tunçcan                                                                                                                                                                                                                        |
| EPI_ISL_467300                                                                                                                                                                                                                                                                                                                                                                                                                                                                                                                                                                                                                                                                                                                                                                                                                                                                                                                                                                                                                                                       | General Hospital "Abdulah Nakas"                                                                                                                          | Alea Genetic Center                                                                                                     | Damir Marjanovic; Dino Pecar; Enis Kandic; Lana Salihfendic; Nihad Fejzic; Rijad Konjodzic; Sead Jazic; Teufik Goletic                                                                                                                                                                                                                                      |
| EPI_ISL_516413, EPI_ISL_677705, EPI_ISL_677707, EPI_ISL_678252                                                                                                                                                                                                                                                                                                                                                                                                                                                                                                                                                                                                                                                                                                                                                                                                                                                                                                                                                                                                       | General Hospital - Kumanovo                                                                                                                               | Research Center for Genetic Engineering and Biotechnology "Georgi D. Efremov" , Macedonian Academy of Sciences and Arts | RCGEB - MASA                                                                                                                                                                                                                                                                                                                                                |
| EPI_ISL_677704, EPI_ISL_677709, EPI_ISL_677711, EPI_ISL_677722, EPI_ISL_677725 to 677726, EPI_ISL_678255 to 678256                                                                                                                                                                                                                                                                                                                                                                                                                                                                                                                                                                                                                                                                                                                                                                                                                                                                                                                                                   | General Hospital - Ohrid                                                                                                                                  | Research Center for Genetic Engineering and Biotechnology "Georgi D. Efremov" , Macedonian Academy of Sciences and Arts | RCGEB - MASA                                                                                                                                                                                                                                                                                                                                                |
| EPI_ISL_514354, EPI_ISL_677674, EPI_ISL_677703, EPI_ISL_677712 to 677714, EPI_ISL_678258                                                                                                                                                                                                                                                                                                                                                                                                                                                                                                                                                                                                                                                                                                                                                                                                                                                                                                                                                                             | General Hospital - Prilep                                                                                                                                 | Research Center for Genetic Engineering and Biotechnology "Georgi D. Efremov" , Macedonian Academy of Sciences and Arts | RCGEB - MASA                                                                                                                                                                                                                                                                                                                                                |
| EPI_ISL_677719, EPI_ISL_678260                                                                                                                                                                                                                                                                                                                                                                                                                                                                                                                                                                                                                                                                                                                                                                                                                                                                                                                                                                                                                                       | General Hospital - Struga                                                                                                                                 | Research Center for Genetic Engineering and Biotechnology "Georgi D. Efremov" , Macedonian Academy of Sciences and Arts | RCGEB - MASA                                                                                                                                                                                                                                                                                                                                                |
| EPI_ISL_678254                                                                                                                                                                                                                                                                                                                                                                                                                                                                                                                                                                                                                                                                                                                                                                                                                                                                                                                                                                                                                                                       | General Hospital - Strumica                                                                                                                               | Research Center for Genetic Engineering and Biotechnology "Georgi D. Efremov" , Macedonian Academy of Sciences and Arts | RCGEB - MASA                                                                                                                                                                                                                                                                                                                                                |
| EPI_ISL_677675, EPI_ISL_677710                                                                                                                                                                                                                                                                                                                                                                                                                                                                                                                                                                                                                                                                                                                                                                                                                                                                                                                                                                                                                                       | General Hospital - Veles                                                                                                                                  | Research Center for Genetic Engineering and Biotechnology "Georgi D. Efremov" , Macedonian Academy of Sciences and Arts | RCGEB - MASA                                                                                                                                                                                                                                                                                                                                                |
| EPI_ISL_430846                                                                                                                                                                                                                                                                                                                                                                                                                                                                                                                                                                                                                                                                                                                                                                                                                                                                                                                                                                                                                                                       | General Intensive Care Unit, Raymond Poincaré Hospital (AP-HP), Lab Inflammation & Infection, U1173 University Paris Saclay-UVSQ/INSERM, Garches, France. | Institut Pasteur, Laboratory for Urgent Response to biological Threats                                                  | Annane Djillali; Caro Valérie; Manuguerra Jean-Claude; Vanhomwegen Jessica                                                                                                                                                                                                                                                                                  |
| EPI_ISL_614282 to 614293, EPI_ISL_623096 to 623097, EPI_ISL_623103, EPI_ISL_680324 to 680325, EPI_ISL_693766 to 693774, EPI_ISL_792042 to 792053                                                                                                                                                                                                                                                                                                                                                                                                                                                                                                                                                                                                                                                                                                                                                                                                                                                                                                                     | General practitioner                                                                                                                                      | National Reference Center for Viruses of Respiratory Infections, Institut Pasteur, Paris                                | ; Angela Brisebarre; Brieuc Leflaure; Camille Capel; Etienne Simon-Lorière; Marion Barbet; Maud Vanpeene; Méline Bizard; Sylvie Behillili; Sylvie van der Werf; Vincent Enouf                                                                                                                                                                               |
| EPI_ISL_427391, EPI_ISL_428346, EPI_ISL_428368, EPI_ISL_480228 to 480292, EPI_ISL_735259 to 735279, EPI_ISL_735281 to 735373, EPI_ISL_735434 to 735435, EPI_ISL_833141 to 833146                                                                                                                                                                                                                                                                                                                                                                                                                                                                                                                                                                                                                                                                                                                                                                                                                                                                                     |                                                                                                                                                           |                                                                                                                         |                                                                                                                                                                                                                                                                                                                                                             |
| see above                                                                                                                                                                                                                                                                                                                                                                                                                                                                                                                                                                                                                                                                                                                                                                                                                                                                                                                                                                                                                                                            | Genomic Laboratory (GLAB) (Conjoint lab of Health Directorate of Istanbul and Istanbul Technical University)                                              | Genomic Laboratory (GLAB), Istanbul Technical University                                                                | Arzu Invern; Ayse Serra Ozel; Betsi Kose; Betsi Köse; Bugra Agaoglu; Elifnaz Çelik; Gizem Alkurt; Gizem Dinler Doganay; Ilker Karacan; Jale Yildiz; Levent Doganay; Mehtap Aydin; Mehtap Aydin; Nihat Bugra Agaoglu; Nilsun Altunal; Nisan Denizce Can; Ozlem Akgun Dogan; Pari Sharifi; Payam Zolfagharian; Tugba Kizilboga Akgun; Yasemin Kendir Demirkol |
| EPI_ISL_882921                                                                                                                                                                                                                                                                                                                                                                                                                                                                                                                                                                                                                                                                                                                                                                                                                                                                                                                                                                                                                                                       | Genomic Medicine Laboratory, IRCCS Santa Lucia Foundation                                                                                                 | INMI Lazzaro Spallanzani IRCCS                                                                                          | A Di Caro; B Bartolini; C.E.M Gruber; E Giardina; E Giombini; F Messina; M Rueca; MR Capobianchi; O Butera                                                                                                                                                                                                                                                  |
| EPI_ISL_803899                                                                                                                                                                                                                                                                                                                                                                                                                                                                                                                                                                                                                                                                                                                                                                                                                                                                                                                                                                                                                                                       | Genomic Medicine Laboratory, IRCCS Santa Lucia Foundation                                                                                                 | National Institute for Infectious Diseases, INMI, "L. Spallanzani" IRCCS                                                | A Di Caro; B Bartolini; C.E.M Gruber; E Giardina; E Giombini; F Messina; M. Rueca; MR Capobianchi; O Butera                                                                                                                                                                                                                                                 |
| EPI_ISL_436715 to 436717                                                                                                                                                                                                                                                                                                                                                                                                                                                                                                                                                                                                                                                                                                                                                                                                                                                                                                                                                                                                                                             | Genomics and Computational Biology Lab, Scientific Research Institute of Physical-Chemical Medicine, FMBA of Russia                                       | Genomics and Computational Biology Lab, Scientific Research Institute of Physical-Chemical Medicine, FMBA of Russia     | A. Manolov; A. Pavlenko; D. Fedorov; K. Klimina; O. Guskova; V. Govorun and E. Ilina; V. Veselovsky                                                                                                                                                                                                                                                         |
| EPI_ISL_539524, EPI_ISL_862556, EPI_ISL_862564 to 862565, EPI_ISL_862567, EPI_ISL_862640                                                                                                                                                                                                                                                                                                                                                                                                                                                                                                                                                                                                                                                                                                                                                                                                                                                                                                                                                                             | Gerencia de Asistencia Sanitaria de Soria                                                                                                                 | Instituto de Salud Carlos III                                                                                           | A. Monzón; C. Aldea; F. Casas; I; I. Aldea, C.; I. Jiménez; Iglesias-Caballero; M. Pozo; M. Camarero; M. Cuesta; M. González-Esguevillas; M. Molinero Calamita; M. Zaballos; M.Camarero; P. Jiménez; S. Juliá; S. Molinero Calamita; S. Pozo; S. Varona                                                                                                     |
| EPI_ISL_539557                                                                                                                                                                                                                                                                                                                                                                                                                                                                                                                                                                                                                                                                                                                                                                                                                                                                                                                                                                                                                                                       | Gerencia del área de salud de Badajoz, Llerena y Zafra                                                                                                    | Instituto de Salud Carlos III                                                                                           | A. Monzón; C. Pazos; F. Casas; I; I. Jiménez; Iglesias-Caballero; M. Camarero; M. Cuesta; M. González-Esguevillas; M. Molinero Calamita; M. Zaballos; P. Jiménez; S. Juliá; S. Pozo; S. Varona                                                                                                                                                              |
| EPI_ISL_833260 to 833261                                                                                                                                                                                                                                                                                                                                                                                                                                                                                                                                                                                                                                                                                                                                                                                                                                                                                                                                                                                                                                             | Giulianova                                                                                                                                                | Istituto Zooprofilattico Sperimentale dell'Abruzzo e Molise "G. Caporale"                                               | Ancora M; Calistri P; Cammà C; Curini V; Di Domenico M; Di Pasquale A; Lorusso A; Mangone I; Marcacci M; Puglia I; Rinaldi A; Savini G                                                                                                                                                                                                                      |
| EPI_ISL_447608 to 447613, EPI_ISL_452219 to 452222                                                                                                                                                                                                                                                                                                                                                                                                                                                                                                                                                                                                                                                                                                                                                                                                                                                                                                                                                                                                                   | Goethe University Hospital Frankfurt                                                                                                                      | Institute for Medical Virology, Goethe University Hospital Frankfurt                                                    | Annemarie Berger; Björn Rotter; Denisa Bojkova; Jindrich Cinat; Klaus Hoffmeier; Sandra Westhaus; Sandra Ciesek; Sebastian Hoehl; Tuna Toptan; and Marek Widera                                                                                                                                                                                             |
| EPI_ISL_529146                                                                                                                                                                                                                                                                                                                                                                                                                                                                                                                                                                                                                                                                                                                                                                                                                                                                                                                                                                                                                                                       | Goethe University Hospital Frankfurt, Institute for Medical Virology                                                                                      | Goethe University Hospital Frankfurt, Institute for Medical Virology                                                    | Berger, A.; Bojkova, D.; Ciesek, S.; Cinat, J.; Grabmair; Hoehl, S.; Hoffmeier, K.; Rotter, B.; T.T.; Westhaus, S.; Widera, M.                                                                                                                                                                                                                              |
| EPI_ISL_415152                                                                                                                                                                                                                                                                                                                                                                                                                                                                                                                                                                                                                                                                                                                                                                                                                                                                                                                                                                                                                                                       | Gorgas Memorial Institute for Health Studies                                                                                                              | Gorgas Memorial Institute for Health Studies                                                                            | Alexander A. Martinez.; Ambar Moreno; Claudia Gonzalez; Danilo Franco; Elimelec Valdespino; Juan M. Pascale; Leyda Abrego; Oris Chavarria; Sandra Lopez-Verges; Yamilka Diaz                                                                                                                                                                                |
| EPI_ISL_794818 to 794820                                                                                                                                                                                                                                                                                                                                                                                                                                                                                                                                                                                                                                                                                                                                                                                                                                                                                                                                                                                                                                             | Greek Genome Center, Biomedical Research Foundation of                                                                                                    | Greek Genome Center, Biomedical Research Foundation of                                                                  | Christina Maria Kravvari; Dimitrios Thanos; Emmanouil Athanasiadis; Ioannis Vatsellas; Katerina Zoi; Theodoris Loupis                                                                                                                                                                                                                                       |

|                                                                                                                                                                                                                                                                                                                                                                                                                                                                                                                    |                                                                                                                                      |                                                                                                                                      |                                                                                                                                                                                                                                                                             |
|--------------------------------------------------------------------------------------------------------------------------------------------------------------------------------------------------------------------------------------------------------------------------------------------------------------------------------------------------------------------------------------------------------------------------------------------------------------------------------------------------------------------|--------------------------------------------------------------------------------------------------------------------------------------|--------------------------------------------------------------------------------------------------------------------------------------|-----------------------------------------------------------------------------------------------------------------------------------------------------------------------------------------------------------------------------------------------------------------------------|
| EPI_ISL_421454, EPI_ISL_421458, EPI_ISL_421481, EPI_ISL_421487, EPI_ISL_421491                                                                                                                                                                                                                                                                                                                                                                                                                                     | the Academy of Athens (BRFAA)<br>H Beatriz Angelo                                                                                    | the Academy of Athens (BRFAA)<br>Instituto Nacional de Saude (INSA)                                                                  | Guiomar et al                                                                                                                                                                                                                                                               |
| EPI_ISL_418003, EPI_ISL_418007 to 418008, EPI_ISL_418019 to 418022                                                                                                                                                                                                                                                                                                                                                                                                                                                 | H Braga                                                                                                                              | Instituto Nacional de Saude (INSA)                                                                                                   | Guiomar et al                                                                                                                                                                                                                                                               |
| EPI_ISL_421457                                                                                                                                                                                                                                                                                                                                                                                                                                                                                                     | H Dr Nelio Mendonca - Funchal                                                                                                        | Instituto Nacional de Saude (INSA)                                                                                                   | Guiomar et al                                                                                                                                                                                                                                                               |
| EPI_ISL_418026, EPI_ISL_421449, EPI_ISL_421459 to 421461                                                                                                                                                                                                                                                                                                                                                                                                                                                           | H Dr. Nelio Mendonca - Funchal                                                                                                       | Instituto Nacional de Saude (INSA)                                                                                                   | Guiomar et al                                                                                                                                                                                                                                                               |
| EPI_ISL_418023, EPI_ISL_421466 to 421467                                                                                                                                                                                                                                                                                                                                                                                                                                                                           | H Evora                                                                                                                              | Instituto Nacional de Saude (INSA)                                                                                                   | Guiomar et al                                                                                                                                                                                                                                                               |
| EPI_ISL_418018                                                                                                                                                                                                                                                                                                                                                                                                                                                                                                     | H Garcia de Orta                                                                                                                     | Instituto Nacional de Saude (INSA)                                                                                                   | Guiomar et al                                                                                                                                                                                                                                                               |
| EPI_ISL_421446 to 421448                                                                                                                                                                                                                                                                                                                                                                                                                                                                                           | H Guimaraes                                                                                                                          | Instituto Nacional de Saude (INSA)                                                                                                   | Guiomar et al                                                                                                                                                                                                                                                               |
| EPI_ISL_418025, EPI_ISL_421462, EPI_ISL_421468 to 421471, EPI_ISL_421488, EPI_ISL_421490, EPI_ISL_421492, EPI_ISL_421495                                                                                                                                                                                                                                                                                                                                                                                           |                                                                                                                                      |                                                                                                                                      |                                                                                                                                                                                                                                                                             |
| see above                                                                                                                                                                                                                                                                                                                                                                                                                                                                                                          | H Santarem                                                                                                                           | Instituto Nacional de Saude (INSA)                                                                                                   | Guiomar et al                                                                                                                                                                                                                                                               |
| EPI_ISL_596250 to 596263, EPI_ISL_596268 to 596317, EPI_ISL_596357 to 596377                                                                                                                                                                                                                                                                                                                                                                                                                                       | HELIX LCC                                                                                                                            | WHO National Influenza Centre Russian Federation                                                                                     | Andrey Komissarov; Anna Ivanova; Artem Fadeev; Daria Danilenko; Dmitry Bazhenov; Kseniya Komissarova                                                                                                                                                                        |
| EPI_ISL_602329 to 602411, EPI_ISL_602417 to 602461, EPI_ISL_639948 to 639973, EPI_ISL_733023 to 733051, EPI_ISL_733053 to 733153, EPI_ISL_733301 to 733391, EPI_ISL_733393, EPI_ISL_733396 to 733401, EPI_ISL_733417 to 733458, EPI_ISL_872985 to 873026, EPI_ISL_873034                                                                                                                                                                                                                                           |                                                                                                                                      |                                                                                                                                      |                                                                                                                                                                                                                                                                             |
| see above                                                                                                                                                                                                                                                                                                                                                                                                                                                                                                          | HELIX LLC                                                                                                                            | WHO National Influenza Centre Russian Federation                                                                                     | Andrey Komissarov; Anna Ivanova; Artem Fadeev; Daria Danilenko; Dmitry Bazhenov; Dmitry Lioznov; Elena Nabieva; Georgii Bazykin; Ksenia Safina; Kseniya Komissarova; Mikhail Bakaev                                                                                         |
| EPI_ISL_860899                                                                                                                                                                                                                                                                                                                                                                                                                                                                                                     | HOPITAL PAUL BROUSSE - Service Microbiologie                                                                                         | National Reference Center for Viruses of Respiratory Infections, Institut Pasteur, Paris                                             | Angela Brisebarre; Camille Capel; Etienne Simon-Lorière; Marion Barbet; Maud Vanpeene; Méline Bizard; Roque-Afonso Anne-Marie; Sylvie Behillil; Sylvie van der Werf; Vincent Enouf                                                                                          |
| EPI_ISL_419238                                                                                                                                                                                                                                                                                                                                                                                                                                                                                                     | HOSPITAL DE CRUCES.                                                                                                                  | Instituto de Salud Carlos III                                                                                                        | A. Monzón; F. Casas; I. Aranzamendi, M.; I. Jiménez; Iglesias-Caballero; M. Camarero; M. Cuesta; M. González-Esguevillas; M. Molinero Calamita; M. Zaballos; P. Jiménez; S. Juliá; S. Pozo; S. Varona                                                                       |
| EPI_ISL_418247                                                                                                                                                                                                                                                                                                                                                                                                                                                                                                     | HOSPITAL GENERAL DE SEGOVIA                                                                                                          | Instituto de Salud Carlos III                                                                                                        | A. Monzón; F. Casas; I. Hernando-Real S.; I. Jiménez; Iglesias-Caballero; M. Camarero; M. Cuesta; M. González-Esguevillas; M. Molinero Calamita; M. Zaballos; P. Jiménez; S. Juliá; S. Pozo; S. Varona                                                                      |
| EPI_ISL_417007                                                                                                                                                                                                                                                                                                                                                                                                                                                                                                     | HOSPITAL SANTA MARIA NAI                                                                                                             | Instituto de Salud Carlos III                                                                                                        | A. Monzón; I. García Costa, J.; Iglesias-Caballero; M. Camarero S. Pozo F. Casas I. Jiménez; M. Cuesta; M. González-Esguevillas; M. Molinero Calamita; M. Zaballos; P. Jiménez; S. Juliá; S. Pozo; S. Varona                                                                |
| EPI_ISL_418253, EPI_ISL_419240, EPI_ISL_419709                                                                                                                                                                                                                                                                                                                                                                                                                                                                     | HOSPITAL TXAGORRITXU                                                                                                                 | Instituto de Salud Carlos III                                                                                                        | A. Monzón; C; F. Casas; I. Gomez-Gonzalez C.; I. Gómez; I. Gómez, C.; I. Jiménez; Iglesias-Caballero; M. Camarero; M. Camarero S. Pozo F. Casas I. Jiménez; M. Cuesta; M. González-Esguevillas; M. Molinero Calamita; M. Zaballos; P. Jiménez; S. Juliá; S. Pozo; S. Varona |
| EPI_ISL_418251                                                                                                                                                                                                                                                                                                                                                                                                                                                                                                     | HOSPITAL UNIVERSITARIO LA PAZ                                                                                                        | Instituto de Salud Carlos III                                                                                                        | A. Monzón; F. Casas; I. Jiménez; I. Romero P.; Iglesias-Caballero; M. Camarero; M. Cuesta; M. González-Esguevillas; M. Molinero Calamita; M. Zaballos; P. Jiménez; S. Juliá; S. Pozo; S. Varona                                                                             |
| EPI_ISL_418243 to 418244                                                                                                                                                                                                                                                                                                                                                                                                                                                                                           | HOSPITAL UNIVERSITARIO VIRGEN DE LAS NIEVES                                                                                          | Instituto de Salud Carlos III                                                                                                        | A. Monzón; F. Casas; I. Jiménez; I. Sanbonmatsu S.; Iglesias-Caballero; M. Camarero; M. Cuesta; M. González-Esguevillas; M. Molinero Calamita; M. Zaballos; P. Jiménez; S. Juliá; S. Pozo; S. Varona                                                                        |
| EPI_ISL_430847                                                                                                                                                                                                                                                                                                                                                                                                                                                                                                     | HS mikrobiologi virus                                                                                                                | The Public Health Agency of Sweden                                                                                                   | Anna Risberg; Anna-Malin Linde; Karin Tegmark-Wisell; Maria Lind Karlberg; Olov Svartstrom; Oskar Karlsson Lindsjo; Shaman Muradrasoli; Zhibing Yun                                                                                                                         |
| EPI_ISL_418009, EPI_ISL_421463, EPI_ISL_421489, EPI_ISL_421493 to 421494                                                                                                                                                                                                                                                                                                                                                                                                                                           | HSE Ilha Terceira - Angra do Heroismo                                                                                                | Instituto Nacional de Saude (INSA)                                                                                                   | Guiomar et al                                                                                                                                                                                                                                                               |
| EPI_ISL_412971                                                                                                                                                                                                                                                                                                                                                                                                                                                                                                     | HUS Diagnostikkakeskus, Hallinto                                                                                                     | Department of Virology Faculty of Medicine, Medicum University of Helsinki                                                           | Hannimari Kallio-Kokko; Olli Vapalahti; Suvi Kuivanen; Teemu Smura                                                                                                                                                                                                          |
| EPI_ISL_648151                                                                                                                                                                                                                                                                                                                                                                                                                                                                                                     | Halmstad                                                                                                                             | The Public Health Agency of Sweden                                                                                                   | Anna Risberg; Anna-Malin Linde; Karin Tegmark-Wisell; Maria Lind Karlberg; Mattias Haukland; Mia Brytting; Olov Svartstrom; Oskar Karlsson Lindsjo; Petra Edquist; Reza Advani; Sandra Broddesson                                                                           |
| EPI_ISL_454436 to 454446, EPI_ISL_455902, EPI_ISL_469073 to 469074, EPI_ISL_475093 to 475094, EPI_ISL_475096 to 475098, EPI_ISL_475100, EPI_ISL_475114, EPI_ISL_475116 to 475117, EPI_ISL_475120 to 475121, EPI_ISL_475123, EPI_ISL_475125, EPI_ISL_475156 to 475159, EPI_ISL_475164, EPI_ISL_475548, EPI_ISL_475553, EPI_ISL_475556 to 475557, EPI_ISL_510831, EPI_ISL_510866, EPI_ISL_548247, EPI_ISL_548249, EPI_ISL_582803 to 582805, EPI_ISL_594148, EPI_ISL_615104 to 615107, EPI_ISL_623086, EPI_ISL_648148 |                                                                                                                                      |                                                                                                                                      |                                                                                                                                                                                                                                                                             |
| see above                                                                                                                                                                                                                                                                                                                                                                                                                                                                                                          | Halmstad klinisk mikrobiologi                                                                                                        | The Public Health Agency of Sweden                                                                                                   | Anna Risberg; Anna-Malin Linde; Karin Tegmark-Wisell; Maria Lind Karlberg; Mattias Haukland; Mia Brytting; Olov Svartstrom; Oskar Karlsson Lindsjo; Petra Edquist; Reza Advani; Sandra Broddesson; Shamam Muradrasoli; Shaman Muradrasoli                                   |
| EPI_ISL_710606 to 710607, EPI_ISL_766591                                                                                                                                                                                                                                                                                                                                                                                                                                                                           | Halsomedicinskt Center                                                                                                               | The Public Health Agency of Sweden                                                                                                   | Department of Microbiology; The Public Health Agency of Sweden                                                                                                                                                                                                              |
| EPI_ISL_766028                                                                                                                                                                                                                                                                                                                                                                                                                                                                                                     | Hannover Medical School, Institute of Virology                                                                                       | Hannover Medical School, Institute of Virology                                                                                       | Lars Steinbrück                                                                                                                                                                                                                                                             |
| EPI_ISL_635080 to 635084, EPI_ISL_635089 to 635091, EPI_ISL_635133, EPI_ISL_635184                                                                                                                                                                                                                                                                                                                                                                                                                                 | Haukeland University Hospital, Department of Medical Microbiology                                                                    | Norwegian Institute of Public Health, Department of Virology                                                                         | Hilde Elshaug; Hilde Vollan; Kamilla Heddeland Instefjord; Karoline Bragstad; Kathrine Stene-Johansen; Marie Paulsen Madsen; Olav Hungnes; Rasmus Riis Kopperud                                                                                                             |
| EPI_ISL_635128, EPI_ISL_668392, EPI_ISL_668405, EPI_ISL_759975, EPI_ISL_775276, EPI_ISL_775335 to 775336, EPI_ISL_775357, EPI_ISL_775407 to 775409, EPI_ISL_796652, EPI_ISL_860208, EPI_ISL_860211                                                                                                                                                                                                                                                                                                                 |                                                                                                                                      |                                                                                                                                      |                                                                                                                                                                                                                                                                             |
| see above                                                                                                                                                                                                                                                                                                                                                                                                                                                                                                          | Haukeland University Hospital, Dept. of Microbiology                                                                                 | Norwegian Institute of Public Health, Department of Virology                                                                         | Atiya R Ali; Hilde Elshaug; Hilde Vollan; Kamilla Heddeland Instefjord; Karoline Bragstad; Kathrine Stene-Johansen; Marie Paulsen Madsen; Olav Hungnes; Rasmus Riis Kopperud                                                                                                |
| EPI_ISL_450498                                                                                                                                                                                                                                                                                                                                                                                                                                                                                                     | Health Board Laboratory of Communicable Diseases                                                                                     | Charite Universitätsmedizin Berlin, Institute of Virology                                                                            | Barbara Muhlemann; Christian Drosten; Julia Schneider; Jörn Beheim-Schwarzbach; Liidia Dotsenko; Natalja Kuznetsova; Talitha Veith; Terry Jones; Victor M Corman                                                                                                            |
| EPI_ISL_420065 to 420066                                                                                                                                                                                                                                                                                                                                                                                                                                                                                           | Health Board Laboratory of Communicable Diseases                                                                                     | Charite Universitätsmedizin Berlin, Institute of Virology                                                                            | Barbara Muhlemann; Christian Drosten; Jorn Beheim-Schwarzbach; Julia Schneider; Liidia Dotsenko; Natalja Kuznetsova; Talitha Veith; Terry Jones; Victor M Corman                                                                                                            |
| EPI_ISL_429256                                                                                                                                                                                                                                                                                                                                                                                                                                                                                                     | Health Sciences Technology Park, Avicena, 8, 18016 Granada, Spain                                                                    | Sequencing and Bioinformatics Service FISABIO-Public Health                                                                          | Almudena Rojas; Joaquín Mendoza; Pablo Mendoza                                                                                                                                                                                                                              |
| EPI_ISL_451310 to 451311, EPI_ISL_487370, EPI_ISL_487377, EPI_ISL_487379, EPI_ISL_487381, EPI_ISL_501231 to 501238, EPI_ISL_501241 to 501242, EPI_ISL_501248 to 501251                                                                                                                                                                                                                                                                                                                                             |                                                                                                                                      |                                                                                                                                      |                                                                                                                                                                                                                                                                             |
| see above                                                                                                                                                                                                                                                                                                                                                                                                                                                                                                          | Hellenic Pasteur Institute, National Influenza Reference laboratory of Southern Greece & Unit of Bioinformatics and Applied Genomics | Hellenic Pasteur Institute, National Influenza Reference laboratory of Southern Greece & Unit of Bioinformatics and Applied Genomics | Andreas Mentis; Androniki Voulgari-Kokota; Antonios Kalliaropoulos; Aspasia Kontou; Athanasios Kossyvakis; Evangelidou Maria; Horefti Elina; Timokratis Karamitros; Vasiliki Pogka                                                                                          |
| EPI_ISL_501230                                                                                                                                                                                                                                                                                                                                                                                                                                                                                                     | Hellenic Pasteur Institute, Public Health Laboratories                                                                               | Hellenic Pasteur Institute, National Influenza Reference laboratory of Southern Greece & Unit of Bioinformatics and Applied Genomics | Andreas Mentis; Androniki Voulgari-Kokota; Antonios Kalliaropoulos; Aspasia Kontou; Athanasios Kossyvakis; Evangelidou Maria; Horefti Elina; Timokratis Karamitros; Vasiliki Pogka                                                                                          |
| EPI_ISL_430469                                                                                                                                                                                                                                                                                                                                                                                                                                                                                                     | Hellenic Pasteur Institute, Public Health Laboratories                                                                               | Hellenic Pasteur Institute, Public Health Laboratories, Unit of Bioinformatics and Applied Genomics                                  | Andreas Mentis; Androniki Voulgari-Kokota; Antonios Kalliaropoulos; Aspasia Kontou; Athanasios Kossyvakis; Evangelidou Maria; Horefti Elina; Timokratis Karamitros; Vasiliki Pogka                                                                                          |
| EPI_ISL_428232 to 428236                                                                                                                                                                                                                                                                                                                                                                                                                                                                                           | Hematology Laboratory, Section of Molecular Diagnostics, University Clinical Centre, Medical University of Gdansk                    | Department of Virology, Faculty of Medicine, University of Helsinki, Helsinki, Finland                                               | Aneta Szulc; Maciej Grzybek; Marlena Robakowska; Olli Vapalahti; Teemu Smura                                                                                                                                                                                                |

|                                                                                                                                                                                                                                                                                                                                                                                                                                                                                                                                                                                                                                                                                                                                                                                                                                                                                                                                                                                                                                                                                                                                                                                                                                                                                                                                                                                                                                                                                                                                                                                                                                                                                                                                                                                                                                                                                                                                                                                                                                                                                                                                                                                                                                                                                                                                |                                                                                                                   |                                                                                          |                                                                                                                                                                                                                                                                                                                                           |                                                                                                                                                                                                                                                                                                  |
|--------------------------------------------------------------------------------------------------------------------------------------------------------------------------------------------------------------------------------------------------------------------------------------------------------------------------------------------------------------------------------------------------------------------------------------------------------------------------------------------------------------------------------------------------------------------------------------------------------------------------------------------------------------------------------------------------------------------------------------------------------------------------------------------------------------------------------------------------------------------------------------------------------------------------------------------------------------------------------------------------------------------------------------------------------------------------------------------------------------------------------------------------------------------------------------------------------------------------------------------------------------------------------------------------------------------------------------------------------------------------------------------------------------------------------------------------------------------------------------------------------------------------------------------------------------------------------------------------------------------------------------------------------------------------------------------------------------------------------------------------------------------------------------------------------------------------------------------------------------------------------------------------------------------------------------------------------------------------------------------------------------------------------------------------------------------------------------------------------------------------------------------------------------------------------------------------------------------------------------------------------------------------------------------------------------------------------|-------------------------------------------------------------------------------------------------------------------|------------------------------------------------------------------------------------------|-------------------------------------------------------------------------------------------------------------------------------------------------------------------------------------------------------------------------------------------------------------------------------------------------------------------------------------------|--------------------------------------------------------------------------------------------------------------------------------------------------------------------------------------------------------------------------------------------------------------------------------------------------|
| EPI_ISL_450525 to 450530, EPI_ISL_512296 to 512303                                                                                                                                                                                                                                                                                                                                                                                                                                                                                                                                                                                                                                                                                                                                                                                                                                                                                                                                                                                                                                                                                                                                                                                                                                                                                                                                                                                                                                                                                                                                                                                                                                                                                                                                                                                                                                                                                                                                                                                                                                                                                                                                                                                                                                                                             | Hematology Laboratory, Section of Molecular Diagnostics, University Clinical Centre, Medical University of Gdansk | Department of Virology, Faculty of Medicine, University of Helsinki, Helsinki, Finland   | Aneta Szulc; Ewa Miosz; Maciej Grzybek; Marlena Robakowska; Olli Vapalahti; Teemu Smura                                                                                                                                                                                                                                                   |                                                                                                                                                                                                                                                                                                  |
| EPI_ISL_451648 to 451649, EPI_ISL_451652 to 451654                                                                                                                                                                                                                                                                                                                                                                                                                                                                                                                                                                                                                                                                                                                                                                                                                                                                                                                                                                                                                                                                                                                                                                                                                                                                                                                                                                                                                                                                                                                                                                                                                                                                                                                                                                                                                                                                                                                                                                                                                                                                                                                                                                                                                                                                             | Hematology Laboratory, Section of Molecular Diagnostics, University Clinical Centre, Medical University of Gdansk | Laboratory of Recombinant Vaccines                                                       | Adam Sodol; Aneta Szulc; Boguslaw Szewczyk; Ewa Milosz; Krystyna Bienkowska-Szewczyk; Krzysztof Lewandowski; Lukasz Rabalski; Marlena Robakowska                                                                                                                                                                                          |                                                                                                                                                                                                                                                                                                  |
| EPI_ISL_560581 to 560584, EPI_ISL_560586 to 560590, EPI_ISL_792056 to 792058                                                                                                                                                                                                                                                                                                                                                                                                                                                                                                                                                                                                                                                                                                                                                                                                                                                                                                                                                                                                                                                                                                                                                                                                                                                                                                                                                                                                                                                                                                                                                                                                                                                                                                                                                                                                                                                                                                                                                                                                                                                                                                                                                                                                                                                   | Hopital                                                                                                           | National Reference Center for Viruses of Respiratory Infections, Institut Pasteur, Paris | Angela Brisebarre; Camille Capel; Etienne Simon-Lorière; Fabiana Gambaro; Marion Barbet; Maud Vanpeene; Méline Bizard; Patricia Stoessel; Sylvie Behillil; Sylvie van der Werf; Vincent Enouf                                                                                                                                             |                                                                                                                                                                                                                                                                                                  |
| EPI_ISL_418427                                                                                                                                                                                                                                                                                                                                                                                                                                                                                                                                                                                                                                                                                                                                                                                                                                                                                                                                                                                                                                                                                                                                                                                                                                                                                                                                                                                                                                                                                                                                                                                                                                                                                                                                                                                                                                                                                                                                                                                                                                                                                                                                                                                                                                                                                                                 | Hopital Privé de l'Est Lyonnais                                                                                   | CNR Virus des Infections Respiratoires - France SUD                                      | Alexandre Gaymard; Antonin Bal; Bruno Lina; Carine Moustaud; Florence Morfin-Sherpa; Gregory Destras; Gwendolynne Burfin; Laurence Josset; Martine Valette; Maude Bouscambert-Duchamp; Raphaëlle Lamy; Solenne Brun                                                                                                                       |                                                                                                                                                                                                                                                                                                  |
| EPI_ISL_418229                                                                                                                                                                                                                                                                                                                                                                                                                                                                                                                                                                                                                                                                                                                                                                                                                                                                                                                                                                                                                                                                                                                                                                                                                                                                                                                                                                                                                                                                                                                                                                                                                                                                                                                                                                                                                                                                                                                                                                                                                                                                                                                                                                                                                                                                                                                 | Hopital franco britannique - Laboratoire                                                                          | National Reference Center for Viruses of Respiratory Infections, Institut Pasteur, Paris | Angela Brisebarre; Etienne Simon-Lorière; Flora Donati; Marianne Asso Bonnet; Marion Barbet; Maud Vanpeene; Mélanie Albert; Méline Bizard; Sylvie Behillil; Sylvie van der Werf; Vincent Enouf                                                                                                                                            |                                                                                                                                                                                                                                                                                                  |
| EPI_ISL_416501                                                                                                                                                                                                                                                                                                                                                                                                                                                                                                                                                                                                                                                                                                                                                                                                                                                                                                                                                                                                                                                                                                                                                                                                                                                                                                                                                                                                                                                                                                                                                                                                                                                                                                                                                                                                                                                                                                                                                                                                                                                                                                                                                                                                                                                                                                                 | Hopital franco britannique - Service des Urgences                                                                 | National Reference Center for Viruses of Respiratory Infections, Institut Pasteur, Paris | Angela Brisebarre; Etienne Simon-Lorière; Flora Donati; Marion Barbet; Maud Vanpeene; Méline Bizard; Méline Albert; Sylvie Behillil; Sylvie van der Werf; Vincent Enouf                                                                                                                                                                   |                                                                                                                                                                                                                                                                                                  |
| EPI_ISL_434666                                                                                                                                                                                                                                                                                                                                                                                                                                                                                                                                                                                                                                                                                                                                                                                                                                                                                                                                                                                                                                                                                                                                                                                                                                                                                                                                                                                                                                                                                                                                                                                                                                                                                                                                                                                                                                                                                                                                                                                                                                                                                                                                                                                                                                                                                                                 | Hornefors Halsocentral                                                                                            | The Public Health Agency of Sweden                                                       | Anna Risberg; Anna-Malin Linde; Camilla Eiback; Karin Tegmark-Wisell; Maria Lind Karlberg; Mia Brytting; Olov Svartstrom; Oskar Karlsson Lindsjö; Theresa Enkirch                                                                                                                                                                         |                                                                                                                                                                                                                                                                                                  |
| EPI_ISL_560598 to 560636, EPI_ISL_560643 to 560646, EPI_ISL_660323, EPI_ISL_693758 to 693764, EPI_ISL_718226 to 718249, EPI_ISL_832130 to 832166, EPI_ISL_832169 to 832177, EPI_ISL_855354 to 855356, EPI_ISL_855382, EPI_ISL_855388                                                                                                                                                                                                                                                                                                                                                                                                                                                                                                                                                                                                                                                                                                                                                                                                                                                                                                                                                                                                                                                                                                                                                                                                                                                                                                                                                                                                                                                                                                                                                                                                                                                                                                                                                                                                                                                                                                                                                                                                                                                                                           | Hospital                                                                                                          | National Reference Center for Viruses of Respiratory Infections, Institut Pasteur, Paris | Alexandra Ducancelle; Angela Brisebarre; Aurélie Guigon; Camille Capel; Clémence Guillaume; Ducancelle Alexandra; Etienne Simon-Lorière; Fabiana Gambaro; Gisèle Lagathu; Laurent Andreoletti; Léa Pilorge; Marion Barbet; Maud Vanpeene; Méline Bizard; Patricia Stoessel-Thouvenin; Sylvie Behillil; Sylvie van der Werf; Vincent Enouf |                                                                                                                                                                                                                                                                                                  |
| EPI_ISL_434366 to 434384, EPI_ISL_434386, EPI_ISL_450724 to 450732, EPI_ISL_450734 to 450737                                                                                                                                                                                                                                                                                                                                                                                                                                                                                                                                                                                                                                                                                                                                                                                                                                                                                                                                                                                                                                                                                                                                                                                                                                                                                                                                                                                                                                                                                                                                                                                                                                                                                                                                                                                                                                                                                                                                                                                                                                                                                                                                                                                                                                   | Hospital AZ Rivierenland                                                                                          | Institute of Tropical Medicine                                                           | ; Colin Anthony; Philippe Selhorst                                                                                                                                                                                                                                                                                                        |                                                                                                                                                                                                                                                                                                  |
| EPI_ISL_491439                                                                                                                                                                                                                                                                                                                                                                                                                                                                                                                                                                                                                                                                                                                                                                                                                                                                                                                                                                                                                                                                                                                                                                                                                                                                                                                                                                                                                                                                                                                                                                                                                                                                                                                                                                                                                                                                                                                                                                                                                                                                                                                                                                                                                                                                                                                 | Hospital Calderon Guardia                                                                                         | Incienza, Instituto Costarricense de Investigación y Enseñanza en Nutrición y Salud      | Adriana Godínez & Melany Calderon; Claudio Soto-Garita; Estela Cordero; Francisco Duarte; Hebleen Brenes                                                                                                                                                                                                                                  |                                                                                                                                                                                                                                                                                                  |
| EPI_ISL_539559 to 539560                                                                                                                                                                                                                                                                                                                                                                                                                                                                                                                                                                                                                                                                                                                                                                                                                                                                                                                                                                                                                                                                                                                                                                                                                                                                                                                                                                                                                                                                                                                                                                                                                                                                                                                                                                                                                                                                                                                                                                                                                                                                                                                                                                                                                                                                                                       | Hospital Campo Arañuelo                                                                                           | Instituto de Salud Carlos III                                                            | A. Monzón; F. Casas; G. Rodríguez; I; I. Jiménez; Iglesias-Caballero; J. López; M. Camarero; M. Cuesta; M. González-Esguevillas; M. Molinero Calamita; M. Zaballos; P. Jiménez; S. Juliá; S. Pozo; S. Varona                                                                                                                              |                                                                                                                                                                                                                                                                                                  |
| EPI_ISL_462479                                                                                                                                                                                                                                                                                                                                                                                                                                                                                                                                                                                                                                                                                                                                                                                                                                                                                                                                                                                                                                                                                                                                                                                                                                                                                                                                                                                                                                                                                                                                                                                                                                                                                                                                                                                                                                                                                                                                                                                                                                                                                                                                                                                                                                                                                                                 | Hospital Clinic                                                                                                   | Instituto de Salud Carlos III                                                            | A. Monzón; F. Casas; I; I. Jiménez; Iglesias-Caballero; M. Camarero; M. Cuesta; M. González-Esguevillas; M. Molinero Calamita; M. Zaballos; M.A Marcos; P. Jiménez; S. Juliá; S. Pozo; S. Varona                                                                                                                                          |                                                                                                                                                                                                                                                                                                  |
| EPI_ISL_539533 to 539556, EPI_ISL_862573 to 862588, EPI_ISL_862627 to 862636                                                                                                                                                                                                                                                                                                                                                                                                                                                                                                                                                                                                                                                                                                                                                                                                                                                                                                                                                                                                                                                                                                                                                                                                                                                                                                                                                                                                                                                                                                                                                                                                                                                                                                                                                                                                                                                                                                                                                                                                                                                                                                                                                                                                                                                   | Hospital Clinic                                                                                                   | Instituto de Salud Carlos III                                                            | A. Monzón; F. Casas; I; I. Jiménez; I. Marcos; Iglesias-Caballero; M. Pozo; M. Camarero; M. Cuesta; M. González-Esguevillas; M. Molinero Calamita; M. Zaballos; M.A Marcos; M.A.; M.Camarero; P. Jiménez; S. Juliá; S. Molinero Calamita; S. Pozo; S. Varona                                                                              |                                                                                                                                                                                                                                                                                                  |
| EPI_ISL_802726 to 802749                                                                                                                                                                                                                                                                                                                                                                                                                                                                                                                                                                                                                                                                                                                                                                                                                                                                                                                                                                                                                                                                                                                                                                                                                                                                                                                                                                                                                                                                                                                                                                                                                                                                                                                                                                                                                                                                                                                                                                                                                                                                                                                                                                                                                                                                                                       | Hospital Clínic de Barcelona                                                                                      | Instituto de Salud Carlos III                                                            | A. Monzón; F. Casas; I; I. Jiménez; Iglesias-Caballero; M. Camarero; M. Cuesta; M. González-Esguevillas; M. Molinero Calamita; M. Zaballos; M.A Marcos; ; P. Jiménez; S. Juliá; S. Pozo; S. Varona                                                                                                                                        |                                                                                                                                                                                                                                                                                                  |
| EPI_ISL_691700 to 691728, EPI_ISL_862548, EPI_ISL_862569, EPI_ISL_871985 to 871990, EPI_ISL_871992 to 871993                                                                                                                                                                                                                                                                                                                                                                                                                                                                                                                                                                                                                                                                                                                                                                                                                                                                                                                                                                                                                                                                                                                                                                                                                                                                                                                                                                                                                                                                                                                                                                                                                                                                                                                                                                                                                                                                                                                                                                                                                                                                                                                                                                                                                   | Hospital Clínico San Carlos                                                                                       | Instituto de Salud Carlos III                                                            | A. Monzón; F. Casas; I. Jiménez; I. Rodríguez, I.; Iglesias-Caballero; M. Camarero; M. Cuesta; M. González-Esguevillas; M. Pozo; M. Zaballos; P. Jiménez; S. Juliá; S. Molinero Calamita; S. Varona                                                                                                                                       |                                                                                                                                                                                                                                                                                                  |
| EPI_ISL_539500 to 539502, EPI_ISL_539509 to 539512, EPI_ISL_578190 to 578191                                                                                                                                                                                                                                                                                                                                                                                                                                                                                                                                                                                                                                                                                                                                                                                                                                                                                                                                                                                                                                                                                                                                                                                                                                                                                                                                                                                                                                                                                                                                                                                                                                                                                                                                                                                                                                                                                                                                                                                                                                                                                                                                                                                                                                                   | Hospital Clínico Universitario Lozano Blesa                                                                       | Instituto de Salud Carlos III                                                            | A. Monzón; F. Casas; I; I. Jiménez; Iglesias-Caballero; M. Camarero; M. Cuesta; M. González-Esguevillas; M. Molinero Calamita; M. Zaballos; P. Jiménez; R. Benito; S. Juliá; S. Pozo; S. Varona                                                                                                                                           |                                                                                                                                                                                                                                                                                                  |
| EPI_ISL_671794 to 671804, EPI_ISL_683595 to 683597                                                                                                                                                                                                                                                                                                                                                                                                                                                                                                                                                                                                                                                                                                                                                                                                                                                                                                                                                                                                                                                                                                                                                                                                                                                                                                                                                                                                                                                                                                                                                                                                                                                                                                                                                                                                                                                                                                                                                                                                                                                                                                                                                                                                                                                                             | Hospital Clínico Universitario Lozano Blesa de Zaragoza (España)                                                  | SeqCOVID-SPAIN consortium/IBV(CSIC)                                                      | Jessica Bueno and SeqCOVID-SPAIN consortium; Rafael Benito; Sonia Algarate                                                                                                                                                                                                                                                                |                                                                                                                                                                                                                                                                                                  |
| EPI_ISL_467262 to 467265, EPI_ISL_467267 to 467285, EPI_ISL_467287, EPI_ISL_467289 to 467297, EPI_ISL_500162, EPI_ISL_500167, EPI_ISL_500209, EPI_ISL_500219, EPI_ISL_500221, EPI_ISL_510268 to 510281, EPI_ISL_510283 to 510302                                                                                                                                                                                                                                                                                                                                                                                                                                                                                                                                                                                                                                                                                                                                                                                                                                                                                                                                                                                                                                                                                                                                                                                                                                                                                                                                                                                                                                                                                                                                                                                                                                                                                                                                                                                                                                                                                                                                                                                                                                                                                               | Hospital Clínico Universitario de Santiago de Compostela                                                          | SeqCOVID-SPAIN consortium/IBV(CSIC)                                                      | Amparo Coira Nieto; Antonio Aguilera Guirao; Gema Barbeito Castiñeiras; José Javier Costa Alcalde; Mª Luisa Pérez del Molino Bernal; Rocio Trastoy Pena and SeqCOVID-SPAIN consortium                                                                                                                                                     |                                                                                                                                                                                                                                                                                                  |
| EPI_ISL_541037 to 541066                                                                                                                                                                                                                                                                                                                                                                                                                                                                                                                                                                                                                                                                                                                                                                                                                                                                                                                                                                                                                                                                                                                                                                                                                                                                                                                                                                                                                                                                                                                                                                                                                                                                                                                                                                                                                                                                                                                                                                                                                                                                                                                                                                                                                                                                                                       | Hospital Clínico Universitario de Santiago de Compostela                                                          | SeqCOVID-SPAIN consortium/Institute of Biomedicine of Valencia, IBV-CSIC                 | Amparo Coira Nieto; Antonio Aguilera Guirao; Gema Barbeito Castiñeiras; José Javier Costa Alcalde; Mª Luisa Pérez del Molino Bernal; Rocio Trastoy Pena and SeqCOVID-SPAIN consortium                                                                                                                                                     |                                                                                                                                                                                                                                                                                                  |
| EPI_ISL_455344 to 455349, EPI_ISL_539567 to 539568, EPI_ISL_804949, EPI_ISL_804952 to 804979, EPI_ISL_862589 to 862626                                                                                                                                                                                                                                                                                                                                                                                                                                                                                                                                                                                                                                                                                                                                                                                                                                                                                                                                                                                                                                                                                                                                                                                                                                                                                                                                                                                                                                                                                                                                                                                                                                                                                                                                                                                                                                                                                                                                                                                                                                                                                                                                                                                                         | Hospital Comarcal de Melilla                                                                                      | Instituto de Salud Carlos III                                                            | A. Monzón; C. Ezpeleta; F. Casas; I; I. Jiménez; I. López, J.; I. Pérez; Iglesias-Caballero; J. López; M. Camarero; M. Cuesta; M. González-Esguevillas; M. Molinero Calamita; M. Pozo; M. Zaballos; P. Jiménez; S. Juliá; S. Molinero Calamita; S. Pozo; S. Varona                                                                        |                                                                                                                                                                                                                                                                                                  |
| EPI_ISL_462477, EPI_ISL_539499                                                                                                                                                                                                                                                                                                                                                                                                                                                                                                                                                                                                                                                                                                                                                                                                                                                                                                                                                                                                                                                                                                                                                                                                                                                                                                                                                                                                                                                                                                                                                                                                                                                                                                                                                                                                                                                                                                                                                                                                                                                                                                                                                                                                                                                                                                 | Hospital Costa del Sol                                                                                            | Instituto de Salud Carlos III                                                            | A. Monzón; F. Casas; F. Fernández; I; I. Jiménez; Iglesias-Caballero; M. Camarero; M. Cuesta; M. González-Esguevillas; M. Molinero Calamita; M. Zaballos; P. Jiménez; S. Juliá; S. Pozo; S. Varona                                                                                                                                        |                                                                                                                                                                                                                                                                                                  |
| EPI_ISL_512654                                                                                                                                                                                                                                                                                                                                                                                                                                                                                                                                                                                                                                                                                                                                                                                                                                                                                                                                                                                                                                                                                                                                                                                                                                                                                                                                                                                                                                                                                                                                                                                                                                                                                                                                                                                                                                                                                                                                                                                                                                                                                                                                                                                                                                                                                                                 | Hospital Dr. Rafael A. Calderon Guardia [San Jose/San Jose]                                                       | Incienza, Instituto Costarricense de Investigación y Enseñanza en Nutrición y Salud      | Adriana Godínez & Melany Calderon; Claudio Soto-Garita; Estela Cordero; Francisco Duarte; Hebleen Porras                                                                                                                                                                                                                                  |                                                                                                                                                                                                                                                                                                  |
| EPI_ISL_578186                                                                                                                                                                                                                                                                                                                                                                                                                                                                                                                                                                                                                                                                                                                                                                                                                                                                                                                                                                                                                                                                                                                                                                                                                                                                                                                                                                                                                                                                                                                                                                                                                                                                                                                                                                                                                                                                                                                                                                                                                                                                                                                                                                                                                                                                                                                 | Hospital General Juan Ramón Jiménez                                                                               | Instituto de Salud Carlos III                                                            | A. Monzón; F. Casas; I; I. Jiménez; Iglesias-Caballero; J. Saavedra; M. Camarero; M. Cuesta; M. González-Esguevillas; M. Molinero Calamita; M. Zaballos; P. Jiménez; S. Juliá; S. Pozo; S. Varona                                                                                                                                         |                                                                                                                                                                                                                                                                                                  |
| EPI_ISL_756271, EPI_ISL_756273 to 756274, EPI_ISL_776770, EPI_ISL_776875, EPI_ISL_776877, EPI_ISL_777490, EPI_ISL_777902, EPI_ISL_778445, EPI_ISL_778644 to 778645, EPI_ISL_803854 to 803864                                                                                                                                                                                                                                                                                                                                                                                                                                                                                                                                                                                                                                                                                                                                                                                                                                                                                                                                                                                                                                                                                                                                                                                                                                                                                                                                                                                                                                                                                                                                                                                                                                                                                                                                                                                                                                                                                                                                                                                                                                                                                                                                   | see above                                                                                                         | Hospital General Universitario Gregorio Marañón                                          | Darío García de Viedma; Darío García de Viedma.; Laura Perez-Lago; Laura Pérez-Lago; Patricia Muñoz; Pedro Sola Campoy; Pilar Catalán; Sergio Buenestado Serrano                                                                                                                                                                          |                                                                                                                                                                                                                                                                                                  |
| EPI_ISL_467184 to 467199, EPI_ISL_467201 to 467261, EPI_ISL_481041 to 481045, EPI_ISL_481047 to 481060, EPI_ISL_481062 to 481084, EPI_ISL_481086 to 481109, EPI_ISL_510104 to 510106, EPI_ISL_510109 to 510128, EPI_ISL_510130 to 510151, EPI_ISL_510165 to 510167, EPI_ISL_510169 to 510186, EPI_ISL_510188 to 510213, EPI_ISL_510215 to 510243, EPI_ISL_510245, EPI_ISL_541878, EPI_ISL_541880 to 541895, EPI_ISL_541897 to 541941, EPI_ISL_582812 to 582832, EPI_ISL_582843 to 582844, EPI_ISL_654021 to 654050, EPI_ISL_654052 to 654063, EPI_ISL_654065 to 654124, EPI_ISL_654126 to 654134, EPI_ISL_654137 to 654138, EPI_ISL_654140 to 654162, EPI_ISL_654164 to 654169, EPI_ISL_654171, EPI_ISL_654174 to 654193, EPI_ISL_654195 to 654205, EPI_ISL_654207 to 654226, EPI_ISL_654228 to 654236, EPI_ISL_654238 to 654239, EPI_ISL_654241 to 654251, EPI_ISL_654253 to 654255, EPI_ISL_654257 to 654268, EPI_ISL_654270 to 654275, EPI_ISL_654277 to 654297, EPI_ISL_654299 to 654305, EPI_ISL_654307 to 654316, EPI_ISL_654318 to 654329, EPI_ISL_654331 to 654333, EPI_ISL_654335 to 654336, EPI_ISL_654341, EPI_ISL_654343 to 654353, EPI_ISL_654355 to 654357, EPI_ISL_654360 to 654384, EPI_ISL_654386 to 654393, EPI_ISL_654395 to 654400, EPI_ISL_779955 to 780021, EPI_ISL_780023 to 780028, EPI_ISL_780030 to 780032, EPI_ISL_780034 to 780037, EPI_ISL_780039 to 780043, EPI_ISL_780046 to 780049, EPI_ISL_780051, EPI_ISL_780053, EPI_ISL_780055, EPI_ISL_780057 to 780068, EPI_ISL_780070 to 780073, EPI_ISL_780075 to 780081, EPI_ISL_780083 to 780095, EPI_ISL_780414 to 780415, EPI_ISL_813980 to 813982, EPI_ISL_813984 to 813986, EPI_ISL_813989 to 813994, EPI_ISL_813997 to 813999, EPI_ISL_814001 to 814006, EPI_ISL_814008, EPI_ISL_814015 to 814016, EPI_ISL_814018 to 814020, EPI_ISL_814022, EPI_ISL_814026 to 814033, EPI_ISL_814037 to 814038, EPI_ISL_814040, EPI_ISL_814051 to 814061, EPI_ISL_852953, EPI_ISL_852958, EPI_ISL_852961, EPI_ISL_852974, EPI_ISL_852983, EPI_ISL_852988 to 852989, EPI_ISL_852991, EPI_ISL_852998, EPI_ISL_853000, EPI_ISL_853002, EPI_ISL_853016, EPI_ISL_861774 to 861777, EPI_ISL_861779 to 861784, EPI_ISL_861786 to 861798, EPI_ISL_861800 to 861807, EPI_ISL_861820, EPI_ISL_861822, EPI_ISL_861825 to 861845, EPI_ISL_861847, EPI_ISL_861849 to 861855 | see above                                                                                                         | Hospital General Universitario Gregorio Marañón                                          | SeqCOVID-SPAIN consortium/IBV(CSIC)                                                                                                                                                                                                                                                                                                       | Darío García de Viedma; Darío García de Viedma and SeqCOVID-SPAIN consortium; Jon Sicilia; Julia Suárez; Laura Pérez-Lago; Marta Herranz; Patricia Muñoz; Patricia Muñoz and SeqCOVID-SPAIN consortium; Pedro J Sola-Campoy; Pilar Catalán; Sergio Buenestado-Serrano; Víctor Manuel de la Cueva |
| EPI_ISL_756272                                                                                                                                                                                                                                                                                                                                                                                                                                                                                                                                                                                                                                                                                                                                                                                                                                                                                                                                                                                                                                                                                                                                                                                                                                                                                                                                                                                                                                                                                                                                                                                                                                                                                                                                                                                                                                                                                                                                                                                                                                                                                                                                                                                                                                                                                                                 | Hospital General Universitario La Princesa                                                                        | Hospital General Universitario Gregorio Marañón                                          | Andrés Von Wernitz; Arturo fraile Torres; Carmen del Arco; Darío García de Viedma.; Laura Cardeñoso; Patricia Muñoz; Pedro Sola Campoy; Pilar Catalán; Sergio Buenestado Serrano                                                                                                                                                          |                                                                                                                                                                                                                                                                                                  |
| EPI_ISL_691682 to 691683                                                                                                                                                                                                                                                                                                                                                                                                                                                                                                                                                                                                                                                                                                                                                                                                                                                                                                                                                                                                                                                                                                                                                                                                                                                                                                                                                                                                                                                                                                                                                                                                                                                                                                                                                                                                                                                                                                                                                                                                                                                                                                                                                                                                                                                                                                       | Hospital General Universitario de Ciudad Real                                                                     | Instituto de Salud Carlos III                                                            | A. Monzón; F. Casas; I. Jarilla, M.; I. Jiménez; I. Madrigal, M.; Iglesias-Caballero; M. Camarero; M. Cuesta; M. González-Esguevillas; M. Pozo; M. Zaballos; P. Jiménez; S. Juliá; S. Molinero Calamita; S. Varona                                                                                                                        |                                                                                                                                                                                                                                                                                                  |
| EPI_ISL_539523                                                                                                                                                                                                                                                                                                                                                                                                                                                                                                                                                                                                                                                                                                                                                                                                                                                                                                                                                                                                                                                                                                                                                                                                                                                                                                                                                                                                                                                                                                                                                                                                                                                                                                                                                                                                                                                                                                                                                                                                                                                                                                                                                                                                                                                                                                                 | Hospital General de Segovia                                                                                       | Instituto de Salud Carlos III                                                            | A. Monzón; F. Casas; I; I. Jiménez; Iglesias-Caballero; M. Camarero; M. Cuesta; M. González-Esguevillas; M. Molinero Calamita; M. Zaballos; P. Jiménez; S. Hernando; S. Juliá; S. Pozo; S. Varona                                                                                                                                         |                                                                                                                                                                                                                                                                                                  |
| EPI_ISL_418245 to 418246                                                                                                                                                                                                                                                                                                                                                                                                                                                                                                                                                                                                                                                                                                                                                                                                                                                                                                                                                                                                                                                                                                                                                                                                                                                                                                                                                                                                                                                                                                                                                                                                                                                                                                                                                                                                                                                                                                                                                                                                                                                                                                                                                                                                                                                                                                       | Hospital General y Universitario de Guadalajara                                                                   | Instituto de Salud Carlos III                                                            | A. Monzón; F. Casas; I. Gonzalez-Praetorius A.; I. Jiménez; Iglesias-Caballero; M. Camarero; M. Cuesta; M. González-Esguevillas; M. Molinero Calamita;                                                                                                                                                                                    |                                                                                                                                                                                                                                                                                                  |

|                                                                                                                                                                                                                                                                                                    |                                                                                                        |                                                                                      |                                                                                                                                                                                                                                                                                                                                                                                                                                       |
|----------------------------------------------------------------------------------------------------------------------------------------------------------------------------------------------------------------------------------------------------------------------------------------------------|--------------------------------------------------------------------------------------------------------|--------------------------------------------------------------------------------------|---------------------------------------------------------------------------------------------------------------------------------------------------------------------------------------------------------------------------------------------------------------------------------------------------------------------------------------------------------------------------------------------------------------------------------------|
| EPI_ISL_871974 to 871975, EPI_ISL_871979                                                                                                                                                                                                                                                           | Hospital Infanta Cristina                                                                              | Instituto de Salud Carlos III                                                        | M. Zaballos; P. Jiménez; S. Juliá; S. Pozo; S. Varona<br>A. Monzón; F. Casas; I. García, P.; I. Jiménez; Iglesias-Caballero; M. Camarero; M. Cuesta; M. González-Esguevillas; M. Pozo; M. Zaballos; P. Jiménez; S. Juliá; S. Molinero Calamita; S. Varona                                                                                                                                                                             |
| EPI_ISL_412964                                                                                                                                                                                                                                                                                     | Hospital Israelita Albert Einstein                                                                     | Instituto Adolfo Lutz Interdisciplinary Procedures Center Strategic Laboratory       | Andrew Rambaut; Claudia Regina Gonçalves; Claudio Tavares Sacchi; Daniela Bernardes Borges da Silva; Ester Cerdeira Sabino; Flávia Cristina da Silva Sales; Ingra Morales Claro; Jaqueline Goes de Jesus; Joshua Quick; Maria do Carmo; Nicholas James Loman; Nuno Rodrigues Faria; Sampaio Tavares Timenetsky                                                                                                                        |
| EPI_ISL_414014, EPI_ISL_416033                                                                                                                                                                                                                                                                     | Hospital Israelita Albert Einstein                                                                     | Instituto Adolfo Lutz, Interdisciplinary Procedures Center, Strategic Laboratory     | Adriana Bugno; Adriano Abbud; Carlos Henrique Camargo; Claudia Regina Gonçalves; Claudio Tavares Sacchi; Daniela Bernardes Borges da Silva; Erica Valessa Ramos Gomes; Ester Cerdeira Sabino; Fabiana Cristina Pereira dos Santos; Katia Correia dos Santos; Maria do Carmo Sampaio Tavares Timenetsky; Maria do Carmo Sampaio Tavares Timenetsky; Simone Guadagnucci Morillo; Terezinha Maria de Paiva                               |
| EPI_ISL_413016                                                                                                                                                                                                                                                                                     | Hospital Israelita Albert Einstein                                                                     | Instituto Adolfo Lutz, Interdisciplinary Procedures Center, Strategic Laboratory     | Andrew Rambaut; Claudia Regina Gonçalves; Claudio Tavares Sacchi; Ester Cerdeira Sabino; Fabiana Cristina Pereira dos Santos; Flávia Cristina da Silva Sales; Ingra Morales Claro; Jaqueline Goes de Jesus; Joshua Quick; Maria do Carmo Sampaio Tavares Timenetsky; Nicholas James Loman; Nuno Rodrigues Faria                                                                                                                       |
| EPI_ISL_862551                                                                                                                                                                                                                                                                                     | Hospital J.M. Morales Meseguer                                                                         | Instituto de Salud Carlos III                                                        | A. Monzón; F. Casas; I. Guerrero, C.; I. Jiménez; Iglesias-Caballero; M. . Pozo; M. Camarero; M. Cuesta; M. González-Esguevillas; M. Zaballos; P. Jiménez; S. Juliá; S. Molinero Calamita; S. Varona                                                                                                                                                                                                                                  |
| EPI_ISL_539496                                                                                                                                                                                                                                                                                     | Hospital Nostra Senyora de Meritxell                                                                   | Instituto de Salud Carlos III                                                        | A. Monzón; F. Casas; F. Fernández; I; I. Jiménez; Iglesias-Caballero; M. Camarero; M. Cuesta; M. González-Esguevillas; M. Molinero Calamita; M. Zaballos; P. Jiménez; S. Juliá; S. Pozo; S. Varona                                                                                                                                                                                                                                    |
| EPI_ISL_539525, EPI_ISL_862637 to 862639                                                                                                                                                                                                                                                           | Hospital Nuestra Señora de Sonsoles                                                                    | Instituto de Salud Carlos III                                                        | A. Monzón; A. San Pedro; F. Casas; I; I. Jiménez; Iglesias-Caballero; M. Camarero; M. Cuesta; M. González-Esguevillas; M. Molinero Calamita; M. Zaballos; P. Jiménez; S. Juliá; S. Pozo; S. Varona                                                                                                                                                                                                                                    |
| EPI_ISL_419386 to 419387                                                                                                                                                                                                                                                                           | Hospital Prof. Doutor Fernando Fonseca, EPE                                                            | Instituto Gulbenkian de Ciência                                                      | Cathy Paulino; Joao Sobral; João Costa; Ricardo Leite; Susana Ladeiro                                                                                                                                                                                                                                                                                                                                                                 |
| EPI_ISL_491454                                                                                                                                                                                                                                                                                     | Hospital San Juan de Dios                                                                              | Incienza, Instituto Costarricense de Investigación y Enseñanza en Nutrición y Salud  | Adriana Godínez & Melany Calderon; Claudio Soto-Garita; Estela Cordero; Francisco Duarte; Hebleen Brenes                                                                                                                                                                                                                                                                                                                              |
| EPI_ISL_419234, EPI_ISL_455336 to 455343, EPI_ISL_578196 to 578201                                                                                                                                                                                                                                 | Hospital San Pedro                                                                                     | Instituto de Salud Carlos III                                                        | A. Monzón; Alonso, C.; C. Alonso; Camarero, S.; Casas, I.; Cuesta, I.; F. Casas; González-Esguevillas, M.; I; I. Jiménez; Iglesias-Caballero; Iglesias-Caballero, M.; J.M Azcona; Jiménez, M.; Jiménez, P.; Juliá, M.; M. Blasco; M. Camarero; M. Cuesta; M. González-Esguevillas; M. Molinero Calamita; M. Zaballos; Molinero Calamita, M.; Monzón, S.; P. Jiménez; Pozo, F.; S. Juliá; S. Pozo; S. Varona; Varona, S.; Zaballos, A. |
| EPI_ISL_539558, EPI_ISL_539561 to 539562, EPI_ISL_862654                                                                                                                                                                                                                                           | Hospital San Pedro de Alcántara                                                                        | Instituto de Salud Carlos III                                                        | A. Monzón; E. Cerro; F. Casas; I; I. Jiménez; I. Rodríguez, G.; Iglesias-Caballero; J. López; M. Pozo; M. Camarero; M. Cuesta; M. González-Esguevillas; M. Molinero Calamita; M. Zaballos; M.A Cañizares; M.Camarero; P. Jiménez; S. Juliá; S. Molinero Calamita; S. Pozo; S. Varona                                                                                                                                                  |
| EPI_ISL_510305, EPI_ISL_510307 to 510332                                                                                                                                                                                                                                                           | Hospital San Pedro de Alcántara (Cáceres)                                                              | SeqCOVID-SPAIN consortium/IBV(CSIC)                                                  | Cristina Muñoz Cuevas; Guadalupe Rodríguez Rodríguez and SeqCOVID-SPAIN consortium                                                                                                                                                                                                                                                                                                                                                    |
| EPI_ISL_802750 to 802776                                                                                                                                                                                                                                                                           | Hospital Santa María Nai                                                                               | Instituto de Salud Carlos III                                                        | A. Monzón; F. Casas; I; I. Jiménez; Iglesias-Caballero; J. García.; M. Camarero; M. Cuesta; M. González-Esguevillas; M. Molinero Calamita; M. Zaballos; P. Jiménez; S. Juliá; S. Pozo; S. Varona                                                                                                                                                                                                                                      |
| EPI_ISL_524484                                                                                                                                                                                                                                                                                     | Hospital Schwyz                                                                                        | Institute of Medical Virology, University of Zurich                                  | Alexandra Trkola; Andrea Zbinden; Fiona Steiner; Gabriela Ziltener; Jon Huder; Jürg Böni; Maryam Zaheri; Michael Huber; Patrick Redli; Riccarda Capaul; Stefan Schmutz; Verena Kufner                                                                                                                                                                                                                                                 |
| EPI_ISL_414017                                                                                                                                                                                                                                                                                     | Hospital São Joaquim Beneficencia Portuguesa                                                           | Instituto Adolfo Lutz, Interdisciplinary Procedures Center, Strategic Laboratory     | Carlos Henrique Camargo; Claudia Regina Gonçalves; Claudio Tavares Sacchi; Daniela Bernardes Borges da Silva; Ester Cerdeira Sabino; Fabiana Cristina Pereira dos Santos; Maria do Carmo Sampaio Tavares Timenetsky; Terezinha Maria de Paiva                                                                                                                                                                                         |
| EPI_ISL_455350 to 455351                                                                                                                                                                                                                                                                           | Hospital Txagorritxu                                                                                   | Instituto de Salud Carlos III                                                        | A. Monzón; C. Gómez; F. Casas; I; I. Jiménez; Iglesias-Caballero; M. Camarero; M. Cuesta; M. González-Esguevillas; M. Molinero Calamita; M. Zaballos; P. Jiménez; S. Juliá; S. Pozo; S. Varona                                                                                                                                                                                                                                        |
| EPI_ISL_483059                                                                                                                                                                                                                                                                                     | Hospital Universitari Germans Trias i Pujol                                                            | IrsiCaixa AIDS Research Lab                                                          | A. Valencia; B. Clotet; C. Avila-Nieto; E. Vidal; G. Cantero; I. Blanco; J. Blanco; J. Carrillo; J. Rodon; J. Segalés; J. Vergara-Alert; M. Noguera-Julian; M. Parera; M. Puig; M.T. Terrón; N. Izquierdo-Useros; S. Cruz; V. Guallar                                                                                                                                                                                                 |
| EPI_ISL_535575, EPI_ISL_538552                                                                                                                                                                                                                                                                     | Hospital Universitari Germans Trias i Pujol(HUGTiP)/Fundació Lluita contra la SIDA (FLSida)            | IrsiCaixa AIDS Research Lab                                                          | Bonaventura Clotet; Ester Ballana; Joaquim Segalés; Jorge Carrillo; Julia Blanco; Lidia Ruiz; Marc Noguera-Julian; Maria Pilar Armengol; Mariona Parera; Marta Massanella; Nuria Izquierdo; Roger Paredes                                                                                                                                                                                                                             |
| EPI_ISL_471472, EPI_ISL_510689                                                                                                                                                                                                                                                                     | Hospital Universitari Germans Trias i Pujol(HUGTiP)/Fundació Lluita contra la SIDA (FLSida)/IRTA-CReSA | IrsiCaixa AIDS Research Lab                                                          | Albert Bensaid; Bonaventura Clotet; Joaquim Segalés; Jordi Rodón; Jorge Carrillo; Julia Blanco; Julia Vergara; Lidia Ruiz; Marc Noguera-Julian; Nuria Izquierdo; Pilar Armengol; Roger Paredes                                                                                                                                                                                                                                        |
| EPI_ISL_516193                                                                                                                                                                                                                                                                                     | Hospital Universitari Germans Trias i Pujol.                                                           | IrsiCaixa AIDS Research Lab                                                          | Bonaventura Clotet; Ester Ballana; Joaquim Segalés; Jorge Carrillo; Julia Blanco; Lidia Ruiz; Marc Noguera-Julian; Maria Pilar Armengol; Mariona Parera; Marta Massanella; Nuria Izquierdo; Roger Paredes                                                                                                                                                                                                                             |
| EPI_ISL_418860 to 418861, EPI_ISL_728364 to 728365                                                                                                                                                                                                                                                 | Hospital Universitari Vall d'Hebron (HUVH) - Vall d'Hebron Research Institute (VHIR)                   | Hospital Universitari Vall d'Hebron (HUVH) - Vall d'Hebron Research Institute (VHIR) | Andrés Antón; Ariadna Rando; Aroa Silgado; Carla Castillo; Cristina Andrés; Damir Garcia-Cehic; Dàmir Garcia-Cehic; Elena Sulleiro; Josep F Abril; Josep Quer; Juliana Esperalba; Maria Carmen Martín; Maria Gema Codina; Maria Piñana; Mercedes Guerrero-Murillo; Tomás Pumarola                                                                                                                                                     |
| EPI_ISL_728362                                                                                                                                                                                                                                                                                     | Hospital Universitari Vall d'Hebron (HUVH) - Vall d'Hebron Research Institute (VHIR)                   | Hospital Universitari Vall d'Hebron - Vall d'Hebron Research Institute (VHIR)        | Andrés Antón; Ariadna Rando; Aroa Silgado; Carla Castillo; Cristina Andrés; Damir Garcia-Cehic; Elena Sulleiro; Josep F Abril; Josep Quer; Juliana Esperalba; Maria Carmen Martín; Maria Gema Codina; Maria Piñana; Tomás Pumarola                                                                                                                                                                                                    |
| EPI_ISL_728361                                                                                                                                                                                                                                                                                     | Hospital Universitari Vall d'Hebron (HUVH) - Vall d'Hebron Research Institute (VHIR)                   | Hospital Universitari Vall d'Hebron - Vall d'hebron Research Institut (VHIR)         | Andrés Antón; Ariadna Rando; Aroa Silgado; Carla Castillo; Cristina Andrés; Damir Garcia-Cehic; Elena Sulleiro; Josep F Abril; Josep Quer; Juliana Esperalba; Maria Carmen Martín; Maria Gema Codina; Maria Piñana; Tomás Pumarola                                                                                                                                                                                                    |
| EPI_ISL_444980 to 444983                                                                                                                                                                                                                                                                           | Hospital Universitari Vall d'Hebron - Vall d'hebron Institut de Recerca                                | Hospital Universitari Vall d'Hebron                                                  | Andrés Antón; Ariadna Rando; Cristina Andrés; Damir Garcia-Cehic; Josep Quer; Juliana Esperalba; Maria Gema Codina; Maria Piñana; Mercedes Guerrero-Murillo; Tomás Pumarola                                                                                                                                                                                                                                                           |
| EPI_ISL_444971 to 444972, EPI_ISL_444974 to 444979, EPI_ISL_444984 to 444990, EPI_ISL_447532 to 447533, EPI_ISL_450337, EPI_ISL_458130 to 458131                                                                                                                                                   | Hospital Universitari Vall d'Hebron - Vall d'Hebron Institut de Recerca                                | Hospital Universitari Vall d'Hebron                                                  | Andrés Antón; Ariadna Rando; Cristina Andrés; DAmir Garcia-Cehic; Damir Garcia-Cehic; Josep Gregori; Josep Quer; Juliana Esperalba; Maria Carmen Martín; Maria Carmen Martín; Maria Gema Codina; Maria Piñana; Mercedes Guerrero-Murillo; Tomás Pumarola                                                                                                                                                                              |
| EPI_ISL_458132, EPI_ISL_819293 to 819327, EPI_ISL_819329 to 819363, EPI_ISL_824411 to 824512, EPI_ISL_825326 to 825327, EPI_ISL_825335 to 825384, EPI_ISL_825620 to 825625, EPI_ISL_825627 to 825628, EPI_ISL_825630 to 825631                                                                     | Hospital Universitari Vall d'Hebron - Vall d'Hebron Institut de Recerca                                | Hospital Universitari Vall d'Hebron                                                  | Andrés Antón; Ariadna Rando; Carla Castillo; Cristina Andrés; Damir Garcia-Cehic; Josep F Abril; Josep Gregori; Josep Quer; Juliana Esperalba; Maria Carmen Martín; Maria Gema Codina; Maria Piñana; Mercedes Guerrero-Murillo; Tomás Pumarola                                                                                                                                                                                        |
| see above                                                                                                                                                                                                                                                                                          | Hospital Universitari Vall d'Hebron - Vall d'Hebron Institut de Recerca                                | Hospital Universitari Vall d'Hebron                                                  | Andrés Antón; Ariadna Rando; Cristina Andrés; DAmir Garcia-Cehic; Damir Garcia-Cehic; Josep Gregori; Josep Quer; Juliana Esperalba; Maria Carmen Martín; Maria Gema Codina; Maria Piñana; Mercedes Guerrero-Murillo; Tomás Pumarola                                                                                                                                                                                                   |
| EPI_ISL_444973                                                                                                                                                                                                                                                                                     | Hospital Universitari Vall d'Hebron - Vall d'Hebron Institut de Recerca                                | Hospital Universitari Vall d'Hebron                                                  | Andrés Antón; Ariadna Rando; Cristina Andrés; Damir Garcia-Cehic; Josep Quer; Juliana Esperalba; Maria Gema Codina; Maria Piñana; Mercedes Guerrero-Murillo; Tomás Pumarola                                                                                                                                                                                                                                                           |
| EPI_ISL_538003 to 538009, EPI_ISL_538011 to 538054, EPI_ISL_539245                                                                                                                                                                                                                                 | Hospital Universitari i Politècnic La Fe de València                                                   | SeqCOVID-SPAIN consortium/IBV(CSIC)                                                  | Ana Gil Brusola; Eva González Barbera; José Luis López Hontangas and SeqCOVID-SPAIN consortium; María Dolores Gómez Ruiz; Salvador Giner Almaraz                                                                                                                                                                                                                                                                                      |
| EPI_ISL_421171 to 421180, EPI_ISL_428683 to 428711, EPI_ISL_430718, EPI_ISL_529972 to 530024, EPI_ISL_534327 to 534329, EPI_ISL_737930                                                                                                                                                             | Hospital Universitario 12 de Octubre                                                                   | Hospital Universitario 12 de Octubre                                                 | Elias Dahdouh; Esther Viedma; Fernando Lázaro; Irene Muñoz-Gallego; Jesús Mingorance; Juan Carlos Galán; Julio García; Ma Dolores Folgueira; Mª Dolores Folgueira; Natalia Stella; Rafael Cantón; Rafael Delgado; Raul Recio; Raúl Recio; Sara González                                                                                                                                                                               |
| EPI_ISL_417952, EPI_ISL_417954, EPI_ISL_417956 to 417957, EPI_ISL_417961, EPI_ISL_417963, EPI_ISL_417967, EPI_ISL_418182                                                                                                                                                                           | Hospital Universitario 12 de Octubre                                                                   | Hospital Universitario La Paz                                                        | Elias Dahdouh; Esther Viedma; Fernando Lázaro; Jesús Mingorance; Juan Carlos Galán; Julio García; Mª Dolores Folgueira; Natalia Stella; Rafael Cantón; Rafael Delgado; Sara González                                                                                                                                                                                                                                                  |
| EPI_ISL_467092 to 467117, EPI_ISL_467119 to 467183, EPI_ISL_500228 to 500235, EPI_ISL_500237 to 500286, EPI_ISL_509616 to 509618, EPI_ISL_537874 to 537880, EPI_ISL_537882, EPI_ISL_537884 to 537905, EPI_ISL_537907 to 537924, EPI_ISL_537926 to 537945, EPI_ISL_538118, EPI_ISL_538231 to 538232 | Hospital Universitario Araba. Vitoria-Gasteiz                                                          | SeqCOVID-SPAIN consortium/IBV(CSIC)                                                  | Amaia Aguirre Quiñonero; Andrés Canut Blasco and SeqCOVID-SPAIN consortium; Andrés Canut Blasco. and SeqCOVID-SPAIN consortium; Carmen                                                                                                                                                                                                                                                                                                |

|                                                                                                                                                                                                                                                                                                                                                                                                                                                                                                                                                                                                                                                                        |                                                                                     |                                                                         |                                                                                                                                                                                                                                                                                                                                                                                                                |
|------------------------------------------------------------------------------------------------------------------------------------------------------------------------------------------------------------------------------------------------------------------------------------------------------------------------------------------------------------------------------------------------------------------------------------------------------------------------------------------------------------------------------------------------------------------------------------------------------------------------------------------------------------------------|-------------------------------------------------------------------------------------|-------------------------------------------------------------------------|----------------------------------------------------------------------------------------------------------------------------------------------------------------------------------------------------------------------------------------------------------------------------------------------------------------------------------------------------------------------------------------------------------------|
|                                                                                                                                                                                                                                                                                                                                                                                                                                                                                                                                                                                                                                                                        |                                                                                     |                                                                         | Gómez González; Ma Concepción Lecaroz Agara; Ma Rosario Almela Ferrer; Marina Fernández Torres; Mª Concepción Lecaroz Agara; Mª Rosario Almela Ferrer; Silvia Hernáez Crespo                                                                                                                                                                                                                                   |
| EPI_ISL_452692 to 452756, EPI_ISL_452758 to 452786                                                                                                                                                                                                                                                                                                                                                                                                                                                                                                                                                                                                                     | Hospital Universitario Araba. Vitoria-Gasteiz,                                      | SeqCOVID-SPAIN consortium/IBV(CSIC)                                     | Amaia Aguirre Quiñonero; Andrés Canut Blasco and SeqCOVID-SPAIN consortium; Carmen Gómez González; María Concepción Lecaroz Agara; María Rosario Almela Ferrer; Marina Fernández Torres; Silvia Hernáez Crespo                                                                                                                                                                                                 |
| EPI_ISL_455326                                                                                                                                                                                                                                                                                                                                                                                                                                                                                                                                                                                                                                                         | Hospital Universitario Insular de Gran Canaria                                      | Instituto de Salud Carlos III                                           | A. Hernández; A. Monzón; F. Casas; I; I. Jiménez; Iglesias-Caballero; M. Camarero; M. Cuesta; M. González-Esguevillas; M. Molinero Calamita; M. Zaballos; P. Jiménez; S. Juliá; S. Pozo; S. Varona                                                                                                                                                                                                             |
| EPI_ISL_428674 to 428682, EPI_ISL_430719 to 430721, EPI_ISL_435144                                                                                                                                                                                                                                                                                                                                                                                                                                                                                                                                                                                                     | Hospital Universitario La Paz                                                       | Hospital Universitario 12 de Octubre                                    | Elias Dahdouh; Esther Viedma; Fernando Lázaro; Jesús Mingorance; Juan Carlos Galán; Julio García; Mª Dolores Folgueira; Natalia Stella; Rafael Cantón; Rafael Delgado; Raúl Recio; Sara González                                                                                                                                                                                                               |
| EPI_ISL_417969, EPI_ISL_417972, EPI_ISL_417975, EPI_ISL_417978, EPI_ISL_530025 to 530093, EPI_ISL_534330 to 534333                                                                                                                                                                                                                                                                                                                                                                                                                                                                                                                                                     | Hospital Universitario La Paz                                                       | Hospital Universitario La Paz                                           | Elias Dahdouh; Esther Viedma; Fernando Lázaro; Jesús Mingorance; Juan Carlos Galán; Julio García; Ma Dolores Folgueira; María Rodríguez; Mª Dolores Folgueira; Natalia Stella; Rafael Cantón; Rafael Delgado; Raúl Recio; Sara González                                                                                                                                                                        |
| EPI_ISL_831021 to 831116, EPI_ISL_831118 to 831288                                                                                                                                                                                                                                                                                                                                                                                                                                                                                                                                                                                                                     | Hospital Universitario La Paz (Madrid)                                              | SeqCOVID-SPAIN consortium/IBV(CSIC)                                     | Elias Dahdouh; Fernando Lázaro-Perona; Jesús Mingorance and SeqCOVID-SPAIN consortium; María Rodríguez-Tejedor                                                                                                                                                                                                                                                                                                 |
| EPI_ISL_871976 to 871977                                                                                                                                                                                                                                                                                                                                                                                                                                                                                                                                                                                                                                               | Hospital Universitario Lozano Belsa                                                 | Instituto de Salud Carlos III                                           | A. Monzón; F. Casas; I. Benito, R.; I. Jiménez; Iglesias-Caballero; M. Camarero; M. Cuesta; M. González-Esguevillas; M. Pozo; M. Zaballos; P. Jiménez; S. Juliá; S. Molinero Calamita; S. Varona                                                                                                                                                                                                               |
| EPI_ISL_537809 to 537810                                                                                                                                                                                                                                                                                                                                                                                                                                                                                                                                                                                                                                               | Hospital Universitario Marqués de Valdecilla (Santander), Servicio de Microbiología | SeqCOVID-SPAIN consortium/IBV(CSIC)                                     | Daniel Pablo Marcos; Jesús Rodríguez Lozano; Jose Manuel Méndez Legaza; María Eliecer Cano García; María Siller Ruiz and SeqCOVID-SPAIN consortium; Mónica Gozalo Margüello                                                                                                                                                                                                                                    |
| EPI_ISL_538690 to 538722, EPI_ISL_538724 to 538736, EPI_ISL_538738 to 538747, EPI_ISL_582091, EPI_ISL_582093 to 582094, EPI_ISL_582097 to 582105, EPI_ISL_582108 to 582109, EPI_ISL_871893, EPI_ISL_871896, EPI_ISL_871911                                                                                                                                                                                                                                                                                                                                                                                                                                             |                                                                                     |                                                                         |                                                                                                                                                                                                                                                                                                                                                                                                                |
| see above                                                                                                                                                                                                                                                                                                                                                                                                                                                                                                                                                                                                                                                              | Hospital Universitario Marqués de Valdecilla - IDIVAL (Santander, Cantabria)        | SeqCOVID-SPAIN consortium/IBV(CSIC)                                     | Daniel Pablo Marcos; Jesús Rodríguez Rodríguez; Jose Manuel Méndez Legaza; María Eliecer Cano García; María Siller Ruiz and SeqCOVID-SPAIN consortium; Mónica Gozalo Margüello                                                                                                                                                                                                                                 |
| EPI_ISL_539503 to 539508, EPI_ISL_539513 to 539519, EPI_ISL_578189, EPI_ISL_578193, EPI_ISL_871978, EPI_ISL_871980 to 871983                                                                                                                                                                                                                                                                                                                                                                                                                                                                                                                                           | Hospital Universitario Miguel Servet                                                | Instituto de Salud Carlos III                                           | A. Monzón; A. Rezusta; F. Casas; I; I. Jiménez; I. Rezusta, A.; Iglesias-Caballero; M. Camarero; M. Cuesta; M. González-Esguevillas; M. Molinero Calamita; M. Pozo; M. Zaballos; P. Jiménez; R. Benito; S. Juliá; S. Molinero Calamita; S. Pozo; S. Varona                                                                                                                                                     |
| EPI_ISL_691731                                                                                                                                                                                                                                                                                                                                                                                                                                                                                                                                                                                                                                                         | Hospital Universitario Puerta de Hierro                                             | Instituto de Salud Carlos III                                           | A. Monzón; F. Casas; I. Jiménez; I. Velasco, A.; Iglesias-Caballero; M. Camarero; M. Cuesta; M. González-Esguevillas; M. Pozo; M. Zaballos; P. Jiménez; S. Juliá; S. Molinero Calamita; S. Varona                                                                                                                                                                                                              |
| EPI_ISL_452453 to 452457, EPI_ISL_452459 to 452471, EPI_ISL_467064 to 467066, EPI_ISL_467068 to 467085                                                                                                                                                                                                                                                                                                                                                                                                                                                                                                                                                                 | Hospital Universitario Puerta del Mar de Cádiz - INIBICA                            | SeqCOVID-SPAIN consortium/IBV(CSIC)                                     | Fátima-Galán-Sánchez; Manuel Rodríguez-Iglesias and SeqCOVID-SPAIN consortium; Manuel Rodrí-guez-Iglesias and SeqCOVID-SPAIN consortium; Salud Rodríguez-Pallares                                                                                                                                                                                                                                              |
| EPI_ISL_530094 to 530099                                                                                                                                                                                                                                                                                                                                                                                                                                                                                                                                                                                                                                               | Hospital Universitario Ramón y Cajal                                                | Hospital Universitario 12 de Octubre                                    | Elias Dahdouh; Esther Viedma; Fernando Lázaro; Jesús Mingorance; Juan Carlos Galán; Julio García; Mª Dolores Folgueira; Natalia Stella; Rafael Cantón; Rafael Delgado; Raúl Recio; Sara González                                                                                                                                                                                                               |
| EPI_ISL_417979 to 417981, EPI_ISL_530100 to 530119, EPI_ISL_534334                                                                                                                                                                                                                                                                                                                                                                                                                                                                                                                                                                                                     | Hospital Universitario Ramón y Cajal                                                | Hospital Universitario La Paz                                           | Elias Dahdouh; Esther Viedma; Fernando Lázaro; Jesús Mingorance; Juan Carlos Galán; Julio García; Ma Dolores Folgueira; María Rodríguez; Mª Dolores Folgueira; Natalia Stella; Rafael Cantón; Rafael Delgado; Raúl Recio; Sara González                                                                                                                                                                        |
| EPI_ISL_691729 to 691730, EPI_ISL_871973, EPI_ISL_871984, EPI_ISL_871991                                                                                                                                                                                                                                                                                                                                                                                                                                                                                                                                                                                               | Hospital Universitario Severo Ochoa                                                 | Instituto de Salud Carlos III                                           | A. Monzón; F. Casas; I. García; I. García, M.; I. Jiménez; Iglesias-Caballero; M. Camarero; M. Cuesta; M. González-Esguevillas; M. Pozo; M. Zaballos; M.L.; P. Jiménez; S. Juliá; S. Molinero Calamita; S. Varona                                                                                                                                                                                              |
| EPI_ISL_862545, EPI_ISL_862549, EPI_ISL_862568                                                                                                                                                                                                                                                                                                                                                                                                                                                                                                                                                                                                                         | Hospital Universitario Virgen de la Arrixaca                                        | Instituto de Salud Carlos III                                           | A. Monzón; F. Casas; I; I. Jiménez; Iglesias-Caballero; M. Camarero; M. Cuesta; M. González-Esguevillas; M. Pozo; M. Zaballos; Moreno, A.; P. Jiménez; S. Juliá; S. Molinero Calamita; S. Varona                                                                                                                                                                                                               |
| EPI_ISL_419230                                                                                                                                                                                                                                                                                                                                                                                                                                                                                                                                                                                                                                                         | Hospital Universitario Virgen de las Nieves                                         | Instituto de Salud Carlos III                                           | Camarero, S.; Casas, I.; Cuesta, I.; González-Esguevillas, M.; Iglesias-Caballero, M.; Jiménez, M.; Jiménez, P.; Juliá, M.; Molinero Calamita, M.; Monzón, S.; Pozo, F.; Sanbonmatsu, S.; Varona, S.; Zaballos, A.                                                                                                                                                                                             |
| EPI_ISL_467059 to 467063, EPI_ISL_474797, EPI_ISL_474832 to 474836, EPI_ISL_474841 to 474846, EPI_ISL_474850 to 474852, EPI_ISL_474854 to 474900, EPI_ISL_474907, EPI_ISL_474909, EPI_ISL_474920, EPI_ISL_474922 to 474932, EPI_ISL_474934 to 474939, EPI_ISL_474942 to 474943, EPI_ISL_474948 to 474950, EPI_ISL_474957, EPI_ISL_500160 to 500161, EPI_ISL_500163 to 500165, EPI_ISL_500169 to 500170, EPI_ISL_500172 to 500176, EPI_ISL_500178 to 500199, EPI_ISL_500201 to 500206, EPI_ISL_500208, EPI_ISL_500210 to 500216, EPI_ISL_500220, EPI_ISL_500222 to 500227, EPI_ISL_510424 to 510425, EPI_ISL_510427 to 510460, EPI_ISL_538672 to 538689, EPI_ISL_654626 |                                                                                     |                                                                         |                                                                                                                                                                                                                                                                                                                                                                                                                |
| see above                                                                                                                                                                                                                                                                                                                                                                                                                                                                                                                                                                                                                                                              | Hospital Universitario Virgen de las Nieves de Granada-SAS                          | SeqCOVID-SPAIN consortium/IBV(CSIC)                                     | Irene Pedrosa Corral; José M. Navarro-Marí and SeqCOVID-SPAIN consortium; Mercedes Pérez Ruiz; Sara Sanbonmatsu Gámez                                                                                                                                                                                                                                                                                          |
| EPI_ISL_419233, EPI_ISL_455325, EPI_ISL_539532                                                                                                                                                                                                                                                                                                                                                                                                                                                                                                                                                                                                                         | Hospital Universitario de Canarias                                                  | Instituto de Salud Carlos III                                           | A. Monzón; B. Castro; Camarero, S.; Casas, I.; Castro, B.; Cuesta, I.; F. Casas; González-Esguevillas, M.; I; I. Jiménez; Iglesias-Caballero; Iglesias-Caballero, M.; Jiménez, M.; Jiménez, P.; Juliá, M.; M. Camarero; M. Cuesta; M. González-Esguevillas; M. Molinero Calamita; M. Zaballos; Molinero Calamita, M.; Monzón, S.; P. Jiménez; Pozo, F.; S. Juliá; S. Pozo; S. Varona; Varona, S.; Zaballos, A. |
| EPI_ISL_539520 to 539522, EPI_ISL_691686 to 691699, EPI_ISL_862655 to 862658, EPI_ISL_871995                                                                                                                                                                                                                                                                                                                                                                                                                                                                                                                                                                           | Hospital Universitario de Ceuta                                                     | Instituto de Salud Carlos III                                           | A. Monzón; F. Casas; G. Sánchez; I; I. Hijano, S.; I. Jiménez; Iglesias-Caballero; J. López; M. Camarero; M. Cuesta; M. González-Esguevillas; M. Molinero Calamita; M. Pozo; M. Zaballos; P. Jiménez; S. Juliá; S. Molinero Calamita; S. Pozo; S. Varona                                                                                                                                                       |
| EPI_ISL_467086 to 467091, EPI_ISL_474910 to 474918, EPI_ISL_537691 to 537728, EPI_ISL_537788 to 537796, EPI_ISL_537798 to 537799, EPI_ISL_537801 to 537808, EPI_ISL_561370 to 561372, EPI_ISL_660600                                                                                                                                                                                                                                                                                                                                                                                                                                                                   |                                                                                     |                                                                         |                                                                                                                                                                                                                                                                                                                                                                                                                |
| see above                                                                                                                                                                                                                                                                                                                                                                                                                                                                                                                                                                                                                                                              | Hospital Universitario de Gran Canaria Dr. Negrín                                   | SeqCOVID-SPAIN consortium/IBV(CSIC)                                     | Ana Bordes Benítez and SeqCOVID-SPAIN consortium; Francisco J. Chamizo López; M. Carmen Pérez González                                                                                                                                                                                                                                                                                                         |
| EPI_ISL_539246 to 539247, EPI_ISL_539249, EPI_ISL_539251 to 539258, EPI_ISL_539262, EPI_ISL_539264, EPI_ISL_539266 to 539267, EPI_ISL_539270, EPI_ISL_539272 to 539283                                                                                                                                                                                                                                                                                                                                                                                                                                                                                                 |                                                                                     |                                                                         |                                                                                                                                                                                                                                                                                                                                                                                                                |
| see above                                                                                                                                                                                                                                                                                                                                                                                                                                                                                                                                                                                                                                                              | Hospital Universitario de La Ribera (Alzira, València)                              | SeqCOVID-SPAIN consortium/IBV(CSIC)                                     | Julia González and SeqCOVID-SPAIN consortium; Olalla Martínez Macias                                                                                                                                                                                                                                                                                                                                           |
| EPI_ISL_693516, EPI_ISL_693518 to 693520, EPI_ISL_693523 to 693524, EPI_ISL_693534 to 693536, EPI_ISL_693630 to 693657                                                                                                                                                                                                                                                                                                                                                                                                                                                                                                                                                 | Hospital Vila Franca de Xira                                                        | Instituto Nacional de Saude (INSA)                                      | Borges et al                                                                                                                                                                                                                                                                                                                                                                                                   |
| EPI_ISL_455315 to 455322, EPI_ISL_455324, EPI_ISL_539497 to 539498, EPI_ISL_578187 to 578188                                                                                                                                                                                                                                                                                                                                                                                                                                                                                                                                                                           | Hospital Virgen de las Nieves                                                       | Instituto de Salud Carlos III                                           | A. Monzón; F. Casas; I; I. Jiménez; Iglesias-Caballero; J. Lepe; J.M Navarro; M. Camarero; M. Cuesta; M. González-Esguevillas; M. Molinero Calamita; M. Zaballos; P. Jiménez; S. Juliá; S. Pozo; S. Sanbonmatsu; S. Varona                                                                                                                                                                                     |
| EPI_ISL_455314, EPI_ISL_455323                                                                                                                                                                                                                                                                                                                                                                                                                                                                                                                                                                                                                                         | Hospital Virgen del Rocío                                                           | Instituto de Salud Carlos III                                           | A. Monzón; F. Casas; I; I. Jiménez; Iglesias-Caballero; J. Lepe; M. Camarero; M. Cuesta; M. González-Esguevillas; M. Molinero Calamita; M. Zaballos; P. Jiménez; S. Juliá; S. Pozo; S. Varona                                                                                                                                                                                                                  |
| EPI_ISL_511577                                                                                                                                                                                                                                                                                                                                                                                                                                                                                                                                                                                                                                                         | Hospital de Braga                                                                   | Instituto Nacional de Saude (INSA)                                      | Borges et al                                                                                                                                                                                                                                                                                                                                                                                                   |
| EPI_ISL_455352 to 455354                                                                                                                                                                                                                                                                                                                                                                                                                                                                                                                                                                                                                                               | Hospital de Cruces                                                                  | Instituto de Salud Carlos III                                           | A. Monzón; F. Casas; I; I. Jiménez; Iglesias-Caballero; M. Aranzamendi; M. Camarero; M. Cuesta; M. González-Esguevillas; M. Molinero Calamita; M. Zaballos; P. Jiménez; S. Juliá; S. Pozo; S. Varona                                                                                                                                                                                                           |
| EPI_ISL_691685                                                                                                                                                                                                                                                                                                                                                                                                                                                                                                                                                                                                                                                         | Hospital de Leon                                                                    | Instituto de Salud Carlos III                                           | A. Monzón; F. Casas; I. Jiménez; I. Vidan, J.; Iglesias-Caballero; M. Camarero; M. Cuesta; M. González-Esguevillas; M. Pozo; M. Zaballos; P. Jiménez; S. Juliá; S. Molinero Calamita; S. Varona                                                                                                                                                                                                                |
| EPI_ISL_691732, EPI_ISL_871994                                                                                                                                                                                                                                                                                                                                                                                                                                                                                                                                                                                                                                         | Hospital de Madrid                                                                  | Instituto de Salud Carlos III                                           | A. Monzón; F. Casas; I. Alhambra, A.; I. Jiménez; Iglesias-Caballero; M. Camarero; M. Cuesta; M. González-Esguevillas; M. Pozo; M. Zaballos; P. Jiménez; S. Juliá; S. Molinero Calamita; S. Varona                                                                                                                                                                                                             |
| EPI_ISL_850508                                                                                                                                                                                                                                                                                                                                                                                                                                                                                                                                                                                                                                                         | Hospital de Tortosa Verge de la Cinta                                               | Hospital Universitari Vall d'Hebron - Vall d'Hebron Institut de Recerca | Andrés Antón; Ariadna Rando; Carla Castillo; Cristina Andrés; Damir García-Cehic; Josep F Abriú; Josep Quer; Juliana Esperalba; María Carmen Martín; María Gema Codina; María Piñana; Tomás Pumarola                                                                                                                                                                                                           |
| EPI_ISL_510247 to 510267, EPI_ISL_671807, EPI_ISL_671809 to 671810, EPI_ISL_671815, EPI_ISL_671826, EPI_ISL_671829 to 671830, EPI_ISL_671833                                                                                                                                                                                                                                                                                                                                                                                                                                                                                                                           |                                                                                     |                                                                         |                                                                                                                                                                                                                                                                                                                                                                                                                |

|                                                                                                                                                                                                                                                                                                                                                                                                                                                                                                                                                                                                                                                                                                                                                  |                                                                                |                                                                                                         |                                                                                                                                                                                                                                                                                                                                                                                                                                                                                                                                                                                                                                                            |
|--------------------------------------------------------------------------------------------------------------------------------------------------------------------------------------------------------------------------------------------------------------------------------------------------------------------------------------------------------------------------------------------------------------------------------------------------------------------------------------------------------------------------------------------------------------------------------------------------------------------------------------------------------------------------------------------------------------------------------------------------|--------------------------------------------------------------------------------|---------------------------------------------------------------------------------------------------------|------------------------------------------------------------------------------------------------------------------------------------------------------------------------------------------------------------------------------------------------------------------------------------------------------------------------------------------------------------------------------------------------------------------------------------------------------------------------------------------------------------------------------------------------------------------------------------------------------------------------------------------------------------|
| see above                                                                                                                                                                                                                                                                                                                                                                                                                                                                                                                                                                                                                                                                                                                                        | Hospital de la Santa Creu i Sant Pau. Servicio de Microbiología                | SeqCOVID-SPAIN consortium/IBV(CSIC)                                                                     | Elisenda Miró and SeqCOVID-SPAIN consortium; Ferran Navarro; Núria Rabella                                                                                                                                                                                                                                                                                                                                                                                                                                                                                                                                                                                 |
| EPI_ISL_541067 to 541076, EPI_ISL_541078 to 541081                                                                                                                                                                                                                                                                                                                                                                                                                                                                                                                                                                                                                                                                                               | Hospital de la Santa Creu i Sant Pau. Servicio de Microbiología                | SeqCOVID-SPAIN consortium/Institute of Biomedicine of Valencia, IBV-CSIC                                | Elisenda Miró and SeqCOVID-SPAIN consortium; Ferran Navarro; Núria Rabella                                                                                                                                                                                                                                                                                                                                                                                                                                                                                                                                                                                 |
| EPI_ISL_417486 to 417487, EPI_ISL_420147, EPI_ISL_471173, EPI_ISL_471176, EPI_ISL_493384, EPI_ISL_500775, EPI_ISL_500791 to 500792, EPI_ISL_500797 to 500799, EPI_ISL_549036 to 549037, EPI_ISL_549052, EPI_ISL_549167, EPI_ISL_590904 to 590907, EPI_ISL_590915, EPI_ISL_590936 to 590937, EPI_ISL_590984, EPI_ISL_635097, EPI_ISL_635121 to 635123, EPI_ISL_635138, EPI_ISL_635143, EPI_ISL_635161, EPI_ISL_635189, EPI_ISL_668394 to 668395, EPI_ISL_668427 to 668428, EPI_ISL_708055 to 708056, EPI_ISL_708122 to 708125, EPI_ISL_759976, EPI_ISL_775285, EPI_ISL_775371, EPI_ISL_775518 to 775522, EPI_ISL_796664, EPI_ISL_796688, EPI_ISL_796714 to 796716, EPI_ISL_796729, EPI_ISL_813977, EPI_ISL_860214, EPI_ISL_860222, EPI_ISL_860236 |                                                                                |                                                                                                         |                                                                                                                                                                                                                                                                                                                                                                                                                                                                                                                                                                                                                                                            |
| see above                                                                                                                                                                                                                                                                                                                                                                                                                                                                                                                                                                                                                                                                                                                                        | Hospital of Southern Norway - Kristiansand, Department of Medical Microbiology | Norwegian Institute of Public Health, Department of Virology                                            | Atiya R Ali; Hilde Elshaug; Hilde Synnøve Vollen; Hilde Vollen; Kamilla Heddeland Instefjord; Karoline Bragstad; Kathrine Stene-Johansen; Marie Paulsen Madsen; Olav Hungnes; Rasmus Riis Kopperud                                                                                                                                                                                                                                                                                                                                                                                                                                                         |
| EPI_ISL_593915                                                                                                                                                                                                                                                                                                                                                                                                                                                                                                                                                                                                                                                                                                                                   | Hospital, Amneville                                                            | National Reference Center for Viruses of Respiratory Infections, Institut Pasteur, Paris                | Etienne Simon-Lorière; Fabiana Gambaro; Maud Vanpeene; Sylvie Behillil; Sylvie van der Werf; Vincent Enouf                                                                                                                                                                                                                                                                                                                                                                                                                                                                                                                                                 |
| EPI_ISL_593903                                                                                                                                                                                                                                                                                                                                                                                                                                                                                                                                                                                                                                                                                                                                   | Hospital, Argenteuil                                                           | National Reference Center for Viruses of Respiratory Infections, Institut Pasteur, Paris                | Etienne Simon-Lorière; Fabiana Gambaro; Maud Vanpeene; Sylvie Behillil; Sylvie van der Werf; Vincent Enouf                                                                                                                                                                                                                                                                                                                                                                                                                                                                                                                                                 |
| EPI_ISL_593910                                                                                                                                                                                                                                                                                                                                                                                                                                                                                                                                                                                                                                                                                                                                   | Hospital, Boulogne-Billancourt                                                 | National Reference Center for Viruses of Respiratory Infections, Institut Pasteur, Paris                | Etienne Simon-Lorière; Fabiana Gambaro; Maud Vanpeene; Sylvie Behillil; Sylvie van der Werf; Vincent Enouf                                                                                                                                                                                                                                                                                                                                                                                                                                                                                                                                                 |
| EPI_ISL_593921                                                                                                                                                                                                                                                                                                                                                                                                                                                                                                                                                                                                                                                                                                                                   | Hospital, Fameck                                                               | National Reference Center for Viruses of Respiratory Infections, Institut Pasteur, Paris                | Etienne Simon-Lorière; Fabiana Gambaro; Maud Vanpeene; Sylvie Behillil; Sylvie van der Werf; Vincent Enouf                                                                                                                                                                                                                                                                                                                                                                                                                                                                                                                                                 |
| EPI_ISL_593918                                                                                                                                                                                                                                                                                                                                                                                                                                                                                                                                                                                                                                                                                                                                   | Hospital, Joeuf                                                                | National Reference Center for Viruses of Respiratory Infections, Institut Pasteur, Paris                | Etienne Simon-Lorière; Fabiana Gambaro; Maud Vanpeene; Sylvie Behillil; Sylvie van der Werf; Vincent Enouf                                                                                                                                                                                                                                                                                                                                                                                                                                                                                                                                                 |
| EPI_ISL_593911                                                                                                                                                                                                                                                                                                                                                                                                                                                                                                                                                                                                                                                                                                                                   | Hospital, Le Chesnay Cédex                                                     | National Reference Center for Viruses of Respiratory Infections, Institut Pasteur, Paris                | Etienne Simon-Lorière; Fabiana Gambaro; Maud Vanpeene; Sylvie Behillil; Sylvie van der Werf; Vincent Enouf                                                                                                                                                                                                                                                                                                                                                                                                                                                                                                                                                 |
| EPI_ISL_593922 to 593923                                                                                                                                                                                                                                                                                                                                                                                                                                                                                                                                                                                                                                                                                                                         | Hospital, Maizières les Metz                                                   | National Reference Center for Viruses of Respiratory Infections, Institut Pasteur, Paris                | Etienne Simon-Lorière; Fabiana Gambaro; Maud Vanpeene; Sylvie Behillil; Sylvie van der Werf; Vincent Enouf                                                                                                                                                                                                                                                                                                                                                                                                                                                                                                                                                 |
| EPI_ISL_593912                                                                                                                                                                                                                                                                                                                                                                                                                                                                                                                                                                                                                                                                                                                                   | Hospital, Marange Silvang                                                      | National Reference Center for Viruses of Respiratory Infections, Institut Pasteur, Paris                | Etienne Simon-Lorière; Fabiana Gambaro; Maud Vanpeene; Sylvie Behillil; Sylvie van der Werf; Vincent Enouf                                                                                                                                                                                                                                                                                                                                                                                                                                                                                                                                                 |
| EPI_ISL_593914, EPI_ISL_593920                                                                                                                                                                                                                                                                                                                                                                                                                                                                                                                                                                                                                                                                                                                   | Hospital, Metz                                                                 | National Reference Center for Viruses of Respiratory Infections, Institut Pasteur, Paris                | Etienne Simon-Lorière; Fabiana Gambaro; Maud Vanpeene; Sylvie Behillil; Sylvie van der Werf; Vincent Enouf                                                                                                                                                                                                                                                                                                                                                                                                                                                                                                                                                 |
| EPI_ISL_593917                                                                                                                                                                                                                                                                                                                                                                                                                                                                                                                                                                                                                                                                                                                                   | Hospital, Montigny les Metz                                                    | National Reference Center for Viruses of Respiratory Infections, Institut Pasteur, Paris                | Etienne Simon-Lorière; Fabiana Gambaro; Maud Vanpeene; Sylvie Behillil; Sylvie van der Werf; Vincent Enouf                                                                                                                                                                                                                                                                                                                                                                                                                                                                                                                                                 |
| EPI_ISL_593919                                                                                                                                                                                                                                                                                                                                                                                                                                                                                                                                                                                                                                                                                                                                   | Hospital, Ottonville                                                           | National Reference Center for Viruses of Respiratory Infections, Institut Pasteur, Paris                | Etienne Simon-Lorière; Fabiana Gambaro; Maud Vanpeene; Sylvie Behillil; Sylvie van der Werf; Vincent Enouf                                                                                                                                                                                                                                                                                                                                                                                                                                                                                                                                                 |
| EPI_ISL_593916                                                                                                                                                                                                                                                                                                                                                                                                                                                                                                                                                                                                                                                                                                                                   | Hospital, Sarreguemines                                                        | National Reference Center for Viruses of Respiratory Infections, Institut Pasteur, Paris                | Etienne Simon-Lorière; Fabiana Gambaro; Maud Vanpeene; Sylvie Behillil; Sylvie van der Werf; Vincent Enouf                                                                                                                                                                                                                                                                                                                                                                                                                                                                                                                                                 |
| EPI_ISL_593913                                                                                                                                                                                                                                                                                                                                                                                                                                                                                                                                                                                                                                                                                                                                   | Hospital, Talange                                                              | National Reference Center for Viruses of Respiratory Infections, Institut Pasteur, Paris                | Etienne Simon-Lorière; Fabiana Gambaro; Maud Vanpeene; Sylvie Behillil; Sylvie van der Werf; Vincent Enouf                                                                                                                                                                                                                                                                                                                                                                                                                                                                                                                                                 |
| EPI_ISL_450819, EPI_ISL_469059, EPI_ISL_469068                                                                                                                                                                                                                                                                                                                                                                                                                                                                                                                                                                                                                                                                                                   | Hovas Askim Familjelakare och BVC                                              | The Public Health Agency of Sweden                                                                      | Anna Risberg; Anna Wendel; Anna-Malin Linde; Karin Tegmark-Wisell; Maria Lind Karlberg; Mattias Haukland; Mia Brytting; Olov Svartstrom; Oskar Karlsson Lindsjo; Petra Edquist; Reza Advani; Sandra Broddesson; Shamam Muradrasoli; Theresa Enkirch                                                                                                                                                                                                                                                                                                                                                                                                        |
| EPI_ISL_452237, EPI_ISL_452240, EPI_ISL_469062, EPI_ISL_469064 to 469065, EPI_ISL_475513, EPI_ISL_475522 to 475523, EPI_ISL_475525, EPI_ISL_475567                                                                                                                                                                                                                                                                                                                                                                                                                                                                                                                                                                                               |                                                                                |                                                                                                         |                                                                                                                                                                                                                                                                                                                                                                                                                                                                                                                                                                                                                                                            |
| see above                                                                                                                                                                                                                                                                                                                                                                                                                                                                                                                                                                                                                                                                                                                                        | Huddinge VC                                                                    | The Public Health Agency of Sweden                                                                      | Anders Johansson; Anna Risberg; Anna-Malin Linde; Karin Tegmark-Wisell; Maria Lind Karlberg; Mattias Haukland; Mia Brytting; Olov Svartstrom; Oskar Karlsson Lindsjo; Petra Edquist; Reza Advani; Sandra Broddesson; Shamam Muradrasoli; Theresa Enkirch                                                                                                                                                                                                                                                                                                                                                                                                   |
| EPI_ISL_645000 to 645014, EPI_ISL_645016 to 645028, EPI_ISL_645030 to 645104, EPI_ISL_645106 to 645109                                                                                                                                                                                                                                                                                                                                                                                                                                                                                                                                                                                                                                           | Human Genome Variation Research Group, Malopolska Centre of Biotechnology      | Human Genome Variation Research Group, Malopolska Centre of Biotechnology                               | Botwina, P.; Branicki, W.; Dabrowska, A.; Foremny, J.; Gromowski, T.; Klajmon, A.; Kopera, K.; Kowalski, M.; Labaj; Marszalek, K.; Owczarek, K.; P.P.; Pisarek, A.; Pospiech, E.; Pyrc, K.; Sanak, M.; Swadzba, J.; Szczepanski, A.                                                                                                                                                                                                                                                                                                                                                                                                                        |
| EPI_ISL_526215 to 526238                                                                                                                                                                                                                                                                                                                                                                                                                                                                                                                                                                                                                                                                                                                         | Hungarian Defence Forces Military Medical Centre                               | National Laboratory of Virology, Szentágotthai Research Centre                                          | Balázs Somogyi; Bálint Eszenyi; Endre Gábor Tóth; Ferenc Jakab; Gábor Kemenesi                                                                                                                                                                                                                                                                                                                                                                                                                                                                                                                                                                             |
| EPI_ISL_450814, EPI_ISL_452241, EPI_ISL_455103                                                                                                                                                                                                                                                                                                                                                                                                                                                                                                                                                                                                                                                                                                   | Huslakarna Varmbadhuset Varberg                                                | The Public Health Agency of Sweden                                                                      | Anna Risberg; Anna-Malin Linde; Johanna Hilmersson; Karin Tegmark-Wisell; Maria Lind Karlberg; Mia Brytting; Olov Svartstrom; Oskar Karlsson Lindsjo; Theresa Enkirch                                                                                                                                                                                                                                                                                                                                                                                                                                                                                      |
| EPI_ISL_833191 to 833200                                                                                                                                                                                                                                                                                                                                                                                                                                                                                                                                                                                                                                                                                                                         | Hôpital Bichat Claude Bernard, Laboratoire de Virologie                        | IAME UMR1137 Inserm, Université de Paris, Hôpital Bichat                                                | Alexandre Storto; Amélie Recoing; Antoine Bridier; Benoit Visseaux; Charlotte Charpentier; Diane Descamps; Gilles Collin; Lena Daniel; Mélanie Bertine; Nadhira Houhou-Fidouh; Quentin Le Hingrat; Siham Hamri                                                                                                                                                                                                                                                                                                                                                                                                                                             |
| EPI_ISL_447654 to 447655, EPI_ISL_447657 to 447733                                                                                                                                                                                                                                                                                                                                                                                                                                                                                                                                                                                                                                                                                               | Hôpital Henri-Mondor Ap-Hp                                                     | Hôpital Henri-Mondor Ap-Hp                                                                              | Canoui-Poitrine, F.; Clinical Study Group, C.; De Prost, N.; Demontant, V.; Deveaux, I.; Fourati, S.; Gricourt, G.; J.-M.; Lamoureux, C.; Lepeule, R.; Mekontso-Dessap, A.; N'debi, M.; P.-L.; Pawlotsky; Picard, O.; Rodriguez, C.; Schmitz, D.; Surgers, L.; Trawinski, E.; Woerther                                                                                                                                                                                                                                                                                                                                                                     |
| EPI_ISL_415650                                                                                                                                                                                                                                                                                                                                                                                                                                                                                                                                                                                                                                                                                                                                   | Hôpital Instruction des Armées - BEGIN                                         | National Reference Center for Viruses of Respiratory Infections, Institut Pasteur, Paris                | Angela Brisebarre; Christine Bigaillon; Flora Donati Vincent Enouf; Marion Barbet; Maud Vanpeene; Méline Bizard; Mélinie Albert; Sylvie Behillil; Sylvie van der Werf                                                                                                                                                                                                                                                                                                                                                                                                                                                                                      |
| EPI_ISL_443295 to 443299                                                                                                                                                                                                                                                                                                                                                                                                                                                                                                                                                                                                                                                                                                                         | Hôpital Necker - Enfants - Malades Laboratoire de Virologie                    | National Reference Center for Viruses of Respiratory Infections, Institut Pasteur, Paris                | Angela Brisebarre; Etienne Simon-Lorière; Flora Donati; Marianne Lueruz-Ville; Marion Barbet; Maud Vanpeene; Mélanie Albert; Méline Bizard; Sylvie Behillil; Sylvie van der Werf; Vincent Enouf                                                                                                                                                                                                                                                                                                                                                                                                                                                            |
| EPI_ISL_414631 to 414632                                                                                                                                                                                                                                                                                                                                                                                                                                                                                                                                                                                                                                                                                                                         | Hôpital Robert Debré Laboratoire de Virologie                                  | National Reference Center for Viruses of Respiratory Infections, Institut Pasteur, Paris                | Angela Brisebarre; Flora Donati Vincent Enouf; Laurent Andreoletti; Marion Barbet; Maud Vanpeene; Méline Bizard; Mélinie Albert; Sylvie Behillil; Sylvie van der Werf                                                                                                                                                                                                                                                                                                                                                                                                                                                                                      |
| EPI_ISL_768829                                                                                                                                                                                                                                                                                                                                                                                                                                                                                                                                                                                                                                                                                                                                   | Hôpital d'Instruction des Armées Sainte-Anne                                   | CNR Virus des Infections Respiratoires - France SUD                                                     | Antonin Bal; Bruno Lina; Gregory Destras; Gwendolynne Burfin; Hadrien Régue; Laurence Josset; Martine Valette; Quentin Semanas                                                                                                                                                                                                                                                                                                                                                                                                                                                                                                                             |
| EPI_ISL_649785, EPI_ISL_649938 to 649939, EPI_ISL_653763 to 653783, EPI_ISL_653787 to 653812, EPI_ISL_653814 to 653823, EPI_ISL_722851 to 722854, EPI_ISL_722859 to 722871, EPI_ISL_722895, EPI_ISL_722898, EPI_ISL_722900                                                                                                                                                                                                                                                                                                                                                                                                                                                                                                                       |                                                                                |                                                                                                         |                                                                                                                                                                                                                                                                                                                                                                                                                                                                                                                                                                                                                                                            |
| see above                                                                                                                                                                                                                                                                                                                                                                                                                                                                                                                                                                                                                                                                                                                                        | I.R.C.C.S. "S. De Bellis" - Ente Ospedaliero                                   | Istituto Zooprofilattico Sperimentale della Puglia e della Basilicata                                   | Bianco A.; Capozzi L.; Cipolletta D.; Del Sambio L.; Galante D.; Lippolis A.; Manzulli V.; Notarnicola M.; Pace L.; Parisi A.; Rondonone V.                                                                                                                                                                                                                                                                                                                                                                                                                                                                                                                |
| EPI_ISL_853854 to 853855, EPI_ISL_853914, EPI_ISL_853924 to 853928                                                                                                                                                                                                                                                                                                                                                                                                                                                                                                                                                                                                                                                                               | ILV Kärnten                                                                    | Berghthaler laboratory, CeMM Research Center for Molecular Medicine of the Austrian Academy of Sciences | Alexander Lercher; Alexandra Popa; Andreas Berghthaler; Anna Schedl; Benedikt Agerer; Christoph Bock; Jakob-Wendelin Genger; Jan Laine; Lukas Endler; Martin Senekowitsch; Michael Schuster; Thomas Penz                                                                                                                                                                                                                                                                                                                                                                                                                                                   |
| EPI_ISL_419255, EPI_ISL_493328 to 493331, EPI_ISL_590693 to 590698, EPI_ISL_603137 to 603187, EPI_ISL_609989 to 609999, EPI_ISL_882924 to 882925, EPI_ISL_913448, EPI_ISL_983323                                                                                                                                                                                                                                                                                                                                                                                                                                                                                                                                                                 |                                                                                |                                                                                                         |                                                                                                                                                                                                                                                                                                                                                                                                                                                                                                                                                                                                                                                            |
| see above                                                                                                                                                                                                                                                                                                                                                                                                                                                                                                                                                                                                                                                                                                                                        | INMI Lazzaro Spallanzani IRCCS                                                 | INMI Lazzaro Spallanzani IRCCS                                                                          | A Di Caro; Annunziata Tamburro; Antonino Di Caro; B Bartolini; Barbara Bartolini; Beatrice Valli; C.E.M Gruber; CEM Gruber; Cesare E. M. Gruber; Cesare E.M. Gruber; Cesare EM Gruber; Concetta Castilletti; Daniele Lapa; E Giombini; Eleonora Lalle; Emanuela Giombini; F Messina; Fabrizio Carletti; Francesca Colavita; Francesco Messina; Francesco Vairo; Fulvia Pimpinelli; Giuseppe Ippolito.; Giuseppe Cappiello; M Rueca; MR Capobianchi; Marcello Meledandri; Maria Letizia Schiavone; Maria R. Capobianchi; Maria R. Capobianchi; Mariarosa Gaudio; Martina Rueca; O Butera; Ornella Butera; Patrizia Massarelli; Silvia Meschi; Simone Lanini |
| EPI_ISL_410545 to 410546, EPI_ISL_417921 to                                                                                                                                                                                                                                                                                                                                                                                                                                                                                                                                                                                                                                                                                                      | INMI Lazzaro Spallanzani IRCCS                                                 | Laboratory of Virology, INMI Lazzaro Spallanzani IRCCS                                                  | Antonino Di Caro; Barbara Bartolini; Cesare E. M. Gruber; Cesare Ernesto Maria Gruber; Concetta Castilletti; Daniele Lapa; Eleonora Lalle; Emanuela                                                                                                                                                                                                                                                                                                                                                                                                                                                                                                        |

|                                                                                                                                                                                                                                                                                                                                                                                                  |                                                                                                        |                                                                                                                         |                                                                                                                                                                                                                                                                                                                                                                                                                                                                                                                                                                                                                   |
|--------------------------------------------------------------------------------------------------------------------------------------------------------------------------------------------------------------------------------------------------------------------------------------------------------------------------------------------------------------------------------------------------|--------------------------------------------------------------------------------------------------------|-------------------------------------------------------------------------------------------------------------------------|-------------------------------------------------------------------------------------------------------------------------------------------------------------------------------------------------------------------------------------------------------------------------------------------------------------------------------------------------------------------------------------------------------------------------------------------------------------------------------------------------------------------------------------------------------------------------------------------------------------------|
| 417923, EPI_ISL_419254, EPI_ISL_424342 to 424344                                                                                                                                                                                                                                                                                                                                                 |                                                                                                        |                                                                                                                         | Giombini; Emanuele Nicastri; Fabrizio Carletti; Francesca Colavita; Francesco Messina; Francesco Vairo; Giulia Matusali; Giuseppe Ippolito; Licia Bordi; Maria R. Capobianchi; Maria Rosaria Capobianchi; Martina Rueca                                                                                                                                                                                                                                                                                                                                                                                           |
| EPI_ISL_492184, EPI_ISL_493197, EPI_ISL_493213, EPI_ISL_494756 to 494757, EPI_ISL_494759, EPI_ISL_494761 to 494763, EPI_ISL_494771, EPI_ISL_494774 to 494776, EPI_ISL_775239 to 775240, EPI_ISL_775243 to 775244, EPI_ISL_775246, EPI_ISL_775257, EPI_ISL_775259, EPI_ISL_775261                                                                                                                 |                                                                                                        |                                                                                                                         |                                                                                                                                                                                                                                                                                                                                                                                                                                                                                                                                                                                                                   |
| see above                                                                                                                                                                                                                                                                                                                                                                                        | INT Fondazione Pascale                                                                                 | INT Fondazione Pascale                                                                                                  | INT Fondazione Pascale; Pascale                                                                                                                                                                                                                                                                                                                                                                                                                                                                                                                                                                                   |
| EPI_ISL_492980 to 492987, EPI_ISL_751318 to 751447                                                                                                                                                                                                                                                                                                                                               | IRCCS Sacro Cuore Don Calabria Hospital, Department of Infectious, Tropical Diseases & Microbiology    | University of Verona, Department of Biotechnology                                                                       | Antonio Mori; Chiara Degli Esposti; Chiara Piubelli; Cristina Beltrami; Elena Pomari; Emanuela Cosentino; Giulia Lopatriello; Luca Marcolungo; Massimo Delledonne; Michela Deiana                                                                                                                                                                                                                                                                                                                                                                                                                                 |
| EPI_ISL_480961, EPI_ISL_480975, EPI_ISL_480981, EPI_ISL_480989, EPI_ISL_480995, EPI_ISL_481003, EPI_ISL_481017, EPI_ISL_481025, EPI_ISL_481029, EPI_ISL_481034 to 481035                                                                                                                                                                                                                         |                                                                                                        |                                                                                                                         |                                                                                                                                                                                                                                                                                                                                                                                                                                                                                                                                                                                                                   |
| see above                                                                                                                                                                                                                                                                                                                                                                                        | ISGlobal, Institut de Salut Global de Barcelona                                                        | SeqCOVID-SPAIN consortium/IBV(CSIC)                                                                                     | Alberto L Garcia-Basteiro; Alfredo Mayor; Carlota Dobaño; Gemma Moncunill; Pau Cisteró and SeqCOVID-SPAIN consortium                                                                                                                                                                                                                                                                                                                                                                                                                                                                                              |
| EPI_ISL_833076                                                                                                                                                                                                                                                                                                                                                                                   | IZSAM                                                                                                  | Istituto Zooprofilattico Sperimentale dell'Abruzzo e Molise "G. Caporale"                                               | Ancora M; Calistri P; Cammà C; Curini V; Delli Compagni E; Di Domenico M; Di Pasquale A; Lorusso A; Mangone I; Marcacci M; Puglia I; Rinaldi A; Savini G                                                                                                                                                                                                                                                                                                                                                                                                                                                          |
| EPI_ISL_572320 to 572324, EPI_ISL_584069, EPI_ISL_584071 to 584072                                                                                                                                                                                                                                                                                                                               | IZSM                                                                                                   | IZSM                                                                                                                    | Giovanna Fusco; Lorena Cardillo; Maurizio Viscardi                                                                                                                                                                                                                                                                                                                                                                                                                                                                                                                                                                |
| EPI_ISL_900574 to 900690                                                                                                                                                                                                                                                                                                                                                                         | IZSM                                                                                                   | TIGEM                                                                                                                   |                                                                                                                                                                                                                                                                                                                                                                                                                                                                                                                                                                                                                   |
| EPI_ISL_738121 to 738132                                                                                                                                                                                                                                                                                                                                                                         | IZSM-U.O.C. Virologia                                                                                  | Istituto Zooprofilattico Sperimentale del Mezzogiorno                                                                   | Andrea Ballabio; Anna Manfredi; Antonio Grimaldi; Antonio Limone; Biancamaria Pierri; Chiara Colantuono; Davide Cacchiarelli.; Denise Di Concilio; Francesco Panariello; Lucio Di Filippo; Marcello Salvi; Maria Concetta Cuomo; Patrizia Annunziata; Pellegrino Cerino; Valentina Bouche                                                                                                                                                                                                                                                                                                                         |
| EPI_ISL_683657 to 683670, EPI_ISL_683672 to 683677, EPI_ISL_779715 to 779729, EPI_ISL_779738 to 779739, EPI_ISL_779741 to 779752, EPI_ISL_779754 to 779773, EPI_ISL_855402 to 855403, EPI_ISL_855405, EPI_ISL_855407                                                                                                                                                                             |                                                                                                        |                                                                                                                         | Giovanna Fusco; Lorena Cardillo; Maurizio Viscardi                                                                                                                                                                                                                                                                                                                                                                                                                                                                                                                                                                |
| see above                                                                                                                                                                                                                                                                                                                                                                                        | IdISSC/Hospital Clínico San Carlos de Madrid                                                           | SeqCOVID-SPAIN consortium/IBV(CSIC)                                                                                     | Alberto Delgado-Iribarren; Esther Culebras Lopez; Esther Culebras López; Jorge Matias-Guiú; Luis Ortega Medina; Silvia Sánchez Ramón; Ulises Gómez-Pinedo and SeqCOVID-SPAIN consortium; Vicente Estrada Pérez                                                                                                                                                                                                                                                                                                                                                                                                    |
| EPI_ISL_475572                                                                                                                                                                                                                                                                                                                                                                                   | Imperial College London                                                                                | Imperial College London                                                                                                 | Jie Zhou; Wendy Barclay                                                                                                                                                                                                                                                                                                                                                                                                                                                                                                                                                                                           |
| EPI_ISL_856712 to 856721                                                                                                                                                                                                                                                                                                                                                                         | Infectious Diseases Unit, Department of Internal Medicine, Azienda Ospedaliera-Universitaria di Padova | Laboratory of Infectious Diseases, Department of Biomedical and Clinical Sciences L. Sacco, University of Milan         | Alessia Lai; Anna Maria Cattelan; Annalisa Bergna; Carla Della Ventura; Claudia Balotta; Davide Leoni; Gianguglielmo Zehender on behalf of SARS-CoV-2 ITALIAN RESEARCH ENTERPRISE-(SCIRE) Collaborative Group; Lolita Sasset; Massimo Galli                                                                                                                                                                                                                                                                                                                                                                       |
| EPI_ISL_541970                                                                                                                                                                                                                                                                                                                                                                                   | Influenza Centre, University of Bergen                                                                 | Norwegian Institute of Public Health, Department of Virology                                                            | Bjørn Blomberg; Fan Zhou; Hilde Elshaug; Hilde Synnøve Vollan; Kamilla Heddeland Instefjord; Karl A Brokstad; Karoline Bragstad; Kathrine Stene-Johansen; Olav Hungnes; Rasmus Riis Kopperud; Rebecca J Cox                                                                                                                                                                                                                                                                                                                                                                                                       |
| EPI_ISL_470900 to 470904, EPI_ISL_872641 to 872642                                                                                                                                                                                                                                                                                                                                               | Influenza etiology and epidemiology laboratory                                                         | Pathogenic Microorganisms Variability Laboratory                                                                        | Alexander Gintsburg; Alexey Shchetinin; Andrei Siniavin; Andrey Botikov; Andrey Pochtovyy; Anna Ignatieva; Anna Ignatjeva; Daria Grousova; Denis Logunov; Elena Burtseva; Elena Shidlovskaya; Elizaveta Divisenko; Evgeniya Mukasheva; Evgeny Usachev; Inna Dolzhikova; Kirill Krasnoslobotsev; Ludmila Kolobukhina; Maria Nikiforova; Nadezhda Kuznetsova; Olesya Venchakova; Olga Burgasova; Svetlana Smetanina; Svetlana Trushakova; Valeria Bacalin; Vladimir Gushchin                                                                                                                                        |
| EPI_ISL_469057                                                                                                                                                                                                                                                                                                                                                                                   | Inger Landgren                                                                                         | The Public Health Agency of Sweden                                                                                      | Anna Risberg; Anna-Malin Linde; Karin Tegmark-Wisell; Maria Lind Karlberg; Mattias Haukland; Olov Svartstrom; Oskar Karlsson Lindsjö; Petra Edquist; Reza Advani; Sandra Brodsson; Shamam Muradrasoli                                                                                                                                                                                                                                                                                                                                                                                                             |
| EPI_ISL_635124 to 635125, EPI_ISL_635130 to 635131, EPI_ISL_635183, EPI_ISL_668412 to 668416, EPI_ISL_708030 to 708031, EPI_ISL_708036 to 708039, EPI_ISL_708151 to 708153, EPI_ISL_775440 to 775441, EPI_ISL_860226 to 860228, EPI_ISL_860291 to 860292                                                                                                                                         |                                                                                                        |                                                                                                                         | Atiya R Ali; Hilde Elshaug; Hilde Vollan; Kamilla Heddeland Instefjord; Karoline Bragstad; Kathrine Stene-Johansen; Marie Paulsen Madsen; Olav Hungnes; Rasmus Riis Kopperud                                                                                                                                                                                                                                                                                                                                                                                                                                      |
| see above                                                                                                                                                                                                                                                                                                                                                                                        | Innlandet Hospital Trust, Division Lillehammer, Department for Medical Microbiology                    | Norwegian Institute of Public Health, Department of Virology                                                            | Angela Brisebarre; Etienne Simon-Lorière; Flora Donati; Marion Barbet; Maud Vanpeene; Mélanie Albert; Meline Bizard; Mélnie Albert; Sylvie Behillil; Sylvie van der Werf; Vincent Enouf                                                                                                                                                                                                                                                                                                                                                                                                                           |
| EPI_ISL_416498, EPI_ISL_428355 to 428357                                                                                                                                                                                                                                                                                                                                                         | Institut Médico légal- Hop R. Poincaré                                                                 | National Reference Center for Viruses of Respiratory Infections, Institut Pasteur, Paris                                | Alexandre; Antonin; Bal; Bouscambert-Duchamp; Brengel-Pesce; Bruno.; Cheynet; Destras; Florence; Gaymard; Gregory; Josset; Karen; Laurence; Lina; Martine; Maude; Morfin-Sherpa; Valette; Valérie                                                                                                                                                                                                                                                                                                                                                                                                                 |
| EPI_ISL_416747 to 416748, EPI_ISL_416750, EPI_ISL_416753 to 416754, EPI_ISL_416756, EPI_ISL_416758                                                                                                                                                                                                                                                                                               | Institut des Agents Infectieux (IAI) Hospices Civils de Lyon                                           | CNR Virus des Infections Respiratoires - France SUD                                                                     | Alexandre; Antonin; Bal; Bruno Lina; Carine Moustaud; Florence Morfin-Sherpa; Gregory Destras; Gwendolyne Burfin; Laurence Josset; Martine Valette; Maude Bouscambert-Duchamp; Raphaëlle Lamy; Solenne Brun                                                                                                                                                                                                                                                                                                                                                                                                       |
| EPI_ISL_417333 to 417337, EPI_ISL_417339, EPI_ISL_418420 to 418425, EPI_ISL_418429 to 418432, EPI_ISL_419169 to 419173, EPI_ISL_419177 to 419182, EPI_ISL_419184, EPI_ISL_420604 to 420611, EPI_ISL_420615 to 420616, EPI_ISL_420618 to 420619, EPI_ISL_420621 to 420625, EPI_ISL_508871 to 508874, EPI_ISL_508877, EPI_ISL_508882 to 508911, EPI_ISL_509007 to 509011, EPI_ISL_509013 to 509014 |                                                                                                        |                                                                                                                         |                                                                                                                                                                                                                                                                                                                                                                                                                                                                                                                                                                                                                   |
| see above                                                                                                                                                                                                                                                                                                                                                                                        | Institut des Agents Infectieux (IAI), Hospices Civils de Lyon                                          | CNR Virus des Infections Respiratoires - France SUD                                                                     | Alexandre Gaymard; Antonin Bal; Bruno Lina; Carine Moustaud; Florence Morfin-Sherpa; Gregory Destras; Gwendolyne Burfin; Laurence Josset; Martine Valette; Maude Bouscambert-Duchamp; Raphaëlle Lamy; Solenne Brun                                                                                                                                                                                                                                                                                                                                                                                                |
| EPI_ISL_437913 to 437932, EPI_ISL_437974 to 437978, EPI_ISL_437980 to 437981, EPI_ISL_437984 to 437991, EPI_ISL_475763, EPI_ISL_475769, EPI_ISL_475813 to 475814, EPI_ISL_475816, EPI_ISL_475818 to 475820, EPI_ISL_475822 to 475823, EPI_ISL_475825 to 475829, EPI_ISL_475916 to 475927, EPI_ISL_583601 to 583613, EPI_ISL_583615 to 583616, EPI_ISL_583691                                     |                                                                                                        |                                                                                                                         |                                                                                                                                                                                                                                                                                                                                                                                                                                                                                                                                                                                                                   |
| see above                                                                                                                                                                                                                                                                                                                                                                                        | Institut für Virologie am Department für Hygiene, Mikrobiologie und Public Health                      | Bergthaler laboratory, CeMM Research Center for Molecular Medicine of the Austrian Academy of Sciences                  | Adi Steinrigl; Alexander Lercher; Alexandra Popa; Andreas Bergthaler; Benedikt Agerer; Christian Paar; Christoph Bock; Daniela Schmid; Dorothee von Laer; Elisabeth Puchhammer-Stoeckl; Franz Allerberger; Gernot Walder; Gregor Hörmann; Guenter Weiss; Gunther Vogl; Henrique Colaco; Jakob-Wendelin Genger; Jan Laine; Judith Aberle; Kinga Rigler-Hohenwarter; Lukas Endler; Manfred Nairz; Mark Smyth; Martin Senekowitsch; Michael Schuster; Peter Hufnagl; Peter Obrist; Rainer Gattringer; Sabine Sussitz-Rack; Stephan Aberle; Thomas Penz; Wegene Borena                                                |
| EPI_ISL_485809 to 485813, EPI_ISL_508687 to 508704                                                                                                                                                                                                                                                                                                                                               | Institut für Virologie und Epidemiologie der Viruskrankheiten, Universitätsklinikum Tübingen           | NGS Competence Center Tübingen, Institut für Medizinische Mikrobiologie und Hygiene, Universitätsklinikum Tübingen      | Angel Angelov; Angelov at al.; Angelov et al.                                                                                                                                                                                                                                                                                                                                                                                                                                                                                                                                                                     |
| EPI_ISL_574790 to 574794, EPI_ISL_574796 to 574858, EPI_ISL_574860 to 574862                                                                                                                                                                                                                                                                                                                     | Institute for Infectious Diseases, University of Bern                                                  | Institute for Infectious Diseases, University of Bern                                                                   | Alban Ramette; Christian Baumann; Cora Sägesser; Franziska Suter-Riniker; Michel C Koch; Miguel A Terrazos Miani; Peter Keller; Stephen L Leib                                                                                                                                                                                                                                                                                                                                                                                                                                                                    |
| EPI_ISL_831649 to 831650, EPI_ISL_831652, EPI_ISL_831654, EPI_ISL_831656 to 831659                                                                                                                                                                                                                                                                                                               | Institute for Infectious Diseases, University of Bern, Switzerland                                     | Institute for Infectious Diseases, University of Bern, Switzerland                                                      | Alban Ramette; Christian Baumann; Cora Sägesser; Franziska Suter-Riniker; Michel C Koch; Miguel A Terrazos Miani; Pascal Bittel; Peter Keller; Stephen L Leib                                                                                                                                                                                                                                                                                                                                                                                                                                                     |
| EPI_ISL_583853, EPI_ISL_583855, EPI_ISL_583857 to 583868, EPI_ISL_853856 to 853873, EPI_ISL_853915 to 853916                                                                                                                                                                                                                                                                                     | Institute for Laboratory Diagnostics and Microbiology, Klinikum Klagenfurt am Worthersee               | Bergthaler laboratory, CeMM Research Center for Molecular Medicine of the Austrian Academy of Sciences                  | Adi Steinrigl; Alexander Lercher; Alexandra Popa; Andreas Bergthaler; Anna Schedl; Benedikt Agerer; Christian Paar; Christoph Bock; Christoph Bock; Daniela Schmid; Dorothee von Laer; Elisabeth Puchhammer-Stoeckl; Franz Allerberger; Gernot Walder; Gregor Hörmann; Guenter Weiss; Gunther Vogl; Henrique Colaco; Jakob-Wendelin Genger; Jan Laine; Judith Aberle; Kinga Rigler-Hohenwarter; Lukas Endler; Manfred Nairz; Mark Smyth; Martin Senekowitsch; Michael Schuster; Michael Schuster; Peter Hufnagl; Peter Obrist; Rainer Gattringer; Sabine Sussitz-Rack; Stephan Aberle; Thomas Penz; Wegene Borena |
| EPI_ISL_677723, EPI_ISL_678251, EPI_ISL_678253                                                                                                                                                                                                                                                                                                                                                   | Institute for Lung Diseases in Children - Skopje                                                       | Research Center for Genetic Engineering and Biotechnology "Georgi D. Efremov" , Macedonian Academy of Sciences and Arts | RCGEB - MASA                                                                                                                                                                                                                                                                                                                                                                                                                                                                                                                                                                                                      |
| EPI_ISL_583580 to 583598                                                                                                                                                                                                                                                                                                                                                                         | Institute for Medical and Chemical Laboratory Diagnostics, Kepler Universitätsklinikum                 | Bergthaler laboratory, CeMM Research Center for Molecular Medicine of the Austrian Academy of Sciences                  | Adi Steinrigl; Alexander Lercher; Alexandra Popa; Andreas Bergthaler; Benedikt Agerer; Christian Paar; Christoph Bock; Daniela Schmid; Dorothee von Laer; Elisabeth Puchhammer-Stoeckl; Franz Allerberger; Gernot Walder; Gregor Hörmann; Guenter Weiss; Gunther Vogl; Henrique Colaco; Jakob-Wendelin Genger; Jan Laine; Judith Aberle; Kinga Rigler-Hohenwarter; Lukas Endler; Manfred Nairz; Mark Smyth; Martin Senekowitsch; Michael Schuster; Peter Hufnagl; Peter Obrist; Rainer Gattringer; Sabine Sussitz-Rack; Stephan Aberle; Thomas Penz; Wegene Borena                                                |
| EPI_ISL_429659, EPI_ISL_429663, EPI_ISL_429705, EPI_ISL_429792, EPI_ISL_429802 to 429803, EPI_ISL_429805, EPI_ISL_454605 to 454606, EPI_ISL_455566 to 455567, EPI_ISL_468591, EPI_ISL_468656                                                                                                                                                                                                     |                                                                                                        |                                                                                                                         |                                                                                                                                                                                                                                                                                                                                                                                                                                                                                                                                                                                                                   |
| see above                                                                                                                                                                                                                                                                                                                                                                                        | Institute for Public Health                                                                            | Laboratory for advanced genomics                                                                                        | Filip Roki; Igor Jurak; Lovro Trgovec-Greif; Neven Sui; Oliver Vugrek; Tomislav Rukavina                                                                                                                                                                                                                                                                                                                                                                                                                                                                                                                          |
| EPI_ISL_492075 to 492086                                                                                                                                                                                                                                                                                                                                                                         | Institute for Public Health of the Republic of North Macedonia                                         | Charite Universitätsmedizin Berlin, Institute of Virology                                                               | Barbara Muhlemann; Christian Drosten; Elizabeta Jancheska; Golubinka Bosevska; Joern Beheim-Schwarzbach; Julia Schneider; Maja Kuzmanovska; Talitha Veith; Terry Jones; Victor M Corman                                                                                                                                                                                                                                                                                                                                                                                                                           |
| EPI_ISL_728560 to 728561                                                                                                                                                                                                                                                                                                                                                                         | Institute for Urban Disease Control and Prevention                                                     | COVID-19 Network Investigations (CONI) Alliance                                                                         | Amornmas Kongklieng; Anek Mungaomklang; Angkana Huang; Anthony R. Jones; Arporn Wangiwiatsan; Bhakbhoom Panthan; Chonticha Klungtong; Ekawat Pasomsub; Elizabeth Batty; Insee Sornorn; Janjira Thaipadungpanit; Kamolthip Atsawawanun; Khajohn Joonsalak; Kingkan Rakmanee;                                                                                                                                                                                                                                                                                                                                       |

|                                                                                                                                                                                                                                                                                                                                                                                                                                                                                                                                                                                                                                                                                                                                                                                                                                                                                                                                                                                                                                                                                                                                                                                                                                                                                                                                                                                                                                                                                                                                                                                                                                                                                                                                                                                                                                                                                                                                                                                                                                                                                                                                                                                                                                                                                                                                                                                                                                                                                                                                                                                                                                                                                                                                                                                                                                                                                                                                                                                                                                                                                                                                                                                                                                                                                                                                                                                                                                                                                                                                                                                                                                                                                                                                                                                                                                                                                                                                                                                                                                                                                                                                                                                                                                                                                                                                                                                                                                                                                                                                                                                                                                                                                                                                                                                                                                                                                                                                                                                                                                                                                                                                                                                                                                                                                                                                                                                                                                                                                                                                                                                                                                                                                                                                                                                                                                                                                                                                                                                                                                                                                                                                                                                                                                                                                                                                                                                                                                                                                                                                                                                                                                                                                                                                                                                                                                                                                                                                                                                                                                                                                                                                                                                                                                                                                                                                                                                                                                                                                                                                                                                                                                                                                                                                                                                                                                                                                                                                                                                                                                                                                                                                                                                                                                                                                                                                                                                                                                                                                                                                                                                                                                                                                                                                                                                                                                                                                                                                                                                                                                                                                                                                                                                                                                                                                                                                                                                                                                                                                                                                                                                                                                                                                                                                                                                                                                                                                                                                                                                                                                                                                                                                                                                                                                                                                                                                                                                                                                                                                                                                                                                                                                                                                                                                                                                                                                                                                                                                                                                                                                                                                                                                                                                                                                                                                                                                                             |                                                                                                                                                             |                                                                                                                                               |                                                                                                                                                                                                                                                                                                                                                                                                                                                                                                                                                                                                                                                                                                                                                                                                               |
|-------------------------------------------------------------------------------------------------------------------------------------------------------------------------------------------------------------------------------------------------------------------------------------------------------------------------------------------------------------------------------------------------------------------------------------------------------------------------------------------------------------------------------------------------------------------------------------------------------------------------------------------------------------------------------------------------------------------------------------------------------------------------------------------------------------------------------------------------------------------------------------------------------------------------------------------------------------------------------------------------------------------------------------------------------------------------------------------------------------------------------------------------------------------------------------------------------------------------------------------------------------------------------------------------------------------------------------------------------------------------------------------------------------------------------------------------------------------------------------------------------------------------------------------------------------------------------------------------------------------------------------------------------------------------------------------------------------------------------------------------------------------------------------------------------------------------------------------------------------------------------------------------------------------------------------------------------------------------------------------------------------------------------------------------------------------------------------------------------------------------------------------------------------------------------------------------------------------------------------------------------------------------------------------------------------------------------------------------------------------------------------------------------------------------------------------------------------------------------------------------------------------------------------------------------------------------------------------------------------------------------------------------------------------------------------------------------------------------------------------------------------------------------------------------------------------------------------------------------------------------------------------------------------------------------------------------------------------------------------------------------------------------------------------------------------------------------------------------------------------------------------------------------------------------------------------------------------------------------------------------------------------------------------------------------------------------------------------------------------------------------------------------------------------------------------------------------------------------------------------------------------------------------------------------------------------------------------------------------------------------------------------------------------------------------------------------------------------------------------------------------------------------------------------------------------------------------------------------------------------------------------------------------------------------------------------------------------------------------------------------------------------------------------------------------------------------------------------------------------------------------------------------------------------------------------------------------------------------------------------------------------------------------------------------------------------------------------------------------------------------------------------------------------------------------------------------------------------------------------------------------------------------------------------------------------------------------------------------------------------------------------------------------------------------------------------------------------------------------------------------------------------------------------------------------------------------------------------------------------------------------------------------------------------------------------------------------------------------------------------------------------------------------------------------------------------------------------------------------------------------------------------------------------------------------------------------------------------------------------------------------------------------------------------------------------------------------------------------------------------------------------------------------------------------------------------------------------------------------------------------------------------------------------------------------------------------------------------------------------------------------------------------------------------------------------------------------------------------------------------------------------------------------------------------------------------------------------------------------------------------------------------------------------------------------------------------------------------------------------------------------------------------------------------------------------------------------------------------------------------------------------------------------------------------------------------------------------------------------------------------------------------------------------------------------------------------------------------------------------------------------------------------------------------------------------------------------------------------------------------------------------------------------------------------------------------------------------------------------------------------------------------------------------------------------------------------------------------------------------------------------------------------------------------------------------------------------------------------------------------------------------------------------------------------------------------------------------------------------------------------------------------------------------------------------------------------------------------------------------------------------------------------------------------------------------------------------------------------------------------------------------------------------------------------------------------------------------------------------------------------------------------------------------------------------------------------------------------------------------------------------------------------------------------------------------------------------------------------------------------------------------------------------------------------------------------------------------------------------------------------------------------------------------------------------------------------------------------------------------------------------------------------------------------------------------------------------------------------------------------------------------------------------------------------------------------------------------------------------------------------------------------------------------------------------------------------------------------------------------------------------------------------------------------------------------------------------------------------------------------------------------------------------------------------------------------------------------------------------------------------------------------------------------------------------------------------------------------------------------------------------------------------------------------------------------------------------------------------------------------------------------------------------------------------------------------------------------------------------------------------------------------------------------------------------------------------------------------------------------------------------------------------------------------------------------------------------------------------------------------------------------------------------------------------------------------------------------------------------------------------------------------------------------------------------------------------------------------------------------------------------------------------------------------------------------------------------------------------------------------------------------------------------------------------------------------------------------------------------------------------------------------------------------------------------------------------------------------------------------------------------------------------------------------------------------------------------------------------------------------------------------------------------------------------------------------------------------------------------------------------------------------------------------------------------------------------------------------------------------------------------------------------------------------------------------------------------------------------------------------------------------------------------------------------------------------------------------------------------------------------------------------------------------------------------------------------------------------------------------------------------------------------------------------------------------------------------------------------------------------------------------------------------------------------------------------------------------------------------------------------------------------------------------------------------------------------------------------------------------------------------------------------------------------------------------------------------------------------------------------------------------------------------------------------------------------------------------------------------------------------------------------------------------------------------------------------------------------------------------------------------------------------------------------------------------------------------------------------------------|-------------------------------------------------------------------------------------------------------------------------------------------------------------|-----------------------------------------------------------------------------------------------------------------------------------------------|---------------------------------------------------------------------------------------------------------------------------------------------------------------------------------------------------------------------------------------------------------------------------------------------------------------------------------------------------------------------------------------------------------------------------------------------------------------------------------------------------------------------------------------------------------------------------------------------------------------------------------------------------------------------------------------------------------------------------------------------------------------------------------------------------------------|
|                                                                                                                                                                                                                                                                                                                                                                                                                                                                                                                                                                                                                                                                                                                                                                                                                                                                                                                                                                                                                                                                                                                                                                                                                                                                                                                                                                                                                                                                                                                                                                                                                                                                                                                                                                                                                                                                                                                                                                                                                                                                                                                                                                                                                                                                                                                                                                                                                                                                                                                                                                                                                                                                                                                                                                                                                                                                                                                                                                                                                                                                                                                                                                                                                                                                                                                                                                                                                                                                                                                                                                                                                                                                                                                                                                                                                                                                                                                                                                                                                                                                                                                                                                                                                                                                                                                                                                                                                                                                                                                                                                                                                                                                                                                                                                                                                                                                                                                                                                                                                                                                                                                                                                                                                                                                                                                                                                                                                                                                                                                                                                                                                                                                                                                                                                                                                                                                                                                                                                                                                                                                                                                                                                                                                                                                                                                                                                                                                                                                                                                                                                                                                                                                                                                                                                                                                                                                                                                                                                                                                                                                                                                                                                                                                                                                                                                                                                                                                                                                                                                                                                                                                                                                                                                                                                                                                                                                                                                                                                                                                                                                                                                                                                                                                                                                                                                                                                                                                                                                                                                                                                                                                                                                                                                                                                                                                                                                                                                                                                                                                                                                                                                                                                                                                                                                                                                                                                                                                                                                                                                                                                                                                                                                                                                                                                                                                                                                                                                                                                                                                                                                                                                                                                                                                                                                                                                                                                                                                                                                                                                                                                                                                                                                                                                                                                                                                                                                                                                                                                                                                                                                                                                                                                                                                                                                                                                                                             |                                                                                                                                                             |                                                                                                                                               | Krittikorn Kumpornsin; Namfon Kotanan; Prayuth Kaewmalang; Pukkaporn Parnwijitkul; Stefan Fernandez; Thanat Chookajorn; Theerarat Kochakarn; Treewat Watthanachockchai; Wasun Chantraitta; Wuditchai Manasatienki                                                                                                                                                                                                                                                                                                                                                                                                                                                                                                                                                                                             |
| EPI_ISL_572330 to 572331                                                                                                                                                                                                                                                                                                                                                                                                                                                                                                                                                                                                                                                                                                                                                                                                                                                                                                                                                                                                                                                                                                                                                                                                                                                                                                                                                                                                                                                                                                                                                                                                                                                                                                                                                                                                                                                                                                                                                                                                                                                                                                                                                                                                                                                                                                                                                                                                                                                                                                                                                                                                                                                                                                                                                                                                                                                                                                                                                                                                                                                                                                                                                                                                                                                                                                                                                                                                                                                                                                                                                                                                                                                                                                                                                                                                                                                                                                                                                                                                                                                                                                                                                                                                                                                                                                                                                                                                                                                                                                                                                                                                                                                                                                                                                                                                                                                                                                                                                                                                                                                                                                                                                                                                                                                                                                                                                                                                                                                                                                                                                                                                                                                                                                                                                                                                                                                                                                                                                                                                                                                                                                                                                                                                                                                                                                                                                                                                                                                                                                                                                                                                                                                                                                                                                                                                                                                                                                                                                                                                                                                                                                                                                                                                                                                                                                                                                                                                                                                                                                                                                                                                                                                                                                                                                                                                                                                                                                                                                                                                                                                                                                                                                                                                                                                                                                                                                                                                                                                                                                                                                                                                                                                                                                                                                                                                                                                                                                                                                                                                                                                                                                                                                                                                                                                                                                                                                                                                                                                                                                                                                                                                                                                                                                                                                                                                                                                                                                                                                                                                                                                                                                                                                                                                                                                                                                                                                                                                                                                                                                                                                                                                                                                                                                                                                                                                                                                                                                                                                                                                                                                                                                                                                                                                                                                                                                                                    | Institute for Virology, University Hospital Duesseldorf, Medical Faculty, Heinrich-Heine-University Duesseldorf                                             | Institute for Virology, University Hospital Duesseldorf, Medical Faculty, Heinrich-Heine-University Duesseldorf                               | : Alexander Killer; Andreas Walker; Annermarie Mohring; Anselm Kunstein; Ansgar Schulz; Björn Jensen; Carlone Klindt; Edwin Bölke; Gerald Antoch; Heiner Schaal; Jennifer Neubert; Johannes Bode; Johannes C. Fischer; Jörg Timm; Lisa Müller; Maximilian Damagnez; Nadine Lübke; Ortwin Adams; Philipp Albrecht; Philipp Ostermann; Saskia Elben; Tina Senff; Tom Lüdde; Torsten Feldt; Verena Keitel                                                                                                                                                                                                                                                                                                                                                                                                        |
| EPI_ISL_602462 to 602474, EPI_ISL_602476 to 602498, EPI_ISL_602500 to 602509, EPI_ISL_602518 to 602521, EPI_ISL_602523 to 602532, EPI_ISL_626211 to 626230, EPI_ISL_717977                                                                                                                                                                                                                                                                                                                                                                                                                                                                                                                                                                                                                                                                                                                                                                                                                                                                                                                                                                                                                                                                                                                                                                                                                                                                                                                                                                                                                                                                                                                                                                                                                                                                                                                                                                                                                                                                                                                                                                                                                                                                                                                                                                                                                                                                                                                                                                                                                                                                                                                                                                                                                                                                                                                                                                                                                                                                                                                                                                                                                                                                                                                                                                                                                                                                                                                                                                                                                                                                                                                                                                                                                                                                                                                                                                                                                                                                                                                                                                                                                                                                                                                                                                                                                                                                                                                                                                                                                                                                                                                                                                                                                                                                                                                                                                                                                                                                                                                                                                                                                                                                                                                                                                                                                                                                                                                                                                                                                                                                                                                                                                                                                                                                                                                                                                                                                                                                                                                                                                                                                                                                                                                                                                                                                                                                                                                                                                                                                                                                                                                                                                                                                                                                                                                                                                                                                                                                                                                                                                                                                                                                                                                                                                                                                                                                                                                                                                                                                                                                                                                                                                                                                                                                                                                                                                                                                                                                                                                                                                                                                                                                                                                                                                                                                                                                                                                                                                                                                                                                                                                                                                                                                                                                                                                                                                                                                                                                                                                                                                                                                                                                                                                                                                                                                                                                                                                                                                                                                                                                                                                                                                                                                                                                                                                                                                                                                                                                                                                                                                                                                                                                                                                                                                                                                                                                                                                                                                                                                                                                                                                                                                                                                                                                                                                                                                                                                                                                                                                                                                                                                                                                                                                                                                                  |                                                                                                                                                             |                                                                                                                                               |                                                                                                                                                                                                                                                                                                                                                                                                                                                                                                                                                                                                                                                                                                                                                                                                               |
| see above                                                                                                                                                                                                                                                                                                                                                                                                                                                                                                                                                                                                                                                                                                                                                                                                                                                                                                                                                                                                                                                                                                                                                                                                                                                                                                                                                                                                                                                                                                                                                                                                                                                                                                                                                                                                                                                                                                                                                                                                                                                                                                                                                                                                                                                                                                                                                                                                                                                                                                                                                                                                                                                                                                                                                                                                                                                                                                                                                                                                                                                                                                                                                                                                                                                                                                                                                                                                                                                                                                                                                                                                                                                                                                                                                                                                                                                                                                                                                                                                                                                                                                                                                                                                                                                                                                                                                                                                                                                                                                                                                                                                                                                                                                                                                                                                                                                                                                                                                                                                                                                                                                                                                                                                                                                                                                                                                                                                                                                                                                                                                                                                                                                                                                                                                                                                                                                                                                                                                                                                                                                                                                                                                                                                                                                                                                                                                                                                                                                                                                                                                                                                                                                                                                                                                                                                                                                                                                                                                                                                                                                                                                                                                                                                                                                                                                                                                                                                                                                                                                                                                                                                                                                                                                                                                                                                                                                                                                                                                                                                                                                                                                                                                                                                                                                                                                                                                                                                                                                                                                                                                                                                                                                                                                                                                                                                                                                                                                                                                                                                                                                                                                                                                                                                                                                                                                                                                                                                                                                                                                                                                                                                                                                                                                                                                                                                                                                                                                                                                                                                                                                                                                                                                                                                                                                                                                                                                                                                                                                                                                                                                                                                                                                                                                                                                                                                                                                                                                                                                                                                                                                                                                                                                                                                                                                                                                                                                   | Institute for Virology, University Hospital Essen                                                                                                           | Center of Medical Microbiology, Virology, and Hospital Hygiene, University of Duesseldorf                                                     | Alexander Dilthey; Andreas Walker; Daniel Strelow; Jessica Nicolai; Jörg Timm; Klaus Pfeffer; Lisanna Hülse; Malte Kohns Vasconcelos; Maximilian Damagnez; Nadine Lübke; Olympia E. Anastasiou; Tobias Wienemann; Torsten Houwaart; Ulf Dittmer                                                                                                                                                                                                                                                                                                                                                                                                                                                                                                                                                               |
| EPI_ISL_525472 to 525473                                                                                                                                                                                                                                                                                                                                                                                                                                                                                                                                                                                                                                                                                                                                                                                                                                                                                                                                                                                                                                                                                                                                                                                                                                                                                                                                                                                                                                                                                                                                                                                                                                                                                                                                                                                                                                                                                                                                                                                                                                                                                                                                                                                                                                                                                                                                                                                                                                                                                                                                                                                                                                                                                                                                                                                                                                                                                                                                                                                                                                                                                                                                                                                                                                                                                                                                                                                                                                                                                                                                                                                                                                                                                                                                                                                                                                                                                                                                                                                                                                                                                                                                                                                                                                                                                                                                                                                                                                                                                                                                                                                                                                                                                                                                                                                                                                                                                                                                                                                                                                                                                                                                                                                                                                                                                                                                                                                                                                                                                                                                                                                                                                                                                                                                                                                                                                                                                                                                                                                                                                                                                                                                                                                                                                                                                                                                                                                                                                                                                                                                                                                                                                                                                                                                                                                                                                                                                                                                                                                                                                                                                                                                                                                                                                                                                                                                                                                                                                                                                                                                                                                                                                                                                                                                                                                                                                                                                                                                                                                                                                                                                                                                                                                                                                                                                                                                                                                                                                                                                                                                                                                                                                                                                                                                                                                                                                                                                                                                                                                                                                                                                                                                                                                                                                                                                                                                                                                                                                                                                                                                                                                                                                                                                                                                                                                                                                                                                                                                                                                                                                                                                                                                                                                                                                                                                                                                                                                                                                                                                                                                                                                                                                                                                                                                                                                                                                                                                                                                                                                                                                                                                                                                                                                                                                                                                                                                    | Institute of Clinical Microbiology and Hygiene, University Hospital Regensburg                                                                              | Institute of Clinical Microbiology and Hygiene, University Hospital Regensburg                                                                | Hiergeist, A.                                                                                                                                                                                                                                                                                                                                                                                                                                                                                                                                                                                                                                                                                                                                                                                                 |
| EPI_ISL_462480, EPI_ISL_485399, EPI_ISL_582031 to 582032                                                                                                                                                                                                                                                                                                                                                                                                                                                                                                                                                                                                                                                                                                                                                                                                                                                                                                                                                                                                                                                                                                                                                                                                                                                                                                                                                                                                                                                                                                                                                                                                                                                                                                                                                                                                                                                                                                                                                                                                                                                                                                                                                                                                                                                                                                                                                                                                                                                                                                                                                                                                                                                                                                                                                                                                                                                                                                                                                                                                                                                                                                                                                                                                                                                                                                                                                                                                                                                                                                                                                                                                                                                                                                                                                                                                                                                                                                                                                                                                                                                                                                                                                                                                                                                                                                                                                                                                                                                                                                                                                                                                                                                                                                                                                                                                                                                                                                                                                                                                                                                                                                                                                                                                                                                                                                                                                                                                                                                                                                                                                                                                                                                                                                                                                                                                                                                                                                                                                                                                                                                                                                                                                                                                                                                                                                                                                                                                                                                                                                                                                                                                                                                                                                                                                                                                                                                                                                                                                                                                                                                                                                                                                                                                                                                                                                                                                                                                                                                                                                                                                                                                                                                                                                                                                                                                                                                                                                                                                                                                                                                                                                                                                                                                                                                                                                                                                                                                                                                                                                                                                                                                                                                                                                                                                                                                                                                                                                                                                                                                                                                                                                                                                                                                                                                                                                                                                                                                                                                                                                                                                                                                                                                                                                                                                                                                                                                                                                                                                                                                                                                                                                                                                                                                                                                                                                                                                                                                                                                                                                                                                                                                                                                                                                                                                                                                                                                                                                                                                                                                                                                                                                                                                                                                                                                                                                    | Institute of Human Genetics, Polish Academy of Sciences                                                                                                     | Institute of Human Genetics, Polish Academy of Sciences                                                                                       | Adam Ustaszewski; Andrzej Pawski; Emilia Lis; Ewa Zitkiewicz; Marta Kaczmarek-Ry; Micha Witt; Szymon Hryhorowicz                                                                                                                                                                                                                                                                                                                                                                                                                                                                                                                                                                                                                                                                                              |
| EPI_ISL_485400                                                                                                                                                                                                                                                                                                                                                                                                                                                                                                                                                                                                                                                                                                                                                                                                                                                                                                                                                                                                                                                                                                                                                                                                                                                                                                                                                                                                                                                                                                                                                                                                                                                                                                                                                                                                                                                                                                                                                                                                                                                                                                                                                                                                                                                                                                                                                                                                                                                                                                                                                                                                                                                                                                                                                                                                                                                                                                                                                                                                                                                                                                                                                                                                                                                                                                                                                                                                                                                                                                                                                                                                                                                                                                                                                                                                                                                                                                                                                                                                                                                                                                                                                                                                                                                                                                                                                                                                                                                                                                                                                                                                                                                                                                                                                                                                                                                                                                                                                                                                                                                                                                                                                                                                                                                                                                                                                                                                                                                                                                                                                                                                                                                                                                                                                                                                                                                                                                                                                                                                                                                                                                                                                                                                                                                                                                                                                                                                                                                                                                                                                                                                                                                                                                                                                                                                                                                                                                                                                                                                                                                                                                                                                                                                                                                                                                                                                                                                                                                                                                                                                                                                                                                                                                                                                                                                                                                                                                                                                                                                                                                                                                                                                                                                                                                                                                                                                                                                                                                                                                                                                                                                                                                                                                                                                                                                                                                                                                                                                                                                                                                                                                                                                                                                                                                                                                                                                                                                                                                                                                                                                                                                                                                                                                                                                                                                                                                                                                                                                                                                                                                                                                                                                                                                                                                                                                                                                                                                                                                                                                                                                                                                                                                                                                                                                                                                                                                                                                                                                                                                                                                                                                                                                                                                                                                                                                                                              | Institute of Human Genetics, Polish Academy of Sciences                                                                                                     | Institute of Human Genetics, Polish Academy of Sciences,                                                                                      | Adam Ustaszewski; Andrzej Pawski; Emilia Lis; Ewa Zitkiewicz; Marta Kaczmarek-Ry; Micha Witt; Szymon Hryhorowicz                                                                                                                                                                                                                                                                                                                                                                                                                                                                                                                                                                                                                                                                                              |
| EPI_ISL_450294                                                                                                                                                                                                                                                                                                                                                                                                                                                                                                                                                                                                                                                                                                                                                                                                                                                                                                                                                                                                                                                                                                                                                                                                                                                                                                                                                                                                                                                                                                                                                                                                                                                                                                                                                                                                                                                                                                                                                                                                                                                                                                                                                                                                                                                                                                                                                                                                                                                                                                                                                                                                                                                                                                                                                                                                                                                                                                                                                                                                                                                                                                                                                                                                                                                                                                                                                                                                                                                                                                                                                                                                                                                                                                                                                                                                                                                                                                                                                                                                                                                                                                                                                                                                                                                                                                                                                                                                                                                                                                                                                                                                                                                                                                                                                                                                                                                                                                                                                                                                                                                                                                                                                                                                                                                                                                                                                                                                                                                                                                                                                                                                                                                                                                                                                                                                                                                                                                                                                                                                                                                                                                                                                                                                                                                                                                                                                                                                                                                                                                                                                                                                                                                                                                                                                                                                                                                                                                                                                                                                                                                                                                                                                                                                                                                                                                                                                                                                                                                                                                                                                                                                                                                                                                                                                                                                                                                                                                                                                                                                                                                                                                                                                                                                                                                                                                                                                                                                                                                                                                                                                                                                                                                                                                                                                                                                                                                                                                                                                                                                                                                                                                                                                                                                                                                                                                                                                                                                                                                                                                                                                                                                                                                                                                                                                                                                                                                                                                                                                                                                                                                                                                                                                                                                                                                                                                                                                                                                                                                                                                                                                                                                                                                                                                                                                                                                                                                                                                                                                                                                                                                                                                                                                                                                                                                                                                                                              | Institute of Human Genetics, Polish Academy of Sciences Sanitary and Epidemiological Station in Pozna                                                       | Institute of Human Genetics, Polish Academy of Sciences                                                                                       | Adam Ustaszewski; Andrzej Pawski; Emilia Lis; Marta Kaczmarek-Ry; Micha Witt; Szymon Hryhorowicz                                                                                                                                                                                                                                                                                                                                                                                                                                                                                                                                                                                                                                                                                                              |
| EPI_ISL_450295                                                                                                                                                                                                                                                                                                                                                                                                                                                                                                                                                                                                                                                                                                                                                                                                                                                                                                                                                                                                                                                                                                                                                                                                                                                                                                                                                                                                                                                                                                                                                                                                                                                                                                                                                                                                                                                                                                                                                                                                                                                                                                                                                                                                                                                                                                                                                                                                                                                                                                                                                                                                                                                                                                                                                                                                                                                                                                                                                                                                                                                                                                                                                                                                                                                                                                                                                                                                                                                                                                                                                                                                                                                                                                                                                                                                                                                                                                                                                                                                                                                                                                                                                                                                                                                                                                                                                                                                                                                                                                                                                                                                                                                                                                                                                                                                                                                                                                                                                                                                                                                                                                                                                                                                                                                                                                                                                                                                                                                                                                                                                                                                                                                                                                                                                                                                                                                                                                                                                                                                                                                                                                                                                                                                                                                                                                                                                                                                                                                                                                                                                                                                                                                                                                                                                                                                                                                                                                                                                                                                                                                                                                                                                                                                                                                                                                                                                                                                                                                                                                                                                                                                                                                                                                                                                                                                                                                                                                                                                                                                                                                                                                                                                                                                                                                                                                                                                                                                                                                                                                                                                                                                                                                                                                                                                                                                                                                                                                                                                                                                                                                                                                                                                                                                                                                                                                                                                                                                                                                                                                                                                                                                                                                                                                                                                                                                                                                                                                                                                                                                                                                                                                                                                                                                                                                                                                                                                                                                                                                                                                                                                                                                                                                                                                                                                                                                                                                                                                                                                                                                                                                                                                                                                                                                                                                                                                                                              | Institute of Human Genetics, Polish Academy of Sciences; Sanitary and Epidemiological Station in Pozna                                                      | Institute of Human Genetics, Polish Academy of Sciences                                                                                       | Adam Ustaszewski; Andrzej Pawski; Emilia Lis; Marta Kaczmarek-Ry; Micha Witt; Szymon Hryhorowicz                                                                                                                                                                                                                                                                                                                                                                                                                                                                                                                                                                                                                                                                                                              |
| EPI_ISL_450338                                                                                                                                                                                                                                                                                                                                                                                                                                                                                                                                                                                                                                                                                                                                                                                                                                                                                                                                                                                                                                                                                                                                                                                                                                                                                                                                                                                                                                                                                                                                                                                                                                                                                                                                                                                                                                                                                                                                                                                                                                                                                                                                                                                                                                                                                                                                                                                                                                                                                                                                                                                                                                                                                                                                                                                                                                                                                                                                                                                                                                                                                                                                                                                                                                                                                                                                                                                                                                                                                                                                                                                                                                                                                                                                                                                                                                                                                                                                                                                                                                                                                                                                                                                                                                                                                                                                                                                                                                                                                                                                                                                                                                                                                                                                                                                                                                                                                                                                                                                                                                                                                                                                                                                                                                                                                                                                                                                                                                                                                                                                                                                                                                                                                                                                                                                                                                                                                                                                                                                                                                                                                                                                                                                                                                                                                                                                                                                                                                                                                                                                                                                                                                                                                                                                                                                                                                                                                                                                                                                                                                                                                                                                                                                                                                                                                                                                                                                                                                                                                                                                                                                                                                                                                                                                                                                                                                                                                                                                                                                                                                                                                                                                                                                                                                                                                                                                                                                                                                                                                                                                                                                                                                                                                                                                                                                                                                                                                                                                                                                                                                                                                                                                                                                                                                                                                                                                                                                                                                                                                                                                                                                                                                                                                                                                                                                                                                                                                                                                                                                                                                                                                                                                                                                                                                                                                                                                                                                                                                                                                                                                                                                                                                                                                                                                                                                                                                                                                                                                                                                                                                                                                                                                                                                                                                                                                                                                              | Institute of Human Genetics, Polish Academy of Sciences; Sanitary and Epidemiological Station in Pozna                                                      | Institute of Human Genetics, Polish Academy of Sciences                                                                                       | Adam Ustaszewski; Andrzej Pawski; Emilia Lis; Marta Kaczmarek-Ry; Micha Witt; Szymon Hryhorowicz                                                                                                                                                                                                                                                                                                                                                                                                                                                                                                                                                                                                                                                                                                              |
| EPI_ISL_723077 to 723117                                                                                                                                                                                                                                                                                                                                                                                                                                                                                                                                                                                                                                                                                                                                                                                                                                                                                                                                                                                                                                                                                                                                                                                                                                                                                                                                                                                                                                                                                                                                                                                                                                                                                                                                                                                                                                                                                                                                                                                                                                                                                                                                                                                                                                                                                                                                                                                                                                                                                                                                                                                                                                                                                                                                                                                                                                                                                                                                                                                                                                                                                                                                                                                                                                                                                                                                                                                                                                                                                                                                                                                                                                                                                                                                                                                                                                                                                                                                                                                                                                                                                                                                                                                                                                                                                                                                                                                                                                                                                                                                                                                                                                                                                                                                                                                                                                                                                                                                                                                                                                                                                                                                                                                                                                                                                                                                                                                                                                                                                                                                                                                                                                                                                                                                                                                                                                                                                                                                                                                                                                                                                                                                                                                                                                                                                                                                                                                                                                                                                                                                                                                                                                                                                                                                                                                                                                                                                                                                                                                                                                                                                                                                                                                                                                                                                                                                                                                                                                                                                                                                                                                                                                                                                                                                                                                                                                                                                                                                                                                                                                                                                                                                                                                                                                                                                                                                                                                                                                                                                                                                                                                                                                                                                                                                                                                                                                                                                                                                                                                                                                                                                                                                                                                                                                                                                                                                                                                                                                                                                                                                                                                                                                                                                                                                                                                                                                                                                                                                                                                                                                                                                                                                                                                                                                                                                                                                                                                                                                                                                                                                                                                                                                                                                                                                                                                                                                                                                                                                                                                                                                                                                                                                                                                                                                                                                                                                    | Institute of Medical Genetics and Applied Genomics                                                                                                          | Institute of Medical Genetics and Applied Genomics                                                                                            | Angel Angelov; Caspar Gross; Daniela Bezdán; Michael Bitzer; Michael Sonnabend; Michaela Pogoda; Nicolas Casadei; Siri Göpel; Stephan Ossowski; Thomas Iftner; Tina Ganzenmüller                                                                                                                                                                                                                                                                                                                                                                                                                                                                                                                                                                                                                              |
| EPI_ISL_803871, EPI_ISL_803874 to 803875, EPI_ISL_864563, EPI_ISL_864566, EPI_ISL_864568 to 864572, EPI_ISL_864574, EPI_ISL_864576, EPI_ISL_864578                                                                                                                                                                                                                                                                                                                                                                                                                                                                                                                                                                                                                                                                                                                                                                                                                                                                                                                                                                                                                                                                                                                                                                                                                                                                                                                                                                                                                                                                                                                                                                                                                                                                                                                                                                                                                                                                                                                                                                                                                                                                                                                                                                                                                                                                                                                                                                                                                                                                                                                                                                                                                                                                                                                                                                                                                                                                                                                                                                                                                                                                                                                                                                                                                                                                                                                                                                                                                                                                                                                                                                                                                                                                                                                                                                                                                                                                                                                                                                                                                                                                                                                                                                                                                                                                                                                                                                                                                                                                                                                                                                                                                                                                                                                                                                                                                                                                                                                                                                                                                                                                                                                                                                                                                                                                                                                                                                                                                                                                                                                                                                                                                                                                                                                                                                                                                                                                                                                                                                                                                                                                                                                                                                                                                                                                                                                                                                                                                                                                                                                                                                                                                                                                                                                                                                                                                                                                                                                                                                                                                                                                                                                                                                                                                                                                                                                                                                                                                                                                                                                                                                                                                                                                                                                                                                                                                                                                                                                                                                                                                                                                                                                                                                                                                                                                                                                                                                                                                                                                                                                                                                                                                                                                                                                                                                                                                                                                                                                                                                                                                                                                                                                                                                                                                                                                                                                                                                                                                                                                                                                                                                                                                                                                                                                                                                                                                                                                                                                                                                                                                                                                                                                                                                                                                                                                                                                                                                                                                                                                                                                                                                                                                                                                                                                                                                                                                                                                                                                                                                                                                                                                                                                                                                                                          |                                                                                                                                                             |                                                                                                                                               |                                                                                                                                                                                                                                                                                                                                                                                                                                                                                                                                                                                                                                                                                                                                                                                                               |
| see above                                                                                                                                                                                                                                                                                                                                                                                                                                                                                                                                                                                                                                                                                                                                                                                                                                                                                                                                                                                                                                                                                                                                                                                                                                                                                                                                                                                                                                                                                                                                                                                                                                                                                                                                                                                                                                                                                                                                                                                                                                                                                                                                                                                                                                                                                                                                                                                                                                                                                                                                                                                                                                                                                                                                                                                                                                                                                                                                                                                                                                                                                                                                                                                                                                                                                                                                                                                                                                                                                                                                                                                                                                                                                                                                                                                                                                                                                                                                                                                                                                                                                                                                                                                                                                                                                                                                                                                                                                                                                                                                                                                                                                                                                                                                                                                                                                                                                                                                                                                                                                                                                                                                                                                                                                                                                                                                                                                                                                                                                                                                                                                                                                                                                                                                                                                                                                                                                                                                                                                                                                                                                                                                                                                                                                                                                                                                                                                                                                                                                                                                                                                                                                                                                                                                                                                                                                                                                                                                                                                                                                                                                                                                                                                                                                                                                                                                                                                                                                                                                                                                                                                                                                                                                                                                                                                                                                                                                                                                                                                                                                                                                                                                                                                                                                                                                                                                                                                                                                                                                                                                                                                                                                                                                                                                                                                                                                                                                                                                                                                                                                                                                                                                                                                                                                                                                                                                                                                                                                                                                                                                                                                                                                                                                                                                                                                                                                                                                                                                                                                                                                                                                                                                                                                                                                                                                                                                                                                                                                                                                                                                                                                                                                                                                                                                                                                                                                                                                                                                                                                                                                                                                                                                                                                                                                                                                                                                                   | Institute of Medical Microbiology and Hospital Hygiene                                                                                                      | Institute of Medical Microbiology and Hospital Hygiene                                                                                        | Aljoscha Tersteegen; Prof. Dr. Achim Kaasch                                                                                                                                                                                                                                                                                                                                                                                                                                                                                                                                                                                                                                                                                                                                                                   |
| EPI_ISL_590823 to 590836                                                                                                                                                                                                                                                                                                                                                                                                                                                                                                                                                                                                                                                                                                                                                                                                                                                                                                                                                                                                                                                                                                                                                                                                                                                                                                                                                                                                                                                                                                                                                                                                                                                                                                                                                                                                                                                                                                                                                                                                                                                                                                                                                                                                                                                                                                                                                                                                                                                                                                                                                                                                                                                                                                                                                                                                                                                                                                                                                                                                                                                                                                                                                                                                                                                                                                                                                                                                                                                                                                                                                                                                                                                                                                                                                                                                                                                                                                                                                                                                                                                                                                                                                                                                                                                                                                                                                                                                                                                                                                                                                                                                                                                                                                                                                                                                                                                                                                                                                                                                                                                                                                                                                                                                                                                                                                                                                                                                                                                                                                                                                                                                                                                                                                                                                                                                                                                                                                                                                                                                                                                                                                                                                                                                                                                                                                                                                                                                                                                                                                                                                                                                                                                                                                                                                                                                                                                                                                                                                                                                                                                                                                                                                                                                                                                                                                                                                                                                                                                                                                                                                                                                                                                                                                                                                                                                                                                                                                                                                                                                                                                                                                                                                                                                                                                                                                                                                                                                                                                                                                                                                                                                                                                                                                                                                                                                                                                                                                                                                                                                                                                                                                                                                                                                                                                                                                                                                                                                                                                                                                                                                                                                                                                                                                                                                                                                                                                                                                                                                                                                                                                                                                                                                                                                                                                                                                                                                                                                                                                                                                                                                                                                                                                                                                                                                                                                                                                                                                                                                                                                                                                                                                                                                                                                                                                                                                                                    | Institute of Medical Virology, University of Zurich                                                                                                         | Institute of Medical Virology, University of Zurich                                                                                           | Alexandra Trkola; Benjamin G. Hale; Idola Busnadiego; Irene Abela; Marie O. Pohl; Maryam Zaheri; Michael Huber; Silke Stertz; Stefan Schmutz; Verena Kufner                                                                                                                                                                                                                                                                                                                                                                                                                                                                                                                                                                                                                                                   |
| EPI_ISL_420294 to 420295, EPI_ISL_420541, EPI_ISL_635200 to 635203, EPI_ISL_635205 to 635219, EPI_ISL_635221 to 635270, EPI_ISL_635272 to 635279, EPI_ISL_635281 to 635294, EPI_ISL_635296 to 635297, EPI_ISL_635299, EPI_ISL_636459 to 636461                                                                                                                                                                                                                                                                                                                                                                                                                                                                                                                                                                                                                                                                                                                                                                                                                                                                                                                                                                                                                                                                                                                                                                                                                                                                                                                                                                                                                                                                                                                                                                                                                                                                                                                                                                                                                                                                                                                                                                                                                                                                                                                                                                                                                                                                                                                                                                                                                                                                                                                                                                                                                                                                                                                                                                                                                                                                                                                                                                                                                                                                                                                                                                                                                                                                                                                                                                                                                                                                                                                                                                                                                                                                                                                                                                                                                                                                                                                                                                                                                                                                                                                                                                                                                                                                                                                                                                                                                                                                                                                                                                                                                                                                                                                                                                                                                                                                                                                                                                                                                                                                                                                                                                                                                                                                                                                                                                                                                                                                                                                                                                                                                                                                                                                                                                                                                                                                                                                                                                                                                                                                                                                                                                                                                                                                                                                                                                                                                                                                                                                                                                                                                                                                                                                                                                                                                                                                                                                                                                                                                                                                                                                                                                                                                                                                                                                                                                                                                                                                                                                                                                                                                                                                                                                                                                                                                                                                                                                                                                                                                                                                                                                                                                                                                                                                                                                                                                                                                                                                                                                                                                                                                                                                                                                                                                                                                                                                                                                                                                                                                                                                                                                                                                                                                                                                                                                                                                                                                                                                                                                                                                                                                                                                                                                                                                                                                                                                                                                                                                                                                                                                                                                                                                                                                                                                                                                                                                                                                                                                                                                                                                                                                                                                                                                                                                                                                                                                                                                                                                                                                                                                                                              |                                                                                                                                                             |                                                                                                                                               |                                                                                                                                                                                                                                                                                                                                                                                                                                                                                                                                                                                                                                                                                                                                                                                                               |
| see above                                                                                                                                                                                                                                                                                                                                                                                                                                                                                                                                                                                                                                                                                                                                                                                                                                                                                                                                                                                                                                                                                                                                                                                                                                                                                                                                                                                                                                                                                                                                                                                                                                                                                                                                                                                                                                                                                                                                                                                                                                                                                                                                                                                                                                                                                                                                                                                                                                                                                                                                                                                                                                                                                                                                                                                                                                                                                                                                                                                                                                                                                                                                                                                                                                                                                                                                                                                                                                                                                                                                                                                                                                                                                                                                                                                                                                                                                                                                                                                                                                                                                                                                                                                                                                                                                                                                                                                                                                                                                                                                                                                                                                                                                                                                                                                                                                                                                                                                                                                                                                                                                                                                                                                                                                                                                                                                                                                                                                                                                                                                                                                                                                                                                                                                                                                                                                                                                                                                                                                                                                                                                                                                                                                                                                                                                                                                                                                                                                                                                                                                                                                                                                                                                                                                                                                                                                                                                                                                                                                                                                                                                                                                                                                                                                                                                                                                                                                                                                                                                                                                                                                                                                                                                                                                                                                                                                                                                                                                                                                                                                                                                                                                                                                                                                                                                                                                                                                                                                                                                                                                                                                                                                                                                                                                                                                                                                                                                                                                                                                                                                                                                                                                                                                                                                                                                                                                                                                                                                                                                                                                                                                                                                                                                                                                                                                                                                                                                                                                                                                                                                                                                                                                                                                                                                                                                                                                                                                                                                                                                                                                                                                                                                                                                                                                                                                                                                                                                                                                                                                                                                                                                                                                                                                                                                                                                                                                                   | Institute of Microbiology and Immunology, Faculty of Medicine, University of Ljubljana                                                                      | Institute of Microbiology and Immunology, Faculty of Medicine, University of Ljubljana                                                        | Lucijan Skubic; Mario Poljak; Miša Korva; Samo Zakotnik; Tatjana Avši - Županc; Tatjana Avši - Županc; Tomaž Mark Zorec                                                                                                                                                                                                                                                                                                                                                                                                                                                                                                                                                                                                                                                                                       |
| EPI_ISL_635204                                                                                                                                                                                                                                                                                                                                                                                                                                                                                                                                                                                                                                                                                                                                                                                                                                                                                                                                                                                                                                                                                                                                                                                                                                                                                                                                                                                                                                                                                                                                                                                                                                                                                                                                                                                                                                                                                                                                                                                                                                                                                                                                                                                                                                                                                                                                                                                                                                                                                                                                                                                                                                                                                                                                                                                                                                                                                                                                                                                                                                                                                                                                                                                                                                                                                                                                                                                                                                                                                                                                                                                                                                                                                                                                                                                                                                                                                                                                                                                                                                                                                                                                                                                                                                                                                                                                                                                                                                                                                                                                                                                                                                                                                                                                                                                                                                                                                                                                                                                                                                                                                                                                                                                                                                                                                                                                                                                                                                                                                                                                                                                                                                                                                                                                                                                                                                                                                                                                                                                                                                                                                                                                                                                                                                                                                                                                                                                                                                                                                                                                                                                                                                                                                                                                                                                                                                                                                                                                                                                                                                                                                                                                                                                                                                                                                                                                                                                                                                                                                                                                                                                                                                                                                                                                                                                                                                                                                                                                                                                                                                                                                                                                                                                                                                                                                                                                                                                                                                                                                                                                                                                                                                                                                                                                                                                                                                                                                                                                                                                                                                                                                                                                                                                                                                                                                                                                                                                                                                                                                                                                                                                                                                                                                                                                                                                                                                                                                                                                                                                                                                                                                                                                                                                                                                                                                                                                                                                                                                                                                                                                                                                                                                                                                                                                                                                                                                                                                                                                                                                                                                                                                                                                                                                                                                                                                                                                              | Institute of Microbiology and Immunology, Faculty of Medicine, University of Ljubljana                                                                      | The National Laboratory of Health, Environment and Food - Centre for Medical Microbiology Maribor                                             | Mario Poljak; Miša Korva; Mojca Cimerman; Samo Zakotnik; Tatjana Avši - Županc; Tomaž Mark Zorec                                                                                                                                                                                                                                                                                                                                                                                                                                                                                                                                                                                                                                                                                                              |
| EPI_ISL_463008                                                                                                                                                                                                                                                                                                                                                                                                                                                                                                                                                                                                                                                                                                                                                                                                                                                                                                                                                                                                                                                                                                                                                                                                                                                                                                                                                                                                                                                                                                                                                                                                                                                                                                                                                                                                                                                                                                                                                                                                                                                                                                                                                                                                                                                                                                                                                                                                                                                                                                                                                                                                                                                                                                                                                                                                                                                                                                                                                                                                                                                                                                                                                                                                                                                                                                                                                                                                                                                                                                                                                                                                                                                                                                                                                                                                                                                                                                                                                                                                                                                                                                                                                                                                                                                                                                                                                                                                                                                                                                                                                                                                                                                                                                                                                                                                                                                                                                                                                                                                                                                                                                                                                                                                                                                                                                                                                                                                                                                                                                                                                                                                                                                                                                                                                                                                                                                                                                                                                                                                                                                                                                                                                                                                                                                                                                                                                                                                                                                                                                                                                                                                                                                                                                                                                                                                                                                                                                                                                                                                                                                                                                                                                                                                                                                                                                                                                                                                                                                                                                                                                                                                                                                                                                                                                                                                                                                                                                                                                                                                                                                                                                                                                                                                                                                                                                                                                                                                                                                                                                                                                                                                                                                                                                                                                                                                                                                                                                                                                                                                                                                                                                                                                                                                                                                                                                                                                                                                                                                                                                                                                                                                                                                                                                                                                                                                                                                                                                                                                                                                                                                                                                                                                                                                                                                                                                                                                                                                                                                                                                                                                                                                                                                                                                                                                                                                                                                                                                                                                                                                                                                                                                                                                                                                                                                                                                                                              | Institute of Molecular Virology, University Münster                                                                                                         | Institute of Molecular Virology, University Münster                                                                                           | Alexander Mellmann; Angeles Mecate Zambrano; Joachim Kühn; Linda Brunotte; Stephan Ludwig                                                                                                                                                                                                                                                                                                                                                                                                                                                                                                                                                                                                                                                                                                                     |
| EPI_ISL_577734 to 577735, EPI_ISL_577737 to 577742, EPI_ISL_583481 to 583488, EPI_ISL_717975, EPI_ISL_718250 to 718260, EPI_ISL_779403, EPI_ISL_779651 to 779660, EPI_ISL_788979 to 788988, EPI_ISL_791990                                                                                                                                                                                                                                                                                                                                                                                                                                                                                                                                                                                                                                                                                                                                                                                                                                                                                                                                                                                                                                                                                                                                                                                                                                                                                                                                                                                                                                                                                                                                                                                                                                                                                                                                                                                                                                                                                                                                                                                                                                                                                                                                                                                                                                                                                                                                                                                                                                                                                                                                                                                                                                                                                                                                                                                                                                                                                                                                                                                                                                                                                                                                                                                                                                                                                                                                                                                                                                                                                                                                                                                                                                                                                                                                                                                                                                                                                                                                                                                                                                                                                                                                                                                                                                                                                                                                                                                                                                                                                                                                                                                                                                                                                                                                                                                                                                                                                                                                                                                                                                                                                                                                                                                                                                                                                                                                                                                                                                                                                                                                                                                                                                                                                                                                                                                                                                                                                                                                                                                                                                                                                                                                                                                                                                                                                                                                                                                                                                                                                                                                                                                                                                                                                                                                                                                                                                                                                                                                                                                                                                                                                                                                                                                                                                                                                                                                                                                                                                                                                                                                                                                                                                                                                                                                                                                                                                                                                                                                                                                                                                                                                                                                                                                                                                                                                                                                                                                                                                                                                                                                                                                                                                                                                                                                                                                                                                                                                                                                                                                                                                                                                                                                                                                                                                                                                                                                                                                                                                                                                                                                                                                                                                                                                                                                                                                                                                                                                                                                                                                                                                                                                                                                                                                                                                                                                                                                                                                                                                                                                                                                                                                                                                                                                                                                                                                                                                                                                                                                                                                                                                                                                                                                                  |                                                                                                                                                             |                                                                                                                                               |                                                                                                                                                                                                                                                                                                                                                                                                                                                                                                                                                                                                                                                                                                                                                                                                               |
| see above                                                                                                                                                                                                                                                                                                                                                                                                                                                                                                                                                                                                                                                                                                                                                                                                                                                                                                                                                                                                                                                                                                                                                                                                                                                                                                                                                                                                                                                                                                                                                                                                                                                                                                                                                                                                                                                                                                                                                                                                                                                                                                                                                                                                                                                                                                                                                                                                                                                                                                                                                                                                                                                                                                                                                                                                                                                                                                                                                                                                                                                                                                                                                                                                                                                                                                                                                                                                                                                                                                                                                                                                                                                                                                                                                                                                                                                                                                                                                                                                                                                                                                                                                                                                                                                                                                                                                                                                                                                                                                                                                                                                                                                                                                                                                                                                                                                                                                                                                                                                                                                                                                                                                                                                                                                                                                                                                                                                                                                                                                                                                                                                                                                                                                                                                                                                                                                                                                                                                                                                                                                                                                                                                                                                                                                                                                                                                                                                                                                                                                                                                                                                                                                                                                                                                                                                                                                                                                                                                                                                                                                                                                                                                                                                                                                                                                                                                                                                                                                                                                                                                                                                                                                                                                                                                                                                                                                                                                                                                                                                                                                                                                                                                                                                                                                                                                                                                                                                                                                                                                                                                                                                                                                                                                                                                                                                                                                                                                                                                                                                                                                                                                                                                                                                                                                                                                                                                                                                                                                                                                                                                                                                                                                                                                                                                                                                                                                                                                                                                                                                                                                                                                                                                                                                                                                                                                                                                                                                                                                                                                                                                                                                                                                                                                                                                                                                                                                                                                                                                                                                                                                                                                                                                                                                                                                                                                                                                   | Institute of Virology, Biomedical Research Center of the Slovak Academy of Sciences, Bratislava                                                             | Faculty of Natural Sciences, Comenius University, Bratislava                                                                                  | Alena Košalová; Andrej Belák; Boris Klempa; Broa Brejová; Dominika Friová; Edita Staroová; Elena Tichá; Jozef Nosek; Juraj Kopáek; Kristína Boršová; Martina Liková; Martina Neboháová; Monika Sláviková; Peter Sabaka; Sabina Fumaová Havlíková; Tomáš Vina; Viktória Hodorová; Viktória abanová; ubomíra Lukáiková                                                                                                                                                                                                                                                                                                                                                                                                                                                                                          |
| EPI_ISL_417877 to 417880                                                                                                                                                                                                                                                                                                                                                                                                                                                                                                                                                                                                                                                                                                                                                                                                                                                                                                                                                                                                                                                                                                                                                                                                                                                                                                                                                                                                                                                                                                                                                                                                                                                                                                                                                                                                                                                                                                                                                                                                                                                                                                                                                                                                                                                                                                                                                                                                                                                                                                                                                                                                                                                                                                                                                                                                                                                                                                                                                                                                                                                                                                                                                                                                                                                                                                                                                                                                                                                                                                                                                                                                                                                                                                                                                                                                                                                                                                                                                                                                                                                                                                                                                                                                                                                                                                                                                                                                                                                                                                                                                                                                                                                                                                                                                                                                                                                                                                                                                                                                                                                                                                                                                                                                                                                                                                                                                                                                                                                                                                                                                                                                                                                                                                                                                                                                                                                                                                                                                                                                                                                                                                                                                                                                                                                                                                                                                                                                                                                                                                                                                                                                                                                                                                                                                                                                                                                                                                                                                                                                                                                                                                                                                                                                                                                                                                                                                                                                                                                                                                                                                                                                                                                                                                                                                                                                                                                                                                                                                                                                                                                                                                                                                                                                                                                                                                                                                                                                                                                                                                                                                                                                                                                                                                                                                                                                                                                                                                                                                                                                                                                                                                                                                                                                                                                                                                                                                                                                                                                                                                                                                                                                                                                                                                                                                                                                                                                                                                                                                                                                                                                                                                                                                                                                                                                                                                                                                                                                                                                                                                                                                                                                                                                                                                                                                                                                                                                                                                                                                                                                                                                                                                                                                                                                                                                                                                                                    | Institute of Virology, Biomedical Research Center of the Slovak Academy of Sciences, Bratislava; Public Health Authority of the Slovak Republic, Bratislava | Institute of Virology, Biomedical Research Center of the Slovak Academy of Sciences, Bratislava; Comenius University Science Park, Bratislava | Boris Klempa; Diana Rusáková; Edita Staroová; Elena Tichá; Jaroslav Budiš; Juraj Kopáek; Juraj Koi; Martina Liková; Miroslav Böhmer; Monika Sláviková; Sabina Fumaová Havlíková; Tomáš Szemeš; Werner Krampf                                                                                                                                                                                                                                                                                                                                                                                                                                                                                                                                                                                                  |
| EPI_ISL_852633 to 852812                                                                                                                                                                                                                                                                                                                                                                                                                                                                                                                                                                                                                                                                                                                                                                                                                                                                                                                                                                                                                                                                                                                                                                                                                                                                                                                                                                                                                                                                                                                                                                                                                                                                                                                                                                                                                                                                                                                                                                                                                                                                                                                                                                                                                                                                                                                                                                                                                                                                                                                                                                                                                                                                                                                                                                                                                                                                                                                                                                                                                                                                                                                                                                                                                                                                                                                                                                                                                                                                                                                                                                                                                                                                                                                                                                                                                                                                                                                                                                                                                                                                                                                                                                                                                                                                                                                                                                                                                                                                                                                                                                                                                                                                                                                                                                                                                                                                                                                                                                                                                                                                                                                                                                                                                                                                                                                                                                                                                                                                                                                                                                                                                                                                                                                                                                                                                                                                                                                                                                                                                                                                                                                                                                                                                                                                                                                                                                                                                                                                                                                                                                                                                                                                                                                                                                                                                                                                                                                                                                                                                                                                                                                                                                                                                                                                                                                                                                                                                                                                                                                                                                                                                                                                                                                                                                                                                                                                                                                                                                                                                                                                                                                                                                                                                                                                                                                                                                                                                                                                                                                                                                                                                                                                                                                                                                                                                                                                                                                                                                                                                                                                                                                                                                                                                                                                                                                                                                                                                                                                                                                                                                                                                                                                                                                                                                                                                                                                                                                                                                                                                                                                                                                                                                                                                                                                                                                                                                                                                                                                                                                                                                                                                                                                                                                                                                                                                                                                                                                                                                                                                                                                                                                                                                                                                                                                                                                                    | Institute of Virology, Medical Center, University of Freiburg, Freiburg, Germany                                                                            | Institute of Virology, Clinical Virus Genomics, Medical Center, University of Freiburg, Freiburg, Germany                                     | Hajo Grundmann; Jonas Fuchs; Lisa Kern; Marcus Panning; Sandra Reuter                                                                                                                                                                                                                                                                                                                                                                                                                                                                                                                                                                                                                                                                                                                                         |
| EPI_ISL_796027 to 796038, EPI_ISL_796041, EPI_ISL_796043, EPI_ISL_796045 to 796048, EPI_ISL_796050 to 796063, EPI_ISL_803866, EPI_ISL_827042                                                                                                                                                                                                                                                                                                                                                                                                                                                                                                                                                                                                                                                                                                                                                                                                                                                                                                                                                                                                                                                                                                                                                                                                                                                                                                                                                                                                                                                                                                                                                                                                                                                                                                                                                                                                                                                                                                                                                                                                                                                                                                                                                                                                                                                                                                                                                                                                                                                                                                                                                                                                                                                                                                                                                                                                                                                                                                                                                                                                                                                                                                                                                                                                                                                                                                                                                                                                                                                                                                                                                                                                                                                                                                                                                                                                                                                                                                                                                                                                                                                                                                                                                                                                                                                                                                                                                                                                                                                                                                                                                                                                                                                                                                                                                                                                                                                                                                                                                                                                                                                                                                                                                                                                                                                                                                                                                                                                                                                                                                                                                                                                                                                                                                                                                                                                                                                                                                                                                                                                                                                                                                                                                                                                                                                                                                                                                                                                                                                                                                                                                                                                                                                                                                                                                                                                                                                                                                                                                                                                                                                                                                                                                                                                                                                                                                                                                                                                                                                                                                                                                                                                                                                                                                                                                                                                                                                                                                                                                                                                                                                                                                                                                                                                                                                                                                                                                                                                                                                                                                                                                                                                                                                                                                                                                                                                                                                                                                                                                                                                                                                                                                                                                                                                                                                                                                                                                                                                                                                                                                                                                                                                                                                                                                                                                                                                                                                                                                                                                                                                                                                                                                                                                                                                                                                                                                                                                                                                                                                                                                                                                                                                                                                                                                                                                                                                                                                                                                                                                                                                                                                                                                                                                                                                                |                                                                                                                                                             |                                                                                                                                               |                                                                                                                                                                                                                                                                                                                                                                                                                                                                                                                                                                                                                                                                                                                                                                                                               |
| see above                                                                                                                                                                                                                                                                                                                                                                                                                                                                                                                                                                                                                                                                                                                                                                                                                                                                                                                                                                                                                                                                                                                                                                                                                                                                                                                                                                                                                                                                                                                                                                                                                                                                                                                                                                                                                                                                                                                                                                                                                                                                                                                                                                                                                                                                                                                                                                                                                                                                                                                                                                                                                                                                                                                                                                                                                                                                                                                                                                                                                                                                                                                                                                                                                                                                                                                                                                                                                                                                                                                                                                                                                                                                                                                                                                                                                                                                                                                                                                                                                                                                                                                                                                                                                                                                                                                                                                                                                                                                                                                                                                                                                                                                                                                                                                                                                                                                                                                                                                                                                                                                                                                                                                                                                                                                                                                                                                                                                                                                                                                                                                                                                                                                                                                                                                                                                                                                                                                                                                                                                                                                                                                                                                                                                                                                                                                                                                                                                                                                                                                                                                                                                                                                                                                                                                                                                                                                                                                                                                                                                                                                                                                                                                                                                                                                                                                                                                                                                                                                                                                                                                                                                                                                                                                                                                                                                                                                                                                                                                                                                                                                                                                                                                                                                                                                                                                                                                                                                                                                                                                                                                                                                                                                                                                                                                                                                                                                                                                                                                                                                                                                                                                                                                                                                                                                                                                                                                                                                                                                                                                                                                                                                                                                                                                                                                                                                                                                                                                                                                                                                                                                                                                                                                                                                                                                                                                                                                                                                                                                                                                                                                                                                                                                                                                                                                                                                                                                                                                                                                                                                                                                                                                                                                                                                                                                                                                                                   | Institute of Virology, University of Cologne                                                                                                                | Institute of Virology, University of Cologne                                                                                                  | Alex Thielen; Alexander Dilthey; Andreas Walker; Dominik Aschenmeier; Elena Knops; Eva Heger; Gibrán Rubio; Jörg Timm; Martin Däumer; Maximilian Damagnez; Rolf Kaiser; Saleta Sierra; Zevanya Tesselonica                                                                                                                                                                                                                                                                                                                                                                                                                                                                                                                                                                                                    |
| EPI_ISL_728346, EPI_ISL_728348, EPI_ISL_728351, EPI_ISL_728354, EPI_ISL_728357, EPI_ISL_776711, EPI_ISL_776771                                                                                                                                                                                                                                                                                                                                                                                                                                                                                                                                                                                                                                                                                                                                                                                                                                                                                                                                                                                                                                                                                                                                                                                                                                                                                                                                                                                                                                                                                                                                                                                                                                                                                                                                                                                                                                                                                                                                                                                                                                                                                                                                                                                                                                                                                                                                                                                                                                                                                                                                                                                                                                                                                                                                                                                                                                                                                                                                                                                                                                                                                                                                                                                                                                                                                                                                                                                                                                                                                                                                                                                                                                                                                                                                                                                                                                                                                                                                                                                                                                                                                                                                                                                                                                                                                                                                                                                                                                                                                                                                                                                                                                                                                                                                                                                                                                                                                                                                                                                                                                                                                                                                                                                                                                                                                                                                                                                                                                                                                                                                                                                                                                                                                                                                                                                                                                                                                                                                                                                                                                                                                                                                                                                                                                                                                                                                                                                                                                                                                                                                                                                                                                                                                                                                                                                                                                                                                                                                                                                                                                                                                                                                                                                                                                                                                                                                                                                                                                                                                                                                                                                                                                                                                                                                                                                                                                                                                                                                                                                                                                                                                                                                                                                                                                                                                                                                                                                                                                                                                                                                                                                                                                                                                                                                                                                                                                                                                                                                                                                                                                                                                                                                                                                                                                                                                                                                                                                                                                                                                                                                                                                                                                                                                                                                                                                                                                                                                                                                                                                                                                                                                                                                                                                                                                                                                                                                                                                                                                                                                                                                                                                                                                                                                                                                                                                                                                                                                                                                                                                                                                                                                                                                                                                                                                              |                                                                                                                                                             |                                                                                                                                               |                                                                                                                                                                                                                                                                                                                                                                                                                                                                                                                                                                                                                                                                                                                                                                                                               |
| see above                                                                                                                                                                                                                                                                                                                                                                                                                                                                                                                                                                                                                                                                                                                                                                                                                                                                                                                                                                                                                                                                                                                                                                                                                                                                                                                                                                                                                                                                                                                                                                                                                                                                                                                                                                                                                                                                                                                                                                                                                                                                                                                                                                                                                                                                                                                                                                                                                                                                                                                                                                                                                                                                                                                                                                                                                                                                                                                                                                                                                                                                                                                                                                                                                                                                                                                                                                                                                                                                                                                                                                                                                                                                                                                                                                                                                                                                                                                                                                                                                                                                                                                                                                                                                                                                                                                                                                                                                                                                                                                                                                                                                                                                                                                                                                                                                                                                                                                                                                                                                                                                                                                                                                                                                                                                                                                                                                                                                                                                                                                                                                                                                                                                                                                                                                                                                                                                                                                                                                                                                                                                                                                                                                                                                                                                                                                                                                                                                                                                                                                                                                                                                                                                                                                                                                                                                                                                                                                                                                                                                                                                                                                                                                                                                                                                                                                                                                                                                                                                                                                                                                                                                                                                                                                                                                                                                                                                                                                                                                                                                                                                                                                                                                                                                                                                                                                                                                                                                                                                                                                                                                                                                                                                                                                                                                                                                                                                                                                                                                                                                                                                                                                                                                                                                                                                                                                                                                                                                                                                                                                                                                                                                                                                                                                                                                                                                                                                                                                                                                                                                                                                                                                                                                                                                                                                                                                                                                                                                                                                                                                                                                                                                                                                                                                                                                                                                                                                                                                                                                                                                                                                                                                                                                                                                                                                                                                                                   | Institute of medical Microbiology and hospital Hygiene                                                                                                      | Institute of medical Microbiology and hospital Hygiene                                                                                        | Aljoscha Tersteegen; Prof. Dr. Achim Kaasch                                                                                                                                                                                                                                                                                                                                                                                                                                                                                                                                                                                                                                                                                                                                                                   |
| EPI_ISL_491174 to 491175, EPI_ISL_491178, EPI_ISL_491180, EPI_ISL_491182 to 491184, EPI_ISL_491186 to 491189, EPI_ISL_491191 to 491192, EPI_ISL_491194, EPI_ISL_491199, EPI_ISL_491202, EPI_ISL_491206 to 491211, EPI_ISL_491216 to 491219, EPI_ISL_491221 to 491222, EPI_ISL_491224 to 491264,                                                                                                                                                                                                                                                                                                                                                                                                                                                                                                                                                                                                                                                                                                                                                                                                                                                                                                                                                                                                                                                                                                                                                                                                                                                                                                                                                                                                                                                                                                                                                                                                                                                                                                                                                                                                                                                                                                                                                                                                                                                                                                                                                                                                                                                                                                                                                                                                                                                                                                                                                                                                                                                                                                                                                                                                                                                                                                                                                                                                                                                                                                                                                                                                                                                                                                                                                                                                                                                                                                                                                                                                                                                                                                                                                                                                                                                                                                                                                                                                                                                                                                                                                                                                                                                                                                                                                                                                                                                                                                                                                                                                                                                                                                                                                                                                                                                                                                                                                                                                                                                                                                                                                                                                                                                                                                                                                                                                                                                                                                                                                                                                                                                                                                                                                                                                                                                                                                                                                                                                                                                                                                                                                                                                                                                                                                                                                                                                                                                                                                                                                                                                                                                                                                                                                                                                                                                                                                                                                                                                                                                                                                                                                                                                                                                                                                                                                                                                                                                                                                                                                                                                                                                                                                                                                                                                                                                                                                                                                                                                                                                                                                                                                                                                                                                                                                                                                                                                                                                                                                                                                                                                                                                                                                                                                                                                                                                                                                                                                                                                                                                                                                                                                                                                                                                                                                                                                                                                                                                                                                                                                                                                                                                                                                                                                                                                                                                                                                                                                                                                                                                                                                                                                                                                                                                                                                                                                                                                                                                                                                                                                                                                                                                                                                                                                                                                                                                                                                                                                                                                                                                             |                                                                                                                                                             |                                                                                                                                               |                                                                                                                                                                                                                                                                                                                                                                                                                                                                                                                                                                                                                                                                                                                                                                                                               |
| EPI_ISL_491266 to 491271, EPI_ISL_491273 to 491280, EPI_ISL_491282 to 491287, EPI_ISL_491289, EPI_ISL_491291 to 491293, EPI_ISL_491297                                                                                                                                                                                                                                                                                                                                                                                                                                                                                                                                                                                                                                                                                                                                                                                                                                                                                                                                                                                                                                                                                                                                                                                                                                                                                                                                                                                                                                                                                                                                                                                                                                                                                                                                                                                                                                                                                                                                                                                                                                                                                                                                                                                                                                                                                                                                                                                                                                                                                                                                                                                                                                                                                                                                                                                                                                                                                                                                                                                                                                                                                                                                                                                                                                                                                                                                                                                                                                                                                                                                                                                                                                                                                                                                                                                                                                                                                                                                                                                                                                                                                                                                                                                                                                                                                                                                                                                                                                                                                                                                                                                                                                                                                                                                                                                                                                                                                                                                                                                                                                                                                                                                                                                                                                                                                                                                                                                                                                                                                                                                                                                                                                                                                                                                                                                                                                                                                                                                                                                                                                                                                                                                                                                                                                                                                                                                                                                                                                                                                                                                                                                                                                                                                                                                                                                                                                                                                                                                                                                                                                                                                                                                                                                                                                                                                                                                                                                                                                                                                                                                                                                                                                                                                                                                                                                                                                                                                                                                                                                                                                                                                                                                                                                                                                                                                                                                                                                                                                                                                                                                                                                                                                                                                                                                                                                                                                                                                                                                                                                                                                                                                                                                                                                                                                                                                                                                                                                                                                                                                                                                                                                                                                                                                                                                                                                                                                                                                                                                                                                                                                                                                                                                                                                                                                                                                                                                                                                                                                                                                                                                                                                                                                                                                                                                                                                                                                                                                                                                                                                                                                                                                                                                                                                                                      |                                                                                                                                                             |                                                                                                                                               |                                                                                                                                                                                                                                                                                                                                                                                                                                                                                                                                                                                                                                                                                                                                                                                                               |
| see above                                                                                                                                                                                                                                                                                                                                                                                                                                                                                                                                                                                                                                                                                                                                                                                                                                                                                                                                                                                                                                                                                                                                                                                                                                                                                                                                                                                                                                                                                                                                                                                                                                                                                                                                                                                                                                                                                                                                                                                                                                                                                                                                                                                                                                                                                                                                                                                                                                                                                                                                                                                                                                                                                                                                                                                                                                                                                                                                                                                                                                                                                                                                                                                                                                                                                                                                                                                                                                                                                                                                                                                                                                                                                                                                                                                                                                                                                                                                                                                                                                                                                                                                                                                                                                                                                                                                                                                                                                                                                                                                                                                                                                                                                                                                                                                                                                                                                                                                                                                                                                                                                                                                                                                                                                                                                                                                                                                                                                                                                                                                                                                                                                                                                                                                                                                                                                                                                                                                                                                                                                                                                                                                                                                                                                                                                                                                                                                                                                                                                                                                                                                                                                                                                                                                                                                                                                                                                                                                                                                                                                                                                                                                                                                                                                                                                                                                                                                                                                                                                                                                                                                                                                                                                                                                                                                                                                                                                                                                                                                                                                                                                                                                                                                                                                                                                                                                                                                                                                                                                                                                                                                                                                                                                                                                                                                                                                                                                                                                                                                                                                                                                                                                                                                                                                                                                                                                                                                                                                                                                                                                                                                                                                                                                                                                                                                                                                                                                                                                                                                                                                                                                                                                                                                                                                                                                                                                                                                                                                                                                                                                                                                                                                                                                                                                                                                                                                                                                                                                                                                                                                                                                                                                                                                                                                                                                                                                                   | Instituto Gulbenkian de Ciência                                                                                                                             | Instituto Gulbenkian de Ciência                                                                                                               | Cathy Paulino; Joao Sobral; João Costa; Ricardo Leite; Susana Ladeiro                                                                                                                                                                                                                                                                                                                                                                                                                                                                                                                                                                                                                                                                                                                                         |
| EPI_ISL_424345, EPI_ISL_424348, EPI_ISL_424626                                                                                                                                                                                                                                                                                                                                                                                                                                                                                                                                                                                                                                                                                                                                                                                                                                                                                                                                                                                                                                                                                                                                                                                                                                                                                                                                                                                                                                                                                                                                                                                                                                                                                                                                                                                                                                                                                                                                                                                                                                                                                                                                                                                                                                                                                                                                                                                                                                                                                                                                                                                                                                                                                                                                                                                                                                                                                                                                                                                                                                                                                                                                                                                                                                                                                                                                                                                                                                                                                                                                                                                                                                                                                                                                                                                                                                                                                                                                                                                                                                                                                                                                                                                                                                                                                                                                                                                                                                                                                                                                                                                                                                                                                                                                                                                                                                                                                                                                                                                                                                                                                                                                                                                                                                                                                                                                                                                                                                                                                                                                                                                                                                                                                                                                                                                                                                                                                                                                                                                                                                                                                                                                                                                                                                                                                                                                                                                                                                                                                                                                                                                                                                                                                                                                                                                                                                                                                                                                                                                                                                                                                                                                                                                                                                                                                                                                                                                                                                                                                                                                                                                                                                                                                                                                                                                                                                                                                                                                                                                                                                                                                                                                                                                                                                                                                                                                                                                                                                                                                                                                                                                                                                                                                                                                                                                                                                                                                                                                                                                                                                                                                                                                                                                                                                                                                                                                                                                                                                                                                                                                                                                                                                                                                                                                                                                                                                                                                                                                                                                                                                                                                                                                                                                                                                                                                                                                                                                                                                                                                                                                                                                                                                                                                                                                                                                                                                                                                                                                                                                                                                                                                                                                                                                                                                                                                                              | Instituto Nacional de Enfermedades Respiratorias                                                                                                            | Instituto Nacional de Enfermedades Respiratorias                                                                                              | Adnan Araiza Rodríguez; Alejandro Sánchez; Alfredo Ponce de León Garduño; Blanca Taboada; Carlos F. Arias.; Carolina González Torres; Celia Boukadida; Cesar Raúl González Bonilla; Concepción Grajales Muñiz; Edgar Mendieta Condado; Eduardo Becerril Vargas; Fabiola Garcés Ayala; Fernando Ledesma Barrientos; Francisco Javier Gaytán Cervantes; Francisco Pulido; Gisela Barrera Badillo; Gloria Vázquez; Guillermo M. Ruiz-Palacios; Irma López Martínez; Joel Armando Vázquez Pérez; Jorge Salas Hernández; José Arturo Martínez Orozco; José Ernesto Ramírez González; José Esteban Muñoz Medina; Lucia Hernández Rivas; Luis Alberto García Andrade; Mario Mújica Sánchez; Pavel Isa; Pilar Ramos Cervantes; Ricardo Grande; Santiago Avila Rios; Victor Hugo Borja Aburto; Violeta Ibarra Gonzalez |
| EPI_ISL_412972                                                                                                                                                                                                                                                                                                                                                                                                                                                                                                                                                                                                                                                                                                                                                                                                                                                                                                                                                                                                                                                                                                                                                                                                                                                                                                                                                                                                                                                                                                                                                                                                                                                                                                                                                                                                                                                                                                                                                                                                                                                                                                                                                                                                                                                                                                                                                                                                                                                                                                                                                                                                                                                                                                                                                                                                                                                                                                                                                                                                                                                                                                                                                                                                                                                                                                                                                                                                                                                                                                                                                                                                                                                                                                                                                                                                                                                                                                                                                                                                                                                                                                                                                                                                                                                                                                                                                                                                                                                                                                                                                                                                                                                                                                                                                                                                                                                                                                                                                                                                                                                                                                                                                                                                                                                                                                                                                                                                                                                                                                                                                                                                                                                                                                                                                                                                                                                                                                                                                                                                                                                                                                                                                                                                                                                                                                                                                                                                                                                                                                                                                                                                                                                                                                                                                                                                                                                                                                                                                                                                                                                                                                                                                                                                                                                                                                                                                                                                                                                                                                                                                                                                                                                                                                                                                                                                                                                                                                                                                                                                                                                                                                                                                                                                                                                                                                                                                                                                                                                                                                                                                                                                                                                                                                                                                                                                                                                                                                                                                                                                                                                                                                                                                                                                                                                                                                                                                                                                                                                                                                                                                                                                                                                                                                                                                                                                                                                                                                                                                                                                                                                                                                                                                                                                                                                                                                                                                                                                                                                                                                                                                                                                                                                                                                                                                                                                                                                                                                                                                                                                                                                                                                                                                                                                                                                                                                                                              | Instituto Nacional de Enfermedades Respiratorias                                                                                                            | Instituto de Diagnostico y Referencia Epidemiologicos (INDRE)                                                                                 | Araiza-Rodriguez Adnan; Arias Carlos; Barrera-Badillo Gisela; Boukadida Celia; Garcos-Ayala Fabiola; Hernandez-Rivas Lucia; Isa Pavel; Lopez Susana; Lopez-Martinez Irma; Martinez Arturo; Mendieta-Condado Edgar; Munoz-Medina Esteban; Ramirez-Gonzalez Ernesto; Rodriguez-Maldonado Abril; Sanchez Alejandro; Taboada Blanca; Vazquez-Perez Joel; Wong-Arambula Claudia                                                                                                                                                                                                                                                                                                                                                                                                                                    |
| EPI_ISL_421450 to 421452, EPI_ISL_421456, EPI_ISL_421472 to 421478, EPI_ISL_421496 to 421499, EPI_ISL_510889 to 510909, EPI_ISL_510911 to 510983, EPI_ISL_510985 to 511019, EPI_ISL_511021 to 511025, EPI_ISL_511027 to 511104, EPI_ISL_511106 to 511141, EPI_ISL_511144 to 511152, EPI_ISL_511154 to 511170, EPI_ISL_511172 to 511181, EPI_ISL_511189, EPI_ISL_511316, EPI_ISL_511319, EPI_ISL_511322, EPI_ISL_511324, EPI_ISL_511326 to 511343, EPI_ISL_511345 to 511348, EPI_ISL_511350 to 511474, EPI_ISL_511477 to 511483, EPI_ISL_511509 to 511511, EPI_ISL_511513 to 511546, EPI_ISL_511548 to 511549, EPI_ISL_511551, EPI_ISL_511553, EPI_ISL_511556 to 511576, EPI_ISL_511579, EPI_ISL_511581 to 511582, EPI_ISL_511584, EPI_ISL_511591 to 511594, EPI_ISL_511596 to 511598, EPI_ISL_511600, EPI_ISL_511603, EPI_ISL_511605, EPI_ISL_511607 to 511643, EPI_ISL_511645 to 511663, EPI_ISL_511665 to 511680, EPI_ISL_511683 to 511693, EPI_ISL_511695 to 511699, EPI_ISL_511702, EPI_ISL_511704, EPI_ISL_511706, EPI_ISL_511708 to 511711, EPI_ISL_511713 to 511730, EPI_ISL_511732 to 511738, EPI_ISL_511740 to 511744, EPI_ISL_511746 to 511750, EPI_ISL_511752, EPI_ISL_511754, EPI_ISL_511756 to 511759, EPI_ISL_511761, EPI_ISL_511763 to 511766, EPI_ISL_511768 to 511771, EPI_ISL_511773 to 511776, EPI_ISL_511778 to 511781, EPI_ISL_511783 to 511786, EPI_ISL_511788 to 511791, EPI_ISL_511793 to 511796, EPI_ISL_511798 to 511801, EPI_ISL_511803 to 511806, EPI_ISL_511808 to 511811, EPI_ISL_511813 to 511816, EPI_ISL_511818 to 511821, EPI_ISL_511823 to 511826, EPI_ISL_511828 to 511831, EPI_ISL_511833 to 511836, EPI_ISL_511838 to 511841, EPI_ISL_511843 to 511846, EPI_ISL_511848 to 511851, EPI_ISL_511853 to 511856, EPI_ISL_511858 to 511861, EPI_ISL_511863 to 511866, EPI_ISL_511868 to 511871, EPI_ISL_511873 to 511876, EPI_ISL_511878 to 511881, EPI_ISL_511883 to 511886, EPI_ISL_511888 to 511891, EPI_ISL_511893 to 511896, EPI_ISL_511898 to 511901, EPI_ISL_511903 to 511906, EPI_ISL_511908 to 511911, EPI_ISL_511913 to 511916, EPI_ISL_511918 to 511921, EPI_ISL_511923 to 511926, EPI_ISL_511928 to 511931, EPI_ISL_511933 to 511936, EPI_ISL_511938 to 511941, EPI_ISL_511943 to 511946, EPI_ISL_511948 to 511951, EPI_ISL_511953 to 511956, EPI_ISL_511958 to 511961, EPI_ISL_511963 to 511966, EPI_ISL_511968 to 511971, EPI_ISL_511973 to 511976, EPI_ISL_511978 to 511981, EPI_ISL_511983 to 511986, EPI_ISL_511988 to 511991, EPI_ISL_511993 to 511996, EPI_ISL_511998 to 512001, EPI_ISL_512003 to 512006, EPI_ISL_512008 to 512011, EPI_ISL_512013 to 512016, EPI_ISL_512018 to 512021, EPI_ISL_512023 to 512026, EPI_ISL_512028 to 512031, EPI_ISL_512033 to 512036, EPI_ISL_512038 to 512041, EPI_ISL_512043 to 512046, EPI_ISL_512048 to 512051, EPI_ISL_512053 to 512056, EPI_ISL_512058 to 512061, EPI_ISL_512063 to 512066, EPI_ISL_512068 to 512071, EPI_ISL_512073 to 512076, EPI_ISL_512078 to 512081, EPI_ISL_512083 to 512086, EPI_ISL_512088 to 512091, EPI_ISL_512093 to 512096, EPI_ISL_512098 to 512101, EPI_ISL_512103 to 512106, EPI_ISL_512108 to 512111, EPI_ISL_512113 to 512116, EPI_ISL_512118 to 512121, EPI_ISL_512123 to 512126, EPI_ISL_512128 to 512131, EPI_ISL_512133 to 512136, EPI_ISL_512138 to 512141, EPI_ISL_512143 to 512146, EPI_ISL_512148 to 512151, EPI_ISL_512153 to 512156, EPI_ISL_512158 to 512161, EPI_ISL_512163 to 512166, EPI_ISL_512168 to 512171, EPI_ISL_512173 to 512176, EPI_ISL_512178 to 512181, EPI_ISL_512183 to 512186, EPI_ISL_512188 to 512191, EPI_ISL_512193 to 512196, EPI_ISL_512198 to 512201, EPI_ISL_512203 to 512206, EPI_ISL_512208 to 512211, EPI_ISL_512213 to 512216, EPI_ISL_512218 to 512221, EPI_ISL_512223 to 512226, EPI_ISL_512228 to 512231, EPI_ISL_512233 to 512236, EPI_ISL_512238 to 512241, EPI_ISL_512243 to 512246, EPI_ISL_512248 to 512251, EPI_ISL_512253 to 512256, EPI_ISL_512258 to 512261, EPI_ISL_512263 to 512266, EPI_ISL_512268 to 512271, EPI_ISL_512273 to 512276, EPI_ISL_512278 to 512281, EPI_ISL_512283 to 512286, EPI_ISL_512288 to 512291, EPI_ISL_512293 to 512296, EPI_ISL_512298 to 512301, EPI_ISL_512303 to 512306, EPI_ISL_512308 to 512311, EPI_ISL_512313 to 512316, EPI_ISL_512318 to 512321, EPI_ISL_512323 to 512326, EPI_ISL_512328 to 512331, EPI_ISL_512333 to 512336, EPI_ISL_512338 to 512341, EPI_ISL_512343 to 512346, EPI_ISL_512348 to 512351, EPI_ISL_512353 to 512356, EPI_ISL_512358 to 512361, EPI_ISL_512363 to 512366, EPI_ISL_512368 to 512371, EPI_ISL_512373 to 512376, EPI_ISL_512378 to 512381, EPI_ISL_512383 to 512386, EPI_ISL_512388 to 512391, EPI_ISL_512393 to 512396, EPI_ISL_512398 to 512401, EPI_ISL_512403 to 512406, EPI_ISL_512408 to 512411, EPI_ISL_512413 to 512416, EPI_ISL_512418 to 512421, EPI_ISL_512423 to 512426, EPI_ISL_512428 to 512431, EPI_ISL_512433 to 512436, EPI_ISL_512438 to 512441, EPI_ISL_512443 to 512446, EPI_ISL_512448 to 512451, EPI_ISL_512453 to 512456, EPI_ISL_512458 to 512461, EPI_ISL_512463 to 512466, EPI_ISL_512468 to 512471, EPI_ISL_512473 to 512476, EPI_ISL_512478 to 512481, EPI_ISL_512483 to 512486, EPI_ISL_512488 to 512491, EPI_ISL_512493 to 512496, EPI_ISL_512498 to 512501, EPI_ISL_512503 to 512506, EPI_ISL_512508 to 512511, EPI_ISL_512513 to 512516, EPI_ISL_512518 to 512521, EPI_ISL_512523 to 512526, EPI_ISL_512528 to 512531, EPI_ISL_512533 to 512536, EPI_ISL_512538 to 512541, EPI_ISL_512543 to 512546, EPI_ISL_512548 to 512551, EPI_ISL_512553 to 512556, EPI_ISL_512558 to 512561, EPI_ISL_512563 to 512566, EPI_ISL_512568 to 512571, EPI_ISL_512573 to 512576, EPI_ISL_512578 to 512581, EPI_ISL_512583 to 512586, EPI_ISL_512588 to 512591, EPI_ISL_512593 to 512596, EPI_ISL_512598 to 512601, EPI_ISL_512603 to 512606, EPI_ISL_512608 to 512611, EPI_ISL_512613 to 512616, EPI_ISL_512618 to 512621, EPI_ISL_512623 to 512626, EPI_ISL_512628 to 512631, EPI_ISL_512633 to 512636, EPI_ISL_512638 to 512641, EPI_ISL_512643 to 512646, EPI_ISL_512648 to 512651, EPI_ISL_512653 to 512656, EPI_ISL_512658 to 512661, EPI_ISL_512663 to 512666, EPI_ISL_512668 to 512671, EPI_ISL_512673 to 512676, EPI_ISL_512678 to 512681, EPI_ISL_512683 to 512686, EPI_ISL_512688 to 512691, EPI_ISL_512693 to 512696, EPI_ISL_512698 to 512701, EPI_ISL_512703 to 512706, EPI_ISL_512708 to 512711, EPI_ISL_512713 to 512716, EPI_ISL_512718 to 512721, EPI_ISL_512723 to 512726, EPI_ISL_512728 to 512731, EPI_ISL_512733 to 512736, EPI_ISL_512738 to 512741, EPI_ISL_512743 to 512746, EPI_ISL_512748 to 512751, EPI_ISL_512753 to 512756, EPI_ISL_512758 to 512761, EPI_ISL_512763 to 512766, EPI_ISL_512768 to 512771, EPI_ISL_512773 to 512776, EPI_ISL_512778 to 512781, EPI_ISL_512783 to 512786, EPI_ISL_512788 to 512791, EPI_ISL_512793 to 512796, EPI_ISL_512798 to 512801, EPI_ISL_512803 to 512806, EPI_ISL_512808 to 512811, EPI_ISL_512813 to 512816, EPI_ISL_512818 to 512821, EPI_ISL_512823 to 512826, EPI_ISL_512828 to 512831, EPI_ISL_512833 to 512836, EPI_ISL_512838 to 512841, EPI_ISL_512843 to 512846, EPI_ISL_512848 to 512851, EPI_ISL_512853 to 512856, EPI_ISL_512858 to 512861, EPI_ISL_512863 to 512866, EPI_ISL_512868 to 512871, EPI_ISL_512873 to 512876, EPI_ISL_512878 to 512881, EPI_ISL_512883 to 512886, EPI_ISL_512888 to 512891, EPI_ISL_512893 to 512896, EPI_ISL_512898 to 512901, EPI_ISL_512903 to 512906, EPI_ISL_512908 to 512911, EPI_ISL_512913 to 512916, EPI_ISL_512918 to 512921, EPI_ISL_512923 to 512926, EPI_ISL_512928 to 512931, EPI_ISL_512933 to 512936, EPI_ISL_512938 to 512941, EPI_ISL_512943 to 512946, EPI_ISL_512948 to 512951, EPI_ISL_512953 to 512956, EPI_ISL_512958 to 512961, EPI_ISL_512963 to 512966, EPI_ISL_512968 to 512971, EPI_ISL_512973 to 512976, EPI_ISL_512978 to 512981, EPI_ISL_512983 to 512986, EPI_ISL_512988 to 512991, EPI_ISL_512993 to 512996, EPI_ISL_512998 to 513001, EPI_ISL_513003 to 513006, EPI_ISL_513008 to 513011, EPI_ISL_513013 to 513016, EPI_ISL_513018 to 513021, EPI_ISL_513023 to 513026, EPI_ISL_513028 to 513031, EPI_ISL_513033 to 513036, EPI_ISL_513038 to 513041, EPI_ISL_513043 to 513046, EPI_ISL_513048 to 513051, EPI_ISL_513053 to 513056, EPI_ISL_513058 to 513061, EPI_ISL_513063 to 513066, EPI_ISL_513068 to 513071, EPI_ISL_513073 to 513076, EPI_ISL_513078 to 513081, EPI_ISL_513083 to 513086, EPI_ISL_513088 to 513091, EPI_ISL_513093 to 513096, EPI_ISL_513098 to 513101, EPI_ISL_513103 to 513106, EPI_ISL_513108 to 513111, EPI_ISL_513113 to 513116, EPI_ISL_513118 to 513121, EPI_ISL_513123 to 513126, EPI_ISL_513128 to 513131, EPI_ISL_513133 to 513136, EPI_ISL_513138 to 513141, EPI_ISL_513143 to 513146, EPI_ISL_513148 to 513151, EPI_ISL_513153 to 513156, EPI_ISL_513158 to 513161, EPI_ISL_513163 to 513166, EPI_ISL_513168 to 513171, EPI_ISL_513173 to 513176, EPI_ISL_513178 to 513181, EPI_ISL_513183 to 513186, EPI_ISL_513188 to 513191, EPI_ISL_513193 to 513196, EPI_ISL_513198 to 513201, EPI_ISL_513203 to 513206, EPI_ISL_513208 to 513211, EPI_ISL_513213 to 513216, EPI_ISL_513218 to 513221, EPI_ISL_513223 to 513226, EPI_ISL_513228 to 513231, EPI_ISL_513233 to 513236, EPI_ISL_513238 to 513241, EPI_ISL_513243 to 513246, EPI_ISL_513248 to 513251, EPI_ISL_513253 to 513256, EPI_ISL_513258 to 513261, EPI_ISL_513263 to 513266, EPI_ISL_513268 to 513271, EPI_ISL_513273 to 513276, EPI_ISL_513278 to 513281, EPI_ISL_513283 to 513286, EPI_ISL_513288 to 513291, EPI_ISL_513293 to 513296, EPI_ISL_513298 to 513301, EPI_ISL_513303 to 513306, EPI_ISL_513308 to 513311, EPI_ISL_513313 to 513316, EPI_ISL_513318 to 513321, EPI_ISL_513323 to 513326, EPI_ISL_513328 to 513331, EPI_ISL_513333 to 513336, EPI_ISL_513338 to 513341, EPI_ISL_513343 to 513346, EPI_ISL_513348 to 513351, EPI_ISL_513353 to 513356, EPI_ISL_513358 to 513361, EPI_ISL_513363 to 513366, EPI_ISL_513368 to 513371, EPI_ISL_513373 to 513376, EPI_ISL_513378 to 513381, EPI_ISL_513383 to 513386, EPI_ISL_513388 to 513391, EPI_ISL_513393 to 513396, EPI_ISL_513398 to 513401, EPI_ISL_513403 to 513406, EPI_ISL_513408 to 513411, EPI_ISL_513413 to 513416, EPI_ISL_513418 to 513421, EPI_ISL_513423 to 513426, EPI_ISL_513428 to 513431, EPI_ISL_513433 to 513436, EPI_ISL_513438 to 513441, EPI_ISL_513443 to 513446, EPI_ISL_513448 to 513451, EPI_ISL_513453 to 513456, EPI_ISL_513458 to 513461, EPI_ISL_513463 to 513466, EPI_ISL_513468 to 513471, EPI_ISL_513473 to 513476, EPI_ISL_513478 to 513481, EPI_ISL_513483 to 513486, EPI_ISL_513488 to 513491, EPI_ISL_513493 to 513496, EPI_ISL_513498 to 513501, EPI_ISL_513503 to 513506, EPI_ISL_513508 to 513511, EPI_ISL_513513 to 513516, EPI_ISL_513518 to 513521, EPI_ISL_513523 to 513526, EPI_ISL_513528 to 513531, EPI_ISL_513533 to 513536, EPI_ISL_513538 to 513541, EPI_ISL_513543 to 513546, EPI_ISL_513548 to 513551, EPI_ISL_513553 to 513556, EPI_ISL_513558 to 513561, EPI_ISL_513563 to 513566, EPI_ISL_513568 to 513571, EPI_ISL_513573 to 513576, EPI_ISL_513578 to 513581, EPI_ISL_513583 to 513586, EPI_ISL_513588 to 513591, EPI_ISL_513593 to 513596, EPI_ISL_513598 to 513601, EPI_ISL_513603 to 513606, EPI_ISL_513608 to 513611, EPI_ISL_513613 to 513616, EPI_ISL_513618 to 513621, EPI_ISL_513623 to 513626, EPI_ISL_513628 to 513 |                                                                                                                                                             |                                                                                                                                               |                                                                                                                                                                                                                                                                                                                                                                                                                                                                                                                                                                                                                                                                                                                                                                                                               |

|                                                                                                                                                                                                                                                                                                                                                                                                                                          | Ciencia (IGC)                                                                                                                                                                                                                                                                         | de Ciencia (IGC)                                                                                             |                                                                                                                                                                                                                                                                                                                                                                                                                                                             |
|------------------------------------------------------------------------------------------------------------------------------------------------------------------------------------------------------------------------------------------------------------------------------------------------------------------------------------------------------------------------------------------------------------------------------------------|---------------------------------------------------------------------------------------------------------------------------------------------------------------------------------------------------------------------------------------------------------------------------------------|--------------------------------------------------------------------------------------------------------------|-------------------------------------------------------------------------------------------------------------------------------------------------------------------------------------------------------------------------------------------------------------------------------------------------------------------------------------------------------------------------------------------------------------------------------------------------------------|
| EPI_ISL_452139, EPI_ISL_452141                                                                                                                                                                                                                                                                                                                                                                                                           | Instituto de Diagnostico y Referencia Epidemiologicos (INDRE)                                                                                                                                                                                                                         | Instituto de diagnóstico y Referencia Epidemiologicos (INDRE)                                                | Araiza-Rodriguez Adnan; Barrera-Badillo Gisela; Garces-Ayala Fabiola; Hernandez-Rivas Lucia; Lopez-Martinez Irma; Lopez-Martinez Irma.; Mendieta-Condado Edgar; Ramirez-Gonzalez Ernesto; Rodriguez-Maldonado Abril; Wong-Arambula Claudia                                                                                                                                                                                                                  |
| EPI_ISL_510064, EPI_ISL_510066 to 510069, EPI_ISL_510071 to 510075, EPI_ISL_510077, EPI_ISL_510462 to 510466                                                                                                                                                                                                                                                                                                                             | Instituto de Investigaciones Biomédicas de Barcelona (CSIC), Hospital Clinic i Provincial de Barcelona, Instituto de Biomedicina de Valencia (CSIC), Hospital de Sant Pau                                                                                                             | SeqCOVID-SPAIN consortium/IBV(CSIC)                                                                          | Alex Soriano; Andrea Vergara; Anna M. Planas; Israel Fernández Cadenas and SeqCOVID-SPAIN consortium; Jordi Pérez Tur; Miguel J. Martínez; M <sup>a</sup> Angeles Marcos                                                                                                                                                                                                                                                                                    |
| EPI_ISL_871972, EPI_ISL_871996 to 871998                                                                                                                                                                                                                                                                                                                                                                                                 | Instituto de Salud Carlos III                                                                                                                                                                                                                                                         | Instituto de Salud Carlos III                                                                                | A. Monzón; F. Casas; I. Jiménez; Iglesias-Caballero; M. Camarero; M. Cuesta, I.; M. González-Esguevillas; M. Pozo; M. Zaballos; P. Jiménez; S. Juliá; S. Molinero Calamita; S. Varona                                                                                                                                                                                                                                                                       |
| EPI_ISL_812250                                                                                                                                                                                                                                                                                                                                                                                                                           | Invenimus AG                                                                                                                                                                                                                                                                          | Institute of Medical Virology, University of Zurich                                                          | Alexandra Trkola; Annette Audigé; Cyril Shah; Guido Bloembergen; Jon Huder; Jürg Böni; Kevin Steiner; Maria Grünberg; Maryam Zaheri; Michael Huber; Riccarda Capaul; Stefan Schmutz; Verena Kufner                                                                                                                                                                                                                                                          |
| EPI_ISL_824407 to 824408                                                                                                                                                                                                                                                                                                                                                                                                                 | Istituto Nazionale Malattie Infettive Lazzaro Spallanzani IRCCS                                                                                                                                                                                                                       | Istituto Nazionale Malattie Infettive Lazzaro Spallanzani IRCCS                                              | Antonino Di Caro; Barbara Bartolini; Cesare E.M. Gruber; Concetta Castilletti; Emanuela Giombini; Francesca Colavita; Francesco Messina; Maria R. Capobianchi; Martina Rueca; Ornella Butera; Silvia Meschi                                                                                                                                                                                                                                                 |
| EPI_ISL_477193 to 477194, EPI_ISL_477202 to 477203                                                                                                                                                                                                                                                                                                                                                                                       | Istituto Zooprofilattico Sperimentale Puglia e Basilicata;                                                                                                                                                                                                                            | Beaconlab (Bioinformatics, Evolution and Comparative Genomics lab), Dept of Biosciences, University on Mila  | Chiara M.; Manzari C.; Parisi A.; Pesole G.                                                                                                                                                                                                                                                                                                                                                                                                                 |
| EPI_ISL_477195 to 477201                                                                                                                                                                                                                                                                                                                                                                                                                 | Istituto Zooprofilattico Sperimentale Puglia e Basilicata;                                                                                                                                                                                                                            | Beaconlab (Bioinformatics, Evolution and Comparative Genomics lab), Dept of Biosciences, University on Milan | Chiara M.; Manzari C.; Parisi A.; Pesole G.                                                                                                                                                                                                                                                                                                                                                                                                                 |
| EPI_ISL_451961                                                                                                                                                                                                                                                                                                                                                                                                                           | Istituto Zooprofilattico Sperimentale Puglia e Basilicata; Dipartimento di Bioscienze, Biotecnologie e Biofarmaceutica dell'Università degli Studi di Bari "A.Moro"; Istituto di Biomembrane, Bioenergetica e Biotecnologie Molecolari del Consiglio Nazionale delle Ricerche di Bari | Beaconlab (Bioinformatics Evolution and Comparative Genomics lab), Dept of Biosciences, University of Milan  | Chiara M.; Manzari C.; Parisi A.; Pesole G.                                                                                                                                                                                                                                                                                                                                                                                                                 |
| EPI_ISL_451962                                                                                                                                                                                                                                                                                                                                                                                                                           | Istituto Zooprofilattico Sperimentale Puglia e Basilicata; Dipartimento di Bioscienze, Biotecnologie e Biofarmaceutica dell'Università degli Studi di Bari "A.Moro"; Istituto di Biomembrane, Bioenergetica e Biotecnologie Molecolari del Consiglio Nazionale delle Ricerche di Bari | Beaconlab (Bioinformatics, Evolution and Comparative Genomics lab), Dept of Biosciences, University on Milan | Chiara M.; Manzari C.; Parisi A.; Pesole G.                                                                                                                                                                                                                                                                                                                                                                                                                 |
| EPI_ISL_468914, EPI_ISL_469016, EPI_ISL_469018 to 469022, EPI_ISL_469050, EPI_ISL_525553 to 525571, EPI_ISL_525573, EPI_ISL_527380                                                                                                                                                                                                                                                                                                       |                                                                                                                                                                                                                                                                                       |                                                                                                              |                                                                                                                                                                                                                                                                                                                                                                                                                                                             |
| see above                                                                                                                                                                                                                                                                                                                                                                                                                                | Istituto Zooprofilattico Sperimentale Puglia e Basilicata; Dipartimento di Bioscienze, Biotecnologie e Biofarmaceutica dell'Università degli Studi di Bari "A.Moro"; Istituto di Biomembrane, Bioenergetica e Biotecnologie Molecolari del Consiglio Nazionale delle Ricerche di Bari | Beaconlab (Bioinformatics, Evolution and Comparative Genomics lab), Dept of Biosciences, University on Milan | Chiara M; Chiara M.; Manzari C.; Parisi A.; Pesole G.                                                                                                                                                                                                                                                                                                                                                                                                       |
| EPI_ISL_493332 to 493333, EPI_ISL_560407, EPI_ISL_882923, EPI_ISL_913449                                                                                                                                                                                                                                                                                                                                                                 | Istituto Zooprofilattico Sperimentale del Mezzogiorno                                                                                                                                                                                                                                 | INMI Lazzaro Spallanzani IRCCS                                                                               | A Di Caro; Antonino Di Caro; B Bartolini; B Pierri; Barbara Bartolini; C Buonerba; C.E.M Gruber; Cesare E.M. Gruber; Cesare EM Gruber; Concetta Castilletti; D Di Concilio; E Giombini; Emanuela Giombini; F Messina; Francesca Colavita; Francesco Messina; Giorgia Borriello; Giovanna Fusco; M. Rueca; MC Cuomo; MR Capobianchi; Maria R Capobianchi; Martina Rueca; Maurizio Viscardi; O Butera; Ornella Butera; P Cerino; Sergio Brandi; Silvia Meschi |
| EPI_ISL_736996 to 736997                                                                                                                                                                                                                                                                                                                                                                                                                 | Istituto Zooprofilattico Sperimentale del Mezzogiorno                                                                                                                                                                                                                                 | National Institute for Infectious Diseases, INMI, "L. Spallanzani" IRCCS                                     | A. Di Caro; B. Bartolini; B. Pierri; C. Buonerba; C.E.M Gruber; D. Di Concilio; E. Giombini; F. Carletti; F. Messina; M. Rueca; M.C. Cuomo; M.R Capobianchi; M.R. Capobianchi; P. Cerino                                                                                                                                                                                                                                                                    |
| EPI_ISL_736777 to 736890, EPI_ISL_776879 to 776993, EPI_ISL_776995 to 777009, EPI_ISL_778646 to 778817, EPI_ISL_833522 to 833570, EPI_ISL_837247 to 837330, EPI_ISL_837433 to 837504, EPI_ISL_960442 to 960447, EPI_ISL_960449 to 960458, EPI_ISL_960460, EPI_ISL_960463 to 960464, EPI_ISL_960466 to 960469, EPI_ISL_960471 to 960571, EPI_ISL_960574 to 960661                                                                         |                                                                                                                                                                                                                                                                                       |                                                                                                              |                                                                                                                                                                                                                                                                                                                                                                                                                                                             |
| see above                                                                                                                                                                                                                                                                                                                                                                                                                                | Istituto Zooprofilattico Sperimentale del Mezzogiorno                                                                                                                                                                                                                                 | TIGEM                                                                                                        | Andrea Ballabio; Anna Manfredi; Antonio Grimaldi; Antonio Limone; Biancamaria Pierri; Chiara Colantuono; Davide Cacchiarelli.; Denise Di Concilio; Francesco Panariello; Lucio Di Filippo; Marcello Salvi; Maria Concetta Cuomo; Patrizia Annunziata; Pellegrino Cerino; Valentina Bouche                                                                                                                                                                   |
| EPI_ISL_602304                                                                                                                                                                                                                                                                                                                                                                                                                           | Istituto Zooprofilattico Sperimentale del Mezzogiorno                                                                                                                                                                                                                                 | U.O. Diagnostica Virologica Dip. Sanità Animale IZSM                                                         | Lorena Cardillo; Maurizio Viscardi; e Giovanna Fusco                                                                                                                                                                                                                                                                                                                                                                                                        |
| EPI_ISL_763069, EPI_ISL_763071 to 763073, EPI_ISL_763094 to 763098, EPI_ISL_763138, EPI_ISL_763318, EPI_ISL_763320, EPI_ISL_763322 to 763330                                                                                                                                                                                                                                                                                             |                                                                                                                                                                                                                                                                                       |                                                                                                              |                                                                                                                                                                                                                                                                                                                                                                                                                                                             |
| see above                                                                                                                                                                                                                                                                                                                                                                                                                                | Istituto Zooprofilattico Sperimentale dell' Umbria e delle Marche -Togo Rosati                                                                                                                                                                                                        | Istituto Superiore di Sanità                                                                                 | Gabriele Vaccari; Giovanni Ianori; Ilaria Di Bartolo; Luca De Sabato; Massimo Biagetti; Monica Giammarioli                                                                                                                                                                                                                                                                                                                                                  |
| EPI_ISL_649189 to 649191, EPI_ISL_649940, EPI_ISL_653784 to 653786, EPI_ISL_653813, EPI_ISL_722873 to 722894, EPI_ISL_722901 to 722911, EPI_ISL_722913 to 722925, EPI_ISL_794745, EPI_ISL_794749, EPI_ISL_794752, EPI_ISL_794754 to 794755, EPI_ISL_794759 to 794817, EPI_ISL_876738 to 876740, EPI_ISL_876744 to 876813                                                                                                                 |                                                                                                                                                                                                                                                                                       |                                                                                                              |                                                                                                                                                                                                                                                                                                                                                                                                                                                             |
| see above                                                                                                                                                                                                                                                                                                                                                                                                                                | Istituto Zooprofilattico Sperimentale della Puglia e della Basilicata                                                                                                                                                                                                                 | Istituto Zooprofilattico Sperimentale della Puglia e della Basilicata                                        | Bianco A.; Capozzi L.; Cipolletta D.; Del Sambro L.; Galante D.; Manzulli V; Pace L.; Parisi A.; Rondinone V.                                                                                                                                                                                                                                                                                                                                               |
| EPI_ISL_422427                                                                                                                                                                                                                                                                                                                                                                                                                           | JABER AL AHMAD AL SABAH HOSPITAL - KUWAIT CITY                                                                                                                                                                                                                                        | Dasman Diabetes Institute                                                                                    | Ebaa Al-Ozairi; Fahd Al-Mulla; Qais Al-Duwairi; Rasheeba Iqbal; Sumi John                                                                                                                                                                                                                                                                                                                                                                                   |
| EPI_ISL_450821 to 450822                                                                                                                                                                                                                                                                                                                                                                                                                 | Jarpens HC                                                                                                                                                                                                                                                                            | The Public Health Agency of Sweden                                                                           | Anna Risberg; Anna-Malin Linde; Gunilla Johansson; Karin Tegmark-Wisell; Maria Lind Karlberg; Mia Brytting; Olov Svartstrom; Oskar Karlsson Lindsjo; Theresa Enkirch                                                                                                                                                                                                                                                                                        |
| EPI_ISL_728288                                                                                                                                                                                                                                                                                                                                                                                                                           | Jena University Hospital, Institute for Infectious Diseases and Infection Control                                                                                                                                                                                                     | Institute for infectious medicine & hospital hygiene, CaSe-Group                                             | Brandt; Christian; Marquet; Matthias W.; Mike; Pletz; Riccardo; Spott                                                                                                                                                                                                                                                                                                                                                                                       |
| EPI_ISL_728292 to 728293, EPI_ISL_728296, EPI_ISL_728302 to 728303, EPI_ISL_728321, EPI_ISL_728323, EPI_ISL_728331, EPI_ISL_728333, EPI_ISL_728335, EPI_ISL_728338, EPI_ISL_728341, EPI_ISL_763077, EPI_ISL_763086 to 763087, EPI_ISL_763089 to 763093, EPI_ISL_768633, EPI_ISL_768725, EPI_ISL_768727                                                                                                                                   |                                                                                                                                                                                                                                                                                       |                                                                                                              |                                                                                                                                                                                                                                                                                                                                                                                                                                                             |
| see above                                                                                                                                                                                                                                                                                                                                                                                                                                | Jena University Hospital, Institute for Infectious Diseases and Infection Control                                                                                                                                                                                                     | Institute of infectious medicine & hospital hygiene, CaSe-Group                                              | Brandt; Christian; Marquet; Matthias W.; Mike; Pletz; Riccardo; Spott                                                                                                                                                                                                                                                                                                                                                                                       |
| EPI_ISL_632938                                                                                                                                                                                                                                                                                                                                                                                                                           | Jena University Hospital; Institute for Infectious Diseases and Infection Control                                                                                                                                                                                                     | Institute of infectious medicine & hospital hygiene, CaSe-Group                                              | Brandt; Christian; Marquet; Matthias W.; Mike; Pletz; Riccardo; Spott                                                                                                                                                                                                                                                                                                                                                                                       |
| EPI_ISL_445242                                                                                                                                                                                                                                                                                                                                                                                                                           | Jokkmokks Halsocentral                                                                                                                                                                                                                                                                | The Public Health Agency of Sweden                                                                           | Anna Risberg; Anna-Malin Linde; Karin Tegmark-Wisell; Maria Lind Karlberg; Markus Beland; Mia Brytting; Olov Svartstrom; Oskar Karlsson Lindsjo; Theresa Enkirch                                                                                                                                                                                                                                                                                            |
| EPI_ISL_455101, EPI_ISL_469055 to 469056                                                                                                                                                                                                                                                                                                                                                                                                 | Jourcentralen                                                                                                                                                                                                                                                                         | The Public Health Agency of Sweden                                                                           | Anna Risberg; Anna-Malin Linde; Karin Tegmark-Wisell; Maria Lind Karlberg; Mattias Haukland; Mia Brytting; Olov Svartstrom; Oskar Karlsson Lindsjo; Petra Edquist; Reza Advani; Salvatore Ascione; Sandra Broddesson; Shamam Muradrasoli; Theresa Enkirch                                                                                                                                                                                                   |
| EPI_ISL_415154                                                                                                                                                                                                                                                                                                                                                                                                                           | KU Leuven, Clinical and Epidemiological Virology                                                                                                                                                                                                                                      | KU Leuven, Clinical and Epidemiological Virology                                                             | Bert Vanmechelen; Joan Marti-Careras; Marc Van Ranst; Piet Maes.; Tony Wawina                                                                                                                                                                                                                                                                                                                                                                               |
| EPI_ISL_415153, EPI_ISL_415155 to 415159, EPI_ISL_416467 to 416472, EPI_ISL_416475 to 416476, EPI_ISL_417422, EPI_ISL_417424 to 417430, EPI_ISL_418270, EPI_ISL_418792 to 418798, EPI_ISL_418800, EPI_ISL_418805 to 418806, EPI_ISL_418863, EPI_ISL_418981 to 418987, EPI_ISL_418989, EPI_ISL_420314 to 420345, EPI_ISL_420347, EPI_ISL_420349 to 420368, EPI_ISL_420371, EPI_ISL_420373 to 420454                                       |                                                                                                                                                                                                                                                                                       |                                                                                                              |                                                                                                                                                                                                                                                                                                                                                                                                                                                             |
| see above                                                                                                                                                                                                                                                                                                                                                                                                                                | KU Leuven, Clinical and Epidemiological Virology                                                                                                                                                                                                                                      | KU Leuven, Clinical and Epidemiological Virology                                                             | Bert Vanmechelen; Joan Marti-Carerras; Joan Marti-Carreras; Marc Van Ranst; Piet Maes; Tony Wawina                                                                                                                                                                                                                                                                                                                                                          |
| EPI_ISL_458156 to 458234, EPI_ISL_462151 to 462275, EPI_ISL_464065 to 464090, EPI_ISL_476941 to 477007, EPI_ISL_522349 to 522350, EPI_ISL_845568 to 845570, EPI_ISL_845572, EPI_ISL_845578, EPI_ISL_845580, EPI_ISL_845583, EPI_ISL_845585, EPI_ISL_845587 to 845589, EPI_ISL_845592, EPI_ISL_845594, EPI_ISL_845596, EPI_ISL_845602, EPI_ISL_845604, EPI_ISL_845606, EPI_ISL_845608, EPI_ISL_845610 to 845611, EPI_ISL_845614 to 845615 |                                                                                                                                                                                                                                                                                       |                                                                                                              |                                                                                                                                                                                                                                                                                                                                                                                                                                                             |

|                                                                                                                                                                                                                                                                                                                                                                                                                                                                                                                                                                                                                                                                                                                                                                                                                                                                                                                                    |                                                                            |                                                                                                        |                                                                                                                                                                                                                                                                                                                                                                                                                                                                    |
|------------------------------------------------------------------------------------------------------------------------------------------------------------------------------------------------------------------------------------------------------------------------------------------------------------------------------------------------------------------------------------------------------------------------------------------------------------------------------------------------------------------------------------------------------------------------------------------------------------------------------------------------------------------------------------------------------------------------------------------------------------------------------------------------------------------------------------------------------------------------------------------------------------------------------------|----------------------------------------------------------------------------|--------------------------------------------------------------------------------------------------------|--------------------------------------------------------------------------------------------------------------------------------------------------------------------------------------------------------------------------------------------------------------------------------------------------------------------------------------------------------------------------------------------------------------------------------------------------------------------|
| see above                                                                                                                                                                                                                                                                                                                                                                                                                                                                                                                                                                                                                                                                                                                                                                                                                                                                                                                          | KU Leuven, Rega Institute, Clinical and Epidemiological Virology           | KU Leuven, Rega Institute, Clinical and Epidemiological Virology                                       | Bert Vanmechelen; Joan Marti-Carerras; Piet Maes; Tony Wawina-Bokalanga                                                                                                                                                                                                                                                                                                                                                                                            |
| EPI_ISL_495411 to 495450, EPI_ISL_495452 to 495457                                                                                                                                                                                                                                                                                                                                                                                                                                                                                                                                                                                                                                                                                                                                                                                                                                                                                 | Kafkas University, Faculty of Medicine, Department of Medical Microbiology | Kafkas University, Faculty of Medicine, Department of Medical Microbiology                             | Didem Ozgur; E. Ediz Tutuncu; Murat Karamese                                                                                                                                                                                                                                                                                                                                                                                                                       |
| EPI_ISL_475137 to 475138, EPI_ISL_510825 to 510826, EPI_ISL_510832 to 510833, EPI_ISL_510836 to 510837, EPI_ISL_510859, EPI_ISL_510864 to 510865, EPI_ISL_623091, EPI_ISL_648164, EPI_ISL_676534, EPI_ISL_710605                                                                                                                                                                                                                                                                                                                                                                                                                                                                                                                                                                                                                                                                                                                   | see above                                                                  | Kalmar klinisk mikrobiologi                                                                            | The Public Health Agency of Sweden                                                                                                                                                                                                                                                                                                                                                                                                                                 |
| EPI_ISL_872571                                                                                                                                                                                                                                                                                                                                                                                                                                                                                                                                                                                                                                                                                                                                                                                                                                                                                                                     | Kamchatka Regional Children's Infectious Diseases Hospital                 | WHO National Influenza Centre Russian Federation                                                       | Anna Risberg; Anna-Malin Linde; Department of Microbiology; Karin Tegmark-Wisell; Maria Lind Karlberg; Mattias Haukland; Mia Brytting; Olov Svartstrom; Oskar Karlsson Lindsjo; Petra Edquist; Reza Advani; Sandra Broddesson; Shamam Muradrasoli; The Public Health Agency of Sweden                                                                                                                                                                              |
| EPI_ISL_444487 to 444488, EPI_ISL_444490 to 444492                                                                                                                                                                                                                                                                                                                                                                                                                                                                                                                                                                                                                                                                                                                                                                                                                                                                                 | Karolinska Universitetslaboratoriet                                        | CTMR, Karolinska Institutet, Stockholm, Sweden                                                         | Andrey Komissarov; Anna Ivanova; Artem Fadeev; Daria Danilenko; Dmitry Bazhenov; Dmitry Lioznov; Elena Nabieva; Georgii Bazykin; Ksenia Safina; Kseniya Komissarova; Mikhail Bakaev                                                                                                                                                                                                                                                                                |
| EPI_ISL_454447 to 454493, EPI_ISL_454868 to 454902, EPI_ISL_455846 to 455901, EPI_ISL_469075, EPI_ISL_469077 to 469079, EPI_ISL_475086 to 475091, EPI_ISL_475095, EPI_ISL_475136, EPI_ISL_475141 to 475142, EPI_ISL_475149 to 475150, EPI_ISL_475544 to 475547, EPI_ISL_475551 to 475552, EPI_ISL_475558 to 475561, EPI_ISL_510834 to 510835, EPI_ISL_510838 to 510840, EPI_ISL_510852, EPI_ISL_510860 to 510863, EPI_ISL_560974, EPI_ISL_615086 to 615089, EPI_ISL_676533                                                                                                                                                                                                                                                                                                                                                                                                                                                         | see above                                                                  | Karolinska Universitetslaboratoriet                                                                    | The Public Health Agency of Sweden                                                                                                                                                                                                                                                                                                                                                                                                                                 |
| EPI_ISL_534259, EPI_ISL_548257 to 548258, EPI_ISL_560989 to 560990                                                                                                                                                                                                                                                                                                                                                                                                                                                                                                                                                                                                                                                                                                                                                                                                                                                                 | Karolinska universitetslaboratoriet                                        | The Public Health Agency of Sweden                                                                     | Anna Risberg; Anna-Malin Linde; Department of Microbiology; Karin Tegmark-Wisell; Maria Lind Karlberg; Mattias Haukland; Mia Brytting; Olov Svartstrom; Oskar Karlsson Lindsjo; Petra Edquist; Reza Advani; Sandra Broddesson                                                                                                                                                                                                                                      |
| EPI_ISL_534234 to 534236, EPI_ISL_560982 to 560985                                                                                                                                                                                                                                                                                                                                                                                                                                                                                                                                                                                                                                                                                                                                                                                                                                                                                 | Karolinska universitetslaboratoriet SOLNA                                  | The Public Health Agency of Sweden                                                                     | Anna Risberg; Anna-Malin Linde; Karin Tegmark-Wisell; Maria Lind Karlberg; Mattias Haukland; Mia Brytting; Olov Svartstrom; Oskar Karlsson Lindsjo; Petra Edquist; Reza Advani; Sandra Broddesson                                                                                                                                                                                                                                                                  |
| EPI_ISL_813655 to 813656                                                                                                                                                                                                                                                                                                                                                                                                                                                                                                                                                                                                                                                                                                                                                                                                                                                                                                           | Kettering General Hospital                                                 | COVID-19 Genomics UK (COG-UK) Consortium                                                               | Christopher Moore; Fei Sang; Johnny Debebe; Jonathan Ball; Joseph Chappell; Matthew Carlisle; Matthew Loose; Nadine Holmes; Patrick McClure; Theocharis Tsoieridis; Victoria Wright                                                                                                                                                                                                                                                                                |
| EPI_ISL_413021                                                                                                                                                                                                                                                                                                                                                                                                                                                                                                                                                                                                                                                                                                                                                                                                                                                                                                                     | Klinik Hirslanden Zurich                                                   | Institute of Medical Virology, University of Zurich                                                    | Alexandra Trkola; Andrea Zbinden; Christian Ruef; Fiona Steiner; Gabriela Ziltener; Jon Huder; Jürg Böni; Maryam Zaheri; Michael Huber; Patrick Redli; Riccarda Capaul; Stefan Schmutz; Verena Kufner                                                                                                                                                                                                                                                              |
| EPI_ISL_524479                                                                                                                                                                                                                                                                                                                                                                                                                                                                                                                                                                                                                                                                                                                                                                                                                                                                                                                     | Klinik Hirslanden Zürich                                                   | Institute of Medical Virology, University of Zurich                                                    | Alexandra Trkola; Andrea Zbinden; Fiona Steiner; Gabriela Ziltener; Jon Huder; Jürg Böni; Maryam Zaheri; Michael Huber; Patrick Redli; Riccarda Capaul; Stefan Schmutz; Verena Kufner                                                                                                                                                                                                                                                                              |
| EPI_ISL_475910 to 475915                                                                                                                                                                                                                                                                                                                                                                                                                                                                                                                                                                                                                                                                                                                                                                                                                                                                                                           | Klinikum Wels-Grieskirchen                                                 | Bergthaler laboratory, CeMM Research Center for Molecular Medicine of the Austrian Academy of Sciences | Alexander Lercher; Alexandra Popa; Andreas Berghaler; Benedikt Agerer; Christoph Bock; Daniela Schmid; Dorothee von Laer; Elisabeth Puchhammer-Stoeckl; Franz Allerberger; Gregor Hörmann; Guenter Weiss; Henrique Colaco; Jakob-Wendelin Genger; Jan Laine; Judith Aberle; Kinga Rigler-Hohenwarter; Lukas Endler; Manfred Nairz; Mark Smyth; Martin Senekowitsch; Michael Schuster; Peter Hufnagl; Rainer Gattringer; Stephan Aberle; Thomas Penz; Wegene Borena |
| EPI_ISL_475101 to 475104, EPI_ISL_476140 to 476142, EPI_ISL_582808, EPI_ISL_615108, EPI_ISL_654954, EPI_ISL_660427 to 660431, EPI_ISL_661301, EPI_ISL_676492, EPI_ISL_676497 to 676501, EPI_ISL_676518, EPI_ISL_766696, EPI_ISL_766713, EPI_ISL_775546 to 775548, EPI_ISL_789017                                                                                                                                                                                                                                                                                                                                                                                                                                                                                                                                                                                                                                                   | see above                                                                  | Klinisk Mikrobiologi                                                                                   | The Public Health Agency of Sweden                                                                                                                                                                                                                                                                                                                                                                                                                                 |
| EPI_ISL_654892 to 654899, EPI_ISL_654942, EPI_ISL_654944 to 654951, EPI_ISL_660416 to 660421, EPI_ISL_661274 to 661278, EPI_ISL_661280 to 661281, EPI_ISL_661288 to 661289, EPI_ISL_661293, EPI_ISL_661302 to 661303, EPI_ISL_676489 to 676491, EPI_ISL_676494 to 676496, EPI_ISL_676502 to 676508, EPI_ISL_676520, EPI_ISL_676531 to 676532, EPI_ISL_710595 to 710604, EPI_ISL_732654, EPI_ISL_766592 to 766593, EPI_ISL_766608 to 766611, EPI_ISL_766613, EPI_ISL_766615 to 766629, EPI_ISL_766633 to 766639, EPI_ISL_766694, EPI_ISL_766707, EPI_ISL_766710 to 766712, EPI_ISL_766714, EPI_ISL_766725 to 766730, EPI_ISL_775549, EPI_ISL_775572 to 775574, EPI_ISL_775584, EPI_ISL_775588, EPI_ISL_775590 to 775592, EPI_ISL_788989 to 788990, EPI_ISL_789036 to 789045, EPI_ISL_789047, EPI_ISL_831958, EPI_ISL_831973, EPI_ISL_831980 to 831981, EPI_ISL_831990 to 831992, EPI_ISL_831996 to 831997, EPI_ISL_832001 to 832002 | see above                                                                  | Klinisk mikrobiologi                                                                                   | The Public Health Agency of Sweden                                                                                                                                                                                                                                                                                                                                                                                                                                 |
| EPI_ISL_615097 to 615100, EPI_ISL_623092 to 623094                                                                                                                                                                                                                                                                                                                                                                                                                                                                                                                                                                                                                                                                                                                                                                                                                                                                                 | Klinisk mikrobiologi Lanssjukhuset Ryhov, Jonkoping                        | The Public Health Agency of Sweden                                                                     | Anna Risberg; Anna-Malin Linde; Department of Microbiology; Karin Tegmark-Wisell; Maria Lind Karlberg; Mattias Haukland; Mia Brytting; Olov Svartstrom; Oskar Karlsson Lindsjo; Petra Edquist; Reza Advani; Sandra Broddesson; The Public Health Agency of Sweden                                                                                                                                                                                                  |
| EPI_ISL_623089                                                                                                                                                                                                                                                                                                                                                                                                                                                                                                                                                                                                                                                                                                                                                                                                                                                                                                                     | Klinisk mikrobiologi Linkoping                                             | The Public Health Agency of Sweden                                                                     | Anna Risberg; Anna-Malin Linde; Karin Tegmark-Wisell; Maria Lind Karlberg; Mattias Haukland; Mia Brytting; Olov Svartstrom; Oskar Karlsson Lindsjo; Petra Edquist; Reza Advani; Sandra Broddesson                                                                                                                                                                                                                                                                  |
| EPI_ISL_510841 to 510844, EPI_ISL_510868 to 510870, EPI_ISL_548250 to 548251, EPI_ISL_548253 to 548254, EPI_ISL_560973, EPI_ISL_615090 to 615091, EPI_ISL_615109, EPI_ISL_623087 to 623088, EPI_ISL_648169, EPI_ISL_648173, EPI_ISL_831974                                                                                                                                                                                                                                                                                                                                                                                                                                                                                                                                                                                                                                                                                         | see above                                                                  | Klinisk mikrobiologi NAL Trollhattan                                                                   | The Public Health Agency of Sweden                                                                                                                                                                                                                                                                                                                                                                                                                                 |
| EPI_ISL_429136 to 429148, EPI_ISL_429150 to 429158, EPI_ISL_429160, EPI_ISL_430860 to 430861, EPI_ISL_430863                                                                                                                                                                                                                                                                                                                                                                                                                                                                                                                                                                                                                                                                                                                                                                                                                       | Klinisk mikrobiologi Orebro                                                | The Public Health Agency of Sweden                                                                     | Anna Risberg; Anna-Malin Linde; Department of Microbiology; Karin Tegmark-Wisell; Maria Lind Karlberg; Mattias Haukland; Mia Brytting; Olov Svartstrom; Oskar Karlsson Lindsjo; Petra Edquist; Reza Advani; Sandra Broddesson; The Public Health Agency of Sweden                                                                                                                                                                                                  |
| EPI_ISL_582806 to 582807, EPI_ISL_648193                                                                                                                                                                                                                                                                                                                                                                                                                                                                                                                                                                                                                                                                                                                                                                                                                                                                                           | Klinisk mikrobiologi SAS Boras                                             | The Public Health Agency of Sweden                                                                     | Anna Risberg; Anna-Malin Linde; Karin Tegmark-Wisell; Maria Lind Karlberg; Mattias Haukland; Mia Brytting; Olov Svartstrom; Oskar Karlsson Lindsjo; Petra Edquist; Reza Advani; Sandra Broddesson                                                                                                                                                                                                                                                                  |
| EPI_ISL_475144 to 475148, EPI_ISL_475153 to 475155, EPI_ISL_475160 to 475163, EPI_ISL_510818 to 510819, EPI_ISL_510853 to 510858, EPI_ISL_582797 to 582798, EPI_ISL_582800, EPI_ISL_582835 to 582838, EPI_ISL_623090, EPI_ISL_648162, EPI_ISL_654504 to 654505, EPI_ISL_654957, EPI_ISL_710594                                                                                                                                                                                                                                                                                                                                                                                                                                                                                                                                                                                                                                     | see above                                                                  | Klinisk mikrobiologi Vasternorrland                                                                    | The Public Health Agency of Sweden                                                                                                                                                                                                                                                                                                                                                                                                                                 |
| EPI_ISL_510820 to 510824, EPI_ISL_510867, EPI_ISL_548252, EPI_ISL_560975, EPI_ISL_648133                                                                                                                                                                                                                                                                                                                                                                                                                                                                                                                                                                                                                                                                                                                                                                                                                                           | Klinisk mikrobiologi centralsjukhuset Karlstad                             | The Public Health Agency of Sweden                                                                     | Anna Risberg; Anna-Malin Linde; Department of Microbiology; Karin Tegmark-Wisell; Maria Lind Karlberg; Mattias Haukland; Mia Brytting; Olov Svartstrom; Oskar Karlsson Lindsjo; Petra Edquist; Reza Advani; Sandra Broddesson; Shamam Muradrasoli; The Public Health Agency of Sweden                                                                                                                                                                              |
| EPI_ISL_429115 to 429125, EPI_ISL_430848 to 430855, EPI_ISL_450834                                                                                                                                                                                                                                                                                                                                                                                                                                                                                                                                                                                                                                                                                                                                                                                                                                                                 | Klinisk mikrobiologi och vardhygien Halmstad                               | The Public Health Agency of Sweden                                                                     | Anna Risberg; Anna-Malin Linde; Arne Kotz; Karin Tegmark-Wisell; Maria Lind Karlberg; Mia Brytting; Olov Svartstrom; Oskar Karlsson Lindsjo; Shamam Muradrasoli; Theresa Enkirch                                                                                                                                                                                                                                                                                   |
| EPI_ISL_766692 to 766693, EPI_ISL_789012 to 789013, EPI_ISL_789029 to 789035                                                                                                                                                                                                                                                                                                                                                                                                                                                                                                                                                                                                                                                                                                                                                                                                                                                       | Klinisk mikrobiologi, Laboratoriemedicin                                   | The Public Health Agency of Sweden                                                                     | Department of Microbiology; The Public Health Agency of Sweden                                                                                                                                                                                                                                                                                                                                                                                                     |
| EPI_ISL_534256, EPI_ISL_560988                                                                                                                                                                                                                                                                                                                                                                                                                                                                                                                                                                                                                                                                                                                                                                                                                                                                                                     | Klinisk mikrobiologi, Laboratoriemedicin Gavleborg                         | The Public Health Agency of Sweden                                                                     | Anna Risberg; Anna-Malin Linde; Karin Tegmark-Wisell; Maria Lind Karlberg; Mattias Haukland; Mia Brytting; Olov Svartstrom; Oskar Karlsson Lindsjo; Petra Edquist; Reza Advani; Sandra Broddesson                                                                                                                                                                                                                                                                  |
| EPI_ISL_424703, EPI_ISL_428148, EPI_ISL_428201, EPI_ISL_548962 to 548963, EPI_ISL_549024, EPI_ISL_549026, EPI_ISL_549176                                                                                                                                                                                                                                                                                                                                                                                                                                                                                                                                                                                                                                                                                                                                                                                                           | see above                                                                  | Klinisk mikrobiologi, Region Västerbotten                                                              | Unit for Biological Agents, Department for CBRN Defence and Security, Swedish Defence Research Agency                                                                                                                                                                                                                                                                                                                                                              |
| EPI_ISL_615080 to 615085, EPI_ISL_623080 to 623085                                                                                                                                                                                                                                                                                                                                                                                                                                                                                                                                                                                                                                                                                                                                                                                                                                                                                 | Klinisk mikrobiologi, Skanes universitetssjukhus, Lund                     | The Public Health Agency of Sweden                                                                     | FOI Bioinformatics team; FOI bioinformatics team                                                                                                                                                                                                                                                                                                                                                                                                                   |
| EPI_ISL_454903, EPI_ISL_455904 to 455907                                                                                                                                                                                                                                                                                                                                                                                                                                                                                                                                                                                                                                                                                                                                                                                                                                                                                           | Klinisk mikrobiologi, UAS                                                  | The Public Health Agency of Sweden                                                                     | Anna Risberg; Anna-Malin Linde; Karin Tegmark-Wisell; Maria Lind Karlberg; Mattias Haukland; Mia Brytting; Olov Svartstrom; Oskar Karlsson Lindsjo; Petra Edquist; Reza Advani; Shamam Muradrasoli                                                                                                                                                                                                                                                                 |
| EPI_ISL_661290, EPI_ISL_676515, EPI_ISL_766630 to 766632, EPI_ISL_775531 to 775532, EPI_ISL_775542 to 775545, EPI_ISL_789048 to 789053, EPI_ISL_789055 to 789059, EPI_ISL_831979                                                                                                                                                                                                                                                                                                                                                                                                                                                                                                                                                                                                                                                                                                                                                   |                                                                            |                                                                                                        |                                                                                                                                                                                                                                                                                                                                                                                                                                                                    |

|                                                                                                                                                                                                                                                                                                                                                                                                                                                                                                                                                                                                                                                                                                                                                          |                                                                 |                                                                                                     |                                                                                                                                                                                                                                                                                                                                                                |
|----------------------------------------------------------------------------------------------------------------------------------------------------------------------------------------------------------------------------------------------------------------------------------------------------------------------------------------------------------------------------------------------------------------------------------------------------------------------------------------------------------------------------------------------------------------------------------------------------------------------------------------------------------------------------------------------------------------------------------------------------------|-----------------------------------------------------------------|-----------------------------------------------------------------------------------------------------|----------------------------------------------------------------------------------------------------------------------------------------------------------------------------------------------------------------------------------------------------------------------------------------------------------------------------------------------------------------|
| see above                                                                                                                                                                                                                                                                                                                                                                                                                                                                                                                                                                                                                                                                                                                                                | Klinisk mikrobiologi, Virustlab                                 | The Public Health Agency of Sweden                                                                  | Department of Microbiology; The Public Health Agency of Sweden                                                                                                                                                                                                                                                                                                 |
| EPI_ISL_766697                                                                                                                                                                                                                                                                                                                                                                                                                                                                                                                                                                                                                                                                                                                                           | Klinisk mikrobiologi, bakteriologi                              | The Public Health Agency of Sweden                                                                  | Department of Microbiology; The Public Health Agency of Sweden                                                                                                                                                                                                                                                                                                 |
| EPI_ISL_788999, EPI_ISL_831945 to 831946                                                                                                                                                                                                                                                                                                                                                                                                                                                                                                                                                                                                                                                                                                                 | Klinisk mikrobiologi, virus F68                                 | The Public Health Agency of Sweden                                                                  | Department of Microbiology; The Public Health Agency of Sweden                                                                                                                                                                                                                                                                                                 |
| EPI_ISL_534245, EPI_ISL_560987                                                                                                                                                                                                                                                                                                                                                                                                                                                                                                                                                                                                                                                                                                                           | Kliniskt mikrobiologiska laboratoriet                           | The Public Health Agency of Sweden                                                                  | Anna Risberg; Anna-Malin Linde; Karin Tegmark-Wisell; Maria Lind Karlberg; Mattias Haukland; Mia Brytting; Olov Svartstrom; Oskar Karlsson Lindsjo; Petra Edquist; Reza Advani; Sandra Broddesson                                                                                                                                                              |
| EPI_ISL_510871 to 510877, EPI_ISL_560976, EPI_ISL_582771 to 582775, EPI_ISL_594149 to 594153, EPI_ISL_615110, EPI_ISL_615117 to 615119, EPI_ISL_654952, EPI_ISL_660384 to 660414, EPI_ISL_661279, EPI_ISL_661284 to 661285, EPI_ISL_676512, EPI_ISL_676519                                                                                                                                                                                                                                                                                                                                                                                                                                                                                               |                                                                 |                                                                                                     |                                                                                                                                                                                                                                                                                                                                                                |
| see above                                                                                                                                                                                                                                                                                                                                                                                                                                                                                                                                                                                                                                                                                                                                                | Klinsisk mikrobiologi Linköping                                 | The Public Health Agency of Sweden                                                                  | Anna Risberg; Anna-Malin Linde; Department of Microbiology; Karin Tegmark-Wisell; Maria Lind Karlberg; Mattias Haukland; Mia Brytting; Olov Svartstrom; Oskar Karlsson Lindsjo; Petra Edquist; Reza Advani; Sandra Broddesson; The Public Health Agency of Sweden                                                                                              |
| EPI_ISL_864547 to 864562                                                                                                                                                                                                                                                                                                                                                                                                                                                                                                                                                                                                                                                                                                                                 | Knappschafts Krankenhaus Bochum                                 | Bundeswehr Institute of Microbiology                                                                | Alexandra Rehn; Antonios Katsounas; Enrico Georgi; Malena Bestehorn-Willmann; Markus Antwerpen; Mathias Walter; Mustafa Özçürümec; Roman Wölfe; Sabine Zange                                                                                                                                                                                                   |
| EPI_ISL_434659, EPI_ISL_450811                                                                                                                                                                                                                                                                                                                                                                                                                                                                                                                                                                                                                                                                                                                           | Knivsta VC                                                      | The Public Health Agency of Sweden                                                                  | Anna Risberg; Anna-Malin Linde; Johanna Carlson; Karin Tegmark-Wisell; Maria Lind Karlberg; Mia Brytting; Olov Svartstrom; Oskar Karlsson Lindsjo; Theresa Enkirch                                                                                                                                                                                             |
| EPI_ISL_754847 to 754848                                                                                                                                                                                                                                                                                                                                                                                                                                                                                                                                                                                                                                                                                                                                 | Korian Villa d'Azon                                             | National Reference Center for Viruses of Respiratory Infections, Institut Pasteur, Paris            | Angela Brisebarre; Camille Capel; Etienne Simon-Lorière; Marion Barbet; Maud Vanpeene; Méline Bizard; Sylvie Behillil; Sylvie van der Werf; Vincent Enouf                                                                                                                                                                                                      |
| EPI_ISL_869247, EPI_ISL_869250, EPI_ISL_869262 to 869264, EPI_ISL_872570                                                                                                                                                                                                                                                                                                                                                                                                                                                                                                                                                                                                                                                                                 | Krasnoyarsk Regional Clinical Hospital                          | WHO National Influenza Centre Russian Federation                                                    | Andrey Komissarov; Anna Ivanova; Artem Fadeev; Daria Danilenko; Dmitry Bazhenov; Dmitry Lioznov; Elena Nabieva; Georgii Bazykin; Ksenia Safina; Kseniya Komissarova; Mikhail Bakaev                                                                                                                                                                            |
| EPI_ISL_434657                                                                                                                                                                                                                                                                                                                                                                                                                                                                                                                                                                                                                                                                                                                                           | Kristianstadkliniken                                            | The Public Health Agency of Sweden                                                                  | Anna Risberg; Anna-Malin Linde; Karin Tegmark-Wisell; Maria Lind Karlberg; Mia Brytting; Mia Settergren Hammer; Olov Svartstrom; Oskar Karlsson Lindsjo; Theresa Enkirch                                                                                                                                                                                       |
| EPI_ISL_434651                                                                                                                                                                                                                                                                                                                                                                                                                                                                                                                                                                                                                                                                                                                                           | Krokoms Halsocentral                                            | The Public Health Agency of Sweden                                                                  | Anna Risberg; Anna-Malin Linde; Karin Tegmark-Wisell; Maria Lind Karlberg; Martin Ersson; Mia Brytting; Olov Svartstrom; Oskar Karlsson Lindsjo; Theresa Enkirch                                                                                                                                                                                               |
| EPI_ISL_539881                                                                                                                                                                                                                                                                                                                                                                                                                                                                                                                                                                                                                                                                                                                                           | Kungsbacka Narakut                                              | The Public Health Agency of Sweden                                                                  | Anna Risberg; Anna-Malin Linde; Karin Tegmark-Wisell; Maria Lind Karlberg; Mattias Haukland; Mia Brytting; Olov Svartstrom; Oskar Karlsson Lindsjo; Reza Advani; Sandra Broddesson; Theresa Enkirch                                                                                                                                                            |
| EPI_ISL_434644, EPI_ISL_450809, EPI_ISL_469067, EPI_ISL_475542, EPI_ISL_475569                                                                                                                                                                                                                                                                                                                                                                                                                                                                                                                                                                                                                                                                           | Kungsholmsdoktorn                                               | The Public Health Agency of Sweden                                                                  | Anna Risberg; Anna-Malin Linde; Karin Tegmark-Wisell; Linus Hammar; Maria Lind Karlberg; Mattias Haukland; Mia Brytting; Olov Svartstrom; Oskar Karlsson Lindsjo; Petra Edquist; Reza Advani; Sandra Broddesson; Shamam Muradrasoli; Theresa Enkirch                                                                                                           |
| EPI_ISL_434668, EPI_ISL_445232, EPI_ISL_455102, EPI_ISL_475529 to 475532, EPI_ISL_475568                                                                                                                                                                                                                                                                                                                                                                                                                                                                                                                                                                                                                                                                 | Kungsors VC                                                     | The Public Health Agency of Sweden                                                                  | Anna Risberg; Anna-Malin Linde; Jessica Karlsson; Karin Tegmark-Wisell; Maria Lind Karlberg; Mattias Haukland; Mia Brytting; Olov Svartstrom; Oskar Karlsson Lindsjo; Reza Advani; Sandra Broddesson; Theresa Enkirch                                                                                                                                          |
| EPI_ISL_420039 to 420040                                                                                                                                                                                                                                                                                                                                                                                                                                                                                                                                                                                                                                                                                                                                 | L'Air du Temps                                                  | National Reference Center for Viruses of Respiratory Infections, Institut Pasteur, Paris            | Angela Brisebarre; Etienne Simon-Lorière; Flora Donati; Marion Barbet; Maud Vanpeene; Mélanie Albert; Méline Bizard; Sylvie Behillil; Sylvie van der Werf; Vincent Enouf                                                                                                                                                                                       |
| EPI_ISL_508931                                                                                                                                                                                                                                                                                                                                                                                                                                                                                                                                                                                                                                                                                                                                           | L'Hôpital Nord-Ouest Tarare-Grandris                            | CNR Virus des Infections Respiratoires - France SUD                                                 | Alexandre Gaymard; Antonin Bal; Bruno Lina; Carine Moustaud; Florence Morfin-Sherpa; Gregory Destras; Gwendolyne Burfin; Laurence Josset; Martine Valette; Maude Bouscambert-Duchamp; Raphaëlle Lamy; Solenne Brun                                                                                                                                             |
| EPI_ISL_416499 to 416500, EPI_ISL_418234, EPI_ISL_418240                                                                                                                                                                                                                                                                                                                                                                                                                                                                                                                                                                                                                                                                                                 | LABM GH nord Essonne                                            | National Reference Center for Viruses of Respiratory Infections, Institut Pasteur, Paris            | Angela Brisebarre; Christine Lambert; Etienne Simon-Lorière; Flora Donati; Marion Barbet; Maud Vanpeene; Mélanie Albert; Méline Bizard; Méline Albert; Sylvie Behillil; Sylvie van der Werf; Vincent Enouf                                                                                                                                                     |
| EPI_ISL_428354, EPI_ISL_428361 to 428362, EPI_ISL_428365, EPI_ISL_443260, EPI_ISL_443305, EPI_ISL_443314                                                                                                                                                                                                                                                                                                                                                                                                                                                                                                                                                                                                                                                 | LABM GH nord Essonne de Longjumeau - BP 125                     | National Reference Center for Viruses of Respiratory Infections, Institut Pasteur, Paris            | Angela Brisebarre; Etienne Simon-Lorière; Flora Donati; Marion Barbet; Maud Vanpeene; Mélanie Albert; Méline Bizard; Sylvie Behillil; Sylvie van der Werf; Vincent Enouf                                                                                                                                                                                       |
| EPI_ISL_498226                                                                                                                                                                                                                                                                                                                                                                                                                                                                                                                                                                                                                                                                                                                                           | LIC                                                             | LIC                                                                                                 | LIC                                                                                                                                                                                                                                                                                                                                                            |
| EPI_ISL_443307                                                                                                                                                                                                                                                                                                                                                                                                                                                                                                                                                                                                                                                                                                                                           | La Villa Papyri                                                 | National Reference Center for Viruses of Respiratory Infections, Institut Pasteur, Paris            | Angela Brisebarre; Etienne Simon-Lorière; Flora Donati; Marion Barbet; Maud Vanpeene; Mélanie Albert; Méline Bizard; Sylvie Behillil; Sylvie van der Werf; Vincent Enouf                                                                                                                                                                                       |
| EPI_ISL_501614, EPI_ISL_501616 to 501631                                                                                                                                                                                                                                                                                                                                                                                                                                                                                                                                                                                                                                                                                                                 | Lab Microbiology, Pathology Department, William Harvey Hospital | Wellcome Sanger Institute for the COVID-19 Genomics UK (COG-UK) consortium                          | Cordelia Langford; David K. Jackson; Dominic Kwiatkowski; Ewan Harrison; Felicity Ryan and Alex Alderton; Hannah Lowe; Ian Johnston; John Sillitoe on behalf of the Wellcome Sanger Institute COVID-19 Surveillance Team ( <a href="http://www.sanger.ac.uk/covid-team">http://www.sanger.ac.uk/covid-team</a> ); Roberto Amato; Samuel Moses; Sonia Goncalves |
| EPI_ISL_419259, EPI_ISL_419264 to 419266, EPI_ISL_425048, EPI_ISL_425050 to 425064, EPI_ISL_434347 to 434365, EPI_ISL_451164 to 451182, EPI_ISL_468727 to 468746, EPI_ISL_475060 to 475082, EPI_ISL_481221 to 481233, EPI_ISL_634876 to 634895, EPI_ISL_717573 to 717575, EPI_ISL_717577 to 717593, EPI_ISL_717596 to 717633, EPI_ISL_717980 to 717983, EPI_ISL_717985, EPI_ISL_717987, EPI_ISL_717990 to 718026, EPI_ISL_745202 to 745212, EPI_ISL_745214 to 745221, EPI_ISL_794825, EPI_ISL_855902, EPI_ISL_855906, EPI_ISL_855908, EPI_ISL_855910, EPI_ISL_855912, EPI_ISL_855914, EPI_ISL_855916 to 855917, EPI_ISL_855919, EPI_ISL_855921, EPI_ISL_855923, EPI_ISL_855925, EPI_ISL_855927 to 855928, EPI_ISL_855932, EPI_ISL_855934, EPI_ISL_855942 |                                                                 |                                                                                                     |                                                                                                                                                                                                                                                                                                                                                                |
| see above                                                                                                                                                                                                                                                                                                                                                                                                                                                                                                                                                                                                                                                                                                                                                | Lab voor klinische biologie                                     | Onderzoeksgroep Virologie                                                                           | Basile Cole; Bruno Verhasselt; Hans Nauwynck; Jozefien De Clercq; Laurens Lambrechts; Linos Vandekerckhove; Marthe Pauwels; Nick Vereecke; Sebastiaan Theuns                                                                                                                                                                                                   |
| EPI_ISL_852619, EPI_ISL_852622, EPI_ISL_852628, EPI_ISL_855556, EPI_ISL_855573, EPI_ISL_855610 to 855614, EPI_ISL_856679, EPI_ISL_856682, EPI_ISL_856694, EPI_ISL_856698, EPI_ISL_856700, EPI_ISL_860095, EPI_ISL_860203 to 860205, EPI_ISL_860257, EPI_ISL_860290, EPI_ISL_860297, EPI_ISL_860794                                                                                                                                                                                                                                                                                                                                                                                                                                                       |                                                                 |                                                                                                     |                                                                                                                                                                                                                                                                                                                                                                |
| see above                                                                                                                                                                                                                                                                                                                                                                                                                                                                                                                                                                                                                                                                                                                                                | Lab. Microbiologia e Virologia, Cotugno, A.O. dei Colli         | Lab. Microbiologia e Virologia, Cotugno, A.O. dei Colli                                             | Anna Perfetti; Claudia Tiberio; Luigi Atripaldi                                                                                                                                                                                                                                                                                                                |
| EPI_ISL_560637 to 560642, EPI_ISL_860864, EPI_ISL_860869 to 860871, EPI_ISL_860882 to 860884, EPI_ISL_872203, EPI_ISL_872209, EPI_ISL_872258 to 872259, EPI_ISL_872290, EPI_ISL_872323                                                                                                                                                                                                                                                                                                                                                                                                                                                                                                                                                                   |                                                                 |                                                                                                     |                                                                                                                                                                                                                                                                                                                                                                |
| see above                                                                                                                                                                                                                                                                                                                                                                                                                                                                                                                                                                                                                                                                                                                                                | Labo Analyses Med                                               | National Reference Center for Viruses of Respiratory Infections, Institut Pasteur, Paris            | Angela Brisebarre; Camille Capel; Etienne Simon-Lorière; Fabiana Gambaro; Girard Sophie; Lefauvre Breic; Marion Barbet; Maud Vanpeene; Méline Bizard; Rouah Raquel; Sylvie Behillil; Sylvie van der Werf; Vincent Enouf                                                                                                                                        |
| EPI_ISL_593924 to 593933                                                                                                                                                                                                                                                                                                                                                                                                                                                                                                                                                                                                                                                                                                                                 | Labo Analyses Med, Puteaux                                      | National Reference Center for Viruses of Respiratory Infections, Institut Pasteur, Paris            | Etienne Simon-Lorière; Fabiana Gambaro; Maud Vanpeene; Sylvie Behillil; Sylvie van der Werf; Vincent Enouf                                                                                                                                                                                                                                                     |
| EPI_ISL_593904 to 593909                                                                                                                                                                                                                                                                                                                                                                                                                                                                                                                                                                                                                                                                                                                                 | Labo Analyses Med, Sarcelles                                    | National Reference Center for Viruses of Respiratory Infections, Institut Pasteur, Paris            | Etienne Simon-Lorière; Fabiana Gambaro; Maud Vanpeene; Sylvie Behillil; Sylvie van der Werf; Vincent Enouf                                                                                                                                                                                                                                                     |
| EPI_ISL_420063                                                                                                                                                                                                                                                                                                                                                                                                                                                                                                                                                                                                                                                                                                                                           | Labo BM - Site de Juvisy - Hopital Général                      | National Reference Center for Viruses of Respiratory Infections, Institut Pasteur, Paris            | Angela Brisebarre; Etienne Simon-Lorière; Flora Donati; Marion Barbet; Maud Vanpeene; Mélanie Albert; Méline Bizard; Sylvie Behillil; Sylvie van der Werf; Vincent Enouf                                                                                                                                                                                       |
| EPI_ISL_872313                                                                                                                                                                                                                                                                                                                                                                                                                                                                                                                                                                                                                                                                                                                                           | Labo analyses med                                               | National Reference Center for Viruses of Respiratory Infections, Institut Pasteur, Paris            | Amzalag Jonas; Angela Brisebarre; Camille Capel; Etienne Simon-Lorière; Marion Barbet; Maud Vanpeene; Méline Bizard; Sylvie Behillil; Sylvie van der Werf; Vincent Enouf                                                                                                                                                                                       |
| EPI_ISL_831404, EPI_ISL_831412, EPI_ISL_831417 to 831419, EPI_ISL_831423, EPI_ISL_831426                                                                                                                                                                                                                                                                                                                                                                                                                                                                                                                                                                                                                                                                 | Labor Dr. Krause & Kollegen MVZ GmbH                            | Robert Koch Institute, Influenza and respiratory viruses FG17 & Bioinformatics MF1, Berlin, Germany | Aleksandar Radonic; Dr. Lorentz; Marianne Wedde; Oliver Drechsel; Ralf Duerrwald; Rene Kniecinski; Stefan Kroeger; Stephan Fuchs; Thorsten Wolff                                                                                                                                                                                                               |
| EPI_ISL_803955 to 803957, EPI_ISL_831409, EPI_ISL_831411, EPI_ISL_831420 to 831421, EPI_ISL_831424 to 831425                                                                                                                                                                                                                                                                                                                                                                                                                                                                                                                                                                                                                                             | Labor Dr. Wisplinghoff - Köln                                   | Robert Koch Institute, Influenza and respiratory viruses FG17 & Bioinformatics MF1, Berlin, Germany | Aleksandar Radonic; Dr. R. Grosse; Marianne Wedde; Oliver Drechsel; Ralf Duerrwald; Rene Kniecinski; Stefan Kroeger; Stephan Fuchs; Thorsten Wolff                                                                                                                                                                                                             |
| EPI_ISL_476705, EPI_ISL_487398 to 487431                                                                                                                                                                                                                                                                                                                                                                                                                                                                                                                                                                                                                                                                                                                 | Labor Kneißler GmbH & Co. KG                                    | Heinrich Pette Institute, Leibniz Institute for Experimental Virology                               | Adam Grundhoff; Manja Czech-Sioli; Matthias Ottinger; Melanie M. Brinkmann; Nicole Fischer; Thomas Günther                                                                                                                                                                                                                                                     |
| EPI_ISL_831370 to 831372, EPI_ISL_831374, EPI_ISL_831379, EPI_ISL_831382 to 831385, EPI_ISL_831392, EPI_ISL_831394 to 831395, EPI_ISL_831398 to 831399, EPI_ISL_831401                                                                                                                                                                                                                                                                                                                                                                                                                                                                                                                                                                                   |                                                                 |                                                                                                     |                                                                                                                                                                                                                                                                                                                                                                |

|                                                                                                                                                                                                                |                                                                                                                      |                                                                                                     |                                                                                                                                                                                                                                                                                                                                                                                  |
|----------------------------------------------------------------------------------------------------------------------------------------------------------------------------------------------------------------|----------------------------------------------------------------------------------------------------------------------|-----------------------------------------------------------------------------------------------------|----------------------------------------------------------------------------------------------------------------------------------------------------------------------------------------------------------------------------------------------------------------------------------------------------------------------------------------------------------------------------------|
| see above                                                                                                                                                                                                      | Labor Krone                                                                                                          | Robert Koch Institute, Influenza and respiratory viruses FG17 & Bioinformatics MF1, Berlin, Germany | Aleksandar Radonic; Dr. Münstermann. Prof. Tiemann; Marianne Wedde; Oliver Drechsel; Ralf Duerwald; Rene Kmiecinski; Stefan Kroeger; Stephan Fuchs; Thorsten Wolff                                                                                                                                                                                                               |
| EPI_ISL_831414 to 831416                                                                                                                                                                                       | Labor Prof. Dr. G. Enders MVZ GbR                                                                                    | Robert Koch Institute, Influenza and respiratory viruses FG17 & Bioinformatics MF1, Berlin, Germany | Aleksandar Radonic; Dr. Friedemann Tewald; Marianne Wedde; Oliver Drechsel; Ralf Duerrwald; Rene Kmiecinski; Stefan Kroeger; Stephan Fuchs; Thorsten Wolff                                                                                                                                                                                                                       |
| EPI_ISL_445220                                                                                                                                                                                                 | Laboratory for Respiratory Viruses, "Cantacuzino" National Military-Medical Institute for Researarch and Development | Cantacuzino Institute                                                                               | A.Cretu; L.Ustea; M.Lazar                                                                                                                                                                                                                                                                                                                                                        |
| EPI_ISL_768818                                                                                                                                                                                                 | Laboratoire 2A2B                                                                                                     | CNR Virus des Infections Respiratoires - France SUD                                                 | Antonin Bal; Bruno Lina; Gregory Destras; Gwendolyne Burfin; Hadrien Règue; Laurence Josset; Martine Valette; Quentin Semanas                                                                                                                                                                                                                                                    |
| EPI_ISL_768825 to 768826                                                                                                                                                                                       | Laboratoire AX Bio Ocean                                                                                             | CNR Virus des Infections Respiratoires - France SUD                                                 | Antonin Bal; Bruno Lina; Gregory Destras; Gwendolyne Burfin; Hadrien Règue; Laurence Josset; Martine Valette; Quentin Semanas                                                                                                                                                                                                                                                    |
| EPI_ISL_768824                                                                                                                                                                                                 | Laboratoire BIOLAB33                                                                                                 | CNR Virus des Infections Respiratoires - France SUD                                                 | Antonin Bal; Bruno Lina; Gregory Destras; Gwendolyne Burfin; Hadrien Règue; Laurence Josset; Martine Valette; Quentin Semanas                                                                                                                                                                                                                                                    |
| EPI_ISL_768830, EPI_ISL_779848 to 779849                                                                                                                                                                       | Laboratoire BIOMED 05                                                                                                | CNR Virus des Infections Respiratoires - France SUD                                                 | Antonin Bal; Bruno Lina; Gregory Destras; Gwendolyne Burfin; Hadrien Règue; Laurence Josset; Martine Valette; Quentin Semanas                                                                                                                                                                                                                                                    |
| EPI_ISL_768819 to 768820                                                                                                                                                                                       | Laboratoire BPO-BIOEPINE                                                                                             | CNR Virus des Infections Respiratoires - France SUD                                                 | Antonin Bal; Bruno Lina; Gregory Destras; Gwendolyne Burfin; Hadrien Règue; Laurence Josset; Martine Valette; Quentin Semanas                                                                                                                                                                                                                                                    |
| EPI_ISL_768817, EPI_ISL_779836                                                                                                                                                                                 | Laboratoire Mirialis                                                                                                 | CNR Virus des Infections Respiratoires - France SUD                                                 | Antonin Bal; Bruno Lina; Gregory Destras; Gwendolyne Burfin; Hadrien Règue; Laurence Josset; Martine Valette; Quentin Semanas                                                                                                                                                                                                                                                    |
| EPI_ISL_421734 to 421763, EPI_ISL_428939 to 428962, EPI_ISL_429706 to 429750, EPI_ISL_429752 to 429791, EPI_ISL_429793 to 429800, EPI_ISL_434487 to 434515, EPI_ISL_445053 to 445076, EPI_ISL_459893 to 459906 | Laboratoire National de Sante, Microbiology, Virology                                                                | Laboratoire National de Sante, Microbiology, Epidemiology and Microbial Genomics                    | Anke Wienecke-Baldacchino; Ardasha Latsuzbaia; Catherine Ragimbeau; Guillaume Fournier; Jessica Tapp; Joel Mossong; Tamir Abdelrahman; Trung Nguyen Nguyen                                                                                                                                                                                                                       |
| see above                                                                                                                                                                                                      | Laboratoire National de Santé                                                                                        | Erasmus Medical Center                                                                              | Anne van der Linden; Annemiek van der Eijk; Bas Oude Munnink; Claudia Schapendonk; Corine GeurtsvanKessel; David Nieuwenhuijs; G. Fournier; Irina Chestakova; J. Mossong; Jeroen van Kampen; Jolanda Voermans; Marion Koopmans; Mark Pronk; Pascal Lexmond; Reina Sikkema; Richard Molenkamp; T. Abdelrahman; T. Nguyen; on behalf of the Dutch national COVID-19 response team. |
| EPI_ISL_413593                                                                                                                                                                                                 | Laboratoire National de Santé                                                                                        | Erasmus Medical Center                                                                              | Anke Wienecke-Baldacchino; Ardasha Latsuzbaia; Catherine Ragimbeau; Guillaume Fournier; Jessica Tapp; Joel Mossong; Tamir Abdelrahman; Trung Nguyen Nguyen                                                                                                                                                                                                                       |
| EPI_ISL_419562 to 419607                                                                                                                                                                                       | Laboratoire National de Santé, Microbiology, Virology                                                                | Laboratoire National de Santé, Microbiology, Epidemiology and Microbial Genomics                    | Anke Wienecke-Baldacchino; Ardasha Latsuzbaia; Catherine Ragimbeau; Guillaume Fournier; Jessica Tapp; Joel Mossong; Tamir Abdelrahman; Trung Nguyen Nguyen                                                                                                                                                                                                                       |
| EPI_ISL_417526, EPI_ISL_417528 to 417534                                                                                                                                                                       | Laboratoire Nationale de Santé, Microbiology, Virology                                                               | Laboratoire Nationale de Santé, Microbiology, Epidemiology and Microbial Genomics                   | Anke Wienecke-Baldacchino; Ardasha Latsuzbaia; Catherine Ragimbeau; Guillaume Fournier; Jessica Tapp; Joel Mossong; Tamir Abdelrahman; Trung Nguyen Nguyen                                                                                                                                                                                                                       |
| EPI_ISL_768821                                                                                                                                                                                                 | Laboratoire Novabio                                                                                                  | CNR Virus des Infections Respiratoires - France SUD                                                 | Antonin Bal; Bruno Lina; Gregory Destras; Gwendolyne Burfin; Hadrien Règue; Laurence Josset; Martine Valette; Quentin Semanas                                                                                                                                                                                                                                                    |
| EPI_ISL_754141 to 754172                                                                                                                                                                                       | Laboratoire de Microbiologie                                                                                         | National Reference Center for Viruses of Respiratory Infections, Institut Pasteur, Paris            | Angela Brisebarre; Camille Capel; Etienne Simon-Lorière; Marie-Sarah Fangous; Marion Barbet; Maud Vanpeene; Méline Bizard; Sylvie Behillil; Sylvie van der Werf; Vincent Enouf                                                                                                                                                                                                   |
| EPI_ISL_443284 to 443288                                                                                                                                                                                       | Laboratoire de Microbiologie - Bât A - CH René Dubois                                                                | National Reference Center for Viruses of Respiratory Infections, Institut Pasteur, Paris            | Angela Brisebarre; Etienne Simon-Lorière; Flora Donati; Marion Barbet; Maud Vanpeene; Mélanie Albert; Méline Bizard; Pascale Martres; Sylvie Behillil; Sylvie van der Werf; Vincent Enouf                                                                                                                                                                                        |
| EPI_ISL_754843 to 754846, EPI_ISL_754849 to 754852                                                                                                                                                             | Laboratoire de Virologie Hôpital Robert Debré                                                                        | National Reference Center for Viruses of Respiratory Infections, Institut Pasteur, Paris            | Andreoletti Laurent; Angela Brisebarre; Camille Capel; Etienne Simon-Lorière; Marion Barbet; Maud Vanpeene; Méline Bizard; Sylvie Behillil; Sylvie van der Werf; Vincent Enouf                                                                                                                                                                                                   |
| EPI_ISL_792000 to 792002, EPI_ISL_792004 to 792007                                                                                                                                                             | Laboratoire de Virologie Hôpital Robert Debré                                                                        | National Reference Center for Viruses of Respiratory Infections, Institut Pasteur, Paris            | Andreoletti Laurent; Angela Brisebarre; Camille Capel; Etienne Simon-Lorière; Marion Barbet; Maud Vanpeene; Méline Bizard; Sylvie Behillil; Sylvie van der Werf; Vincent Enouf                                                                                                                                                                                                   |
| EPI_ISL_414600, EPI_ISL_414623                                                                                                                                                                                 | Laboratoire de Virologie Institut de Virologie - INSERM U 1109 Hôpitaux Universitaires de Strasbourg                 | National Reference Center for Viruses of Respiratory Infections, Institut Pasteur, Paris            | Angela Brisebarre; Flora Donati Vincent Enouf; Marion Barbet; Maud Vanpeene; Méline Bizard; Mélinie Albert; Samira Fafi-Kremer; Sylvie Behillil; Sylvie van der Werf                                                                                                                                                                                                             |
| EPI_ISL_666870                                                                                                                                                                                                 | Laboratoire de Virologie, CHU de Caen, Normandie, France.                                                            | GRAM2.0, Université de Caen Normandie                                                               | Astrid VABRET; Estelle LEPERCHOIS; Januel VOUTEAU; Juliette ECHE; Meriadeg LE GOUIL                                                                                                                                                                                                                                                                                              |
| EPI_ISL_413996 to 413997, EPI_ISL_413999, EPI_ISL_414019 to 414023, EPI_ISL_548147 to 548175, EPI_ISL_548177 to 548199, EPI_ISL_548201 to 548202, EPI_ISL_548204 to 548235, EPI_ISL_548237 to 548242           | Laboratoire de Virologie, Hôpital Robert Debré                                                                       | Swiss National Reference Centre for Influenza                                                       | LAUBSCHER F.; LAUBSCHER Florian et al.                                                                                                                                                                                                                                                                                                                                           |
| see above                                                                                                                                                                                                      | Laboratoire de Virologie, HUG                                                                                        | National Reference Center for Viruses of Respiratory Infections, Institut Pasteur, Paris            | Andreoletti Laurent; Angela Brisebarre; Camille Capel; Etienne Simon-Lorière; Marion Barbet; Maud Vanpeene; Méline Bizard; Sylvie Behillil; Sylvie van der Werf; Vincent Enouf                                                                                                                                                                                                   |
| EPI_ISL_765479                                                                                                                                                                                                 | Laboratoire de Virologie, Hôpital Robert Debré                                                                       | CNR Virus des Infections Respiratoires - France SUD                                                 | Antonin Bal; Bruno Lina; Gregory Destras; Gwendolyne Burfin; Hadrien Règue; Laurence Josset; Martine Valette; Quentin Semanas; Sylvie Larrat                                                                                                                                                                                                                                     |
| EPI_ISL_779781 to 779782, EPI_ISL_779814 to 779835                                                                                                                                                             | Laboratoire de virologie, CHU de Grenoble                                                                            | CNR Virus des Infections Respiratoires - France SUD                                                 | Antonin Bal; Bruno Lina; Gregory Destras; Gwendolyne Burfin; Hadrien Règue; Laurence Josset; Martine Valette; Quentin Semanas; Sylvie Larrat                                                                                                                                                                                                                                     |
| EPI_ISL_634818, EPI_ISL_700349                                                                                                                                                                                 | Laboratoire de virologie, CHU de Grenoble - CS 10217 - 38043 Grenoble cedex 10                                       | CNR Virus des Infections Respiratoires - France SUD                                                 | Antonin Bal; Bruno Lina; Gregory Destras; Gwendolyne Burfin; Hadrien Règue; Laurence Josset; Martine Valette; Quentin Semanas; Sylvie Larrat                                                                                                                                                                                                                                     |
| EPI_ISL_634819, EPI_ISL_700350                                                                                                                                                                                 | Laboratoire de virologie, CHU de Grenoble - CS 10217 - 38043 Grenoble cedex 11                                       | CNR Virus des Infections Respiratoires - France SUD                                                 | Antonin Bal; Bruno Lina; Gregory Destras; Gwendolyne Burfin; Hadrien Règue; Laurence Josset; Martine Valette; Quentin Semanas; Sylvie Larrat                                                                                                                                                                                                                                     |
| EPI_ISL_634820, EPI_ISL_700351                                                                                                                                                                                 | Laboratoire de virologie, CHU de Grenoble - CS 10217 - 38043 Grenoble cedex 12                                       | CNR Virus des Infections Respiratoires - France SUD                                                 | Antonin Bal; Bruno Lina; Gregory Destras; Gwendolyne Burfin; Hadrien Règue; Laurence Josset; Martine Valette; Quentin Semanas; Sylvie Larrat                                                                                                                                                                                                                                     |
| EPI_ISL_634821, EPI_ISL_700352                                                                                                                                                                                 | Laboratoire de virologie, CHU de Grenoble - CS 10217 - 38043 Grenoble cedex 13                                       | CNR Virus des Infections Respiratoires - France SUD                                                 | Antonin Bal; Bruno Lina; Gregory Destras; Gwendolyne Burfin; Hadrien Règue; Laurence Josset; Martine Valette; Quentin Semanas; Sylvie Larrat                                                                                                                                                                                                                                     |
| EPI_ISL_634822, EPI_ISL_700353                                                                                                                                                                                 | Laboratoire de virologie, CHU de Grenoble - CS 10217 - 38043 Grenoble cedex 14                                       | CNR Virus des Infections Respiratoires - France SUD                                                 | Antonin Bal; Bruno Lina; Gregory Destras; Gwendolyne Burfin; Hadrien Règue; Laurence Josset; Martine Valette; Quentin Semanas; Sylvie Larrat                                                                                                                                                                                                                                     |
| EPI_ISL_634823, EPI_ISL_700354                                                                                                                                                                                 | Laboratoire de virologie, CHU de Grenoble - CS 10217 - 38043 Grenoble cedex 15                                       | CNR Virus des Infections Respiratoires - France SUD                                                 | Antonin Bal; Bruno Lina; Gregory Destras; Gwendolyne Burfin; Hadrien Règue; Laurence Josset; Martine Valette; Quentin Semanas; Sylvie Larrat                                                                                                                                                                                                                                     |
| EPI_ISL_634824, EPI_ISL_700355                                                                                                                                                                                 | Laboratoire de virologie, CHU de Grenoble - CS 10217 - 38043 Grenoble cedex 16                                       | CNR Virus des Infections Respiratoires - France SUD                                                 | Antonin Bal; Bruno Lina; Gregory Destras; Gwendolyne Burfin; Hadrien Règue; Laurence Josset; Martine Valette; Quentin Semanas; Sylvie Larrat                                                                                                                                                                                                                                     |
| EPI_ISL_634825, EPI_ISL_700356                                                                                                                                                                                 | Laboratoire de virologie, CHU de Grenoble - CS 10217 - 38043 Grenoble cedex 17                                       | CNR Virus des Infections Respiratoires - France SUD                                                 | Antonin Bal; Bruno Lina; Gregory Destras; Gwendolyne Burfin; Hadrien Règue; Laurence Josset; Martine Valette; Quentin Semanas; Sylvie Larrat                                                                                                                                                                                                                                     |
| EPI_ISL_634826, EPI_ISL_700357                                                                                                                                                                                 | Laboratoire de virologie, CHU de Grenoble - CS 10217 - 38043 Grenoble cedex 18                                       | CNR Virus des Infections Respiratoires - France SUD                                                 | Antonin Bal; Bruno Lina; Gregory Destras; Gwendolyne Burfin; Hadrien Règue; Laurence Josset; Martine Valette; Quentin Semanas; Sylvie Larrat                                                                                                                                                                                                                                     |
| EPI_ISL_634827, EPI_ISL_700358                                                                                                                                                                                 | Laboratoire de virologie, CHU de Grenoble - CS 10217 - 38043 Grenoble cedex 19                                       | CNR Virus des Infections Respiratoires - France SUD                                                 | Antonin Bal; Bruno Lina; Gregory Destras; Gwendolyne Burfin; Hadrien Règue; Laurence Josset; Martine Valette; Quentin Semanas; Sylvie Larrat                                                                                                                                                                                                                                     |
| EPI_ISL_634828, EPI_ISL_700359                                                                                                                                                                                 | Laboratoire de virologie, CHU de Grenoble - CS 10217 - 38043 Grenoble cedex 20                                       | CNR Virus des Infections Respiratoires - France SUD                                                 | Antonin Bal; Bruno Lina; Gregory Destras; Gwendolyne Burfin; Hadrien Règue; Laurence Josset; Martine Valette; Quentin Semanas; Sylvie Larrat                                                                                                                                                                                                                                     |
| EPI_ISL_634829, EPI_ISL_700360                                                                                                                                                                                 | Laboratoire de virologie, CHU de Grenoble - CS 10217 - 38043 Grenoble cedex 21                                       | CNR Virus des Infections Respiratoires - France SUD                                                 | Antonin Bal; Bruno Lina; Gregory Destras; Gwendolyne Burfin; Hadrien Règue; Laurence Josset; Martine Valette; Quentin Semanas; Sylvie Larrat                                                                                                                                                                                                                                     |
| EPI_ISL_634830, EPI_ISL_700361                                                                                                                                                                                 | Laboratoire de virologie, CHU de Grenoble - CS 10217 - 38043 Grenoble cedex 22                                       | CNR Virus des Infections Respiratoires - France SUD                                                 | Antonin Bal; Bruno Lina; Gregory Destras; Gwendolyne Burfin; Hadrien Règue; Laurence Josset; Martine Valette; Quentin Semanas; Sylvie Larrat                                                                                                                                                                                                                                     |
| EPI_ISL_634831, EPI_ISL_700362                                                                                                                                                                                 | Laboratoire de virologie, CHU de Grenoble - CS 10217 - 38043 Grenoble cedex 23                                       | CNR Virus des Infections Respiratoires - France SUD                                                 | Antonin Bal; Bruno Lina; Gregory Destras; Gwendolyne Burfin; Hadrien Règue; Laurence Josset; Martine Valette; Quentin Semanas; Sylvie Larrat                                                                                                                                                                                                                                     |

|                                                                                                                                                                                                                                                                                                                                                                                                                                                                                                                                                                                                                                                                                                                                                                                                                                                                                                                                                                                                                                                                                                                                                                                                                                                                                                                                                                                                                                                                                                                                                                                                                                                                                                                                                                                                                                                                                                                                                                                                                                                                                                                                                                                                                                                                                                                                                                                                                                                                                                                                                                                                                                                                                                                                                                                                                                                                                                                                                                                                                                                                                                                                                                                                                                                                      |                                                                                                                                                                                |                                                                                                                                                                                                     |                                                                                                                                                                                                                                                                                                                                                                              |
|----------------------------------------------------------------------------------------------------------------------------------------------------------------------------------------------------------------------------------------------------------------------------------------------------------------------------------------------------------------------------------------------------------------------------------------------------------------------------------------------------------------------------------------------------------------------------------------------------------------------------------------------------------------------------------------------------------------------------------------------------------------------------------------------------------------------------------------------------------------------------------------------------------------------------------------------------------------------------------------------------------------------------------------------------------------------------------------------------------------------------------------------------------------------------------------------------------------------------------------------------------------------------------------------------------------------------------------------------------------------------------------------------------------------------------------------------------------------------------------------------------------------------------------------------------------------------------------------------------------------------------------------------------------------------------------------------------------------------------------------------------------------------------------------------------------------------------------------------------------------------------------------------------------------------------------------------------------------------------------------------------------------------------------------------------------------------------------------------------------------------------------------------------------------------------------------------------------------------------------------------------------------------------------------------------------------------------------------------------------------------------------------------------------------------------------------------------------------------------------------------------------------------------------------------------------------------------------------------------------------------------------------------------------------------------------------------------------------------------------------------------------------------------------------------------------------------------------------------------------------------------------------------------------------------------------------------------------------------------------------------------------------------------------------------------------------------------------------------------------------------------------------------------------------------------------------------------------------------------------------------------------------|--------------------------------------------------------------------------------------------------------------------------------------------------------------------------------|-----------------------------------------------------------------------------------------------------------------------------------------------------------------------------------------------------|------------------------------------------------------------------------------------------------------------------------------------------------------------------------------------------------------------------------------------------------------------------------------------------------------------------------------------------------------------------------------|
| EPI_ISL_634832, EPI_ISL_700363                                                                                                                                                                                                                                                                                                                                                                                                                                                                                                                                                                                                                                                                                                                                                                                                                                                                                                                                                                                                                                                                                                                                                                                                                                                                                                                                                                                                                                                                                                                                                                                                                                                                                                                                                                                                                                                                                                                                                                                                                                                                                                                                                                                                                                                                                                                                                                                                                                                                                                                                                                                                                                                                                                                                                                                                                                                                                                                                                                                                                                                                                                                                                                                                                                       | Laboratoire de virologie, CHU de Grenoble - CS 10217 - 38043 Grenoble cedex 24                                                                                                 | CNR Virus des Infections Respiratoires - France SUD                                                                                                                                                 | Antonin Bal; Bruno Lina; Gregory Destras; Gwendolyne Burfin; Hadrien Règue; Laurence Josset; Martine Valette; Quentin Semanas; Sylvie Larrat                                                                                                                                                                                                                                 |
| EPI_ISL_634833, EPI_ISL_700364                                                                                                                                                                                                                                                                                                                                                                                                                                                                                                                                                                                                                                                                                                                                                                                                                                                                                                                                                                                                                                                                                                                                                                                                                                                                                                                                                                                                                                                                                                                                                                                                                                                                                                                                                                                                                                                                                                                                                                                                                                                                                                                                                                                                                                                                                                                                                                                                                                                                                                                                                                                                                                                                                                                                                                                                                                                                                                                                                                                                                                                                                                                                                                                                                                       | Laboratoire de virologie, CHU de Grenoble - CS 10217 - 38043 Grenoble cedex 25                                                                                                 | CNR Virus des Infections Respiratoires - France SUD                                                                                                                                                 | Antonin Bal; Bruno Lina; Gregory Destras; Gwendolyne Burfin; Hadrien Règue; Laurence Josset; Martine Valette; Quentin Semanas; Sylvie Larrat                                                                                                                                                                                                                                 |
| EPI_ISL_634834, EPI_ISL_700365                                                                                                                                                                                                                                                                                                                                                                                                                                                                                                                                                                                                                                                                                                                                                                                                                                                                                                                                                                                                                                                                                                                                                                                                                                                                                                                                                                                                                                                                                                                                                                                                                                                                                                                                                                                                                                                                                                                                                                                                                                                                                                                                                                                                                                                                                                                                                                                                                                                                                                                                                                                                                                                                                                                                                                                                                                                                                                                                                                                                                                                                                                                                                                                                                                       | Laboratoire de virologie, CHU de Grenoble - CS 10217 - 38043 Grenoble cedex 26                                                                                                 | CNR Virus des Infections Respiratoires - France SUD                                                                                                                                                 | Antonin Bal; Bruno Lina; Gregory Destras; Gwendolyne Burfin; Hadrien Règue; Laurence Josset; Martine Valette; Quentin Semanas; Sylvie Larrat                                                                                                                                                                                                                                 |
| EPI_ISL_634835, EPI_ISL_700366                                                                                                                                                                                                                                                                                                                                                                                                                                                                                                                                                                                                                                                                                                                                                                                                                                                                                                                                                                                                                                                                                                                                                                                                                                                                                                                                                                                                                                                                                                                                                                                                                                                                                                                                                                                                                                                                                                                                                                                                                                                                                                                                                                                                                                                                                                                                                                                                                                                                                                                                                                                                                                                                                                                                                                                                                                                                                                                                                                                                                                                                                                                                                                                                                                       | Laboratoire de virologie, CHU de Grenoble - CS 10217 - 38043 Grenoble cedex 27                                                                                                 | CNR Virus des Infections Respiratoires - France SUD                                                                                                                                                 | Antonin Bal; Bruno Lina; Gregory Destras; Gwendolyne Burfin; Hadrien Règue; Laurence Josset; Martine Valette; Quentin Semanas; Sylvie Larrat                                                                                                                                                                                                                                 |
| EPI_ISL_634836, EPI_ISL_700367                                                                                                                                                                                                                                                                                                                                                                                                                                                                                                                                                                                                                                                                                                                                                                                                                                                                                                                                                                                                                                                                                                                                                                                                                                                                                                                                                                                                                                                                                                                                                                                                                                                                                                                                                                                                                                                                                                                                                                                                                                                                                                                                                                                                                                                                                                                                                                                                                                                                                                                                                                                                                                                                                                                                                                                                                                                                                                                                                                                                                                                                                                                                                                                                                                       | Laboratoire de virologie, CHU de Grenoble - CS 10217 - 38043 Grenoble cedex 28                                                                                                 | CNR Virus des Infections Respiratoires - France SUD                                                                                                                                                 | Antonin Bal; Bruno Lina; Gregory Destras; Gwendolyne Burfin; Hadrien Règue; Laurence Josset; Martine Valette; Quentin Semanas; Sylvie Larrat                                                                                                                                                                                                                                 |
| EPI_ISL_634837, EPI_ISL_700368                                                                                                                                                                                                                                                                                                                                                                                                                                                                                                                                                                                                                                                                                                                                                                                                                                                                                                                                                                                                                                                                                                                                                                                                                                                                                                                                                                                                                                                                                                                                                                                                                                                                                                                                                                                                                                                                                                                                                                                                                                                                                                                                                                                                                                                                                                                                                                                                                                                                                                                                                                                                                                                                                                                                                                                                                                                                                                                                                                                                                                                                                                                                                                                                                                       | Laboratoire de virologie, CHU de Grenoble - CS 10217 - 38043 Grenoble cedex 29                                                                                                 | CNR Virus des Infections Respiratoires - France SUD                                                                                                                                                 | Antonin Bal; Bruno Lina; Gregory Destras; Gwendolyne Burfin; Hadrien Règue; Laurence Josset; Martine Valette; Quentin Semanas; Sylvie Larrat                                                                                                                                                                                                                                 |
[truncated: 3,112,133 more chars]
